# Supplementary material for: A catalyst-free bis(triflyl)ethylation/benzannulation reaction: rapid access to carbazole-based superacidic carbon acids from alkynols
Source: Royal Society of Chemistry journal article supplement (doi:10.1039/c9cc08930f), 2020-01-01

**Supporting Information for the Paper**

## **Catalyst-Free**

## **Bis(Triflyl)ethylation/Benzannulation**

# **Reaction: Rapid Access to Carbazole-based Superacidic Carbon Acids from Alkynols**

Irene Martín-Mejías,<sup>§</sup> Cristina Aragoncillo,<sup>‡</sup> Hikaru Yanai,<sup>\*†</sup> Shoki Hoshikawa,<sup>†</sup> Yuuki Fujimoto,<sup>†</sup>

Takashi Matsumoto,<sup>†</sup> and Pedro Almendros<sup>\*§</sup>

<sup>§</sup>Instituto de Química Orgánica General, IQOG-CSIC, Juan de la Cierva 3, 28006-Madrid, Spain

<sup>‡</sup>Grupo de Lactamas y Heterociclos Bioactivos, Departamento de Química Orgánica I, Unidad Asociada al CSIC, Facultad de Química, Universidad Complutense de Madrid, 28040-Madrid, Spain

<sup>†</sup>School of Pharmacy, Tokyo University of Pharmacy and Life Sciences, 1432-1 Horinouchi, Hachioji, Tokyo 192-0392, Japan

E-mails: yanai@toyaku.ac.jp; palmendros@iqog.csic.es

*Dedicated to Prof. Benito Alcaide on the occasion of his retirement*

## Table of Contents

|                                                                                                |        |
|------------------------------------------------------------------------------------------------|--------|
| General Methods                                                                                | 2      |
| Experimental Section                                                                           | 3–28   |
| X-Ray Data for Compound <b>14c</b>                                                             | 28–29  |
| Scheme S1                                                                                      | 29     |
| Computational Results and Cartesian Coordinates                                                | 30–45  |
| <sup>1</sup> H NMR, <sup>13</sup> C NMR, <sup>19</sup> F NMR, and <sup>23</sup> Na NMR Spectra | 46–109 |

**General Methods:** NMR spectra were recorded at 25 °C on a Bruker Avance AVIII-700 with cryoprobe, Bruker AMX-500, Bruker Avance III Nanobay 400, or Bruker Avance-300 spectrometers. NMR spectra were recorded in the corresponding deuterated solvent. Data are reported as follows: chemical shifts (in ppm), integration, multiplicity (s = singlet, d = doublet, t = triplet, q = quartet, quint = quintet, m = multiplet, br = broad), and coupling constants (*J*, in Hz). Chemical shifts are given in ppm relative to deuterated solvent used, CDCl<sub>3</sub> (<sup>1</sup>H, 7.27 ppm; <sup>13</sup>C, 77.0 ppm); C<sub>6</sub>D<sub>6</sub> (<sup>1</sup>H, 7.16 ppm; <sup>13</sup>C, 128.0 ppm); CD<sub>3</sub>COCD<sub>3</sub> (<sup>1</sup>H, 20.5 ppm; <sup>13</sup>C, 29.84 ppm). Chemical shifts in <sup>19</sup>F are given in ppm relative to (trifluoromethyl)benzene (C<sub>6</sub>H<sub>5</sub>CF<sub>3</sub>) in CDCl<sub>3</sub> (<sup>19</sup>F, –63.7 ppm). Chemical shifts in <sup>23</sup>Na are given in ppm relative to NaCl in D<sub>2</sub>O (<sup>23</sup>Na, 0.00 ppm). Low- and high-resolution mass spectra were taken on an AGILENT 6520 Accurate-Mass QTOF LC/MS or Waters Xevo G2-XS Tof mass spectrometers using the electronic impact (EI) or electrospray modes (ES) unless otherwise stated. Column chromatography was carried out using silica gel 60, 0.04-0.06 mm, for flash chromatography (230-400 mesh ASTM) provided by Scharlau.

## Experimental Section

Metal-promoted reaction between propargyl bromide or 3-bromo-1-butyne with indole-2-carbaldehydes. General procedure for the synthesis of alkynols **5b** and **I-IV**.

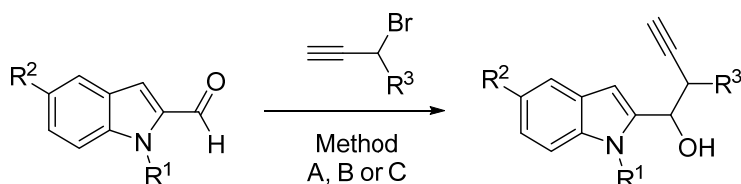

**5b** R<sup>1</sup> = Me, R<sup>2</sup> = Me, R<sup>3</sup> = H (73%)

**I** R<sup>1</sup> = Me, R<sup>2</sup> = OMe, R<sup>3</sup> = H (50%)

**II** R<sup>1</sup> = Me, R<sup>2</sup> = Cl, R<sup>3</sup> = H (70%)

**III** R<sup>1</sup> = Me, R<sup>2</sup> = Me, R<sup>3</sup> = Me (56%)

**IV** R<sup>1</sup> = Boc, R<sup>2</sup> = H, R<sup>3</sup> = H (93%)

*Method A.* Propargyl bromide (0.3 mL, 4 mmol, 2.6 equiv.) was added at room temperature to a suspension of zinc powder (11.61 mmol, 7.5 equiv.) in anhydrous THF (3.6 mL). The reaction mixture was activated by a gentle heating until a few bubbles were formed. When the formation of bubbles stopped, the reaction mixture was cooled at  $-15\text{ }^{\circ}\text{C}$  and propargyl bromide (1.3 mL, 17 mmol, 11 equiv.) was added. The mixture was further stirred at  $-15\text{ }^{\circ}\text{C}$  for 30 minutes and cooled to  $-78\text{ }^{\circ}\text{C}$ . Afterwards, a solution of the appropriate indole-2-carbaldehyde (1.55 mmol, 1 equiv.) in THF was added dropwise at  $-78\text{ }^{\circ}\text{C}$ . Then, the reaction mixture was allowed to slowly warm at room temperature and stirred overnight. After disappearance of the starting material (TLC), the mixture was washed with a solution of  $\text{NH}_4\text{Cl}$  (aq. sat.) (20 mL), extracted with  $\text{Et}_2\text{O}$  ( $3 \times 15\text{ mL}$ ) and washed with brine ( $3 \times 15\text{ mL}$ ), dried ( $\text{MgSO}_4$ ), and concentrated under reduced pressure. Chromatography of the residue using ethyl acetate/*n*-hexane mixtures gave analytically pure compounds **5b**, **I** and **II**.

*Method B.* 3-Bromo-1-butyne (3.63 mmol, 1.4 equiv.) was added dropwise to a solution of 1,5-dimethyl-1*H*-indole-2-carbaldehyde (2.6 mmol, 1 equiv.) in a mixture of solvents THF/ $\text{H}_2\text{O}$ / $\text{NH}_4\text{Cl}$  (3:3:5, 33mL) and zinc powder (5.2 mmol, 2 equiv.) at  $0\text{ }^{\circ}\text{C}$ . The reaction was stirred at room

temperature until disappearance of the starting material (TLC). Then, the mixture was extracted with ethyl acetate (2 x 25 mL). The organic extract was washed with brine, dried (MgSO<sub>4</sub>), and concentrated under reduced pressure. Chromatography of the residue using ethyl acetate/*n*-hexane mixtures gave analytically pure compound **III**.

*Method C.* Propargyl bromide (2 equiv.) was added at room temperature to a suspension of zinc powder (5 equiv) in anhydrous THF (6.0 mL). The reaction mixture was activated by a gentle heating until a few bubbles were formed. When the formation of bubbles stopped, the reaction mixture was cooled at -15 °C and propargyl bromide (8 equiv.) was added. The mixture was further stirred at -15 °C for 30 minutes and cooled to -78 °C. Afterwards, a solution of the appropriate indole-2-carbaldehyde (3.7 mmol) in THF (9.0 mL) was added dropwise at -78 °C. Then, the reaction mixture was allowed to slowly warm at room temperature and stirred overnight. The reaction mixture was quenched with a saturated solution of NH<sub>4</sub>Cl in water (20 mL) and extracted with EtOAc (3 × 15 mL). After washing the combined organic layer with brine (15 mL), it was dried over anhydrous Na<sub>2</sub>SO<sub>4</sub> and concentrated under reduced pressure. Column chromatography of the residue on silica gel using EtOAc/hexane mixtures gave the corresponding homopropargyl alcohol **IV**.

**1-(1,5-Dimethyl-1*H*-indol-2-yl)but-3-yn-1-ol 5b.** *Method A.* From 268 mg (1.55 mmol) of the corresponding aldehyde, and after flash chromatography of the residue using *n*-hexane/ethyl acetate (5:1) as eluent gave compound **5b** (240 mg, 73%) as an orange-coloured oil; <sup>1</sup>H NMR (300 MHz, CDCl<sub>3</sub>): δ = 7.38 (1H, s, CH<sub>Ar</sub>), 7.22 (1H, d, *J* = 8.4 Hz, CH<sub>Ar</sub>), 7.07 (1H, dd, *J* = 8.4, 1.4 Hz, CH<sub>Ar</sub>), 6.46 (1H, s, CH<sub>Ar</sub>), 5.05 (1H, q, *J* = 6.1 Hz, CHOH), 3.80 (3H, s, NCH<sub>3</sub>), 2.96–2.92 (2H, m, CH<sub>2</sub>), 2.44 (3H, s, CH<sub>3</sub>), 2.21 (1H, d, *J* = 6.4 Hz, OH), 2.15 (1H, t, *J* = 2.6 Hz, C≡CH); <sup>13</sup>C NMR (75 MHz, CDCl<sub>3</sub>): δ = 139.6 (C<sub>Ar</sub>), 136.3 (C<sub>Ar</sub>), 128.8 (C<sub>Ar</sub>), 127.1 (C<sub>Ar</sub>), 123.6 (CH<sub>Ar</sub>), 120.4 (CH<sub>Ar</sub>), 108.8 (CH<sub>Ar</sub>), 98.7 (CH<sub>Ar</sub>), 80.3 (C≡CH), 71.4 (C≡CH), 65.1 (CHOH), 30.0 (NCH<sub>3</sub>), 26.4 (CH<sub>2</sub>), 21.3 (CH<sub>3</sub>); IR (CHCl<sub>3</sub>): ν = 2926 (Ar), 1469 (C-O), 1292 (OH) cm<sup>-1</sup>; HRMS (ES): calcd for C<sub>14</sub>H<sub>16</sub>NO [*M* + H]<sup>+</sup>: 214.12264; found: 214.12264.

**1-(5-Methoxy-1-methyl-1*H*-indol-2-yl)but-3-yn-1-ol I.** *Method A.* From 264 mg (1.4 mmol) of the corresponding aldehyde, and after flash chromatography of the residue using *n*-hexane/ethyl acetate (5:1) as eluent gave compound **I** (160 mg, 50%) as an orange-coloured oil; <sup>1</sup>H NMR (300 MHz, CDCl<sub>3</sub>): δ = 7.21 (1H, d, *J* = 8.9 Hz, CH<sub>Ar</sub>), 7.06 (1H, d, *J* = 2.3 Hz, CH<sub>Ar</sub>), 6.90 (1H, dd, *J* = 8.9, 2.4 Hz, CH<sub>Ar</sub>), 6.46 (1H, s, CH<sub>Ar</sub>), 5.02 (1H, t, *J* = 6.2 Hz, CH-OH), 3.85 (3H, s, O-CH<sub>3</sub>), 3.78 (3H, s, N-CH<sub>3</sub>) 2.93-2.91 (2H, m, CH<sub>2</sub>), 2.35 (1H, brs, OH), 2.15 (1H, t, *J* = 2.6 Hz, C≡CH); <sup>13</sup>C NMR (75 MHz, CDCl<sub>3</sub>): δ = 154.1 (C<sub>Ar</sub>), 140.0 (C<sub>Ar</sub>), 133.3 (C<sub>Ar</sub>), 127.1 (C<sub>Ar</sub>), 112.4 (CH<sub>Ar</sub>), 109.9 (CH<sub>Ar</sub>), 102.4 (CH<sub>Ar</sub>), 98.8 (CH<sub>Ar</sub>), 80.3 (C≡CH), 71.6 (C≡CH), 65.2 (CH-OH), 56.8 (O-CH<sub>3</sub>), 30.2 (N-CH<sub>3</sub>), 26.5 (CH<sub>2</sub>); IR (CHCl<sub>3</sub>): ν = 3281 (C≡CH), 2993 (Ar), 1484 (C-O), 1211 (C-OH) cm<sup>-1</sup>; HRMS (ES): calcd for C<sub>14</sub>H<sub>16</sub>NO<sub>2</sub> [*M* + H]<sup>+</sup>: 230.11756; found: 230.11699.

**1-(5-Chloro-1-methyl-1*H*-indol-2-yl)but-3-yn-1-ol II.** *Method A.* From 600 mg (3.1 mmol) of the corresponding aldehyde, and after flash chromatography of the residue using *n*-hexane/ethyl acetate (5:1) as eluent gave compound **II** (505 mg, 70%) as an yellow-coloured oil; <sup>1</sup>H NMR (300 MHz, CDCl<sub>3</sub>): δ = 7.54 (1H, d, *J* = 0.9 Hz, CH<sub>Ar</sub>), 7.22-7.15 (2H, m, CH<sub>Ar</sub>), 6.44 (1H, s, H<sub>Ar</sub>), 5.00-4.99 (1H, m, CH-OH), 3.76 (3H, s, N-CH<sub>3</sub>), 2.90 (2H, dd, *J* = 6.3, 2.6 Hz, CH<sub>2</sub>), 2.49 (1H, brs, OH), 2.16 (1H, t, *J* = 2.6 Hz, C≡CH); <sup>13</sup>C NMR (75 MHz, CDCl<sub>3</sub>): δ = 140.8 (C<sub>Ar</sub>), 136.2 (C<sub>Ar</sub>), 127.8 (C<sub>Ar</sub>), 125.2 (C<sub>Ar</sub>), 122.3 (CH<sub>Ar</sub>), 120.1 (CH<sub>Ar</sub>), 110.1 (CH<sub>Ar</sub>), 98.9 (CH<sub>Ar</sub>), 80.0 (C≡CH), 71.8 (C≡CH), 65.0 (CH-OH), 30.2 (N-CH<sub>3</sub>), 26.4 (CH<sub>2</sub>); IR (CHCl<sub>3</sub>): ν = 3293 (C≡CH), 1473 (C-OH) cm<sup>-1</sup>; HRMS (ES): calcd for C<sub>13</sub>H<sub>13</sub>ClNO [*M* + H]<sup>+</sup>: 234.06802; found: 234.06814.

**1-(1,5-Dimethyl-1*H*-indol-2-yl)-2-methylbut-3-yn-1-ol III.** *Method B.* From 450 mg (2.6 mmol) of the corresponding aldehyde, and after flash chromatography of the residue using *n*-hexane/ethyl acetate (5:1) as eluent gave compound **III** in a ratio 83:17 (330 mg, 56%) as an yellow-coloured oil; <sup>1</sup>H NMR (300 MHz, CDCl<sub>3</sub>): δ = 7.29 (1H, s, CH<sub>Ar</sub>, M+m), 7.11 (1H, d, *J* = 8.4 Hz, CH<sub>Ar</sub>, M+m), 6.97 (1H, dd, *J* = 8.4, 1.2 Hz, CH<sub>Ar</sub>, M+m), 6.47 (0.15H, s, CH<sub>Ar</sub>, m), 6.39 (0.85H, s, CH<sub>Ar</sub>, M), 4.71

(0.16H, d,  $J = 7.1$  Hz, CH-OH, m), 4.59 (0.84H, d,  $J = 6.4$  Hz, CH-OH, M), 3.69 (2.52H, s, N-CH<sub>3</sub>, M), 3.66 (0.48H, s, N-CH<sub>3</sub>, m), 3.07 (0.81H, pd,  $J = 7.0, 2.3$  Hz, CH-CH<sub>3</sub>, M), 2.96 (0.19H, ddd,  $J = 14.0, 7.0, 2.4$  Hz, CH-CH<sub>3</sub>, m), 2.36 (3H, s, C-CH<sub>3</sub>, M+m), 2.18 (0.78H, d,  $J = 2.4$  Hz, C≡CH, M), 2.02 (0.22H,  $J = 2.5$  Hz, C≡CH, m), 1.28 (0.5H, d,  $J = 7.0$  Hz, CH-CH<sub>3</sub>, m), 1.19 (2.5H, d,  $J = 7.0$  Hz, CH-CH<sub>3</sub>, M); <sup>13</sup>C NMR (75 MHz, CDCl<sub>3</sub>):  $\delta = 139.6$  (C<sub>Ar</sub>, m), 138.8 (C<sub>Ar</sub>, M), 136.3 (C<sub>Ar</sub>, M), 136.1 (C<sub>Ar</sub>, m), 128.8 (C<sub>Ar</sub>, M+m), 127.3 (C<sub>Ar</sub>, m), 127.2 (C<sub>Ar</sub>, M), 123.5 (CH<sub>Ar</sub>, M), 123.4 (CH<sub>Ar</sub>, m), 120.4 (CH<sub>Ar</sub>, m), 120.4 (CH<sub>Ar</sub>, M), 108.8 (CH<sub>Ar</sub>, M+m), 99.9 (CH<sub>Ar</sub>, M), 99.5 (CH<sub>Ar</sub>, m), 85.5 (C≡CH, m), 85.1 (C≡CH, M), 72.0 (C≡CH, M), 71.0 (C≡CH, m), 70.3 (CH-OH, M), 69.8 (CH-OH, m), 32.5 (N-CH<sub>3</sub>, M), 32.4 (N-CH<sub>3</sub>, m), 30.3 (CH-OH, M), 30.1 (CH-OH, m), 21.6 (CH<sub>3</sub>, m), 21.3 (CH<sub>3</sub>, M), 18.2 (CH<sub>3</sub>, M), 16.9 (CH<sub>3</sub>, m); IR (CHCl<sub>3</sub>):  $\nu = 3290$  (C≡CH), 2932 (Ar), 1542 (C-OH) cm<sup>-1</sup>; HRMS (ES): calcd for C<sub>15</sub>H<sub>18</sub>NO [ $M + H$ ]<sup>+</sup>: 228.13829; found: 228.13870.

***tert*-Butyl 2-(1-hydroxybut-3-yn-1-yl)-1*H*-indole-1-carboxylate IV.** *Method C.* From the corresponding aldehyde [D. Uredi, D. R. Motati, E. B. Watkins, *Org. Lett.* **2018**, *20*, 6336] (900 mg, 3.67 mmol), compound **IV** was obtained in 93% yield (975 mg, 3.42 mmol) as a colourless oil after column chromatography on silica gel (EtOAc/hexane = 1 :3). <sup>1</sup>H NMR (400 MHz, CDCl<sub>3</sub>):  $\delta = 7.99$  (1H, d,  $J = 8.0$  Hz), 7.53 (1H, d,  $J = 8.0$  Hz), 7.29 (1H, dd,  $J = 8.0, 7.2$  Hz), 7.22 (1H, dd,  $J = 8.0, 7.2$  Hz), 6.72 (1H, s), 5.28 (1H, t,  $J = 6.4$  Hz), 4.25 (1H, brs), 2.94 (1H, ddd,  $J = 17.2, 6.4, 2.8$  Hz), 2.87 (1H, ddd,  $J = 17.2, 6.4, 2.8$  Hz), 2.06 (1H, t,  $J = 2.8$  Hz), 1.72 (9H, s); <sup>13</sup>C NMR (100 MHz, CDCl<sub>3</sub>):  $\delta = 151.5, 141.4, 136.3, 128.8, 124.6, 123.1, 121.0, 115.7, 108.5, 85.3, 80.5, 70.7, 66.4, 28.2, 25.6$ ; IR (neat):  $\nu = 3471, 3293, 2975, 1795, 1723, 1455, 1332, 1158, 749$  cm<sup>-1</sup>; HRMS (ESI-TOF): calcd for C<sub>17</sub>H<sub>19</sub>NNaO<sub>3</sub> [ $M + Na$ ]<sup>+</sup>: 308.1263; found: 308.1258.

**Palladium-catalyzed reaction between iodoarenes and terminal alkynes 5b and I–IV. General procedure for the synthesis of aryl-substituted alkynes 5a and 5c–n.** PdCl<sub>2</sub>(PPh<sub>3</sub>)<sub>2</sub> (0.00352 mmol, 1% mol), CuI (0.00703 mmol, 2% mol), were sequentially added to a solution of the corresponding terminal alkyne (0.352 mmol, 1 equiv.) in Et<sub>3</sub>N (0.7 mL) at room temperature. After

five minutes, the appropriate iodoarene (0.703 mmol, 2 equiv.) in Et<sub>3</sub>N (0.7 mL) was added under argon atmosphere. The reaction mixture was stirred at room temperature. After completion of the reaction as indicated by TLC, the mixture was poured into water (5 mL) and extracted with ethyl acetate (3 x 5 mL). The organic layer was washed with water (2 x 10 mL) and brine (2 x 10 mL), dried over MgSO<sub>4</sub>, and concentrated under reduced pressure. Chromatography of the residue eluting with *n*-hexane/ethyl acetate mixtures gave analytically pure compounds. Spectroscopic and analytical data for compounds **5a**, **5c–n** follow.

**1-(1,5-Dimethyl-1*H*-indol-2-yl)-4-(4-methoxyphenyl)but-3-yn-1-ol 5a.** From 75 mg (0.35 mmol) of alkyne **5b**, and after flash chromatography of the residue using *n*-hexane/ethyl acetate (3:1) as eluent gave compound **5a** (60 mg, 53%) as a yellow oil; <sup>1</sup>H NMR (300 MHz, CDCl<sub>3</sub>): δ = 7.40–7.39 (1H, m, CH<sub>Ar</sub>), 7.36 (2H, AA'XX', 2 CH<sub>Ar</sub> PMP), 7.23 (1H, d, *J* = 8.4 Hz, CH<sub>Ar</sub>), 7.07 (1H, dd, *J* = 8.3, 1.4 Hz, CH<sub>Ar</sub>), 6.83 (2H, AA'XX', 2 CH<sub>Ar</sub> PMP), 6.52 (1H, brs, CH<sub>Ar</sub>), 5.10 (1H, t, *J* = 6.2 Hz, CHOH), 3.83 (3H, s, CH<sub>3</sub>), 3.81 (3H, s, CH<sub>3</sub>), 3.14 (2H, dd, *J* = 6.3, 2.0 Hz, CH<sub>2</sub>), 2.46 (3H, s, CCH<sub>3</sub>); <sup>13</sup>C NMR (75 MHz, CDCl<sub>3</sub>): δ = 159.5 (C<sub>Ar</sub>), 140.1 (C<sub>Ar</sub>), 136.4 (C<sub>Ar</sub>), 133.1 (2xCH<sub>Ar</sub>), 128.8 (C<sub>Ar</sub>), 127.3 (C<sub>Ar</sub>), 123.6 (CH<sub>Ar</sub>), 120.5 (CH<sub>Ar</sub>), 115.3 (C<sub>Ar</sub>), 113.9 (2xCH<sub>Ar</sub>), 108.8 (CH<sub>Ar</sub>), 98.8 (CH<sub>Ar</sub>), 83.9 (C≡C), 83.5 (C≡C), 65.6 (CHOH), 55.3 (OCH<sub>3</sub>), 30.2 (NCH<sub>3</sub>), 27.7 (CH<sub>2</sub>), 21.3 (CCH<sub>3</sub>); IR (CHCl<sub>3</sub>): ν = 2922 (Ar), 1503 (C-OH), 1207 (C-H) cm<sup>-1</sup>; HRMS (ES): calcd for C<sub>21</sub>H<sub>22</sub>NO<sub>2</sub> [*M* + H]<sup>+</sup>: 320.16451; found: 320.16607.

**1-(1,5-Dimethyl-1*H*-indol-2-yl)-4-phenylbut-3-yn-1-ol 5c.** From 90 mg (0.42 mmol) of alkyne **5b**, and after flash chromatography of the residue using *n*-hexane/ethyl acetate (3:1) as eluent gave compound **5c** (80 mg, 66%) as a yellow oil; <sup>1</sup>H NMR (300 MHz, CDCl<sub>3</sub>): δ = 7.42-7.36 (3H, m, CH<sub>Ar</sub>), 7.27-7.15 (4H, m, CH<sub>Ar</sub>), 7.04 (1H, d, *J* = 8.4 Hz, CH<sub>Ar</sub>), 6.47 (1H, s, CH<sub>Ar</sub>), 5.04 (1H, t, *J* = 6.2 Hz, CHOH), 3.75 (3H, s, NCH<sub>3</sub>), 3.09 (2H, d, *J* = 5.8 Hz, CH<sub>2</sub>), 2.43 (3H, s, CCH<sub>3</sub>); <sup>13</sup>C NMR (75 MHz, CDCl<sub>3</sub>): δ = 139.9 (C<sub>Ar</sub>), 136.3 (C<sub>Ar</sub>), 131.7 (2xCH<sub>Ar</sub>), 128.7 (C<sub>Ar</sub>), 128.2 (2xCH<sub>Ar</sub>), 128.0 (CH<sub>Ar</sub>), 127.2 (C<sub>Ar</sub>), 123.6 (CH<sub>Ar</sub>), 123.1 (C<sub>Ar</sub>), 120.5 (CH<sub>Ar</sub>), 108.8 (CH<sub>Ar</sub>), 98.8 (CH<sub>Ar</sub>), 85.5 (C≡C),

83.6 (C≡C), 65.5 (CHOH), 30.1 (NCH<sub>3</sub>), 27.6 (CH<sub>2</sub>), 21.3 (CCH<sub>3</sub>); IR (CHCl<sub>3</sub>):  $\nu$  = 2920 (Ar), 1489 (C-OH) cm<sup>-1</sup>; HRMS (ES): calcd for C<sub>20</sub>H<sub>20</sub>NO [ $M + H$ ]<sup>+</sup>: 290.15290; found: 290.15394.

**4-(2,4-Dimethoxyphenyl)-1-(1,5-dimethyl-1*H*-indol-2-yl)but-3-yn-1-ol 5d.** From 120 mg (0.56 mmol) of alkyne **5b**, and after flash chromatography of the residue using *n*-hexane/ethyl acetate (3:1) as eluent gave compound **5d** (73 mg, 37%) as a yellow oil; <sup>1</sup>H NMR (300 MHz, CDCl<sub>3</sub>):  $\delta$  = 7.40 (1H, brs, CH<sub>Ar</sub>), 7.34–7.29 (1H, m, CH<sub>Ar</sub>), 7.22 (1H, d,  $J$  = 8.4 Hz, CH<sub>Ar</sub>), 7.07 (1H, d,  $J$  = 8.4 Hz, CH<sub>Ar</sub>), 6.53 (1H, brs, CH<sub>Ar</sub>), 6.46–6.43 (2H, m, CH<sub>Ar</sub>), 5.11 (1H, t,  $J$  = 6.1 Hz, CHOH), 3.85 (3H, s, NCH<sub>3</sub>), 3.82 (6H, s, 2xOCH<sub>3</sub>), 3.20–3.15 (2H, m, CH<sub>2</sub>), 2.92 (1H, brs, OH), 2.47 (3H, s, CCH<sub>3</sub>); <sup>13</sup>C NMR (75 MHz, CDCl<sub>3</sub>):  $\delta$  = 161.3 (C<sub>Ar</sub>), 160.9 (C<sub>Ar</sub>), 140.0 (C<sub>Ar</sub>), 136.3 (C<sub>Ar</sub>), 133.8 (CH<sub>Ar</sub>), 128.6 (C<sub>Ar</sub>), 127.3 (C<sub>Ar</sub>), 123.4 (CH<sub>Ar</sub>), 120.4 (CH<sub>Ar</sub>), 108.7 (CH<sub>Ar</sub>), 104.7 (C<sub>Ar</sub>), 104.6 (CH<sub>Ar</sub>), 98.8 (CH<sub>Ar</sub>), 98.3 (CH<sub>Ar</sub>), 88.3 (C≡C), 80.1 (C≡C), 65.4 (CHOH), 55.7 (OCH<sub>3</sub>), 55.3 (OCH<sub>3</sub>), 30.1 (NCH<sub>3</sub>), 28.0 (CH<sub>2</sub>), 21.3 (CCH<sub>3</sub>); IR (CHCl<sub>3</sub>):  $\nu$  = 2920 (Ar), 1210 (C-O) cm<sup>-1</sup>; HRMS (ES): calcd for C<sub>22</sub>H<sub>24</sub>NO<sub>3</sub> [ $M + H$ ]<sup>+</sup>: 350.17507; found: 350.17672.

**1-(1,5-Dimethyl-1*H*-indol-2-yl)-4-(thiophen-2-yl)but-3-yn-1-ol 5e.** From 150 mg (0.7 mmol) of the alkyne **5b**, and after flash chromatography of the residue using *n*-hexane/ethyl acetate (3:1) as eluent gave compound **5e** (191 mg, 92%) as a yellow oil; <sup>1</sup>H NMR (300 MHz, CDCl<sub>3</sub>):  $\delta$  = 7.40 (1H, brs, CH<sub>Ar</sub>), 7.24–7.17 (3H, m, CH<sub>Ar</sub>), 7.08 (1H, d,  $J$  = 8.4 Hz, CH<sub>Ar</sub>), 6.96 (1H, dd,  $J$  = 5.0, 3.8 Hz, CH<sub>Ar</sub>), 6.50 (1H, brs, CH<sub>Ar</sub>), 5.13–5.11 (1H, m, CHOH), 3.83 (3H, s, NCH<sub>3</sub>), 3.19–3.16 (2H, m, CH<sub>2</sub>), 2.46 (3H, s, CCH<sub>3</sub>), 2.30 (1H, brs, OH); <sup>13</sup>C NMR (75 MHz, CDCl<sub>3</sub>):  $\delta$  = 139.8 (C<sub>Ar</sub>), 136.4 (C<sub>Ar</sub>), 131.8 (CH<sub>Ar</sub>), 128.8 (C<sub>Ar</sub>), 127.2 (C<sub>Ar</sub>), 126.8 (CH<sub>Ar</sub>), 126.6 (CH<sub>Ar</sub>), 123.7 (CH<sub>Ar</sub>), 123.3 (C<sub>Ar</sub>), 120.5 (CH<sub>Ar</sub>), 108.8 (CH<sub>Ar</sub>), 98.8 (CH<sub>Ar</sub>), 89.7 (C≡C), 76.7 (C≡C), 65.4 (CHOH), 30.2 (NCH<sub>3</sub>), 27.9 (CH<sub>2</sub>), 21.4 (CCH<sub>3</sub>); IR (CHCl<sub>3</sub>):  $\nu$  = 2920 (Ar) cm<sup>-1</sup>; HRMS (ES): calcd for C<sub>18</sub>H<sub>18</sub>NOS [ $M + H$ ]<sup>+</sup>: 296.11036; found: 296.11007.



**1-(1-Methyl-1*H*-indol-2-yl)-4-(thiophen-2-yl)but-3-yn-1-ol 5f.** From 80 mg (0.4 mmol) of the corresponding alkyne, and after flash chromatography of the residue using *n*-hexane/ethyl acetate (3:1) as eluent gave compound **5f** (38 mg, 34%) as a yellow oil; <sup>1</sup>H NMR (300 MHz, CDCl<sub>3</sub>): δ = 7.74 (1H, d, *J* = 7.9 Hz, CH<sub>Ar</sub>), 7.50–7.19 (5H, m, CH<sub>Ar</sub>), 7.07 (1H, dd, *J* = 5.1, 3.7 Hz, CH<sub>Ar</sub>), 6.68 (1H, s, CH<sub>Ar</sub>), 5.21 (1H, brs, CHOH), 3.91 (3H, s, NCH<sub>3</sub>), 3.28–3.26 (2H, m, CH<sub>2</sub>), 2.57 (1H, brs, OH); <sup>13</sup>C NMR (75 MHz, CDCl<sub>3</sub>): δ = 139.8 (C<sub>Ar</sub>), 137.9 (C<sub>Ar</sub>), 131.8 (CH<sub>Ar</sub>), 127.0 (C<sub>Ar</sub>), 126.8 (CH<sub>Ar</sub>), 126.6 (CH<sub>Ar</sub>), 123.1 (C<sub>Ar</sub>), 122.0 (CH<sub>Ar</sub>), 120.9 (CH<sub>Ar</sub>), 119.6 (CH<sub>Ar</sub>), 109.1 (CH<sub>Ar</sub>), 99.4 (CH<sub>Ar</sub>), 89.6 (C≡C), 76.8 (C≡C), 65.4 (CHOH), 30.2 (NCH<sub>3</sub>), 27.9 (CH<sub>2</sub>).; IR (CHCl<sub>3</sub>): ν = 2921 (Ar) cm<sup>-1</sup>; HRMS (ES): calcd for C<sub>17</sub>H<sub>16</sub>NOS [*M* + H]<sup>+</sup>: 282.09471; found: 282.09604.

**4-(4-Methoxyphenyl)-1-(1-methyl-1*H*-indol-2-yl)but-3-yn-1-ol 5g.** Described in J. Wang, H.-T. Zhu, Y.-F. Qiu, Y. Niu, S. Chen, Y.-X. Li, X.-Y. Liu, *Org. Lett.* **2015**, *17*, 3186.

**1-(3-Iodo-1-methyl-1*H*-indol-2-yl)-4(4-methoxyphenyl)but-3-yn-1-ol 5g-I.** From 50 mg (0.154 mmol) of the corresponding alkyne, and after flash chromatography of the residue using *n*-hexane/ethyl acetate (3:1) as eluent gave compound **5g-I** (35 mg, 54%) as a yellow oil. <sup>1</sup>H NMR (300 MHz, CDCl<sub>3</sub>): δ = 7.64–7.61 (1H, m, H<sub>Ar</sub>), 7.37–7.32 (2H, AA'XX', 2 CH<sub>ArPMP</sub>), 7.20–7.13 (1H, m, H<sub>Ar</sub>), 6.91–6.88 (2H, m, H<sub>Ar</sub>), 6.57–6.53 (2H, AA'XX', 2 CH<sub>ArPMP</sub>), 5.35 (1H, t, *J* = 7.2 Hz, CH-OH), 3.34 (3H, s, O-CH<sub>3</sub>), 3.15 (3H, s, N-CH<sub>3</sub>), 2.91–2.72 (2H, m, CH<sub>2</sub>); <sup>13</sup>C NMR (75 MHz, CDCl<sub>3</sub>): δ = 160.4 (C<sub>Ar</sub>), 139.7 (C<sub>Ar</sub>), 139.3 (C<sub>Ar</sub>), 134.1 (2xCH<sub>Ar</sub>), 131.0 (C<sub>Ar</sub>), 123.9 (CH<sub>Ar</sub>), 122.5 (CH<sub>Ar</sub>), 121.5 (CH<sub>Ar</sub>), 116.7 (C<sub>Ar</sub>), 114.9 (2xCH<sub>Ar</sub>), 110.3 (CH<sub>Ar</sub>), 84.8 (C≡), 84.2 (C≡), 69.7 (CH-OH), 55.3 (O-CH<sub>3</sub>), 31.8 (N-CH<sub>3</sub>), 28.7 (CH<sub>2</sub>).

**4-(2,4-Dimethoxyphenyl)-1-(1-methyl-1*H*-indol-2-yl)but-3-yn-1-ol 5h.** From 190 mg (0.95 mmol) of the corresponding alkyne, and after flash chromatography of the residue using *n*-hexane/ethyl acetate (3:1) as eluent gave compound **5h** (160 mg, 47%) as yellow solid; mp 123.9–125.4 °C; <sup>1</sup>H NMR (300 MHz, CDCl<sub>3</sub>): δ = 7.62 (1H, d, *J* = 7.8 Hz, CH<sub>Ar</sub>), 7.37–7.20 (3H, m, CH<sub>Ar</sub>),

7.14–7.08 (1H, m, CH<sub>Ar</sub>), 6.62 (1H, s, CH<sub>Ar</sub>), 6.46–6.43 (2H, m, CH<sub>Ar</sub>), 5.14 (1H, t,  $J = 3.3$  Hz, CHOH), 3.86 (3H, s, OCH<sub>3</sub>), 3.85 (3H, s, OCH<sub>3</sub>), 3.82 (3H, s, NCH<sub>3</sub>), 3.27–3.10 (2H, m, CH<sub>2</sub>), 2.88 (1H, brs, OH); <sup>13</sup>C NMR (75 MHz, CDCl<sub>3</sub>):  $\delta = 161.3$  (C<sub>Ar</sub>), 160.9 (C<sub>Ar</sub>), 139.9 (C<sub>Ar</sub>), 137.9 (C<sub>Ar</sub>), 133.8 (C<sub>Ar</sub>), 127.1 (C<sub>Ar</sub>), 121.8 (C<sub>Ar</sub>), 120.8 (C<sub>Ar</sub>), 119.5 (C<sub>Ar</sub>), 109.1 (C<sub>Ar</sub>), 104.7 (C<sub>Ar</sub>), 104.6 (C<sub>Ar</sub>), 99.4 (C<sub>Ar</sub>), 98.3 (C<sub>Ar</sub>), 88.2 (C≡C), 80.2 (C≡C), 65.3 (CHOH), 55.7 (OCH<sub>3</sub>), 55.4 (OCH<sub>3</sub>), 30.1 (NCH<sub>3</sub>), 27.9 (CH<sub>2</sub>); IR (CHCl<sub>3</sub>):  $\nu = 2919$  (Ar), 1210 (C-H) cm<sup>-1</sup>; HRMS (ES): calcd for C<sub>21</sub>H<sub>22</sub>NO<sub>3</sub> [ $M + H$ ]<sup>+</sup>: 335.15942; found: 336.15826.

**1-(5-Methoxy-1-methyl-1*H*-indol-2-yl)-4-(4-methoxyphenyl)but-3-yn-1-ol 5i.** From 138 mg (0.6 mmol) of alkyne **I**, and after flash chromatography of the residue using *n*-hexane/ethyl acetate (3:1) as eluent gave compound **5i** (147 mg, 73%) as a yellow oil; <sup>1</sup>H NMR (300 MHz, CDCl<sub>3</sub>):  $\delta = 7.36$  (2H, AA'XX', 2CH<sub>Ar</sub>PMP), 7.22 (1H, d,  $J = 9.0$  Hz, CH<sub>Ar</sub>), 7.08–7.07 (1H, m, CH<sub>Ar</sub>), 6.91 (1H, dd,  $J = 8.9, 2.4$  Hz, CH<sub>Ar</sub>), 6.83 (2H, AA'XX', 2CH<sub>Ar</sub>PMP), 6.52 (1H, brs, CH<sub>Ar</sub>), 5.09 (1H, s, CHOH), 3.86 (3H, s, NCH<sub>3</sub>), 3.82 (3H, s, OCH<sub>3</sub>), 3.81 (3H, s, CH<sub>3</sub>), 3.14–3.12 (2H, m, CH<sub>2</sub>), 2.45 (1H, brs, OH); <sup>13</sup>C NMR (75 MHz, CDCl<sub>3</sub>):  $\delta = 159.4$  (C<sub>Ar</sub>), 154.1 (C<sub>Ar</sub>), 140.5 (C<sub>Ar</sub>), 133.2 (C<sub>Ar</sub>), 133.1 (2xCH<sub>Ar</sub>), 127.3 (C<sub>Ar</sub>), 115.1 (C<sub>Ar</sub>), 113.8 (2xCH<sub>Ar</sub>), 112.2 (CH<sub>Ar</sub>), 109.9 (CH<sub>Ar</sub>), 102.4 (CH<sub>Ar</sub>), 98.9 (CH<sub>Ar</sub>), 83.9 (C≡C), 83.5 (C≡C), 65.5 (CHOH), 55.8 (OCH<sub>3</sub>), 55.2 (OCH<sub>3</sub>), 30.3 (NCH<sub>3</sub>), 27.6 (CH<sub>2</sub>); IR (CHCl<sub>3</sub>):  $\nu = 2928$  (Ar), 1575 (C-O), 1290 (C-O) cm<sup>-1</sup>; HRMS (ES): calcd for C<sub>21</sub>H<sub>22</sub>NO<sub>3</sub> [ $M + H$ ]<sup>+</sup>: 336.15942; found: 336.15825.

**4-(2,4-Dimethoxyphenyl)-1-(5-methoxy-1-methyl-1*H*-indol-2-yl)but-3-yn-1-ol 5j.** From 115 mg (0.51 mmol) of alkyne **I**, and after flash chromatography of the residue using *n*-hexane/ethyl acetate (3:1) as eluent gave compound **5j** (115 mg, 63%) as a yellow oil; <sup>1</sup>H NMR (300 MHz, CDCl<sub>3</sub>):  $\delta = 7.31$  (1H, d,  $J = 9.1$  Hz, CH<sub>Ar</sub>), 7.21 (1H, d,  $J = 8.9$  Hz, CH<sub>Ar</sub>), 7.07 (1H, d,  $J = 2.3$  Hz, CH<sub>Ar</sub>), 6.90 (1H, dd,  $J = 8.9, 2.4$  Hz, CH<sub>Ar</sub>), 6.52 (1H, s, CH<sub>Ar</sub>), 6.45–6.42 (2H, m, CH<sub>Ar</sub>), 5.10 (1H, t,  $J = 6.1$  Hz, CHOH), 3.85 (3H, s, OCH<sub>3</sub>), 3.84 (3H, s, OCH<sub>3</sub>), 3.82 (3H, s, OCH<sub>3</sub>), 3.81 (3H, s, NCH<sub>3</sub>), 3.16 (2H,

t,  $J = 6.4$  Hz, CH<sub>2</sub>), 2.91 (1H, brs, OH); <sup>13</sup>C NMR (75 MHz, CDCl<sub>3</sub>):  $\delta = 161.2$  (C<sub>Ar</sub>), 160.9 (C<sub>Ar</sub>), 154.0 (C<sub>Ar</sub>), 140.5 (C<sub>Ar</sub>), 133.8 (CH<sub>Ar</sub>), 133.2 (C<sub>Ar</sub>), 127.3 (C<sub>Ar</sub>), 112.0 (CH<sub>Ar</sub>), 109.8 (CH<sub>Ar</sub>), 104.7 (C<sub>Ar</sub>), 104.6 (CH<sub>Ar</sub>), 102.4 (CH<sub>Ar</sub>), 98.9 (CH<sub>Ar</sub>), 98.3 (CH<sub>Ar</sub>), 88.2 (C $\equiv$ C), 80.1 (C $\equiv$ C), 65.3 (CHOH), 55.8 (OCH<sub>3</sub>), 55.7 (OCH<sub>3</sub>) 55.4 (OCH<sub>3</sub>), 30.2 (NCH<sub>3</sub>), 28.0 (CH<sub>2</sub>); IR (CHCl<sub>3</sub>):  $\nu = 2996$  (Ar), 1485 (C-O), 1245 (C-O) cm<sup>-1</sup>; HRMS (ES): calcd for C<sub>22</sub>H<sub>24</sub>NO<sub>4</sub> [ $M + H$ ]<sup>+</sup>: 366.16998; found: 366.17012.

**1-(5-Chloro-1-methyl-1*H*-indol-2-yl)-4-(4-methoxyphenyl)but-3-yn-1-ol 5k.** From 250 mg (1.07 mmol) of alkyne **II**, and after flash chromatography of the residue using *n*-hexane/ethyl acetate (3:1) as eluent gave compound **5k** (150 mg, 41%) as a yellow oil; <sup>1</sup>H NMR (300 MHz, CDCl<sub>3</sub>):  $\delta = 7.57$ – $7.56$  (1H, m, CH<sub>Ar</sub>), 7.35 (2H, AA'XX' 2CH<sub>Ar</sub> PMP), 7.22– $7.16$  (2H, m, CH<sub>Ar</sub>), 6.80 (2H, AA'XX' 2CH<sub>Ar</sub> PMP), 6.54 (1H, brs, CH<sub>Ar</sub>), 5.09 (1H, d,  $J = 5.3$  Hz, CHOH), 3.83 (3H, s, OCH<sub>3</sub>), 3.81 (3H, s, NCH<sub>3</sub>), 3.15– $3.12$  (2H, m, CH<sub>2</sub>); <sup>13</sup>C NMR (75 MHz, CDCl<sub>3</sub>):  $\delta = 159.5$  (C<sub>Ar</sub>), 141.2 (C<sub>Ar</sub>), 136.3 (C<sub>Ar</sub>), 133.1 (2xCH<sub>Ar</sub>), 128.0 (C<sub>Ar</sub>), 125.2 (C<sub>Ar</sub>), 122.2 (CH<sub>Ar</sub>), 120.2 (CH<sub>Ar</sub>), 115.0 (C<sub>Ar</sub>), 113.9 (2xCH<sub>Ar</sub>), 110.1 (CH<sub>Ar</sub>), 99.0 (CH<sub>Ar</sub>), 83.8 (C $\equiv$ C), 83.5 (C $\equiv$ C), 65.4 (CHOH), 55.3 (OCH<sub>3</sub>), 30.4 (NCH<sub>3</sub>), 27.6 (s, CH<sub>2</sub>); IR (CHCl<sub>3</sub>):  $\nu = 2925$  (Ar), 1256 (C-O) cm<sup>-1</sup>; HRMS (ES): calcd for C<sub>20</sub>H<sub>19</sub>ClNO<sub>2</sub> [ $M + H$ ]<sup>+</sup>: 340.10988; found: 340.10950.

**1-(5-Chloro-1-methyl-1*H*-indol-2-yl)-4-(2,4-dimethoxyphenyl)but-3-yn-1-ol 5l.** From 250 mg (1.07 mmol) of alkyne **II**, and after flash chromatography of the residue using *n*-hexane/ethyl acetate (3:1) as eluent gave compound **5l** (108 mg, 27%) as a yellow oil; <sup>1</sup>H NMR (300 MHz, CDCl<sub>3</sub>):  $\delta = 7.55$  (1H, d,  $J = 1.6$  Hz, CH<sub>Ar</sub>), 7.31– $7.15$  (3H, m, CH<sub>Ar</sub>), 6.55 (1H, s, CH<sub>Ar</sub>), 6.45– $6.42$  (2H, m, CH<sub>Ar</sub>), 5.10 (1H, brs, CHOH), 3.84 (3H, s, OCH<sub>3</sub>), 3.83 (3H, s, OCH<sub>3</sub>), 3.82 (3H, s, NCH<sub>3</sub>), 3.16 (2H, dd,  $J = 6.1, 4.9$  Hz, CH<sub>2</sub>); <sup>13</sup>C NMR (75 MHz, CDCl<sub>3</sub>):  $\delta = 161.3$  (C<sub>Ar</sub>), 161.0 (C<sub>Ar</sub>) 141.3 (C<sub>Ar</sub>), 136.3 (C<sub>Ar</sub>), 133.8 (CH<sub>Ar</sub>), 128.0 (C<sub>Ar</sub>), 125.1 (C<sub>Ar</sub>), 122.1 (CH<sub>Ar</sub>), 120.1 (CH<sub>Ar</sub>), 110.1 (CH<sub>Ar</sub>), 104.6 (CH<sub>Ar</sub>), 104.5 (C<sub>Ar</sub>), 99.1 (CH<sub>Ar</sub>), 98.3 (CH<sub>Ar</sub>), 87.8 (C $\equiv$ C), 80.5 (C $\equiv$ C), 65.2 (CHOH), 55.8 (OCH<sub>3</sub>), 55.4 (OCH<sub>3</sub>), 30.4 (NCH<sub>3</sub>), 28.0 (CH<sub>2</sub>); IR (CHCl<sub>3</sub>):  $\nu = 1037$  (Ar) cm<sup>-1</sup>; HRMS (ES): calcd for C<sub>21</sub>H<sub>21</sub>ClNO<sub>3</sub> [ $M + H$ ]<sup>+</sup>: 370.12045; found: 370.12225.

**4-(2,4-Dimethoxyphenyl)-1-(1,5-dimethyl-1*H*-indol-2-yl)-2-methylbut-3-yn-1-ol 5m.** From 165 mg (0.72 mmol) of alkyne **5b**, and after flash chromatography of the residue using *n*-hexane/ethyl acetate (3:1) as eluent gave compound **5m** (168 mg, 64%) as a yellow oil; <sup>1</sup>H NMR (300 MHz, CDCl<sub>3</sub>): δ = 7.28 (1H, s, CH<sub>Ar</sub>, M+m), 7.23-7.20 (0.6H, m, CH<sub>Ar</sub>, M), 7.14-7.08 (1.4H, m, CH<sub>Ar</sub>, M+m), 6.96-6.93 (1H, dd, *J* = 8.4, 1.7 Hz, CH<sub>Ar</sub>, M+m), 6.60 (0.4H, s, CH<sub>Ar</sub>, m), 6.43 (0.6H, s, CH<sub>Ar</sub>, M), 6.35-6.28 (2H, m, CH<sub>Ar</sub>, M+m), 4.83 (0.4H, d, *J* = 6.1 Hz, CHOH, m), 4.64 (0.6H, d, *J* = 6.7 Hz, CHOH, M), 3.74 (1.7H, s, CH<sub>3</sub>, M+m), 3.72 (1.6H, s, CH<sub>3</sub>, M+m), 3.70 (1.8H, s, CH<sub>3</sub>, M+m), 3.68 (1.4H, s, CH<sub>3</sub>, M+m), 3.65 (2.5H, s, CH<sub>3</sub>, M+m), 3.31-3.17 (1H, m, CHCH<sub>3</sub>, M+m), 2.35 (3H, s, CCH<sub>3</sub>, M+m), 1.27 (1.3H, d, *J* = 7.02 Hz, CCH<sub>3</sub>, m), 1.23 (1.7H, d, *J* = 6.9 Hz, CCH<sub>3</sub>, M); <sup>13</sup>C NMR (75 MHz, CDCl<sub>3</sub>): δ = 161.3 (C<sub>Ar</sub>, M), 161.2 (C<sub>Ar</sub>, m), 160.9 (C<sub>Ar</sub>, M), 160.7 (C<sub>Ar</sub>, m), 139.8 (C<sub>Ar</sub>, m), 139.0 (C<sub>Ar</sub>, M), 136.4 (C<sub>Ar</sub>, M), 136.0 (C<sub>Ar</sub>, m), 133.8 (CH<sub>Ar</sub>, m), 133.4 (CH<sub>Ar</sub>, M), 128.5 (C<sub>Ar</sub>, M+m), 127.5 (C<sub>Ar</sub>, m), 127.4 (C<sub>Ar</sub>, M), 123.2 (CH<sub>Ar</sub>, M), 123.1 (CH<sub>Ar</sub>, m), 120.3 (CH<sub>Ar</sub>, m), 120.3 (CH<sub>Ar</sub>, M), 108.7 (CH<sub>Ar</sub>, M+m), 104.9 (C<sub>Ar</sub>, m), 104.6 (C<sub>Ar</sub>, M), 104.6 (CH<sub>Ar</sub>, M), 104.5 (CH<sub>Ar</sub>, m), 100.1 (CH<sub>Ar</sub>, M), 99.6 (CH<sub>Ar</sub>, m), 98.3 (CH<sub>Ar</sub>, M+m), 93.3 (C≡C, m), 93.2 (C≡C, M), 80.5 (C≡C, M), 79.5 (C≡C, m), 70.9 (CHOH, M), 69.9 (CHOH, m), 55.7 (OCH<sub>3</sub>, M), 55.6 (OCH<sub>3</sub>, m), 55.4 (OCH<sub>3</sub>, M), 55.3 (OCH<sub>3</sub>, m), 34.0 (NCH<sub>3</sub>, M), 33.8 (NCH<sub>3</sub>, m), 30.3 (CHCH<sub>3</sub>, M), 30.2 (CHCH<sub>3</sub>, m), 21.3 (2 x CCH<sub>3</sub>, M+m), 18.1 (CHCH<sub>3</sub>, M), 16.7 (CHCH<sub>3</sub>, m); IR (CHCl<sub>3</sub>): ν = 1210 (C-O), 1034 (Ar) cm<sup>-1</sup>; HRMS (ES): calcd for C<sub>23</sub>H<sub>26</sub>NO<sub>3</sub> [*M* + H]<sup>+</sup>: 364.19072; found: 364.19049.

***tert*-Butyl 2-(1-hydroxy-4-(4-methoxyphenyl)but-3-yn-1-yl)-1*H*-indole-1-carboxylate 5n.** From *tert*-butyl 2-(1-hydroxybut-3-yn-1-yl)-1*H*-indole-1-carboxylate **IV** (856 mg, 3.00 mmol) and *p*-iodoanisole (702 mg, 3.0 mmol), this compound was obtained in 61% yield (721 mg, 1.84 mmol) as a yellow oil after column chromatography on silica gel (EtOAc/hexane = 1 : 6). <sup>1</sup>H NMR (400 MHz, CDCl<sub>3</sub>): δ = 8.00 (1H, dd, *J* = 8.0, 0.8 Hz), 7.53 (1H, dd, *J* = 8.0, 0.8 Hz), 7.31-7.20 (4H, m), 6.78-6.75 (3H, m), 5.35 (1H, dd, *J* = 6.8, 6.4 Hz), 3.76 (3H, s), 3.15 (1H, dd, *J* = 16.8, 6.8 Hz), 3.06 (1H, dd, *J* = 16.8, 6.4 Hz), 1.72 (9H, s); <sup>13</sup>C NMR (100 MHz, CDCl<sub>3</sub>): δ = 159.2, 151.2, 141.9, 136.4,

133.0, 128.9, 124.4, 123.1, 120.9, 115.7, 115.6, 113.8, 108.5, 85.2, 84.6, 82.7, 66.9, 55.2, 28.2, 26.8; IR (neat):  $\nu = 3453, 2955, 1724, 110, 1334, 1245, 1165, 837, 746 \text{ cm}^{-1}$ ; HRMS (ESI-TOF): calcd for  $\text{C}_{24}\text{H}_{25}\text{NNaO}_4 [M+\text{Na}]^+$ : 414.1681; found: 414.1674.

**1,8-Bis(1-methyl-1*H*-indol-2-yl)octa-3,5-diyne-1,8-diol 5g-dimer.**  $\text{Cu}(\text{OAc})_2$  (1.4 g, 8 mmol) was added at room temperature to a solution of the alkyne **5g** (720 mg, 3.8 mmol) in  $\text{CH}_3\text{CN}$  (86 mL) and  $\text{Et}_3\text{N}$  (0.64 mL, 4.58 mmol). The reaction was stirred at 80°C room temperature for 2 hours. After disappearance of the starting material (TLC), the mixture was extracted with  $\text{AcOEt}$  ( $3 \times 25 \text{ mL}$ ) and washed with brine ( $3 \times 25 \text{ mL}$ ), dried ( $\text{MgSO}_4$ ), and concentrated under reduced pressure. Chromatography of the residue using ethyl acetate/*n*-hexane (1:2) mixtures gave 620 mg (88%) of analytically pure compound **5g-dimer**.  $^1\text{H}$  NMR (300 MHz,  $\text{CDCl}_3$ ):  $\delta = 7.60$  (2H, d,  $J = 7.8 \text{ Hz}$ ,  $\text{H}_{\text{Ar}}$ ), 7.32 (2H, d,  $J = 8.2 \text{ Hz}$ ,  $\text{H}_{\text{Ar}}$ ), 7.25-7.20 (2H, m,  $\text{H}_{\text{Ar}}$ ), 7.14-7.09 (2H, m,  $\text{H}_{\text{Ar}}$ ), 6.53 (2H, s,  $\text{H}_{\text{Ar}}$ ), 5.06 (2H, s,  $2 \times \text{CH-OH}$ ), 3.82 (6H, s,  $2 \times \text{CH}_3$ ), 3.02 (4H, d,  $J = 6.0 \text{ Hz}$ ,  $2 \times \text{CH}_2$ ), 2.17 (2H, s,  $2 \times \text{OH}$ );  $^{13}\text{C}$  NMR (75 MHz,  $\text{CDCl}_3$ ):  $\delta = 139.5$  ( $2 \times \text{C}_{\text{Ar}}$ ), 138.0 ( $2 \times \text{C}_{\text{Ar}}$ ), 127.0 ( $2 \times \text{C}_{\text{Ar}}$ ), 122.2 ( $2 \times \text{CH}_{\text{Ar}}$ ), 120.9 ( $2 \times \text{CH}_{\text{Ar}}$ ), 119.7 ( $2 \times \text{CH}_{\text{Ar}}$ ), 109.2 ( $2 \times \text{CH}_{\text{Ar}}$ ), 99.5 ( $2 \times \text{CH}_{\text{Ar}}$ ), 74.0 ( $2 \times \text{C}\equiv$ ), 68.0 ( $2 \times \text{C}\equiv$ ), 65.3 ( $2 \times \text{CH-OH}$ ), 30.1 ( $2 \times \text{CH}_3$ ), 27.4 ( $2 \times \text{CH}_2$ ); IR ( $\text{CHCl}_3$ ):  $\nu = 1469$  (C–O)  $\text{cm}^{-1}$ ; HRMS (ES): calcd for  $\text{C}_{26}\text{H}_{25}\text{N}_2\text{O}_2 [M + \text{H}]^+$ : 397.19303; found: 397.19105.

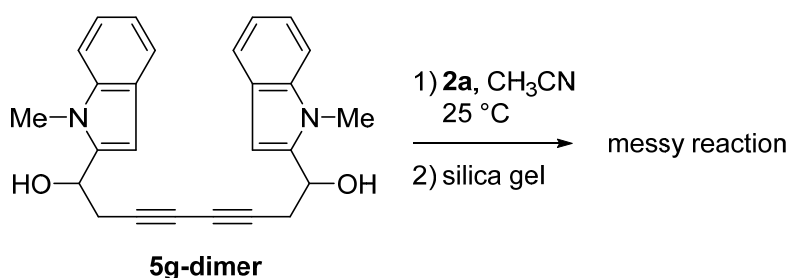

**General procedure for the reaction between alkyne 5 and pyridinium salt 2a. Preparation of bis(triflyl)indoles 7b and 7c and bis(triflyl)carbazoles 6a and 6d-m.** 2-(2-Fluoropyridin-1-ium-1-yl)-1,1-bis[(trifluoromethyl)sulfonyl]ethane **2a** (0.24 mmol, 1 equiv.) was added at room temperature to a solution of the appropriate alkyne **5** (0.24 mmol, 1 equiv.) in acetonitrile (9.8 mL). The reaction was stirred at room temperature until disappearance of the starting material (TLC). Then,

the mixture was concentrated under reduced pressure. Chromatography of the residue eluting with toluene/ethyl acetate mixtures gave analytically pure compounds. Spectroscopic and analytical data for compounds **7b**, **7c** and **6a**, **6d-m** follow.

**2-(1,5-Dimethyl-2-(1-hydroxybut-3-yn-1-yl)-1H-indol-3-yl)-1,1-**

**bis((trifluoromethyl)sulfonyl)ethan-1-ide triethylammonium salt 7b-Et<sub>3</sub>N.** From 50 mg (0.234 mmol) of indole **5b**, and after flash chromatography, with neutral silica gel, of the residue using toluene/ethyl acetate (1:1) as eluent gave compound **7b-Et<sub>3</sub>N** (61 mg, 45%) as a yellow oil. Compound **7b-Et<sub>3</sub>N** has been characterized as a triethylammonium salt (78% in <sup>1</sup>H NMR); <sup>1</sup>H NMR (300 MHz, CD<sub>3</sub>COCD<sub>3</sub>): δ = 8.00 (1H, s, CH<sub>Ar</sub>), 7.12 (1H, d, *J* = 8.3 Hz, CH<sub>Ar</sub>), 6.91 (1H, d, *J* = 8.4 Hz, CH<sub>Ar</sub>), 5.48–5.43 (1H, m, CHOH), 3.88 (2H, brs, CH<sub>2</sub>), 3.84 (3H, s, NCH<sub>3</sub>), 3.48–3.39 (5H, m, CH<sub>2</sub>), 2.94 (2H, brs, OH), 2.92–2.73 (2H, m, CH<sub>2</sub>), 2.37 (3H, s, CCH<sub>3</sub>), 2.28 (1H, brs, C≡CH), 1.39 (7H, t, *J* = 7.3 Hz, CH<sub>3</sub>); <sup>13</sup>C NMR (175 MHz, CD<sub>3</sub>COCD<sub>3</sub>): δ = 137.4 (C<sub>Ar</sub>), 137.3 (C<sub>Ar</sub>), 128.8 (C<sub>Ar</sub>), 127.4 (2xC<sub>Ar</sub>), 123.4 (CH<sub>Ar</sub>), 121.4 (CH<sub>Ar</sub>), 122.3 (q, *J* = 329.8 Hz, CF<sub>3</sub>), 122.2 (q, *J* = 325.5 Hz, CF<sub>3</sub>), 108.7 (CH<sub>Ar</sub>), 70.9 (C≡CH, CHOH), 66.2 (C≡CH), 48.0 (3 x CH<sub>2</sub>), 47.9 (CH<sub>2</sub>), 31.5 (NCH<sub>3</sub>), 23.7 (CH<sub>2</sub>), 21.8 (CCH<sub>3</sub>), 9.26 (3 x CH<sub>3</sub>); <sup>19</sup>F NMR (282 MHz, CD<sub>3</sub>COCD<sub>3</sub>): δ = –79.88 (s, 3F, CF<sub>3</sub>), –82.00 (s, 3F, CF<sub>3</sub>); IR (CHCl<sub>3</sub>): ν = 1337 (SO<sub>2</sub>), 1183 (CF<sub>3</sub>), 1044 (SO<sub>2</sub>) cm<sup>-1</sup>; HRMS (ES): calcd for C<sub>18</sub>H<sub>18</sub>F<sub>6</sub>NO<sub>5</sub>S<sub>2</sub> [*M* + H]<sup>+</sup>: 506.05251; found: 506.05347.

**2-(1,5-Dimethyl-2-(1-hydroxy-4-phenylbut-3-yn-1-yl)-1H-indol-3-yl)-1,1-**

**bis((trifluoromethyl)sulfonyl)ethan-1-ide triethylammonium salt 7c-Et<sub>3</sub>N.** From 20 mg (0.069 mmol) of indole **5c**, and after flash chromatography, with neutral silica gel, of the residue using toluene/ethyl acetate (1:1) as eluent gave compound **7c-Et<sub>3</sub>N** (35 mg, 74%) as a yellow oil. Compound **7c** has been characterized as a triethylammonium salt; <sup>1</sup>H NMR (300 MHz, CD<sub>3</sub>COCD<sub>3</sub>): δ = 8.03 (1H, s, CH<sub>Ar</sub>), 7.30–7.28 (5H, m, CH<sub>Ar</sub>), 7.12 (1H, d, *J* = 8.2 Hz, CH<sub>Ar</sub>), 6.90 (1H, d, *J* = 8.3 Hz, CH<sub>Ar</sub>), 5.59 (1H, brs, CHOH), 3.95 (2H, brs, CH<sub>2</sub>), 3.89–3.88 (3H, m, NCH<sub>3</sub>), 3.48–3.40 (6H, m, CH<sub>2</sub>), 3.14–2.98 (2H, m, CH<sub>2</sub>), 2.36 (3H, s, CCH<sub>3</sub>), 1.41–1.36 (9H, m, CH<sub>3</sub>); IR (CDCl<sub>3</sub>): ν = 1378

(SO<sub>2</sub>), 1178 (CF<sub>3</sub>) cm<sup>-1</sup>; HRMS (ES): calcd for C<sub>24</sub>H<sub>22</sub>F<sub>6</sub>NO<sub>5</sub>S<sub>2</sub> [*M* + H]<sup>+</sup>: 582.08381; found: 582.08587. Compound **7c** is unstable in solution and a good quality <sup>13</sup>C NMR spectrum cannot be recorded.

**2-(4-(4-Methoxyphenyl)-6,9-dimethyl-9H-carbazol-3-yl)-1,1-**

**bis((trifluoromethyl)sulfonyl)ethan-1-ide sodium salt 6a-Na.** From 60 mg (0.19 mmol) of indole **5a**, and after flash chromatography of the residue using toluene/ethyl acetate (2:1) as eluent gave compound **6a-Na** (65 mg, 56%) as a pink oil; <sup>1</sup>H NMR (300 MHz, CD<sub>3</sub>COCD<sub>3</sub>): δ = 8.00 (1H, d, *J* = 8.2 Hz, CH<sub>Ar</sub>), 7.88 (1H, s, CH<sub>Ar</sub>), 7.73 (1H, d, *J* = 8.2 Hz, CH<sub>Ar</sub>), 7.30 (2H, AA'XX', 2CH<sub>Ar</sub> PMP), 7.23-7.16 (2H, m, CH<sub>Ar</sub>), 7.05 (2H, AA'XX', 2CH<sub>Ar</sub> PMP), 3.89 (3H, s, OCH<sub>3</sub>), 3.61 (2H, brs, CH<sub>2</sub>), 3.13 (3H, s, NCH<sub>3</sub>), 2.48 (3H, s, CH<sub>3</sub>); <sup>13</sup>C NMR (175 MHz, CD<sub>3</sub>COCD<sub>3</sub>): δ = 160.0 (C<sub>Ar</sub>), 141.3 (C<sub>Ar</sub>), 140.0 (C<sub>Ar</sub>), 139.6 (C<sub>Ar</sub>), 132.9 (2 x CH<sub>Ar</sub>), 131.5 (C<sub>Ar</sub>), 128.3 (C<sub>Ar</sub>), 127.0 (CH<sub>Ar</sub>), 124.6 (C<sub>Ar</sub>), 123.8 (C<sub>Ar</sub>), 122.6 (q, *J*<sub>CF</sub> = 329.7 Hz, 2 x CF<sub>3</sub>), 122.0 (C<sub>Ar</sub>), 121.0 (CH<sub>Ar</sub>), 120.1 (CH<sub>Ar</sub>), 118.8 (CH<sub>Ar</sub>), 114.2 (2xCH<sub>Ar</sub>), 109.2 (CH<sub>Ar</sub>), 65.3 (CF<sub>2</sub>), 55.5 (OCH<sub>3</sub>), 32.1 (NCH<sub>3</sub>+CH<sub>2</sub>), 21.4 (CCH<sub>3</sub>); <sup>19</sup>F NMR (282 MHz, CD<sub>3</sub>COCD<sub>3</sub>): δ = -79.62 (s, 6F, 2 x CF<sub>3</sub>); <sup>23</sup>Na NMR (132 MHz, CD<sub>3</sub>COCD<sub>3</sub>): δ = -8.51 (s, Na); IR (CHCl<sub>3</sub>): ν = 1333 (SO<sub>2</sub>), 1175 (CF<sub>3</sub>), 1032 (SO<sub>2</sub>) cm<sup>-1</sup>; HRMS (ES): calcd for C<sub>25</sub>H<sub>22</sub>F<sub>6</sub>NO<sub>5</sub>S<sub>2</sub> [*M* + H]<sup>+</sup>: 594.08381; found: 594.08568.

**2-(4-(2,4-Dimethoxyphenyl)-6,9-dimethyl-9H-carbazol-3-yl)-1,1-**

**bis((trifluoromethyl)sulfonyl)ethan-1-ide triethylammonium salt 6d-Et<sub>3</sub>N (100% as triethylammonium salt by <sup>1</sup>H NMR).** From 37 mg (0.10 mmol) of indole **5d**, and after flash chromatography, with neutral silica gel, of the residue using toluene/ethyl acetate (2:1) as eluent gave compound **6d-Et<sub>3</sub>N** (41 mg, 56%) as a pink oil; <sup>1</sup>H NMR (300 MHz, CD<sub>3</sub>COCD<sub>3</sub>): δ = 7.98 (1H, d, *J* = 8.2 Hz, CH<sub>Ar</sub>), 7.87 (1H, s, CH<sub>Ar</sub>), 7.71 (1H, d, *J* = 8.2 Hz, CH<sub>Ar</sub>), 7.23-7.13 (3H, m, CH<sub>Ar</sub>), 6.71-6.63 (2H, m, CH<sub>Ar</sub>), 3.90 (3H, s, OCH<sub>3</sub>), 3.68 (3H, s, OCH<sub>3</sub>), 3.68 (1H, AB, *J* = 18.2 Hz, CH<sub>2</sub>), 3.55 (1H, AB, *J* = 18.2 Hz, CH<sub>2</sub>), 3.42 (6H, q, *J* = 7.3 Hz, CH<sub>2</sub>), 3.21 (3H, s, OCH<sub>3</sub>), 2.47 (3H, s, CCH<sub>3</sub>), 1.37 (9H, t, *J* = 7.3 Hz, CH<sub>3</sub>); <sup>13</sup>C NMR (175 MHz, CD<sub>3</sub>COCD<sub>3</sub>): δ = 161.9 (C<sub>Ar</sub>), 160.1 (C<sub>Ar</sub>), 141.2

(C<sub>Ar</sub>), 140.4 (C<sub>Ar</sub>), 140.2 (C<sub>Ar</sub>), 133.6 (CH<sub>Ar</sub>), 128.1 (CH<sub>Ar</sub>), 126.8 (C<sub>Ar</sub>), 123.9 (C<sub>Ar</sub>), 122.6 (q,  $J_{CF} = 329.5$  Hz, 2xCF<sub>3</sub>), 121.9 (C<sub>Ar</sub>), 121.0 (C<sub>Ar</sub>), 120.8 (C<sub>Ar</sub>), 120.3 (CH<sub>Ar</sub>), 120.1 (CH<sub>Ar</sub>), 118.5 (CH<sub>Ar</sub>), 109.1 (CH<sub>Ar</sub>), 105.3 (CH<sub>Ar</sub>), 99.1 (CH<sub>Ar</sub>), 65.0 (CTf<sub>2</sub>), 55.8 (OCH<sub>3</sub>), 55.6 (OCH<sub>3</sub>), 48.0 (3 x CH<sub>2</sub>), 31.8 (CH<sub>2</sub>), 31.2 (NCH<sub>3</sub>), 21.4 (CCH<sub>3</sub>), 9.3 (3 x CH<sub>3</sub>); <sup>19</sup>F NMR (282 MHz, CD<sub>3</sub>COCD<sub>3</sub>):  $\delta = -79.33$  (s, 6F, 2xCF<sub>3</sub>); IR (CHCl<sub>3</sub>):  $\nu = 1338$  (SO<sub>2</sub>), 1176 (CF<sub>3</sub>), 1034 (SO<sub>2</sub>) cm<sup>-1</sup>; HRMS (ES): calcd for C<sub>26</sub>H<sub>24</sub>F<sub>6</sub>NO<sub>6</sub>S<sub>2</sub> [ $M + H$ ]<sup>+</sup>: 624.09437; found: 624.09675.

**2-(6,9-Dimethyl-4-(thiophen-2-yl)-9H-carbazol-3-yl)-1,1-bis((trifluoromethyl)sulfonyl)ethan-1-ide sodium salt 6e-Na (100% as sodium salt, by <sup>1</sup>H NMR)** . From 65 mg (0.22 mmol) of indole **5e**, and after flash chromatography of the residue using toluene/ethyl acetate (3:1) to toluene/ethyl acetate 2:1 as eluent gave compound **6e-Na** (47 mg, 36%) as a brown oil; <sup>1</sup>H NMR (300 MHz, CD<sub>3</sub>COCD<sub>3</sub>):  $\delta = 8.07$  (1H, d,  $J = 8.2$  Hz, CH<sub>Ar</sub>), 7.90 (1H, s, CH<sub>Ar</sub>), 7.73 (1H, d,  $J = 8.2$  Hz, CH<sub>Ar</sub>), 7.64 (1H, dd,  $J = 5.3, 1.1$  Hz, CH<sub>Ar</sub>), 7.27 (1H, d,  $J = 8.3$  Hz, CH<sub>Ar</sub>), 7.23–7.21 (2H, m, CH<sub>Ar</sub>), 7.13 (1H, d,  $J = 2.8$  Hz, CH<sub>Ar</sub>), 3.74 (2H, brs, CH<sub>2</sub>), 3.29 (3H, s, NCH<sub>3</sub>), 2.48 (3H, s, CCH<sub>3</sub>); <sup>13</sup>C NMR (175 MHz, CD<sub>3</sub>COCD<sub>3</sub>):  $\delta = 141.7$  (C<sub>Ar</sub>), 141.3 (C<sub>Ar</sub>), 140.6 (C<sub>Ar</sub>), 139.7 (C<sub>Ar</sub>), 130.2 (CH<sub>Ar</sub>), 128.7 (C<sub>Ar</sub>), 127.9 (CH<sub>Ar</sub>), 127.4 (CH<sub>Ar</sub>), 127.3 (CH<sub>Ar</sub>), 123.5 (C<sub>Ar</sub>), 122.6 (q,  $J_{CF} = 330.6$  Hz, 2xCF<sub>3</sub>), 122.1 (C<sub>Ar</sub>), 120.8 (CH<sub>Ar</sub>), 120.3 (CH<sub>Ar</sub>), 120.2 (CH<sub>Ar</sub>), 116.2 (C<sub>Ar</sub>), 109.4 (CH<sub>Ar</sub>), 60.5 (C), 32.0 (CH<sub>2</sub>), 31.1 (NCH<sub>3</sub>), 21.4 (CCH<sub>3</sub>); <sup>19</sup>F NMR (282 MHz, CD<sub>3</sub>COCD<sub>3</sub>):  $\delta = -79.31$  (s, 6F, 2CF<sub>3</sub>); <sup>23</sup>Na NMR (132 MHz, CD<sub>3</sub>COCD<sub>3</sub>):  $\delta = -8.51$  (s, Na); IR (CHCl<sub>3</sub>):  $\nu = 1335$  (SO<sub>2</sub>), 1178 (CF<sub>3</sub>), 1035 (SO<sub>2</sub>) cm<sup>-1</sup>; HRMS (ES): calcd for C<sub>22</sub>H<sub>18</sub>F<sub>6</sub>NO<sub>4</sub>S<sub>3</sub> [ $M + H$ ]<sup>+</sup>: 570.02967; found: 570.03143.

**2-(9-Methyl-4-(thiophen-2-yl)-9H-carbazol-3-yl)-1,1-bis((trifluoromethyl)sulfonyl)ethan-1-ide triethylammonium salt 6f-Et<sub>3</sub>N**. From 45 mg (0.16 mmol) of indole **5f**, and after flash chromatography, with neutral silica gel, of the residue using toluene/ethyl acetate (2:1) as eluent gave compound **6f-Et<sub>3</sub>N** (44 mg, 42%) as a brown oil. Compound **6f-Et<sub>3</sub>N** has been characterized as a triethylammonium salt (88% in <sup>1</sup>H NMR); <sup>1</sup>H NMR (300 MHz, CD<sub>3</sub>COCD<sub>3</sub>):  $\delta = 8.12$  (2H, dd,  $J = 8.0, 4.3$  Hz, CH<sub>Ar</sub>), 7.76 (1H, d,  $J = 8.2$  Hz, CH<sub>Ar</sub>), 7.66 (1H, dd,  $J = 5.2, 1.1$  Hz, CH<sub>Ar</sub>), 7.39 (2H, d,



$J = 3.7$  Hz, CH<sub>Ar</sub>), 7.25–7.13 (3H, m, CH<sub>Ar</sub>), 3.76 (2H, brs, CH<sub>2</sub>), 3.44 (5H, q,  $J = 7.3$  Hz, CH<sub>2</sub>), 3.33 (3H, s, NCH<sub>3</sub>), 1.39 (8H, t,  $J = 7.3$  Hz, CH<sub>3</sub>); <sup>13</sup>C NMR (175 MHz, CD<sub>3</sub>COCD<sub>3</sub>):  $\delta = 142.9$  (C<sub>Ar</sub>), 142.0 (C<sub>Ar</sub>), 140.4 (C<sub>Ar</sub>), 139.6 (C<sub>Ar</sub>), 130.3 (CH<sub>Ar</sub>), 128.0 (CH<sub>Ar</sub>), 127.5 (CH<sub>Ar</sub>), 126.0 (CH<sub>Ar</sub>), 123.4 (C<sub>Ar</sub>), 122.6 (q,  $J_{CF} = 329.3$  Hz, 2xCF<sub>3</sub>), 122.3 (C<sub>Ar</sub>), 121.1 (CH<sub>Ar</sub>), 120.3 (CH<sub>Ar</sub>), 120.2 (CH<sub>Ar</sub>), 119.7 (CH<sub>Ar</sub>), 116.3 (C<sub>Ar</sub>), 109.6 (CH<sub>Ar</sub>), 65.1 (CTf<sub>2</sub>), 47.9 (3 x CH<sub>2</sub>), 32.1 (CH<sub>2</sub>), 31.1 (NCH<sub>3</sub>), 9.3 (3 x CH<sub>3</sub>); <sup>19</sup>F NMR (282 MHz, CD<sub>3</sub>COCD<sub>3</sub>):  $\delta = -79.30$  (s, 6F, 2xCF<sub>3</sub>); <sup>23</sup>Na NMR (132 MHz, CD<sub>3</sub>COCD<sub>3</sub>):  $\delta = -8.51$  (s, Na); IR (CHCl<sub>3</sub>):  $\nu = 1335$  (SO<sub>2</sub>), 1178 (CF<sub>3</sub>), 1035 (SO<sub>2</sub>) cm<sup>-1</sup>; HRMS (ES): calcd for C<sub>21</sub>H<sub>16</sub>F<sub>6</sub>NO<sub>4</sub>S<sub>3</sub> [ $M + H$ ]<sup>+</sup>: 556.01402; found: 556.01650.

**2-(4-(4-Methoxyphenyl)-9-methyl-9H-carbazol-3-yl)-1,1-bis((trifluoromethyl)sulfonyl)ethan-1-ide sodium salt 6g-Na.** From 30 mg (0.098 mmol) of indole **5g**, and after flash chromatography of the residue using *n*-hexane/ethyl acetate (1:1) as eluent gave compound **6g-Na** (37 mg, 63%) as a brown oil; <sup>1</sup>H NMR (500 MHz, CD<sub>3</sub>COCD<sub>3</sub>):  $\delta = 8.09$  (1H, d,  $J = 7.7$  Hz, CH<sub>Ar</sub>), 8.05 (1H, d,  $J = 8.2$  Hz, CH<sub>Ar</sub>), 7.76 (1H, d,  $J = 8.2$  Hz, CH<sub>Ar</sub>), 7.37–7.31 (4H, m, CH<sub>Ar</sub>), 7.16–7.13 (1H, m, CH<sub>Ar</sub>), 7.07–7.05 (2H, m, CH<sub>Ar</sub>), 3.90 (3H, s, OCH<sub>3</sub>), 3.62 (2H, s, CH<sub>2</sub>), 3.17 (3H, s, NCH<sub>3</sub>); <sup>13</sup>C NMR (125 MHz, CD<sub>3</sub>COCD<sub>3</sub>):  $\delta = 160.1$  (C<sub>Ar</sub>), 142.9 (C<sub>Ar</sub>), 139.8 (C<sub>Ar</sub>), 139.7 (C<sub>Ar</sub>), 133.0 (2xCH<sub>Ar</sub>), 131.5 (C<sub>Ar</sub>), 125.7 (CH<sub>Ar</sub>), 124.7 (C<sub>Ar</sub>), 123.7 (C<sub>Ar</sub>), 122.6 (q,  $J_{CF} = 329.1$  Hz, 2xCF<sub>3</sub>), 122.1 (C<sub>Ar</sub>), 121.2 (CH<sub>Ar</sub>), 120.2 (CH<sub>Ar</sub>), 119.4 (CH<sub>Ar</sub>), 118.8 (CH<sub>Ar</sub>), 114.2 (2xCH<sub>Ar</sub>), 109.5 (CH<sub>Ar</sub>), 65.3 (CTf<sub>2</sub>), 55.5 (OCH<sub>3</sub>), 32.1 (CH<sub>2</sub>), 32.0 (NCH<sub>3</sub>); <sup>19</sup>F NMR (282 MHz, CD<sub>3</sub>COCD<sub>3</sub>):  $\delta = -79.63$  (s, 6F, 2x CF<sub>3</sub>); <sup>23</sup>Na NMR (132 MHz, CD<sub>3</sub>COCD<sub>3</sub>):  $\delta = -8.40$ ; IR (CHCl<sub>3</sub>):  $\nu = 1338$  (SO<sub>2</sub>), 1185 (CF<sub>3</sub>), 1035 (SO<sub>2</sub>) cm<sup>-1</sup>; HRMS (ES): calcd for C<sub>24</sub>H<sub>20</sub>F<sub>6</sub>NO<sub>5</sub>S<sub>2</sub> [ $M + H$ ]<sup>+</sup>: 580.06816; found: 580.06858.

**2-(4-(2,4-Dimethoxyphenyl)-9-methyl-9H-carbazol-3-yl)-1,1-bis((trifluoromethyl)sulfonyl)ethan-1-ide sodium salt 6h-Na.** From 80 mg (0.24 mmol) of indole **5h**, and after flash chromatography of the residue using toluene/ethyl acetate (1:1) as eluent gave compound **6h-Na** (75 mg, 50%) as a brown oil; <sup>1</sup>H NMR (300 MHz, CD<sub>3</sub>COCD<sub>3</sub>):  $\delta = 8.08$  (1H, d,  $J = 7.7$  Hz, CH<sub>Ar</sub>), 8.02 (1H, d,  $J = 8.2$  Hz, CH<sub>Ar</sub>), 7.74 (1H, d,  $J = 8.2$  Hz, CH<sub>Ar</sub>), 7.37–7.31 (2H, m,

CH<sub>Ar</sub>), 7.17-7.10 (2H, m, CH<sub>Ar</sub>), 6.71–6.64 (2H, m, CH<sub>Ar</sub>), 3.90 (3H, s, OCH<sub>3</sub>), 3.68 (3H, s, OCH<sub>3</sub>), 3.72 (AB, *J* = 18.0 Hz, 1H, CH<sub>2</sub>), 3.59 (AB, *J* = 18.4 Hz, 1H, CH<sub>2</sub>), 3.24 (3H, s, NCH<sub>3</sub>); <sup>13</sup>C NMR (175 MHz, CD<sub>3</sub>COCD<sub>3</sub>): δ = 162.0 (C<sub>Ar</sub>), 160.1 (C<sub>Ar</sub>), 142.7 (C<sub>Ar</sub>), 140.1 (C<sub>Ar</sub>), 140.0 (C<sub>Ar</sub>), 133.6 (CH<sub>Ar</sub>), 125.5 (CH<sub>Ar</sub>), 125.4 (C<sub>Ar</sub>), 123.7 (C<sub>Ar</sub>), 122.5 (q, *J*<sub>CF</sub> = 330.7 Hz, 2xCF<sub>3</sub>), 122.0 (C<sub>Ar</sub>), 121.1 (CH<sub>Ar</sub>), 120.9 (C<sub>Ar</sub>), 120.1 (CH<sub>Ar</sub>), 119.2 (CH<sub>Ar</sub>), 118.6 (CH<sub>Ar</sub>), 109.3 (CH<sub>Ar</sub>), 105.2 (CH<sub>Ar</sub>), 99.1 (CH<sub>Ar</sub>), 64.7 (CTf<sub>2</sub>), 55.7 (OCH<sub>3</sub>), 55.6 (OCH<sub>3</sub>), 31.6 (CH<sub>2</sub>), 31.1 (NCH<sub>3</sub>); <sup>19</sup>F NMR (282 MHz, CD<sub>3</sub>COCD<sub>3</sub>): δ = -79.32 (s, 6F, 2x CF<sub>3</sub>); <sup>23</sup>Na NMR (132 MHz, CD<sub>3</sub>COCD<sub>3</sub>): δ = - 8.40; IR (CHCl<sub>3</sub>): ν = 1337 (SO<sub>2</sub>), 1195 (CF<sub>3</sub>), 1038 (SO<sub>2</sub>) cm<sup>-1</sup>; HRMS (ES): calcd for C<sub>25</sub>H<sub>22</sub>F<sub>6</sub>NO<sub>6</sub>S<sub>2</sub> [*M* + H]<sup>+</sup>: 610.07872; found: 610.07866.

#### **2-(6-Methoxy-4-(4-methoxyphenyl)-9-methyl-9*H*-carbazol-3-yl)-1,1-**

**bis((trifluoromethyl)sulfonyl)ethan-1-ide triethylammonium salt 6i-Et<sub>3</sub>N.** From 51 mg (0.15 mmol) of indole **5i**, and after flash chromatography, with neutral silica gel, of the residue using toluene/ethyl acetate (2:1) to toluene/ethyl acetate 1:1 as eluent gave compound **6i-Et<sub>3</sub>N** (32 mg, 30%) as a brown oil. Compound **6i-Et<sub>3</sub>N** has been characterized as a triethylammonium salt (56% in <sup>1</sup>H NMR); <sup>1</sup>H NMR (300 MHz, CD<sub>3</sub>COCD<sub>3</sub>): δ = 8.01 (1H, d, *J* = 8.2 Hz, CH<sub>Ar</sub>), 7.72 (1H, d, *J* = 8.2 Hz, CH<sub>Ar</sub>), 7.66 (1H, d, *J* = 2.5 Hz, CH<sub>Ar</sub>), 7.30 (2H, d, *J* = 7.1 Hz, CH<sub>Ar</sub>), 7.24 (1H, d, *J* = 8.8 Hz, CH<sub>Ar</sub>), 7.05 (2H, dd, *J* = 7.3, 1.4 Hz, CH<sub>Ar</sub>), 6.99 (1H, dd, *J* = 8.8, 2.5 Hz, CH<sub>Ar</sub>), 3.89 (3H, s, OCH<sub>3</sub>), 3.88 (3H, s, OCH<sub>3</sub>), 3.61 (2H, brs, CH<sub>2</sub>), 3.46 (3H, dd, *J* = 14.5, 7.2 Hz, CH<sub>2</sub>), 3.13 (3H, s, NCH<sub>3</sub>), 1.41 (5H, t, *J* = 7.3 Hz, CH<sub>3</sub>); <sup>13</sup>C NMR (175 MHz, CD<sub>3</sub>COCD<sub>3</sub>): δ = 160.0 (C<sub>Ar</sub>), 154.6 (C<sub>Ar</sub>), 140.2 (C<sub>Ar</sub>), 139.7 (C<sub>Ar</sub>), 137.9 (C<sub>Ar</sub>), 132.9 (2xCH<sub>Ar</sub>), 131.5 (C<sub>Ar</sub>), 124.7 (C<sub>Ar</sub>), 124.0 (C<sub>Ar</sub>), 122.6 (q, *J* = 278.4 Hz, 2xCF<sub>3</sub>), 122.1 (C<sub>Ar</sub>), 120.8 (CH<sub>Ar</sub>), 118.9 (CH<sub>Ar</sub>), 114.7 (CH<sub>Ar</sub>), 114.2 (2xCH<sub>Ar</sub>), 110.2 (CH<sub>Ar</sub>), 103.2 (CH<sub>Ar</sub>), 65.4 (CTf<sub>2</sub>), 56.1 (OCH<sub>3</sub>), 55.5 (OCH<sub>3</sub>), 47.9 (3 x CH<sub>2</sub>), 32.1 (NCH<sub>3</sub>), 32.1 (CH<sub>2</sub>), 9.2 (3 x CH<sub>3</sub>); <sup>19</sup>F NMR (282 MHz, CD<sub>3</sub>COCD<sub>3</sub>): δ = -79.30 (s, 6F, 2CF<sub>3</sub>); <sup>23</sup>Na NMR (132 MHz, CD<sub>3</sub>COCD<sub>3</sub>): δ = - 8.36 (s, Na); IR (CHCl<sub>3</sub>): ν = 1336 (SO<sub>2</sub>), 1173 (CF<sub>3</sub>), 1032 (SO<sub>2</sub>) cm<sup>-1</sup>; HRMS (ES): calcd for C<sub>25</sub>H<sub>22</sub>F<sub>6</sub>NO<sub>6</sub>S<sub>2</sub> [*M* + H]<sup>+</sup>: 610.07872; found: 610.07986.

**2-(4-(2,4-Dimethoxyphenyl)-6-methoxy-9-methyl-9H-carbazol-3-yl)-1,1-**

**bis((trifluoromethyl)sulfonyl)ethan-1-ide triethylammonium salt 6j-Et<sub>3</sub>N.** From 58 mg (0.16 mmol) of indole **5j**, and after flash chromatography, with neutral silica gel, of the residue using toluene/ethyl acetate (1:1) as eluent gave compound **6j-Et<sub>3</sub>N** (55 mg, 47%) as a brown oil. Compound **6j-Et<sub>3</sub>N** has been characterized as a triethylammonium salt (66% in <sup>1</sup>H NMR); <sup>1</sup>H NMR (300 MHz, CD<sub>3</sub>COCD<sub>3</sub>): δ = 7.99 (1H, d, *J* = 8.2 Hz, CH<sub>Ar</sub>), 7.70 (1H, d, *J* = 8.2 Hz, CH<sub>Ar</sub>), 7.65 (1H, d, *J* = 2.4 Hz, CH<sub>Ar</sub>), 7.24 (1H, d, *J* = 8.8 Hz, CH<sub>Ar</sub>), 7.14 (1H, d, *J* = 8.2 Hz, CH<sub>Ar</sub>), 6.98 (1H, dd, *J* = 8.8, 2.5 Hz, CH<sub>Ar</sub>), 6.70 (1H, d, *J* = 2.3 Hz, CH<sub>Ar</sub>), 6.65 (1H, dd, *J* = 8.2, 2.4 Hz, CH<sub>Ar</sub>), 3.89 (3H, s, OCH<sub>3</sub>), 3.88 (3H, s, OCH<sub>3</sub>), 3.68 (1H, AB, *J* = 18.0 Hz, CH<sub>2</sub>), 3.55 (1H, AB, *J* = 18.4 Hz, CH<sub>2</sub>), 3.68 (3H, s, OCH<sub>3</sub>), 3.41 (4H, q, *J* = 7.3 Hz, CH<sub>2</sub>), 3.20 (3H, s, NCH<sub>3</sub>), 1.37 (6H, t, *J* = 7.3 Hz, CH<sub>3</sub>); <sup>13</sup>C NMR (175 MHz, CD<sub>3</sub>COCD<sub>3</sub>): δ = 161.9 (C<sub>Ar</sub>), 160.1 (C<sub>Ar</sub>), 154.5 (C<sub>Ar</sub>), 140.6 (C<sub>Ar</sub>), 140.2 (C<sub>Ar</sub>), 137.8 (C<sub>Ar</sub>), 133.6 (CH<sub>Ar</sub>), 124.0 (C<sub>Ar</sub>), 122.6 (q, *J* = 329.4 Hz, 2xCF<sub>3</sub>), 122.0 (C<sub>Ar</sub>), 121.0 (C<sub>Ar</sub>), 120.6 (CH<sub>Ar</sub>), 120.3 (C<sub>Ar</sub>), 118.7 (CH<sub>Ar</sub>), 114.5 (CH<sub>Ar</sub>), 110.0 (CH<sub>Ar</sub>), 105.2 (CH<sub>Ar</sub>), 103.3 (CH<sub>Ar</sub>), 99.1 (CH<sub>Ar</sub>), 65.0 (C-Tf<sub>2</sub>), 56.1 (OCH<sub>3</sub>), 55.7 (OCH<sub>3</sub>), 55.6 (OCH<sub>3</sub>), 48.0 (3 x CH<sub>2</sub>), 31.7 (CH<sub>2</sub>), 31.2 (NCH<sub>3</sub>), 9.2 (3 x CH<sub>3</sub>); <sup>19</sup>F NMR (282 MHz, CD<sub>3</sub>COCD<sub>3</sub>): δ = -79.26 (s, 6F, 2CF<sub>3</sub>); <sup>23</sup>Na NMR (132 MHz, CD<sub>3</sub>COCD<sub>3</sub>): δ = -8.49 (s, Na); IR (CHCl<sub>3</sub>): ν = 1332 (SO<sub>2</sub>), 1170 (CF<sub>3</sub>), 1034 (SO<sub>2</sub>) cm<sup>-1</sup>; HRMS (ES): calcd for C<sub>26</sub>H<sub>24</sub>F<sub>6</sub>NO<sub>7</sub>S<sub>2</sub> [*M* + H]<sup>+</sup>: 640.08929; found: 640.08845.

**2-(6-Chloro-4-(4-methoxyphenyl)-9-methyl-9H-carbazol-3-yl)-1,1-**

**bis((trifluoromethyl)sulfonyl)ethan-1-ide triethylammonium salt 6k-Et<sub>3</sub>N.** From 65 mg (0.19 mmol) of indole **5k**, and after flash chromatography, with neutral silica gel, of the residue using toluene/ethyl acetate (1:1) as eluent gave compound **6k-Et<sub>3</sub>N** (62 mg, 45%) as a brown oil; <sup>1</sup>H NMR (300 MHz, CD<sub>3</sub>COCD<sub>3</sub>): δ = 8.12–8.08 (2H, m, CH<sub>Ar</sub>), 7.79 (1H, d, *J* = 8.3 Hz, CH<sub>Ar</sub>), 7.38–7.30 (4H, m, CH<sub>Ar</sub>), 7.06 (2H, d, *J* = 8.8 Hz, CH<sub>Ar</sub>), 3.90 (3H, s, OCH<sub>3</sub>), 3.62 (2H, s, CH<sub>2</sub>), 3.45–3.39 (6H, dd, *J* = 13.4, 6.4 Hz, CH<sub>2</sub>), 3.17 (3H, s, NCH<sub>3</sub>), 1.40 (9H, t, *J* = 7.3 Hz, CH<sub>3</sub>); <sup>13</sup>C NMR (175 MHz, CD<sub>3</sub>COCD<sub>3</sub>): δ = 160.1 (C<sub>Ar</sub>), 141.3 (C<sub>Ar</sub>), 140.9 (C<sub>Ar</sub>), 140.2 (C<sub>Ar</sub>), 132.9 (2 x CH<sub>Ar</sub>), 131.0 (C<sub>Ar</sub>),

125.4 (CH<sub>Ar</sub>), 125.0 (C<sub>Ar</sub>), 124.8 (C<sub>Ar</sub>), 124.4 (C<sub>Ar</sub>), 122.6 (q,  $J = 329.6$  Hz, 2 x CF<sub>3</sub>), 121.7 (CH<sub>Ar</sub>), 121.2 (C<sub>Ar</sub>), 119.8 (CH<sub>Ar</sub>), 119.2 (CH<sub>Ar</sub>), 114.3 (2 x CH<sub>Ar</sub>), 110.9 (CH<sub>Ar</sub>), 55.5 (OCH<sub>3</sub>), 47.8 (3 x CH<sub>2</sub>), 32.3 (NCH<sub>3</sub>), 32.2 (CH<sub>2</sub>), 9.2 (3 x CH<sub>3</sub>); <sup>19</sup>F NMR (282 MHz, CD<sub>3</sub>COCD<sub>3</sub>):  $\delta = -79.31$  (s, 6F, 2CF<sub>3</sub>); IR (CHCl<sub>3</sub>):  $\nu = 1334$  (SO<sub>2</sub>), 1174 (CF<sub>3</sub>), 1032 (SO<sub>2</sub>) cm<sup>-1</sup>; HRMS (ES): calcd for C<sub>24</sub>H<sub>19</sub>ClF<sub>6</sub>NO<sub>5</sub>S<sub>2</sub> [ $M + H$ ]<sup>+</sup>: 614.02919; found: 614.02771.

**2-(6-Chloro-4-(2,4-dimethoxyphenyl)-9-methyl-9H-carbazol-3-yl)-1,1-**

**bis((trifluoromethyl)sulfonyl)ethan-1-ide triethylammonium salt 6l-Et<sub>3</sub>N.** From 54 mg (0.15 mmol) of indole **5l**, and after flash chromatography, with neutral silica gel, of the residue using toluene/ethyl acetate (2:1 → 1:1) as eluent gave compound **6l-Et<sub>3</sub>N** (41 mg, 38%) as a brown oil. Compound **6l-Et<sub>3</sub>N** has been characterized as a triethylammonium salt (51% in <sup>1</sup>H NMR); <sup>1</sup>H NMR (300 MHz, CD<sub>3</sub>COCD<sub>3</sub>):  $\delta = 8.10$  (1H, d,  $J = 1.2$  Hz, CH<sub>Ar</sub>), 8.06 (1H, d,  $J = 8.3$  Hz, CH<sub>Ar</sub>), 7.77 (1H, d,  $J = 8.3$  Hz, CH<sub>Ar</sub>), 7.37–7.30 (2H, m, CH<sub>Ar</sub>), 7.15 (1H, d,  $J = 8.2$  Hz, CH<sub>Ar</sub>), 6.71–6.64 (2H, m, CH<sub>Ar</sub>), 3.90 (3H, s, OCH<sub>3</sub>), 3.68 (3H, s, OCH<sub>3</sub>), 3.68 (1H, AB,  $J = 18.1$  Hz, CH<sub>2</sub>), 3.55 (1H, AB,  $J = 18.3$  Hz, CH<sub>2</sub>), 3.44 (3H, q,  $J = 7.3$  Hz, CH<sub>2</sub>), 3.25 (3H, s, NCH<sub>3</sub>), 1.39 (5H, t,  $J = 7.3$  Hz, CH<sub>3</sub>); <sup>13</sup>C NMR (175 MHz, CD<sub>3</sub>COCD<sub>3</sub>):  $\delta = 162.1$  (C<sub>Ar</sub>), 160.0 (C<sub>Ar</sub>), 141.4 (C<sub>Ar</sub>), 141.1 (C<sub>Ar</sub>), 140.6 (C<sub>Ar</sub>), 133.5 (CH<sub>Ar</sub>), 125.3 (CH<sub>Ar</sub>), 124.9 (C<sub>Ar</sub>), 124.2 (C<sub>Ar</sub>), 122.6 (q,  $J = 329.2$  Hz, 2 x CF<sub>3</sub>), 121.5 (CH<sub>Ar</sub>), 121.3 (C<sub>Ar</sub>), 121.1 (C<sub>Ar</sub>), 119.7 (CH<sub>Ar</sub>, C<sub>Ar</sub>), 119.0 (CH<sub>Ar</sub>), 110.7 (CH<sub>Ar</sub>), 105.3 (CH<sub>Ar</sub>), 99.1 (CH<sub>Ar</sub>), 64.8 (CTf<sub>2</sub>), 55.8 (OCH<sub>3</sub>), 55.6 (OCH<sub>3</sub>), 48.0 (3 x CH<sub>2</sub>), 31.8 (CH<sub>2</sub>), 31.4 (NCH<sub>3</sub>), 9.3 (3 x CH<sub>3</sub>); <sup>19</sup>F NMR (282 MHz, CD<sub>3</sub>COCD<sub>3</sub>):  $\delta = -79.30$  (s, 6F, 2CF<sub>3</sub>); IR (CHCl<sub>3</sub>):  $\nu = 1334$  (SO<sub>2</sub>), 1207 (CF<sub>3</sub>), 1033 (SO<sub>2</sub>) cm<sup>-1</sup>; HRMS (ES): calcd for C<sub>25</sub>H<sub>20</sub>ClF<sub>6</sub>NNaO<sub>6</sub>S<sub>2</sub> [ $M + Na$ ]<sup>+</sup>: 666.0217; found: 666.02062.

**2-(4-(2,4-Dimethoxyphenyl)-2,6,9-trimethyl-9H-carbazol-3-yl)-1,1-**

**bis((trifluoromethyl)sulfonyl)ethan-1-ide sodium salt 6m-Na.** From 51 mg (0.14 mmol) of indole **5m**, and after flash chromatography, with neutral silica gel, of the residue using toluene/ethyl acetate (2:1) as eluent gave compound **6m-Na** (39 mg, 42%) as a yellow oil; <sup>1</sup>H NMR (700 MHz,

CD<sub>3</sub>COCD<sub>3</sub>):  $\delta$  = 7.82 (1H, s, CH<sub>Ar</sub>), 7.73 (1H, s, CH<sub>Ar</sub>), 7.49 (1H, brs, CH<sub>Ar</sub>), 7.15–7.12 (2H, m, CH<sub>Ar</sub>), 6.61–6.59 (2H, m, CH<sub>Ar</sub>), 3.88 (3H, s, OCH<sub>3</sub>), 3.82–3.73 (2H, m, CH<sub>2</sub>), 3.62 (3H, s, OCH<sub>3</sub>), 3.05 (3H, s, NCH<sub>3</sub>), 2.76 (3H, s, CCH<sub>3</sub>), 2.45 (3H, s, CCH<sub>3</sub>); <sup>13</sup>C NMR (175 MHz, CD<sub>3</sub>COCD<sub>3</sub>):  $\delta$  = 161.7 (C<sub>Ar</sub>), 160.4 (C<sub>Ar</sub>), 141.3 (C<sub>Ar</sub>), 139.5 (C<sub>Ar</sub>), 137.0 (C<sub>Ar</sub>), 135.2 (CH<sub>Ar</sub>), 130.1 (C<sub>Ar</sub>), 129.8 (C<sub>Ar</sub>), 129.0 (C<sub>Ar</sub>), 127.7 (C<sub>Ar</sub>), 126.6 (CH<sub>Ar</sub>), 123.7 (C<sub>Ar</sub>), 122.4 (q,  $J$  = 329.9 Hz, 2 x CF<sub>3</sub>), 121.0 (CH<sub>Ar</sub>), 120.8 (C<sub>Ar</sub>), 120.0 (CH<sub>Ar</sub>), 109.0 (CH<sub>Ar</sub>), 104.3 (CH<sub>Ar</sub>), 98.3 (CH<sub>Ar</sub>), 60.4 (CF<sub>2</sub>), 55.6 (OCH<sub>3</sub>), 55.5 (OCH<sub>3</sub>), 31.3 (NCH<sub>3</sub>), 30.3 (CH<sub>2</sub>), 22.1 (CCH<sub>3</sub>), 21.4 (CCH<sub>3</sub>); <sup>19</sup>F NMR (282 MHz, CD<sub>3</sub>COCD<sub>3</sub>):  $\delta$  = -79.12 (s, 6F, 2 x CF<sub>3</sub>); <sup>23</sup>Na NMR (132 MHz, CD<sub>3</sub>COCD<sub>3</sub>):  $\delta$  = - 8.39 (s, Na); IR (CHCl<sub>3</sub>):  $\nu$  = 1338 (SO<sub>2</sub>), 1159 (CF<sub>3</sub>), 1029 (SO<sub>2</sub>) cm<sup>-1</sup>; HRMS (ES): calcd for C<sub>27</sub>H<sub>26</sub>F<sub>6</sub>NO<sub>6</sub>S<sub>2</sub> [ $M + H$ ]<sup>+</sup>: 638.11002; found: 638.10932.

**tert-Butyl 3-(2,2-bis((trifluoromethyl)sulfonyl)ethyl)-4-(4-methoxyphenyl)-9H-carbazole-9-carboxylate triethylammonium salt (6n-Et<sub>3</sub>N).** From *N*-Boc-indole **5n** (97.9 mg, 0.250 mmol) and 2-fluoropyridinium salt **2a** (101 mg, 0.259 mmol), compound **6n** was obtained in 49% yield (79.3 mg, 0.103 mmol) as a yellow oil. Isolation of this compound was achieved as follows; after completed consumption of the starting indole **6n** (by TLC), Et<sub>3</sub>N (0.5 mL) was added to the reaction mixture at room temperature. The resulting mixture was concentrated under reduced pressure to give a crude material as a brown oil. Desired carbazole salt was isolated as a brown oil after removal of neutral byproducts from the crude material by pipetting technique with a mixed solvent (EtOAc/hexane = 10 : 1, 3 x 5 mL) as a washing solvent. This compound was a mixture of two rotarmers in a ratio of 1.5 : 1 in CD<sub>3</sub>CN at room temperature. <sup>1</sup>H NMR (600 MHz, CD<sub>3</sub>CN):  $\delta$  for major rotamer = 8.01-7.96 (1H, m), 7.69 (1H, d,  $J$  = 8.2 Hz), 7.52 (2H, d,  $J$  = 8.2 Hz), 7.11 (1H, brt,  $J$  = 7.1 Hz), 7.03-7.00 (1H, m), 6.93-6.87 (2H, m), 6.64 (2H, d,  $J$  = 8.8 Hz), 3.51 (3H, s), 3.38 (2H, s), 2.82-2.73 (6H, m), 0.98 (9H, s), 0.90 (9H, t,  $J$  = 7.2 Hz),  $\delta$  for minor rotamer = 7.71 (1H, d,  $J$  = 7.6 Hz), 7.58 (1H, d,  $J$  = 8.8 Hz), 7.03-7.00 (1H, m), 6.93-6.87 (2H, m), 6.80 (2H, d,  $J$  = 8.8 Hz), 6.70-6.62 (2H, m), 6.19 (1H, d,  $J$  = 7.0 Hz), 3.59 (3H, s), 3.22 (2H, s), 2.82-2.73 (6H, m), 1.43 (9H, s), 0.90 (2H, t,  $J$  = 7.2 Hz); <sup>19</sup>F

NMR (376 MHz, CD<sub>3</sub>CN):  $\delta$  for major rotamer = -80.1 (6F, s),  $\delta$  for minor rotamer = -80.2 (6F, s); <sup>13</sup>C NMR (150 MHz, CD<sub>3</sub>CN):  $\delta$  for major rotamer = 7.0, 25.7, 30.0, 45.8, 53.8, 62.7, 82.3, 112.6, 113.2, 116.9, 118.6, 120.0 (q,  $J_{CF}$  = 327 Hz), 121.5, 123.2, 123.9, 124.3, 125.5, 127.5, 129.6, 129.8, 133.6, 136.9, 138.9, 149.0, 157.6,  $\delta$  for minor rotamer = 7.0, 26.4, 29.1, 45.8, 53.9, 62.6, 82.8, 112.5, 113.3, 114.6, 120.0 (q,  $J_{CF}$  = 327 Hz), 120.4, 121.2, 122.4, 124.7, 125.2, 126.3, 129.2, 130.1, 133.7, 135.6, 137.8, 138.1, 149.9, 158.2; IR (neat):  $\nu$  = 3130, 2983, 1726, 1332, 1151, 1031, 593, 577 cm<sup>-1</sup>; HRMS (ESI-TOF): calcd for C<sub>28</sub>H<sub>24</sub>F<sub>6</sub>NO<sub>7</sub>S<sub>2</sub> [M]<sup>-</sup>: 664.0898; found: 664.0906.

**3-(2,2-Bis(trifluoromethyl)sulfonyl)ethyl)-4-(4-methoxyphenyl)-9-methyl-9H-carbazol-1-ol triethylammonium salt 8.** From 30 mg (0.07 mmol) of indole **5g-I**, and after flash chromatography, with neutral silica gel, of the residue using *n*-hexane/ethyl acetate (1:1) as eluent gave compound **8** (18 mg, 37%) as a yellow oil; <sup>1</sup>H NMR (300 MHz, CDCl<sub>3</sub>):  $\delta$  = 8.08 (1H, d,  $J$  = 1.0 Hz, H<sub>Ar</sub>), 7.75-7.69 (2H, m, H<sub>Ar</sub>), 7.56 (1H, dd,  $J$  = 8.5, 1.5 Hz, H<sub>Ar</sub>), 7.22-7.13 (2H, AA'XX', 2 CH<sub>ArPMP</sub>), 7.14 (1H, d,  $J$  = 8.5 Hz, H<sub>Ar</sub>), 7.05 – 6.96 (2H, AA'XX', 2 CH<sub>ArPMP</sub>), 3.92 (3H, s, O-CH<sub>3</sub>), 3.98 (2H, br, CH<sub>2</sub>), 3.09-3.05 (6H, m, N-CH<sub>3</sub> + CH<sub>3</sub> Et<sub>3</sub>N), 1.24 (6H, t,  $J$  = 6.3 Hz, CH<sub>2</sub> Et<sub>3</sub>N). <sup>13</sup>C NMR (100 MHz, CDCl<sub>3</sub>):  $\delta$  = 159.4 (C<sub>Ar</sub>), 140.3 (C<sub>Ar</sub>), 139.2 (C<sub>Ar</sub>), 134.9 (C<sub>Ar</sub>), 131.9 (2xCH<sub>Ar</sub>), 130.70 (d,  $J_{CF}$  = 321.6 Hz, 2xCF<sub>3</sub>), 129.2 (C<sub>Ar</sub>), 128.8 (CH<sub>Ar</sub>), 128.7 (C<sub>Ar</sub>), 127.4 (CH<sub>Ar</sub>), 123.7 (C<sub>Ar</sub>), 121.7 (C<sub>Ar</sub>), 120.7 (CH<sub>Ar</sub>), 119.8 (CH<sub>Ar</sub>), 113.4 (2xCH<sub>Ar</sub>), 108.3 (CH<sub>Ar</sub>), 99.8 (C<sub>Ar</sub>), 55.3 (O-CH<sub>3</sub>), 46.7 (CH<sub>2</sub> Et<sub>3</sub>N), 32.7 (CH<sub>2</sub>), 32.0 (N-CH<sub>3</sub>), 8.3 (CH<sub>3</sub>). <sup>19</sup>F NMR (282 MHz, CDCl<sub>3</sub>):  $\delta$  = -78.73 (s, 6F, 2 x CF<sub>3</sub>).

**1-Methoxy-4-(3-(*p*-tolylloxy)prop-1-yn-1-yl)benzene 9a.** To a solution of 1-methyl-4-(prop-2-yn-1-yloxy)benzene [L. Alonso-Marañón, M. M. Martínez, L. A. Sarandeses, J. P. Sestelo, *Org. Biomol. Chem.* **2015**, *13*, 379.] (1.47 g, 10.0 mmol) in Et<sub>3</sub>N (30 mL), (Ph<sub>3</sub>P)<sub>2</sub>PdCl<sub>2</sub> (71 mg, 0.10 mmol) and CuI (39 mg, 0.20 mmol) were added. After being stirred for 10 min at room temperature, *p*-iodoanisole (2.81 g, 12.0 mmol) was added to the reaction mixture. This mixture was stirred for additional 1 h at the same temperature, then it was poured into water (100 mL). After extraction with Et<sub>2</sub>O (3 x 25 mL) and washing the combined organic layer with 1 M hydrochloric acid (2 x 25 mL)

and brine (25 mL), the mixture was dried over anhydrous MgSO<sub>4</sub> and concentrated under reduced pressure. The resulting residue was purified by column chromatography on silica gel (EtOAc/hexane = 1 : 15) to give this compound as light brown crystals in 92% yield (2.33 g, 9.23 mmol). Mp. 111-113 °C (from EtOAc/hexane); <sup>1</sup>H NMR (400 MHz, CDCl<sub>3</sub>): δ = 7.37 (2H, brd, *J* = 8.8 Hz), 7.10 (2H, brd, *J* = 8.8 Hz), 6.93 (2H, brd, *J* = 8.8 Hz), 6.82 (2H, brd, *J* = 8.8 Hz), 4.86 (2H, s), 3.79 (3H, s), 2.29 (3H, s); <sup>13</sup>C NMR (100 MHz, CDCl<sub>3</sub>): δ = 159.9, 155.8, 133.3, 130.6, 129.9, 114.9, 114.5, 113.9, 87.0, 82.8, 57.0, 55.3, 20.5; IR (neat): ν = 2226, 1601, 1504, 1219, 1024, 830, 813, 538 cm<sup>-1</sup>; HRMS (ESI-TOF): calcd for C<sub>17</sub>H<sub>17</sub>O<sub>2</sub> [*M*+H]<sup>+</sup>: 253.1229; found: 253.1227.

**1-(But-2-yn-1-yloxy)-4-methylbenzene 9b.** To a solution of 1-methyl-4-(prop-2-yn-1-yloxy)benzene [L. Alonso-Marañón, M. M. Martínez, L. A. Sarandeses, J. P. Sestelo, *Org. Biomol. Chem.* **2015**, *13*, 379.] (733 mg, 5.01 mmol) in THF (25 mL), a 1.55 M solution of *n*-BuLi in hexane (4.8 mL, 7.5 mmol) was slowly added at -78 °C. After being stirred for 2 h at the same temperature, the reaction mixture was treated with iodomethane (0.95 mL, 15 mmol) for 1 h at room temperature. Then, the resulting mixture was quenched with a saturated solution of NH<sub>4</sub>Cl in water (25 mL), extracted with Et<sub>2</sub>O (3 x 25 mL), dried over anhydrous Na<sub>2</sub>SO<sub>4</sub>, and evaporated. Thus obtained residue was purified by column chromatography on silica gel (EtOAc/hexane = 1 : 16) to give this compound as a pale yellow oil in 91% yield (728 mg, 4.54 mmol). <sup>1</sup>H NMR (400 MHz, CDCl<sub>3</sub>): δ = 7.07 (2H, brd, *J* = 8.4 Hz), 6.86 (2H, brd, *J* = 8.4 Hz), 4.61 (2H, q, *J* = 2.4 Hz), 2.29 (2H, s), 1.85 (2H, t, *J* = 2.4 Hz); <sup>13</sup>C NMR (100 MHz, CDCl<sub>3</sub>): δ = 155.8, 130.5, 129.8, 114.7, 83.5, 74.3, 56.5, 20.5, 3.7; IR (neat): ν = 3027, 2920, 2225, 1607, 1508, 1219, 1016, 818 cm<sup>-1</sup>; HRMS (ESI-TOF): calcd for C<sub>11</sub>H<sub>13</sub>O [*M*+H]<sup>+</sup>: 161.0966; found: 161.0966.

**3-(2,2-Bis((trifluoromethyl)sulfonyl)ethyl)-4-(4-methoxyphenyl)-6-methyl-2H-chromene triethylamine salt (10a-Et<sub>3</sub>N).** From propargyl ether **8a** (63.7 mg, 0.252 mmol) and 2-fluoropyridinium salt **2a** (102 mg, 0.261 mmol), compound **10a-Et<sub>3</sub>N** was obtained in 95% yield (153 mg, 0.237 mmol) as a yellow oil. Isolation of this compound was achieved as follows; after completed

consumption of the starting ether **8a** (by TLC), Et<sub>3</sub>N (0.5 mL) was added to the reaction mixture at room temperature. The resulting mixture was concentrated under reduced pressure to give a crude material as a brown oil. Desired salt was isolated after removal of neutral compounds from this oily material by pipetting technique with hexane (5.0 mL) as a washing solvent. <sup>1</sup>H NMR (400 MHz, CDCl<sub>3</sub>):  $\delta$  = 7.13 (2H, d,  $J$  = 8.6 Hz), 6.93 (2H, d,  $J$  = 8.6 Hz), 9.83 (1H, d,  $J$  = 8.0 Hz), 6.71 (1H, d,  $J$  = 8.0 Hz), 6.36 (1H, s), 5.32 (1H, br, NH), 4.98 (2H, s), 3.85 (3H, s), 3.20 (2H, brs), 3.06 (6H, q,  $J$  = 7.2 Hz), 2.10 (3H, s), 1.28 (9H, t,  $J$  = 7.2 Hz); <sup>19</sup>F NMR (376 MHz, CD<sub>3</sub>CN):  $\delta$  = -79.7 (6F, s); <sup>13</sup>C NMR (100 MHz, CDCl<sub>3</sub>):  $\delta$  = 158.5, 151.2, 131.3, 130.4, 129.9, 129.5, 128.9, 128.2, 126.3, 125.8, 121.2 (q,  $J_{CF}$  = 327 Hz), 114.8, 113.5, 66.9, 59.9, 55.1, 46.7, 28.6, 20.6, 8.5; IR (neat):  $\nu$  = 3130, 1608, 1335, 1164, 1035, 590 cm<sup>-1</sup>; HRMS (ESI-TOF): calcd for C<sub>21</sub>H<sub>17</sub>F<sub>6</sub>O<sub>6</sub>S<sub>2</sub> [ $M$ ]<sup>-</sup>: 543.0371; found: 543.0380.

**1-(9H-Carbazol-9-yl)ethan-1-one 11b.** To a solution of 9H-carbazole (2.51 g, 15.0 mmol) and acetic anhydride (5.0 mL, 52.9 mmol) in CHCl<sub>3</sub> (25 mL), concentrated H<sub>2</sub>SO<sub>4</sub> (2 drops) was added at room temperature. After being heated for 5 h under reflux, the reaction mixture was evaporated. Thus obtained solid material was dissolved in Et<sub>2</sub>O (40 mL), then the resulting solution was washed with saturated NaHCO<sub>3</sub> aqueous solution (40 mL x 2) and water (40 mL x 2). After removal of solvents under reduced pressure, 1-(9H-carbazol-9-yl)ethan-1-one **11b** was obtained in 69% yield (2.17 g, 10.4 mmol). This material was used for further experiment without additional purification. The structure of this compound was confirmed by comparison of reported NMR data [Bjørsvik, H.-R.; Elumalai, V. *Eur. J. Org. Chem.* **2016**, 5474]. <sup>1</sup>H NMR (400 MHz, CDCl<sub>3</sub>)  $\delta$  2.90 (s, 3H), 7.37-7.43 (m, 2H), 7.49 (ddd,  $J$  = 8.4, 7.3, 1.4 Hz, 2H), 8.00 (brd,  $J$  = 7.3 Hz, 2H), 8.23 (d,  $J$  = 8.4 Hz, 2H); <sup>13</sup>C NMR (100 MHz, CDCl<sub>3</sub>)  $\delta$  27.3, 115.8, 119.4, 123.2, 125.9, 126.9, 138.1, 169.6.

### Reaction of carbazoles with Tf<sub>2</sub>C=CH<sub>2</sub>

The results for the bis(triflyl)ethylation reactions of carbazole derivatives **11** are summarized in the following figure. As mentioned in the manuscript, electron-deficient **11a** and **11b** required heating



conditions to form the products **12a** and **12b**. In particular, the reaction of *N*-acetyl substrate **11b** gave the desired product **12b** in poor yield due to notably low nucleophilicity of this starting carbazole. In the 1:1 reaction of *N*-ethyl carbazole **11c** with **2a**, the monoalkylated product **12c** was obtained in 66% yield, accompanying with formation of a considerable amount of the dialkylated product **14c**. The product **14c** was selectively formed by similar reaction using 2 equiv of **2a**.

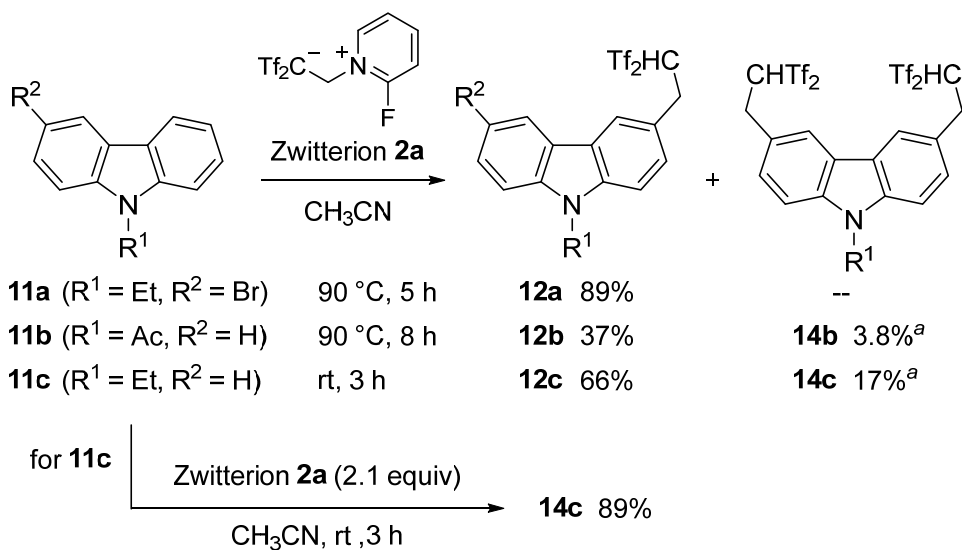

<sup>a</sup>Based on NMR data of crude materials using PhCF<sub>3</sub> as an internal standard.

**3-(2,2-Bis((trifluoromethyl)sulfonyl)ethyl)-6-bromo-9-ethyl-9*H*-carbazole 12a.** To a solution of 3-bromo-9-ethyl-9*H*-carbazole **11a** (54.5 mg, 0.199 mmol) in CH<sub>3</sub>CN (2.0 mL), 2-fluoropyridinium salt **2a** (81.8 mg, 0.210 mmol) was added at room temperature. After being stirred for 5 h at 90 °C, the reaction mixture was concentrated under reduced pressure. The resulting solid was purified by washing the crude material with hexane (2.0 mL x 3) to give **12a** in 89% yield (99.7 mg, 0.176 mmol). Greenish crystals (from CHCl<sub>3</sub>); Mp. 145-146 °C, IR (ATR)  $\nu$  2980, 2938, 1629, 1596, 1482, 1438, 1391, 1377, 1225, 1207, 1151, 1108, 1097, 867, 817, 806, 701, 644, 583, 511, 484, 459 cm<sup>-1</sup>; <sup>1</sup>H NMR (400 MHz, CDCl<sub>3</sub>)  $\delta$  1.43 (t,  $J = 7.2$  Hz, 3H), 3.99 (d,  $J = 5.7$  Hz, 2H), 4.34 (q,  $J = 7.2$  Hz, 2H), 5.16 (t,  $J = 5.7$  Hz, 1H), 7.29 (d,  $J = 8.6$  Hz, 1H), 7.37-7.43 (m, 2H), 7.58 (dd,  $J = 8.6, 1.9$  Hz, 1H), 7.98 (s, 1H), 8.21 (d,  $J = 1.9$  Hz, 1H); <sup>13</sup>C NMR (100 MHz, CDCl<sub>3</sub>)  $\delta$  13.7, 30.7, 37.8, 80.5, 109.5, 110.2, 112.0, 119.2 (q,  $J_{\text{CF}} = 330$  Hz), 121.4, 122.4, 123.3, 123.5, 124.0, 127.0, 129.0, 139.0,

139.9;  $^{19}\text{F}$  NMR (376 Hz,  $\text{CDCl}_3$ )  $\delta$ -73.5 (s, 6F); MS (ESI-TOF)  $m/z$  563  $[\text{M}-\text{H}]^-$ ; HRMS calcd for  $\text{C}_{18}\text{H}_{13}\text{BrF}_6\text{NO}_4\text{S}_2$   $[\text{M}-\text{H}]^-$ , 563.9374; found, 563.9377.

**1-(3-(2,2-Bis((trifluoromethyl)sulfonyl)ethyl)-9H-carbazol-9-yl)ethan-1-one 12b.** According to the synthetic procedure for **12a**, 9-acetyl-9H-carbazole **11b** (21.2 mg, 0.101 mmol) was treated by 2-fluoropyridinium salt **2a** (80.1 mg, 0.206 mmol) in  $\text{CH}_3\text{CN}$  (1.0 mL) for 8 h at 90 °C in a sealed tube. After chromatographic purification (hexane/EtOAc = 3 : 1 to 1 : 2) followed by acidification using 10% hydrochloric acid, 22.6 mg of a mixture containing 4-substituted product **12b** (37.7  $\mu\text{mol}$ , 37% yield), 3-substituted one **12b'** (3.8  $\mu\text{mol}$ , 3.8% yield), and 4,7-disubstituted product **14c** (3.8  $\mu\text{mol}$ , 3.8% yield) in a ratio of 1 : 0.10 : 0.10 was obtained. Analytically pure **12b** was isolated by repeating the column chromatography.

For **12b**. Colorless crystals (from  $\text{CHCl}_3$ ); Mp. 159-160 °C,  $^1\text{H}$  NMR (400 MHz,  $\text{CDCl}_3$ )  $\delta$  2.89 (s, 3H), 3.98 (d,  $J$  = 5.8 Hz, 2H), 5.16 (t,  $J$  = 5.8 Hz, 1H), 7.40 (dd,  $J$  = 8.6, 2.0 Hz, 1H), 7.40-7.46 (m, 1H), 7.53 (ddd,  $J$  = 8.4, 7.2, 1.3 Hz, 1H), 7.94 (d,  $J$  = 2.0 Hz, 1H), 8.02 (dd,  $J$  = 7.7, 0.6 Hz, 1H), 8.13 (d,  $J$  = 8.4 Hz, 1H), 8.32 (d,  $J$  = 8.6 Hz, 1H);  $^{13}\text{C}$  NMR (100 MHz,  $\text{CDCl}_3$ )  $\delta$  27.7, 30.5, 80.2, 116.0, 117.3, 119.2(q,  $J_{\text{CF}}$  = 330 Hz), 120.2, 120.6, 123.9, 125.6, 127.1, 127.8, 128.0, 128.4, 138.5, 138.9, 170.0;  $^{19}\text{F}$  NMR (376 Hz,  $\text{CDCl}_3$ )  $\delta$ -73.4 (s, 6F); IR (ATR)  $\nu$  2883, 1679, 1491, 1453, 1438, 1391, 1377, 1367, 1326, 1304, 1234, 1193, 1110, 1095, 813, 778, 755, 702, 651, 583, 512, 483  $\text{cm}^{-1}$ ; MS (ESI-TOF)  $m/z$  500  $[\text{M}-\text{H}]^-$ ; HRMS calcd for  $\text{C}_{18}\text{H}_{12}\text{F}_6\text{NO}_5\text{S}_2$   $[\text{M}-\text{H}]^-$ , 500.0061; found, 500.0067.

**3-(2,2-Bis((trifluoromethyl)sulfonyl)ethyl)-9-ethyl-9H-carbazole 12c.** According to the synthetic procedure for **12a**, 9-ethyl-9H-carbazole **11c** (38.8 mg, 0.199 mmol) was treated by 2-fluoropyridinium salt **2a** (80.6 mg, 0.207 mmol) in  $\text{CH}_3\text{CN}$  (2.0 mL) for 3 h at room temperature. The product **12c** was isolated in 66% yield (63.9 mg, 0.131 mmol) after column chromatography on neutral silica gel (hexane/EtOAc = 5 : 1 to 1 : 2) and the following acidification with 10% hydrochloric acid.

Greenish crystals (from CHCl<sub>3</sub>); Mp. 94-95 °C, <sup>1</sup>H NMR (400 MHz, CDCl<sub>3</sub>) δ 1.44 (t, *J* = 7.2 Hz, 3H), 4.01 (d, *J* = 5.7 Hz, 2H), 4.38 (q, *J* = 7.2 Hz, 2H), 5.17 (t, *J* = 5.7 Hz, 1H), 7.27 (ddd, *J* = 7.8, 7.1, 0.8 Hz, 1H), 7.39 (dd, *J* = 8.5, 1.6 Hz, 1H), 7.41 (d, *J* = 8.5 Hz, 1H), 7.43 (brd, *J* = 8.2 Hz, 1H), 7.51 (ddd, *J* = 8.2, 7.1, 1.0 Hz, 1H), 8.03 (brs, 1H), 8.11 (brd, *J* = 7.8 Hz, 1H); <sup>13</sup>C NMR (100 MHz, CDCl<sub>3</sub>) δ 13.8, 30.8, 37.7, 80.8, 108.8, 109.2, 119.3, 119.3 (q, *J*<sub>CF</sub> = 330 Hz), 120.6, 121.2, 122.3, 123.0, 123.5, 126.2, 126.3, 139.6, 140.4; <sup>19</sup>F NMR (376 Hz, CDCl<sub>3</sub>) δ -73.5 (s, 6F); MS (ESI-TOF) *m/z* 486 [M-H]<sup>-</sup>; IR (ATR) ν 2968, 2947, 1603, 1493, 1470, 1392, 1375, 1332, 1227, 1203, 1113, 1100, 741, 700, 641, 583, 484 cm<sup>-1</sup>; HRMS calcd for C<sub>18</sub>H<sub>14</sub>F<sub>6</sub>NO<sub>4</sub>S<sub>2</sub> [M-H]<sup>-</sup>, 486.0268; found, 486.0265.

**3,6-Bis(2,2-bis((trifluoromethyl)sulfonyl)ethyl)-9-ethyl-9*H*-carbazole 14c.** According to the synthetic procedure for **12a**, the 1 : 2 reaction of 9-ethyl-9*H*-carbazole **11c** (20.3 mg, 0.104 mmol) and 2-fluoropyridinium salt **2b** (82.8 mg, 0.213 mmol) in CH<sub>3</sub>CN (1.0 mL) was conducted for 3 h at room temperature. The product **14c** was isolated in 89% yield (72.2 mg, 92.6 μmol) by washing the crude material with 5% CHCl<sub>3</sub> in hexane (0.5 mL x 3). Its structure was also confirmed by an X-ray crystallographic analysis.

Greenish crystals (from CHCl<sub>3</sub>/hexane); Mp. 149 °C (decomp.); <sup>1</sup>H NMR (400 MHz, CDCl<sub>3</sub>) δ 1.44 (t, *J* = 7.2 Hz, 3H), 4.01 (d, *J* = 5.6 Hz, 4H), 4.37 (q, *J* = 7.2 Hz, 2H), 5.17 (d, *J* = 5.6, 1.3 Hz, 2H), 7.41 (d, *J* = 10.3 Hz, 2H), 7.42-7.45 (m, 2H), 8.03 (s, 2H); <sup>13</sup>C NMR (100 MHz, CDCl<sub>3</sub>) δ 13.8, 30.7, 37.9, 80.6, 109.5, 119.3 (q, *J*<sub>CF</sub> = 330 Hz), 121.4, 122.9, 123.6, 127.0, 140.1; <sup>19</sup>F NMR (376 Hz, CDCl<sub>3</sub>) δ -73.4 (s, 6F); MS (ESI-TOF) *m/z* 777 [M-H]<sup>-</sup>; IR (ATR) ν 2972, 2945, 1606, 1494, 1486, 1386, 1377, 1237, 1199, 1102, 806, 731, 699, 642, 579, 511, 481, 457 cm<sup>-1</sup>; HRMS calcd for C<sub>22</sub>H<sub>16</sub>F<sub>12</sub>NO<sub>8</sub>S<sub>4</sub> [M-H]<sup>-</sup>, 777.9567; found, 777.9562. Anal. Calcd for C<sub>22</sub>H<sub>17</sub>F<sub>12</sub>NO<sub>8</sub>S<sub>4</sub>: C, 33.89; H, 2.20; N, 1.80. Found: C, 33.85; H, 2.31; N, 1.96.

### X-ray crystallographic data for 14c

Crystallographic data by the X-ray diffraction study has been deposited with Cambridge Crystallographic Data Center (CCDC) as supplementary publication No. CCDC 1911534. This data can be obtained free of charge from the CCDC *via* [www.ccdc.cam.ac.uk/data\\_request/cif](http://www.ccdc.cam.ac.uk/data_request/cif).

**Table S1.** Crystal data and structure refinement for **14c**

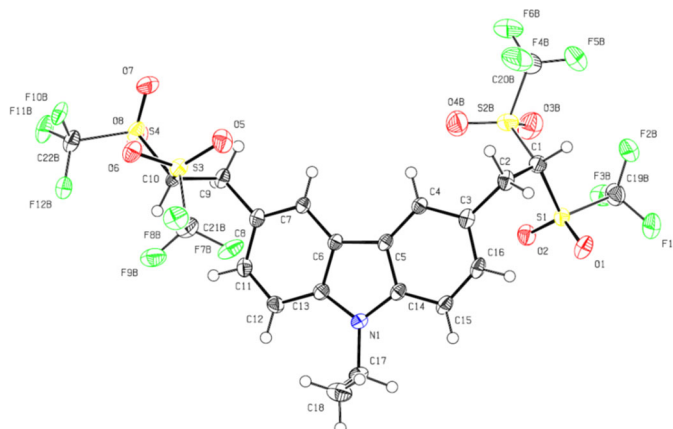

|                                                                                       |                                                                        |
|---------------------------------------------------------------------------------------|------------------------------------------------------------------------|
| $C_{22}H_{17}F_{12}NO_8S_4$                                                           | $V = 1469.2 (3) \text{ \AA}^3$                                         |
| $M_r = 779.60$                                                                        | $Z = 2$                                                                |
| Triclinic, $P\bar{1}$                                                                 | $F(000) = 784$                                                         |
| $a = 10.7413 (12) \text{ \AA}$                                                        | $D_x = 1.762 \text{ Mg m}^{-3}$                                        |
| $b = 11.0944 (12) \text{ \AA}$                                                        | Mo $K\alpha$ radiation, $\lambda = 0.71073 \text{ \AA}$                |
| $c = 13.5068 (14) \text{ \AA}$                                                        | $\mu = 0.45 \text{ mm}^{-1}$                                           |
| $\alpha = 86.340 (1)^\circ$                                                           | $T = 150 \text{ K}$                                                    |
| $\beta = 69.593 (1)^\circ$                                                            | Block, colourless                                                      |
| $\gamma = 76.912 (1)^\circ$                                                           | $0.28 \times 0.21 \times 0.09 \text{ mm}$                              |
| Bruker D8 goniometer diffractometer                                                   | 5179 independent reflections                                           |
| Radiation source: rotating-anode X-ray tube, Bruker TXS fine-focus Turbo X-ray Source | 4412 reflections with $I > 2\sigma(I)$                                 |
| Bruker Helios multilayered confocal mirror monochromator                              | $R_{\text{int}} = 0.024$                                               |
| Detector resolution: $8.333 \text{ pixels mm}^{-1}$                                   | $\theta_{\text{max}} = 25.0^\circ$ , $\theta_{\text{min}} = 1.6^\circ$ |

$\omega$  scans $h = -12 \rightarrow 12$ Absorption correction: numerical Crystal Faces plugin in Bruker  $k = -13 \rightarrow 13$ 

APEX2 software

 $T_{\min} = 0.884, T_{\max} = 0.961$  $l = -16 \rightarrow 16$ 

14293 measured reflections

Refinement on  $F^2$ 

1179 restraints

Least-squares matrix: full

Hydrogen site location: inferred from neighbouring sites

 $R[F^2 > 2\sigma(F^2)] = 0.049$ 

H-atom parameters constrained

 $wR(F^2) = 0.132$  $w = 1/[\sigma^2(F_o^2) + (0.0654P)^2 + 3.6706P]$ , where  $P = (F_o^2 + 2F_c^2)/3$  $S = 0.99$  $(\Delta/\sigma)_{\max} = 0.001$ 

5179 reflections

 $\Delta_{\max} = 1.08 \text{ e } \text{\AA}^{-3}$ 

597 parameters

 $\Delta_{\min} = -0.73 \text{ e } \text{\AA}^{-3}$ 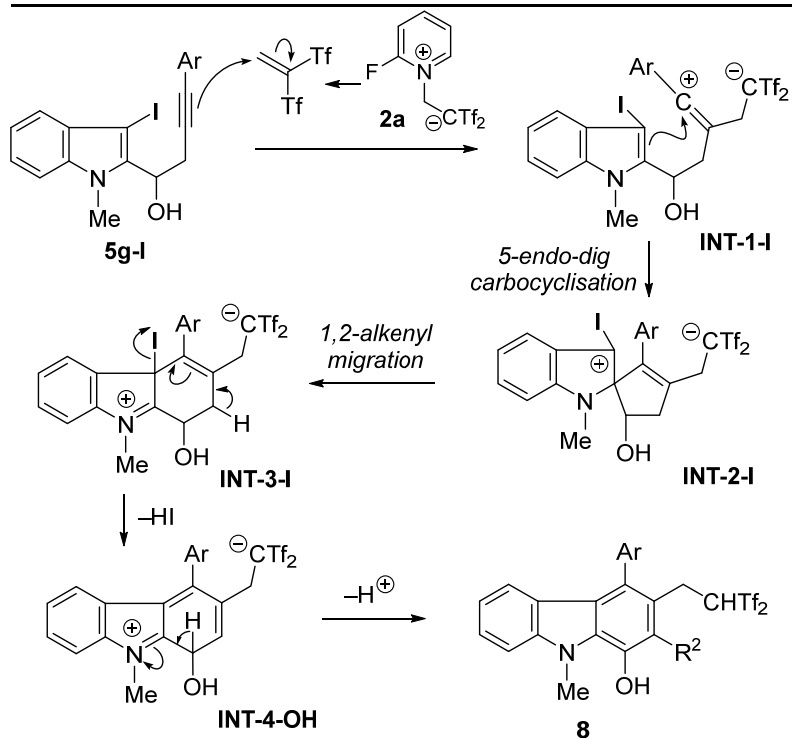**Scheme S1** Mechanistic explanation for the formation of 1-hydroxycarbazole **8**.

## DFT calculations

All calculations were carried out by using *Gaussian 09* program, revision D.01.<sup>i</sup> Molecular geometries of **13**, **TS1**, **TS2**, and **TS3** were optimized and characterised by frequency analysis using hybrid density functional theory (M06-2X)<sup>ii</sup> and the 6-31+G(d) basis set as implemented in the *Gaussian 09* program. Single imaginary frequency was obtained in all transition states, which were supported by the intrinsic reaction coordinate (IRC) calculations. Each geometry of intermediates **INT-1'**, **INT-2'** and **INT-3'** was obtained by optimisation of the IRC geometries. Molecular geometries and energy of Tf<sub>2</sub>C=CH<sub>2</sub> were used the reported one under the same level of calculation.<sup>iii</sup>

## Reaction profile of model molecule 13

**Table S1. Coordinates and energies for optimised geometry of 13**

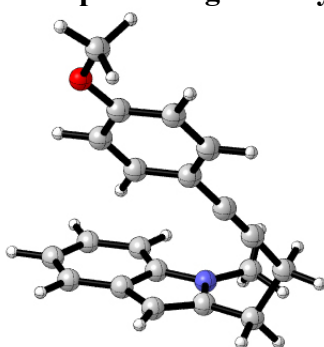

| Center Number | Atomic Number | Atomic Type | Coordinates (Angstroms) |           |           |
|---------------|---------------|-------------|-------------------------|-----------|-----------|
|               |               |             | X                       | Y         | Z         |
| 1             | 6             | 0           | -2.608173               | 2.473311  | 1.085335  |
| 2             | 1             | 0           | -2.050202               | 2.861199  | 1.934053  |
| 3             | 6             | 0           | -2.665764               | 1.089139  | 0.846777  |
| 4             | 6             | 0           | 1.074754                | -1.734661 | -0.096628 |
| 5             | 6             | 0           | 0.062641                | -2.401615 | -0.094489 |
| 6             | 6             | 0           | -2.528478               | -1.167875 | 0.777306  |
| 7             | 6             | 0           | -3.402963               | 0.615795  | -0.269532 |
| 8             | 6             | 0           | -4.073069               | 1.479931  | -1.144632 |
| 9             | 1             | 0           | -4.626236               | 1.105905  | -2.001684 |
| 10            | 6             | 0           | -3.996511               | 2.841480  | -0.882562 |
| 11            | 1             | 0           | -4.501951               | 3.539978  | -1.543305 |
| 12            | 7             | 0           | -3.312724               | -0.757842 | -0.288434 |
| 13            | 6             | 0           | -3.951951               | -1.596523 | -1.284180 |
| 14            | 1             | 0           | -4.972463               | -1.244992 | -1.456847 |
| 15            | 1             | 0           | -3.401986               | -1.576188 | -2.231066 |
| 16            | 1             | 0           | -4.003910               | -2.623829 | -0.922587 |
| 17            | 6             | 0           | -3.270958               | 3.334568  | 0.222460  |
| 18            | 1             | 0           | -3.231343               | 4.406143  | 0.396057  |
| 19            | 6             | 0           | -2.175059               | -2.603870 | 0.998904  |
| 20            | 1             | 0           | -1.718828               | -2.688191 | 1.989274  |
| 21            | 1             | 0           | -3.070755               | -3.235850 | 1.003483  |
| 22            | 6             | 0           | -1.190730               | -3.161018 | -0.055747 |
| 23            | 1             | 0           | -0.979972               | -4.210475 | 0.176526  |
| 24            | 1             | 0           | -1.653966               | -3.146324 | -1.049542 |
| 25            | 6             | 0           | -2.121421               | -0.068747 | 1.493117  |
| 26            | 1             | 0           | -1.491204               | -0.095415 | 2.372672  |
| 27            | 6             | 0           | 2.253687                | -0.914296 | -0.096513 |
| 28            | 6             | 0           | 2.146036                | 0.478873  | 0.072022  |
| 29            | 6             | 0           | 3.526695                | -1.471624 | -0.257882 |
| 30            | 6             | 0           | 3.275740                | 1.279495  | 0.078036  |

|    |   |   |          |           |           |
|----|---|---|----------|-----------|-----------|
| 31 | 1 | 0 | 1.163945 | 0.926029  | 0.199174  |
| 32 | 6 | 0 | 4.670687 | -0.673842 | -0.253852 |
| 33 | 1 | 0 | 3.627445 | -2.545111 | -0.388540 |
| 34 | 6 | 0 | 4.546046 | 0.707985  | -0.084277 |
| 35 | 1 | 0 | 3.199160 | 2.354798  | 0.207750  |
| 36 | 1 | 0 | 5.640738 | -1.139710 | -0.382257 |
| 37 | 8 | 0 | 5.591702 | 1.572705  | -0.063053 |
| 38 | 6 | 0 | 6.898168 | 1.038749  | -0.220688 |
| 39 | 1 | 0 | 7.576740 | 1.889174  | -0.170632 |
| 40 | 1 | 0 | 7.131334 | 0.333210  | 0.584042  |
| 41 | 1 | 0 | 7.002637 | 0.541383  | -1.190973 |

E(RM062X) = -903.138694339

Zero-point correction= 0.342621 (Hartree/Particle)

Sum of electronic and thermal Enthalpies = -902.775532

Sum of electronic and thermal Free Energies = -902.847448

**Table S2. Coordinates and energies for optimised geometry of TS1**

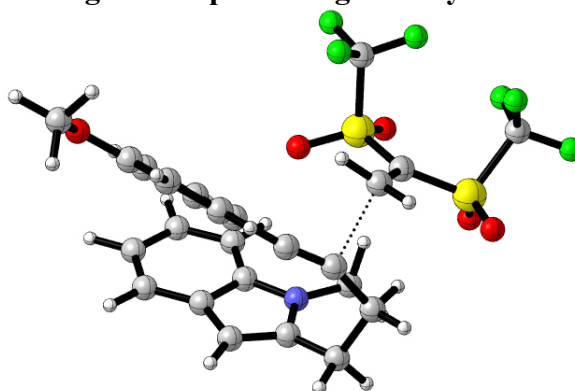

| Center Number | Atomic Number | Atomic Type | Coordinates (Angstroms) |           |           |
|---------------|---------------|-------------|-------------------------|-----------|-----------|
|               |               |             | X                       | Y         | Z         |
| 1             | 6             | 0           | 4.085237                | -2.767459 | 0.922986  |
| 2             | 1             | 0           | 5.043084                | -2.614538 | 0.431963  |
| 3             | 6             | 0           | 2.91099                 | -2.907116 | 0.162732  |
| 4             | 6             | 0           | 1.311641                | 0.152176  | -1.794146 |
| 5             | 6             | 0           | 0.295264                | -0.454443 | -2.130612 |
| 6             | 6             | 0           | -1.039238               | 1.09127   | -1.368125 |
| 7             | 1             | 0           | -1.435509               | 1.253341  | -2.366592 |
| 8             | 1             | 0           | -0.262458               | 1.773849  | -1.041142 |
| 9             | 6             | 0           | -1.856304               | 0.498452  | -0.419662 |
| 10            | 6             | 0           | 1.248199                | -3.035146 | -1.364226 |
| 11            | 6             | 0           | 1.677016                | -3.094959 | 0.836382  |
| 12            | 6             | 0           | 1.585642                | -3.152634 | 2.232677  |
| 13            | 1             | 0           | 0.631096                | -3.287419 | 2.733896  |
| 14            | 6             | 0           | 2.761941                | -3.008823 | 2.955699  |
| 15            | 1             | 0           | 2.727182                | -3.039465 | 4.040871  |
| 16            | 7             | 0           | 0.68182                 | -3.184647 | -0.11035  |
| 17            | 8             | 0           | -3.418902               | -0.11745  | -2.385136 |
| 18            | 8             | 0           | -3.524183               | -1.594056 | -0.33032  |
| 19            | 8             | 0           | -2.179115               | -0.416972 | 2.035673  |
| 20            | 8             | 0           | 0.139037                | 0.290195  | 1.257244  |
| 21            | 16            | 0           | -3.331607               | -0.287188 | -0.939098 |
| 22            | 16            | 0           | -1.309896               | 0.429475  | 1.233519  |
| 23            | 6             | 0           | -0.713362               | -3.425876 | 0.206863  |
| 24            | 1             | 0           | -0.784367               | -4.210289 | 0.965385  |

|    |   |   |           |           |           |
|----|---|---|-----------|-----------|-----------|
| 25 | 1 | 0 | -1.202784 | -2.522428 | 0.587364  |
| 26 | 1 | 0 | -1.242948 | -3.767848 | -0.683214 |
| 27 | 6 | 0 | 4.000855  | -2.816917 | 2.307199  |
| 28 | 1 | 0 | 4.901025  | -2.705815 | 2.905172  |
| 29 | 6 | 0 | -1.603499 | 2.161908  | 1.853013  |
| 30 | 6 | 0 | -4.715033 | 0.764871  | -0.268594 |
| 31 | 9 | 0 | -2.885976 | 2.481205  | 1.732942  |
| 32 | 9 | 0 | -1.248649 | 2.223649  | 3.128978  |
| 33 | 9 | 0 | -0.872541 | 3.020786  | 1.148941  |
| 34 | 9 | 0 | -4.770644 | 0.675065  | 1.052047  |
| 35 | 9 | 0 | -4.533352 | 2.030425  | -0.622731 |
| 36 | 9 | 0 | -5.850736 | 0.318735  | -0.790366 |
| 37 | 6 | 0 | 0.416367  | -2.899    | -2.598614 |
| 38 | 1 | 0 | 1.093196  | -2.84169  | -3.455272 |
| 39 | 1 | 0 | -0.235239 | -3.766425 | -2.756694 |
| 40 | 6 | 0 | -0.474507 | -1.631412 | -2.561321 |
| 41 | 1 | 0 | -0.934642 | -1.459764 | -3.539579 |
| 42 | 1 | 0 | -1.293402 | -1.788313 | -1.849386 |
| 43 | 6 | 0 | 2.606229  | -2.872892 | -1.237214 |
| 44 | 1 | 0 | 3.294302  | -2.704857 | -2.05576  |
| 45 | 6 | 0 | 2.383014  | 0.947924  | -1.32736  |
| 46 | 6 | 0 | 2.958193  | 0.687756  | -0.06227  |
| 47 | 6 | 0 | 2.893544  | 1.993701  | -2.114232 |
| 48 | 6 | 0 | 4.012815  | 1.455658  | 0.387067  |
| 49 | 1 | 0 | 2.566305  | -0.124946 | 0.542648  |
| 50 | 6 | 0 | 3.945615  | 2.777471  | -1.660176 |
| 51 | 1 | 0 | 2.456254  | 2.189854  | -3.088728 |
| 52 | 6 | 0 | 4.510631  | 2.506092  | -0.405196 |
| 53 | 1 | 0 | 4.473594  | 1.268995  | 1.352112  |
| 54 | 1 | 0 | 4.318155  | 3.582234  | -2.282101 |
| 55 | 8 | 0 | 5.536773  | 3.198539  | 0.123583  |
| 56 | 6 | 0 | 6.083185  | 4.278399  | -0.626178 |
| 57 | 1 | 0 | 6.88845   | 4.683524  | -0.015673 |
| 58 | 1 | 0 | 6.48494   | 3.923316  | -1.580149 |
| 59 | 1 | 0 | 5.326662  | 5.049746  | -0.800222 |

E(RM062X) = -2752.51045978

Zero-point correction = 0.428920 (Hartree/Particle)

Sum of electronic and thermal Enthalpies = -2752.045190

Sum of electronic and thermal Free Energies = -2752.151447

**Table S3. Coordinates and energies for optimised geometry of INT-1'**

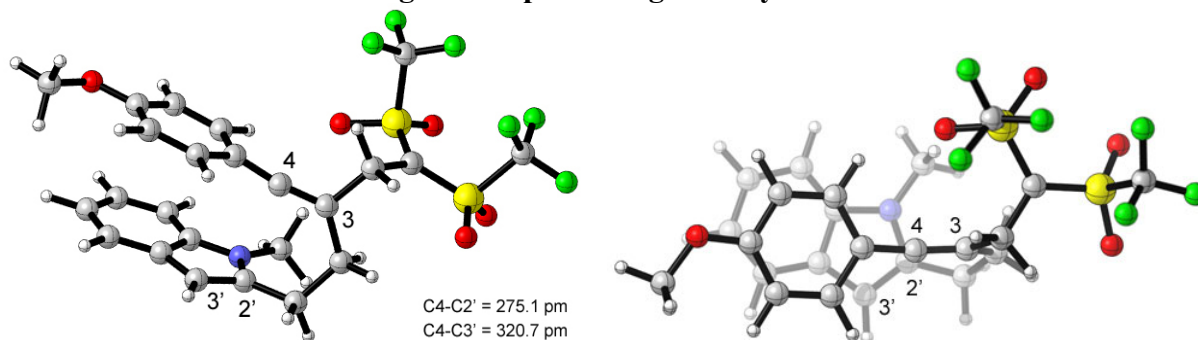

| Center Number | Atomic Number | Atomic Type | Coordinates (Angstroms) |   |   |
|---------------|---------------|-------------|-------------------------|---|---|
|               |               |             | X                       | Y | Z |
|               |               |             |                         |   |   |



|    |    |   |           |           |           |
|----|----|---|-----------|-----------|-----------|
| 1  | 6  | 0 | -5.430989 | 1.283677  | -0.214976 |
| 2  | 1  | 0 | -5.965172 | 1.403888  | -1.154314 |
| 3  | 6  | 0 | -4.138672 | 1.821651  | -0.060831 |
| 4  | 6  | 0 | -0.900991 | 0.354263  | -1.003942 |
| 5  | 6  | 0 | 0.221789  | 0.995925  | -1.014457 |
| 6  | 6  | 0 | 1.481188  | 0.15759   | -1.315539 |
| 7  | 1  | 0 | 1.964298  | 0.598698  | -2.192375 |
| 8  | 1  | 0 | 1.191326  | -0.860743 | -1.583532 |
| 9  | 6  | 0 | 2.455821  | 0.173619  | -0.16133  |
| 10 | 6  | 0 | -2.072212 | 2.71793   | -0.224078 |
| 11 | 6  | 0 | -3.449635 | 1.62075   | 1.166835  |
| 12 | 6  | 0 | -4.033729 | 0.938244  | 2.247293  |
| 13 | 1  | 0 | -3.502505 | 0.788229  | 3.182584  |
| 14 | 6  | 0 | -5.305946 | 0.42577   | 2.062745  |
| 15 | 1  | 0 | -5.781551 | -0.120952 | 2.871851  |
| 16 | 7  | 0 | -2.200709 | 2.182257  | 1.04761   |
| 17 | 8  | 0 | 3.645283  | 2.087992  | -1.37373  |
| 18 | 8  | 0 | 4.227255  | 1.739489  | 1.063196  |
| 19 | 8  | 0 | 3.074945  | -0.633758 | 2.273669  |
| 20 | 8  | 0 | 0.712857  | -0.942387 | 1.401842  |
| 21 | 16 | 0 | 3.808689  | 1.192052  | -0.223912 |
| 22 | 16 | 0 | 2.155105  | -0.836893 | 1.157408  |
| 23 | 6  | 0 | -1.167523 | 2.145847  | 2.068645  |
| 24 | 1  | 0 | -1.639403 | 2.076946  | 3.049822  |
| 25 | 1  | 0 | -0.502265 | 1.284924  | 1.926594  |
| 26 | 1  | 0 | -0.585512 | 3.069187  | 2.03679   |
| 27 | 6  | 0 | -5.996722 | 0.586531  | 0.837684  |
| 28 | 1  | 0 | -6.987683 | 0.154689  | 0.728027  |
| 29 | 6  | 0 | 2.558183  | -2.567888 | 0.594261  |
| 30 | 6  | 0 | 5.280034  | 0.172994  | -0.736838 |
| 31 | 9  | 0 | 3.823492  | -2.649459 | 0.189657  |
| 32 | 9  | 0 | 2.375406  | -3.420516 | 1.601905  |
| 33 | 9  | 0 | 1.764755  | -2.929359 | -0.417584 |
| 34 | 9  | 0 | 5.669563  | -0.632425 | 0.248346  |
| 35 | 9  | 0 | 4.975343  | -0.56639  | -1.80398  |
| 36 | 9  | 0 | 6.293341  | 0.979447  | -1.053995 |
| 37 | 6  | 0 | -0.809187 | 3.350428  | -0.715142 |
| 38 | 1  | 0 | -0.99646  | 3.656975  | -1.748341 |
| 39 | 1  | 0 | -0.586026 | 4.265038  | -0.151545 |
| 40 | 6  | 0 | 0.438901  | 2.452983  | -0.672616 |
| 41 | 1  | 0 | 1.198372  | 2.84802   | -1.355111 |
| 42 | 1  | 0 | 0.90049   | 2.46232   | 0.32251   |
| 43 | 6  | 0 | -3.248758 | 2.537183  | -0.915755 |
| 44 | 1  | 0 | -3.42288  | 2.841381  | -1.939978 |
| 45 | 6  | 0 | -1.975714 | -0.473944 | -0.949661 |
| 46 | 6  | 0 | -2.321982 | -1.120634 | 0.282608  |

|    |   |   |           |           |           |
|----|---|---|-----------|-----------|-----------|
| 47 | 6 | 0 | -2.840313 | -0.621611 | -2.081684 |
| 48 | 6 | 0 | -3.461414 | -1.872076 | 0.368015  |
| 49 | 1 | 0 | -1.653756 | -1.007099 | 1.131452  |
| 50 | 6 | 0 | -3.992164 | -1.354501 | -1.990119 |
| 51 | 1 | 0 | -2.577059 | -0.121219 | -3.008654 |
| 52 | 6 | 0 | -4.321374 | -1.968919 | -0.751618 |
| 53 | 1 | 0 | -3.755759 | -2.364723 | 1.288258  |
| 54 | 1 | 0 | -4.649698 | -1.443061 | -2.845907 |
| 55 | 8 | 0 | -5.427181 | -2.664013 | -0.558029 |
| 56 | 6 | 0 | -6.411419 | -2.741057 | -1.596062 |
| 57 | 1 | 0 | -7.233041 | -3.312519 | -1.170174 |
| 58 | 1 | 0 | -6.75109  | -1.737072 | -1.864733 |
| 59 | 1 | 0 | -6.005757 | -3.260068 | -2.467808 |

E(RM062X) = -2752.54294858

Zero-point correction= 0.431591 (Hartree/Particle)

Sum of electronic and thermal Enthalpies= -2752.075461

Sum of electronic and thermal Free Energies= -2752.179844

**Table S4. Coordinates and energies for optimised geometry of TS2**

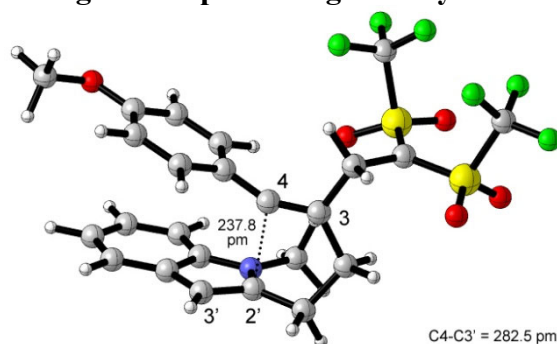

| Center Number | Atomic Number | Atomic Type | Coordinates (Angstroms) |           |           |
|---------------|---------------|-------------|-------------------------|-----------|-----------|
|               |               |             | X                       | Y         | Z         |
| 1             | 6             | 0           | 5.356102                | -1.340872 | -0.529732 |
| 2             | 1             | 0           | 5.792464                | -1.434114 | -1.520464 |
| 3             | 6             | 0           | 4.076042                | -1.87968  | -0.265469 |
| 4             | 6             | 0           | 1.000985                | -0.678622 | -0.933183 |
| 5             | 6             | 0           | -0.200711               | -1.181818 | -0.912777 |
| 6             | 6             | 0           | -1.36616                | -0.229532 | -1.218267 |
| 7             | 1             | 0           | -1.825146               | -0.566739 | -2.152732 |
| 8             | 1             | 0           | -0.979486               | 0.777049  | -1.395094 |
| 9             | 6             | 0           | -2.424631               | -0.24107  | -0.139459 |
| 10            | 6             | 0           | 1.983464                | -2.736917 | -0.255522 |
| 11            | 6             | 0           | 3.509011                | -1.721775 | 1.033937  |
| 12            | 6             | 0           | 4.203985                | -1.076099 | 2.075287  |
| 13            | 1             | 0           | 3.769824                | -0.954974 | 3.062667  |
| 14            | 6             | 0           | 5.451834                | -0.568816 | 1.779616  |
| 15            | 1             | 0           | 6.010842                | -0.054117 | 2.555627  |
| 16            | 7             | 0           | 2.259214                | -2.275864 | 1.026499  |

|    |    |   |           |           |           |
|----|----|---|-----------|-----------|-----------|
| 17 | 8  | 0 | -3.710449 | -1.897393 | -1.607367 |
| 18 | 8  | 0 | -4.428488 | -1.716981 | 0.809971  |
| 19 | 8  | 0 | -3.154915 | 0.421098  | 2.309297  |
| 20 | 8  | 0 | -0.706459 | 0.503522  | 1.654512  |
| 21 | 16 | 0 | -3.86331  | -1.098678 | -0.38665  |
| 22 | 16 | 0 | -2.124092 | 0.602774  | 1.290627  |
| 23 | 6  | 0 | 1.310998  | -2.261627 | 2.128424  |
| 24 | 1  | 0 | 1.857009  | -2.157897 | 3.066485  |
| 25 | 1  | 0 | 0.603106  | -1.431615 | 2.021587  |
| 26 | 1  | 0 | 0.76702   | -3.208506 | 2.153234  |
| 27 | 6  | 0 | 6.024781  | -0.690725 | 0.484083  |
| 28 | 1  | 0 | 7.006219  | -0.263539 | 0.300946  |
| 29 | 6  | 0 | -2.265994 | 2.414929  | 0.871731  |
| 30 | 6  | 0 | -5.182192 | 0.120396  | -0.871678 |
| 31 | 9  | 0 | -3.466627 | 2.693019  | 0.368995  |
| 32 | 9  | 0 | -2.084341 | 3.14251   | 1.973152  |
| 33 | 9  | 0 | -1.33987  | 2.763373  | -0.025209 |
| 34 | 9  | 0 | -5.517382 | 0.890413  | 0.161036  |
| 35 | 9  | 0 | -4.746746 | 0.897491  | -1.864259 |
| 36 | 9  | 0 | -6.268134 | -0.531792 | -1.287552 |
| 37 | 6  | 0 | 0.73739   | -3.485431 | -0.60657  |
| 38 | 1  | 0 | 0.873936  | -3.862444 | -1.623713 |
| 39 | 1  | 0 | 0.612507  | -4.357663 | 0.045286  |
| 40 | 6  | 0 | -0.520665 | -2.60586  | -0.552163 |
| 41 | 1  | 0 | -1.301911 | -2.992356 | -1.214979 |
| 42 | 1  | 0 | -0.955619 | -2.586156 | 0.455677  |
| 43 | 6  | 0 | 3.112254  | -2.551948 | -1.049063 |
| 44 | 1  | 0 | 3.183964  | -2.831929 | -2.092453 |
| 45 | 6  | 0 | 1.967194  | 0.308912  | -0.88128  |
| 46 | 6  | 0 | 2.231469  | 0.963778  | 0.354383  |
| 47 | 6  | 0 | 2.762502  | 0.631179  | -2.015452 |
| 48 | 6  | 0 | 3.231359  | 1.903478  | 0.442182  |
| 49 | 1  | 0 | 1.616763  | 0.720112  | 1.215837  |
| 50 | 6  | 0 | 3.753097  | 1.580652  | -1.935855 |
| 51 | 1  | 0 | 2.578607  | 0.112019  | -2.951783 |
| 52 | 6  | 0 | 4.005255  | 2.211148  | -0.693862 |
| 53 | 1  | 0 | 3.45457   | 2.409732  | 1.375415  |
| 54 | 1  | 0 | 4.34357   | 1.818069  | -2.812058 |
| 55 | 8  | 0 | 4.965551  | 3.115472  | -0.511028 |
| 56 | 6  | 0 | 5.827635  | 3.449252  | -1.600729 |
| 57 | 1  | 0 | 6.527556  | 4.181264  | -1.203642 |
| 58 | 1  | 0 | 6.368796  | 2.56245   | -1.942756 |
| 59 | 1  | 0 | 5.255301  | 3.888412  | -2.42225  |

---

E(RM062X) = -2752.54125143

Zero-point correction = 0.431279 (Hartree/Particle)

Sum of electronic and thermal Enthalpies = -2752.074638

Sum of electronic and thermal Free Energies = -2752.176969

**Table S5. Coordinates and energies for optimised geometry of INT-2'**

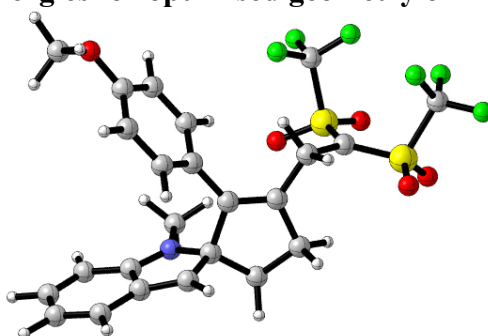

| Center Number | Atomic Number | Atomic Type | Coordinates (Angstroms) |           |           |
|---------------|---------------|-------------|-------------------------|-----------|-----------|
|               |               |             | X                       | Y         | Z         |
| 1             | 6             | 0           | 5.760898                | -2.150417 | -1.166241 |
| 2             | 1             | 0           | 5.868648                | -2.490242 | -2.191028 |
| 3             | 6             | 0           | 4.447727                | -2.024208 | -0.590762 |
| 4             | 6             | 0           | 1.278565                | -0.721591 | -0.429736 |
| 5             | 6             | 0           | 0.016572                | -1.13852  | -0.596103 |
| 6             | 6             | 0           | -1.151373               | -0.272721 | -0.982391 |
| 7             | 1             | 0           | -1.439203               | -0.51172  | -2.012498 |
| 8             | 1             | 0           | -0.852925               | 0.780261  | -0.979178 |
| 9             | 6             | 0           | -2.375199               | -0.502021 | -0.110356 |
| 10            | 6             | 0           | 2.186381                | -1.89871  | -0.029424 |
| 11            | 6             | 0           | 4.301985                | -1.571436 | 0.787281  |
| 12            | 6             | 0           | 5.444388                | -1.248593 | 1.5755    |
| 13            | 1             | 0           | 5.346264                | -0.916836 | 2.602845  |
| 14            | 6             | 0           | 6.660971                | -1.381769 | 0.971386  |
| 15            | 1             | 0           | 7.555168                | -1.142234 | 1.539212  |
| 16            | 7             | 0           | 3.026704                | -1.522698 | 1.114173  |
| 17            | 8             | 0           | -3.264727               | -1.996891 | -1.989749 |
| 18            | 8             | 0           | -4.333488               | -2.266049 | 0.283767  |
| 19            | 8             | 0           | -3.517264               | -0.327613 | 2.263632  |
| 20            | 8             | 0           | -1.023651               | 0.062192  | 2.035177  |
| 21            | 16            | 0           | -3.665779               | -1.417966 | -0.702177 |
| 22            | 16            | 0           | -2.373982               | 0.103827  | 1.461276  |
| 23            | 6             | 0           | 2.472575                | -1.057373 | 2.377542  |
| 24            | 1             | 0           | 2.988695                | -0.146607 | 2.689926  |
| 25            | 1             | 0           | 1.414256                | -0.831238 | 2.226441  |
| 26            | 1             | 0           | 2.578965                | -1.82843  | 3.145395  |
| 27            | 6             | 0           | 6.830291                | -1.830935 | -0.394686 |
| 28            | 1             | 0           | 7.83749                 | -1.907813 | -0.789048 |
| 29            | 6             | 0           | -2.652429               | 1.94152   | 1.311723  |
| 30            | 6             | 0           | -5.027009               | -0.253765 | -1.207771 |
| 31            | 9             | 0           | -3.818491               | 2.195162  | 0.720227  |
| 32            | 9             | 0           | -2.658703               | 2.497263  | 2.523789  |

|    |   |   |           |           |           |
|----|---|---|-----------|-----------|-----------|
| 33 | 9 | 0 | -1.681764 | 2.50954   | 0.590885  |
| 34 | 9 | 0 | -5.61231  | 0.288285  | -0.141445 |
| 35 | 9 | 0 | -4.537757 | 0.724312  | -1.971631 |
| 36 | 9 | 0 | -5.949609 | -0.916278 | -1.908266 |
| 37 | 6 | 0 | 1.176017  | -3.03862  | 0.290684  |
| 38 | 1 | 0 | 1.552962  | -4.015595 | -0.016878 |
| 39 | 1 | 0 | 1.027864  | -3.060058 | 1.373902  |
| 40 | 6 | 0 | -0.131367 | -2.625281 | -0.405443 |
| 41 | 1 | 0 | -0.249748 | -3.117087 | -1.379574 |
| 42 | 1 | 0 | -1.01038  | -2.881247 | 0.194472  |
| 43 | 6 | 0 | 3.194449  | -2.231831 | -1.072676 |
| 44 | 1 | 0 | 2.911085  | -2.574629 | -2.062595 |
| 45 | 6 | 0 | 1.83372   | 0.648238  | -0.531461 |
| 46 | 6 | 0 | 1.446815  | 1.636536  | 0.388699  |
| 47 | 6 | 0 | 2.764145  | 0.990628  | -1.515764 |
| 48 | 6 | 0 | 1.964936  | 2.921016  | 0.315275  |
| 49 | 1 | 0 | 0.724787  | 1.385281  | 1.161724  |
| 50 | 6 | 0 | 3.297887  | 2.277994  | -1.599982 |
| 51 | 1 | 0 | 3.075047  | 0.250443  | -2.249141 |
| 52 | 6 | 0 | 2.895031  | 3.249272  | -0.679691 |
| 53 | 1 | 0 | 1.66109   | 3.68806   | 1.021808  |
| 54 | 1 | 0 | 4.01152   | 2.504236  | -2.383641 |
| 55 | 8 | 0 | 3.347676  | 4.529768  | -0.672377 |
| 56 | 6 | 0 | 4.286093  | 4.906471  | -1.668806 |
| 57 | 1 | 0 | 4.513442  | 5.95548   | -1.483788 |
| 58 | 1 | 0 | 5.202707  | 4.312018  | -1.58873  |
| 59 | 1 | 0 | 3.858424  | 4.793958  | -2.670836 |

E(RM062X) = -2752.57118299

Zero-point correction = 0.431651 (Hartree/Particle)

Sum of electronic and thermal Enthalpies = -2752.103669

Sum of electronic and thermal Free Energies = -2752.209060

**Table S6. Coordinates and energies for optimised geometry of TS3**

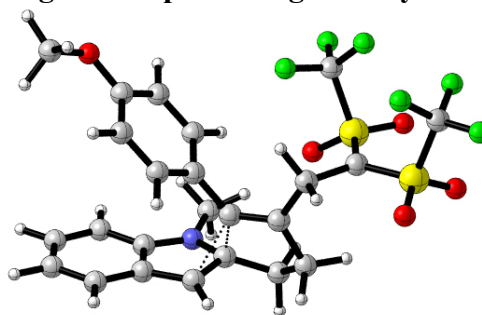

| Center Number | Atomic Number | Atomic Type | Coordinates (Angstroms) |           |           |
|---------------|---------------|-------------|-------------------------|-----------|-----------|
|               |               |             | X                       | Y         | Z         |
| 1             | 6             | 0           | 4.9279                  | -1.662263 | -1.675798 |
| 2             | 1             | 0           | 4.815189                | -1.885002 | -2.732538 |
| 3             | 6             | 0           | 3.865016                | -1.910069 | -0.780401 |

|    |    |   |           |           |           |
|----|----|---|-----------|-----------|-----------|
| 4  | 6  | 0 | 1.219655  | -1.004364 | -0.495314 |
| 5  | 6  | 0 | -0.052803 | -1.369472 | -0.745679 |
| 6  | 6  | 0 | -1.141236 | -0.405818 | -1.131159 |
| 7  | 1  | 0 | -1.486061 | -0.66391  | -2.139827 |
| 8  | 1  | 0 | -0.734407 | 0.609088  | -1.184655 |
| 9  | 6  | 0 | -2.348801 | -0.496806 | -0.213584 |
| 10 | 6  | 0 | 1.882884  | -2.31977  | 0.313736  |
| 11 | 6  | 0 | 4.000391  | -1.610899 | 0.604073  |
| 12 | 6  | 0 | 5.190444  | -1.0574   | 1.114557  |
| 13 | 1  | 0 | 5.30615   | -0.821935 | 2.167008  |
| 14 | 6  | 0 | 6.212607  | -0.835118 | 0.21382   |
| 15 | 1  | 0 | 7.146129  | -0.41492  | 0.576524  |
| 16 | 7  | 0 | 2.842428  | -1.911762 | 1.254899  |
| 17 | 8  | 0 | -3.595884 | -1.579768 | -2.172317 |
| 18 | 8  | 0 | -4.635925 | -1.816947 | 0.119832  |
| 19 | 8  | 0 | -3.357822 | -0.332323 | 2.222104  |
| 20 | 8  | 0 | -0.84709  | -0.46114  | 1.907392  |
| 21 | 16 | 0 | -3.82675  | -1.049486 | -0.823908 |
| 22 | 16 | 0 | -2.171801 | -0.068853 | 1.410595  |
| 23 | 6  | 0 | 2.553179  | -1.62832  | 2.652981  |
| 24 | 1  | 0 | 3.110703  | -0.74258  | 2.964492  |
| 25 | 1  | 0 | 1.48642   | -1.419775 | 2.760054  |
| 26 | 1  | 0 | 2.826869  | -2.476798 | 3.285223  |
| 27 | 6  | 0 | 6.093965  | -1.134968 | -1.169799 |
| 28 | 1  | 0 | 6.934517  | -0.936801 | -1.826325 |
| 29 | 6  | 0 | -2.051865 | 1.79033   | 1.455499  |
| 30 | 6  | 0 | -4.906495 | 0.426735  | -1.164191 |
| 31 | 9  | 0 | -3.162559 | 2.343539  | 0.971862  |
| 32 | 9  | 0 | -1.885182 | 2.196425  | 2.714727  |
| 33 | 9  | 0 | -1.015924 | 2.216009  | 0.730739  |
| 34 | 9  | 0 | -5.307789 | 0.994267  | -0.029143 |
| 35 | 9  | 0 | -4.235162 | 1.32916   | -1.881767 |
| 36 | 9  | 0 | -5.982953 | 0.050211  | -1.855916 |
| 37 | 6  | 0 | 0.682628  | -3.174662 | 0.647335  |
| 38 | 1  | 0 | 0.950698  | -4.233884 | 0.673916  |
| 39 | 1  | 0 | 0.283398  | -2.879241 | 1.621362  |
| 40 | 6  | 0 | -0.337325 | -2.819337 | -0.448656 |
| 41 | 1  | 0 | -0.187765 | -3.429155 | -1.350945 |
| 42 | 1  | 0 | -1.367995 | -2.97064  | -0.119938 |
| 43 | 6  | 0 | 2.554284  | -2.40333  | -0.961176 |
| 44 | 1  | 0 | 2.134587  | -2.860889 | -1.848408 |
| 45 | 6  | 0 | 1.851684  | 0.324279  | -0.478004 |
| 46 | 6  | 0 | 1.854695  | 1.08306   | 0.70347   |
| 47 | 6  | 0 | 2.484804  | 0.844416  | -1.609256 |
| 48 | 6  | 0 | 2.47797   | 2.3199    | 0.747457  |
| 49 | 1  | 0 | 1.337969  | 0.704005  | 1.581357  |

|    |   |   |          |          |           |
|----|---|---|----------|----------|-----------|
| 50 | 6 | 0 | 3.109122 | 2.089636 | -1.583624 |
| 51 | 1 | 0 | 2.496403 | 0.263875 | -2.528711 |
| 52 | 6 | 0 | 3.112706 | 2.828258 | -0.394588 |
| 53 | 1 | 0 | 2.479478 | 2.915357 | 1.655349  |
| 54 | 1 | 0 | 3.58769  | 2.462904 | -2.481352 |
| 55 | 8 | 0 | 3.699253 | 4.041318 | -0.255204 |
| 56 | 6 | 0 | 4.359752 | 4.596334 | -1.384398 |
| 57 | 1 | 0 | 4.75904  | 5.554188 | -1.054185 |
| 58 | 1 | 0 | 5.179443 | 3.949053 | -1.714029 |
| 59 | 1 | 0 | 3.656257 | 4.755096 | -2.208423 |

E(RM062X) = -2752.56022051

Zero-point correction = 0.430559 (Hartree/Particle)

Sum of electronic and thermal Enthalpies = -2752.094486

Sum of electronic and thermal Free Energies = -2752.197949

**Table S7. Coordinates and energies for optimised geometry of INT-3'**

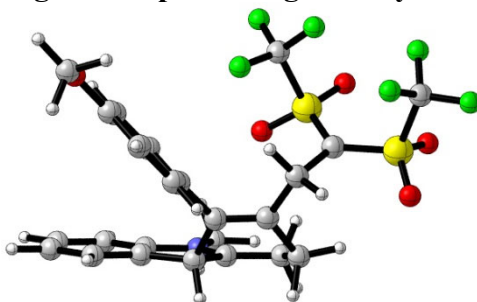

| Center Number | Atomic Number | Atomic Type | Coordinates (Angstroms) |           |           |
|---------------|---------------|-------------|-------------------------|-----------|-----------|
|               |               |             | X                       | Y         | Z         |
| 1             | 6             | 0           | 4.782922                | -0.37141  | -0.963131 |
| 2             | 1             | 0           | 4.685546                | 0.375078  | -1.745856 |
| 3             | 6             | 0           | 3.764403                | -1.280133 | -0.716569 |
| 4             | 6             | 0           | 1.343321                | -0.413963 | -1.278981 |
| 5             | 6             | 0           | 0.085751                | -0.8242   | -1.51226  |
| 6             | 6             | 0           | -1.131039               | 0.048917  | -1.321311 |
| 7             | 1             | 0           | -1.68907                | 0.110526  | -2.261582 |
| 8             | 1             | 0           | -0.834859               | 1.069035  | -1.063262 |
| 9             | 6             | 0           | -2.078249               | -0.535287 | -0.279016 |
| 10            | 6             | 0           | 1.89376                 | -2.668792 | -0.574069 |
| 11            | 6             | 0           | 3.915442                | -2.218732 | 0.30202   |
| 12            | 6             | 0           | 5.035003                | -2.30173  | 1.113094  |
| 13            | 1             | 0           | 5.128506                | -3.041814 | 1.901036  |
| 14            | 6             | 0           | 6.048645                | -1.373809 | 0.861337  |
| 15            | 1             | 0           | 6.94615                 | -1.392072 | 1.470856  |
| 16            | 7             | 0           | 2.735185                | -3.029069 | 0.348228  |
| 17            | 8             | 0           | -3.625488               | -1.207884 | -2.208289 |
| 18            | 8             | 0           | -4.197855               | -2.104091 | 0.083123  |
| 19            | 8             | 0           | -2.595561               | -1.128128 | 2.241255  |
| 20            | 8             | 0           | -0.194162               | -0.884959 | 1.487618  |

|    |    |   |           |           |           |
|----|----|---|-----------|-----------|-----------|
| 21 | 16 | 0 | -3.61699  | -1.052197 | -0.74844  |
| 22 | 16 | 0 | -1.608873 | -0.526979 | 1.34481   |
| 23 | 6  | 0 | 2.545454  | -4.075837 | 1.34879   |
| 24 | 1  | 0 | 2.600991  | -3.624674 | 2.341095  |
| 25 | 1  | 0 | 1.572669  | -4.540662 | 1.202747  |
| 26 | 1  | 0 | 3.334247  | -4.820624 | 1.230319  |
| 27 | 6  | 0 | 5.925865  | -0.426674 | -0.160314 |
| 28 | 1  | 0 | 6.730755  | 0.281621  | -0.328969 |
| 29 | 6  | 0 | -1.600679 | 1.258511  | 1.885977  |
| 30 | 6  | 0 | -4.810601 | 0.356584  | -0.511968 |
| 31 | 9  | 0 | -2.80276  | 1.806891  | 1.709482  |
| 32 | 9  | 0 | -1.287388 | 1.330482  | 3.18068   |
| 33 | 9  | 0 | -0.707227 | 1.96603   | 1.193957  |
| 34 | 9  | 0 | -5.052692 | 0.562763  | 0.78114   |
| 35 | 9  | 0 | -4.303868 | 1.474356  | -1.037547 |
| 36 | 9  | 0 | -5.966898 | 0.088033  | -1.121402 |
| 37 | 6  | 0 | 0.527393  | -3.189295 | -0.818112 |
| 38 | 1  | 0 | 0.57769   | -4.230607 | -1.159688 |
| 39 | 1  | 0 | -0.033775 | -3.170076 | 0.124324  |
| 40 | 6  | 0 | -0.15292  | -2.278221 | -1.855591 |
| 41 | 1  | 0 | 0.256266  | -2.49763  | -2.850953 |
| 42 | 1  | 0 | -1.221415 | -2.500721 | -1.888761 |
| 43 | 6  | 0 | 2.427188  | -1.506409 | -1.359762 |
| 44 | 1  | 0 | 2.544885  | -1.819374 | -2.410481 |
| 45 | 6  | 0 | 1.733303  | 0.967944  | -0.905294 |
| 46 | 6  | 0 | 2.290796  | 1.255273  | 0.351595  |
| 47 | 6  | 0 | 1.539575  | 2.024542  | -1.795139 |
| 48 | 6  | 0 | 2.634569  | 2.550996  | 0.700664  |
| 49 | 1  | 0 | 2.438991  | 0.454893  | 1.07267   |
| 50 | 6  | 0 | 1.876466  | 3.338729  | -1.458967 |
| 51 | 1  | 0 | 1.114292  | 1.823811  | -2.775719 |
| 52 | 6  | 0 | 2.427108  | 3.602543  | -0.203553 |
| 53 | 1  | 0 | 3.056471  | 2.774853  | 1.6761    |
| 54 | 1  | 0 | 1.707223  | 4.130087  | -2.179752 |
| 55 | 8  | 0 | 2.789604  | 4.838561  | 0.229693  |
| 56 | 6  | 0 | 2.58056   | 5.934882  | -0.647288 |
| 57 | 1  | 0 | 2.923442  | 6.818152  | -0.109856 |
| 58 | 1  | 0 | 3.161328  | 5.816038  | -1.568583 |
| 59 | 1  | 0 | 1.518162  | 6.042908  | -0.892098 |

---

E(RM062X) = -2752.59679436

Zero-point correction = 0.433036 (Hartree/Particle)

Sum of electronic and thermal Enthalpies = -2752.128424

Sum of electronic and thermal Free Energies = -2752.232305



## Reaction profile of cyclobutene-forming reaction of INT-1'

Table S8. Coordinates and energies for transition state of cyclobutene-forming reaction

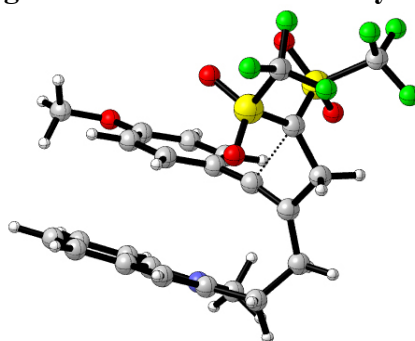

| Center Number | Atomic Number | Atomic Type | Coordinates (Angstroms) |           |           |
|---------------|---------------|-------------|-------------------------|-----------|-----------|
|               |               |             | X                       | Y         | Z         |
| 1             | 6             | 0           | -4.522093               | -0.394481 | 2.128945  |
| 2             | 1             | 0           | -4.341376               | -0.452292 | 3.199289  |
| 3             | 6             | 0           | -3.825256               | -1.236435 | 1.244586  |
| 4             | 6             | 0           | -0.208005               | -0.791754 | -0.489328 |
| 5             | 6             | 0           | 0.347361                | -1.966498 | -0.693083 |
| 6             | 6             | 0           | 1.825005                | -1.85933  | -0.454906 |
| 7             | 1             | 0           | 2.39573                 | -2.112855 | -1.354424 |
| 8             | 1             | 0           | 2.157109                | -2.526677 | 0.347058  |
| 9             | 6             | 0           | 1.979218                | -0.386962 | -0.069704 |
| 10            | 6             | 0           | -2.500975               | -2.703218 | 0.146918  |
| 11            | 6             | 0           | -4.084748               | -1.141115 | -0.148256 |
| 12            | 6             | 0           | -4.993517               | -0.214695 | -0.676454 |
| 13            | 1             | 0           | -5.162108               | -0.127343 | -1.746198 |
| 14            | 6             | 0           | -5.653616               | 0.612779  | 0.220185  |
| 15            | 1             | 0           | -6.360236               | 1.347094  | -0.157523 |
| 16            | 7             | 0           | -3.289846               | -2.060931 | -0.793303 |
| 17            | 8             | 0           | 1.802126                | 0.33045   | -2.547952 |
| 18            | 8             | 0           | 2.387884                | 2.103171  | -0.827622 |
| 19            | 8             | 0           | 1.453882                | 1.37441   | 1.84387   |
| 20            | 8             | 0           | 1.404358                | -1.112679 | 2.320293  |
| 21            | 16            | 0           | 2.435533                | 0.721053  | -1.289017 |
| 22            | 16            | 0           | 1.960778                | 0.030605  | 1.596329  |
| 23            | 6             | 0           | -3.315378               | -2.297994 | -2.224092 |
| 24            | 1             | 0           | -4.337069               | -2.174052 | -2.589538 |
| 25            | 1             | 0           | -2.660747               | -1.600587 | -2.760071 |
| 26            | 1             | 0           | -3.005226               | -3.322996 | -2.433397 |
| 27            | 6             | 0           | -5.42726                | 0.51885   | 1.611819  |
| 28            | 1             | 0           | -5.969888               | 1.179384  | 2.282984  |
| 29            | 6             | 0           | 3.714424                | 0.092675  | 2.230504  |
| 30            | 6             | 0           | 4.23963                 | 0.428886  | -1.665197 |
| 31            | 9             | 0           | 4.407662                | -0.93488  | 1.741432  |
| 32            | 9             | 0           | 4.302995                | 1.228263  | 1.873058  |
| 33            | 9             | 0           | 3.703805                | 0.012582  | 3.558156  |

|    |   |   |           |           |           |
|----|---|---|-----------|-----------|-----------|
| 34 | 9 | 0 | 4.990521  | 0.670881  | -0.595824 |
| 35 | 9 | 0 | 4.430451  | -0.834468 | -2.045331 |
| 36 | 9 | 0 | 4.615257  | 1.238697  | -2.650847 |
| 37 | 6 | 0 | -1.473117 | -3.726323 | -0.2165   |
| 38 | 1 | 0 | -1.028546 | -4.081017 | 0.718052  |
| 39 | 6 | 0 | -0.355653 | -3.223266 | -1.15142  |
| 40 | 1 | 0 | 0.4007    | -4.008755 | -1.245404 |
| 41 | 1 | 0 | -0.748459 | -3.046918 | -2.157447 |
| 42 | 6 | 0 | -2.808999 | -2.231589 | 1.400158  |
| 43 | 1 | 0 | -2.338035 | -2.55292  | 2.320385  |
| 44 | 6 | 0 | -1.068029 | 0.287312  | -0.511102 |
| 45 | 6 | 0 | -1.400205 | 0.895676  | -1.759715 |
| 46 | 6 | 0 | -1.617346 | 0.819609  | 0.686471  |
| 47 | 6 | 0 | -2.286132 | 1.939448  | -1.80102  |
| 48 | 1 | 0 | -0.94843  | 0.508809  | -2.668271 |
| 49 | 6 | 0 | -2.471462 | 1.899075  | 0.651244  |
| 50 | 1 | 0 | -1.347391 | 0.366973  | 1.635812  |
| 51 | 6 | 0 | -2.835255 | 2.443914  | -0.596181 |
| 52 | 1 | 0 | -2.581708 | 2.401505  | -2.737097 |
| 53 | 1 | 0 | -2.881142 | 2.290531  | 1.57379   |
| 54 | 8 | 0 | -3.69339  | 3.44889   | -0.741047 |
| 55 | 6 | 0 | -4.288098 | 4.030519  | 0.421753  |
| 56 | 1 | 0 | -4.964784 | 4.796682  | 0.049135  |
| 57 | 1 | 0 | -4.84715  | 3.273688  | 0.979707  |
| 58 | 1 | 0 | -3.520143 | 4.483419  | 1.054704  |
| 59 | 1 | 0 | -1.941181 | -4.595806 | -0.695294 |

E(RM062X) = -2752.53290220

Zero-point correction= 0.430624 (Hartree/Particle)

Sum of electronic and thermal Enthalpies = -2752.066816

Sum of electronic and thermal Free Energies = -2752.169706

**Table S9. Coordinates and energies for cyclobutene product**

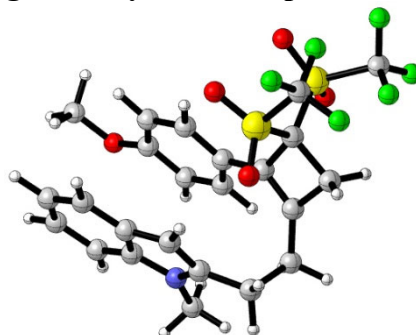

| Center Number | Atomic Number | Atomic Type | Coordinates (Angstroms) |           |           |
|---------------|---------------|-------------|-------------------------|-----------|-----------|
|               |               |             | X                       | Y         | Z         |
| 1             | 6             | 0           | 3.520153                | -1.207989 | -2.239227 |
| 2             | 1             | 0           | 2.938177                | -1.480478 | -3.116381 |
| 3             | 6             | 0           | 3.100194                | -1.603117 | -0.957814 |
| 4             | 6             | 0           | -0.207657               | -0.084419 | 0.894465  |

|    |    |   |           |           |           |
|----|----|---|-----------|-----------|-----------|
| 5  | 6  | 0 | -0.459943 | -1.042169 | 1.814468  |
| 6  | 6  | 0 | -1.947848 | -1.096223 | 1.566002  |
| 7  | 1  | 0 | -2.542748 | -0.637781 | 2.362961  |
| 8  | 1  | 0 | -2.394896 | -2.0517   | 1.27662   |
| 9  | 6  | 0 | -1.647918 | -0.108165 | 0.393485  |
| 10 | 6  | 0 | 2.110996  | -2.384353 | 0.920058  |
| 11 | 6  | 0 | 3.878303  | -1.224465 | 0.165829  |
| 12 | 6  | 0 | 5.054544  | -0.474947 | 0.044775  |
| 13 | 1  | 0 | 5.633217  | -0.181442 | 0.916777  |
| 14 | 6  | 0 | 5.440626  | -0.094768 | -1.232986 |
| 15 | 1  | 0 | 6.342247  | 0.498356  | -1.362461 |
| 16 | 7  | 0 | 3.26538   | -1.714727 | 1.295473  |
| 17 | 8  | 0 | -1.826497 | 2.200169  | 1.645798  |
| 18 | 8  | 0 | -2.389346 | 2.197834  | -0.833021 |
| 19 | 8  | 0 | -1.197698 | -0.137477 | -2.302321 |
| 20 | 8  | 0 | -1.26621  | -2.323642 | -1.021665 |
| 21 | 16 | 0 | -2.407089 | 1.564703  | 0.474862  |
| 22 | 16 | 0 | -1.742069 | -0.967219 | -1.241007 |
| 23 | 6  | 0 | 3.81643   | -1.572606 | 2.627677  |
| 24 | 1  | 0 | 4.855211  | -1.916332 | 2.641104  |
| 25 | 1  | 0 | 3.785936  | -0.526002 | 2.951177  |
| 26 | 1  | 0 | 3.246381  | -2.179902 | 3.330896  |
| 27 | 6  | 0 | 4.680428  | -0.457297 | -2.365728 |
| 28 | 1  | 0 | 5.011892  | -0.138875 | -3.350504 |
| 29 | 6  | 0 | -3.548535 | -1.169837 | -1.669686 |
| 30 | 6  | 0 | -4.233576 | 1.304494  | 0.932922  |
| 31 | 9  | 0 | -4.145367 | -1.963318 | -0.794612 |
| 32 | 9  | 0 | -4.14826  | 0.014466  | -1.693379 |
| 33 | 9  | 0 | -3.596744 | -1.715597 | -2.873214 |
| 34 | 9  | 0 | -4.532917 | 0.007746  | 0.905114  |
| 35 | 9  | 0 | -4.437091 | 1.773257  | 2.149519  |
| 36 | 9  | 0 | -4.987289 | 1.953975  | 0.066334  |
| 37 | 6  | 0 | 1.155592  | -2.955022 | 1.919365  |
| 38 | 1  | 0 | 0.436135  | -3.576666 | 1.377238  |
| 39 | 6  | 0 | 0.385159  | -1.870513 | 2.721027  |
| 40 | 1  | 0 | -0.252879 | -2.362715 | 3.461278  |
| 41 | 1  | 0 | 1.094994  | -1.245163 | 3.271492  |
| 42 | 6  | 0 | 1.983731  | -2.341589 | -0.446868 |
| 43 | 1  | 0 | 1.154278  | -2.755438 | -1.004723 |
| 44 | 6  | 0 | 0.939256  | 0.765332  | 0.563104  |
| 45 | 6  | 0 | 1.825696  | 1.116839  | 1.597267  |
| 46 | 6  | 0 | 1.192728  | 1.256584  | -0.718624 |
| 47 | 6  | 0 | 2.946697  | 1.886141  | 1.345969  |
| 48 | 1  | 0 | 1.62136   | 0.795321  | 2.615018  |
| 49 | 6  | 0 | 2.317277  | 2.038227  | -0.984986 |
| 50 | 1  | 0 | 0.519766  | 1.020981  | -1.536568 |

|    |   |   |          |           |           |
|----|---|---|----------|-----------|-----------|
| 51 | 6 | 0 | 3.213283 | 2.333018  | 0.043645  |
| 52 | 1 | 0 | 3.637308 | 2.148892  | 2.142362  |
| 53 | 1 | 0 | 2.489391 | 2.384006  | -1.997615 |
| 54 | 8 | 0 | 4.354061 | 3.048304  | -0.116695 |
| 55 | 6 | 0 | 4.680992 | 3.47945   | -1.429571 |
| 56 | 1 | 0 | 5.646808 | 3.977202  | -1.349432 |
| 57 | 1 | 0 | 4.760364 | 2.623128  | -2.108649 |
| 58 | 1 | 0 | 3.933235 | 4.185556  | -1.807041 |
| 59 | 1 | 0 | 1.667583 | -3.609509 | 2.634431  |

$E(\text{RM062X}) = -2752.57924435$

Zero-point correction = 0.431587 (Hartree/Particle)

Sum of electronic and thermal Enthalpies = -2752.112327

Sum of electronic and thermal Free Energies = -2752.213022

### NBO and QTAIM analyses

With DFT optimised geometries and wavefunctions of **INT-1'** and **TS2**, detailed bond analyses by applying Bader's Quantum Theory of Atoms in Molecules (QTAIM)<sup>iv</sup> and Natural Bond Orbital (NBO) theory<sup>v</sup> were conducted. In QTAIM analysis of **INT-1'**, three bond paths between aryl vinyl-type carbocation moiety and indole moiety were obtained. Even at the stage of **INT-1'**, the cationic C4 atom interacts with the C2' atom (the indole 2-position) rather than the C3' atom (the indole 3-position). The electron density  $\rho$  of  $0.0157 e \text{ bohr}^{-3}$  and the Laplacian  $\nabla^2\rho$  of  $+0.0485 e \text{ bohr}^{-5}$  at the C4–C2' bond critical point (BCP) indicate that this interatomic interaction has a slight charge-transfer character. Indeed, in the picture of NBO analysis, a  $\pi_{\text{C2'-C3'}/\pi^*_{\text{C3-C4}}$  interaction with second-order perturbation energies  $E(2)$  of  $2.72 \text{ kcal mol}^{-1}$  was computed. Not surprisingly, this orbital interaction is enhanced to  $19.18 \text{ kcal mol}^{-1}$  at the **TS2** geometry.

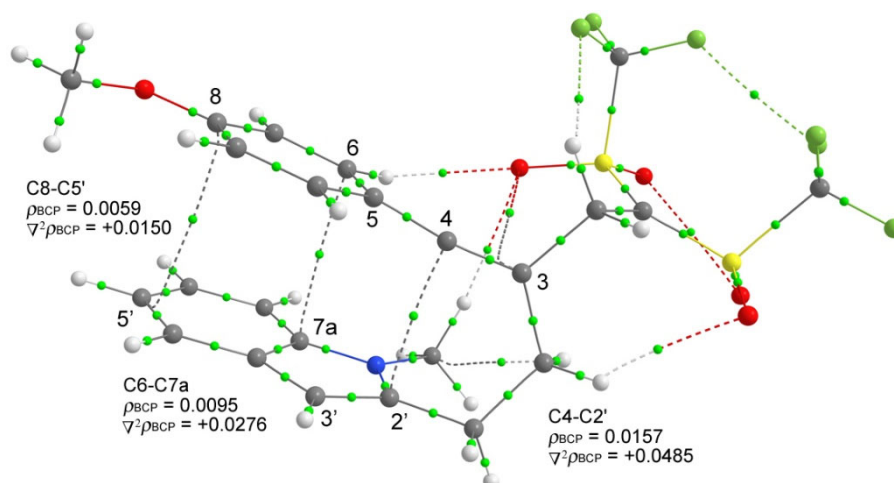

**Figure S1.** Bond paths (dash lines) and BCPs (green spheres) in QTAIM analysis of **INT-1'**. AIM parameters  $\rho$  and  $\nabla^2\rho$  are given in  $e \text{ bohr}^{-3}$  and  $e \text{ bohr}^{-5}$  units, respectively.

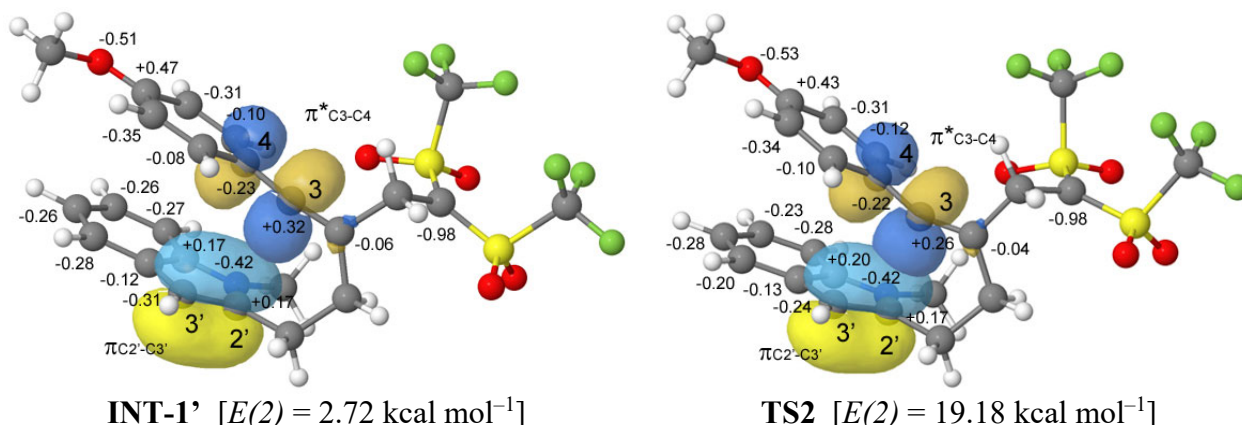

**Figure S2.** Second-order perturbation interactions and NPA charges (in  $e$ ) in INT-1' and TS2

## References

- i. For *Gaussian 09*, Revision D.01, M. J. Frisch, G. W. Trucks, H. B. Schlegel, G. E. Scuseria, M. A. Robb, J. R. Cheeseman, G. Scalmani, V. Barone, B. Mennucci, G. A. Petersson, H. Nakatsuji, M. Caricato, X. Li, H. P. Hratchian, A. F. Izmaylov, J. Bloino, G. Zheng, J. L. Sonnenberg, M. Hada, M. Ehara, K. Toyota, R. Fukuda, J. Hasegawa, M. Ishida, T. Nakajima, Y. Honda, O. Kitao, H. Nakai, T. Vreven, J. A. Montgomery, Jr., J. E. Peralta, F. Ogliaro, M. Bearpark, J. J. Heyd, E. Brothers, K. N. Kudin, V. N. Staroverov, T. Keith, R. Kobayashi, J. Normand, K. Raghavachari, A. Rendell, J. C. Burant, S. S. Iyengar, J. Tomasi, M. Cossi, N. Rega, J. M. Millam, M. Klene, J. E. Knox, J. B. Cross, V. Bakken, C. Adamo, J. Jaramillo, R. Gomperts, R. E. Stratmann, O. Yazyev, A. J. Austin, R. Cammi, C. Pomelli, J. W. Ochterski, R. L. Martin, K. Morokuma, V. G. Zakrzewski, G. A. Voth, P. Salvador, J. J. Dannenberg, S. Dapprich, A. D. Daniels, O. Farkas, J. B. Foresman, J. V. Ortiz, J. Cioslowski, D. J. Fox, Gaussian, Inc., Wallingford CT, 2013.
- ii. Y. Zhao, D. G. Truhlar, *Theor. Chem. Acc.* **2008**, *120*, 215.
- iii. B. Alcaide, P. Almendros, I. Fernández, C. Lázaro-Milla, *Chem. Commun.* **2015**, *51*, 3395.
- iv. For *AIMAll* (Ver. 17.11.14), T. A. Keith, TK Gristmill Software, Overland Park KS, 2017.
- v. For *NBO 6.0*, E. D. Glendening, J. K. Badenhoop, A. E. Reed, J. E. Carpenter, J. A. Bohmann, C. M. Morales, C. R. Landis, F. Weinhold, Theoretical Chemistry Institute, University of Wisconsin, Madison, 2013.

$^1\text{H}$  NMR,  $^{13}\text{C}$  NMR,  $^{19}\text{F}$  NMR and  $^{23}\text{Na}$  NMR Spectra $^1\text{H}$  NMR (300 MHz,  $\text{CDCl}_3$ , 25 °C)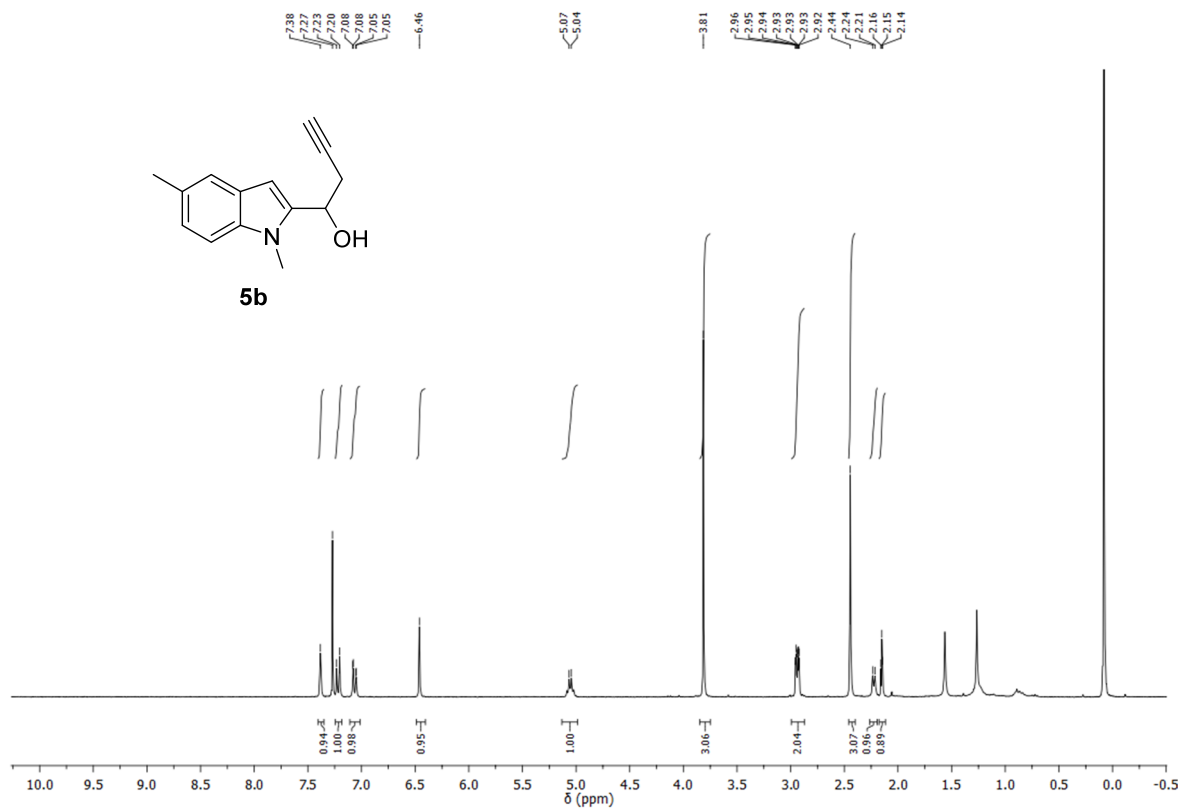 $^{13}\text{C}$  NMR (75 MHz,  $\text{CDCl}_3$ , 25 °C)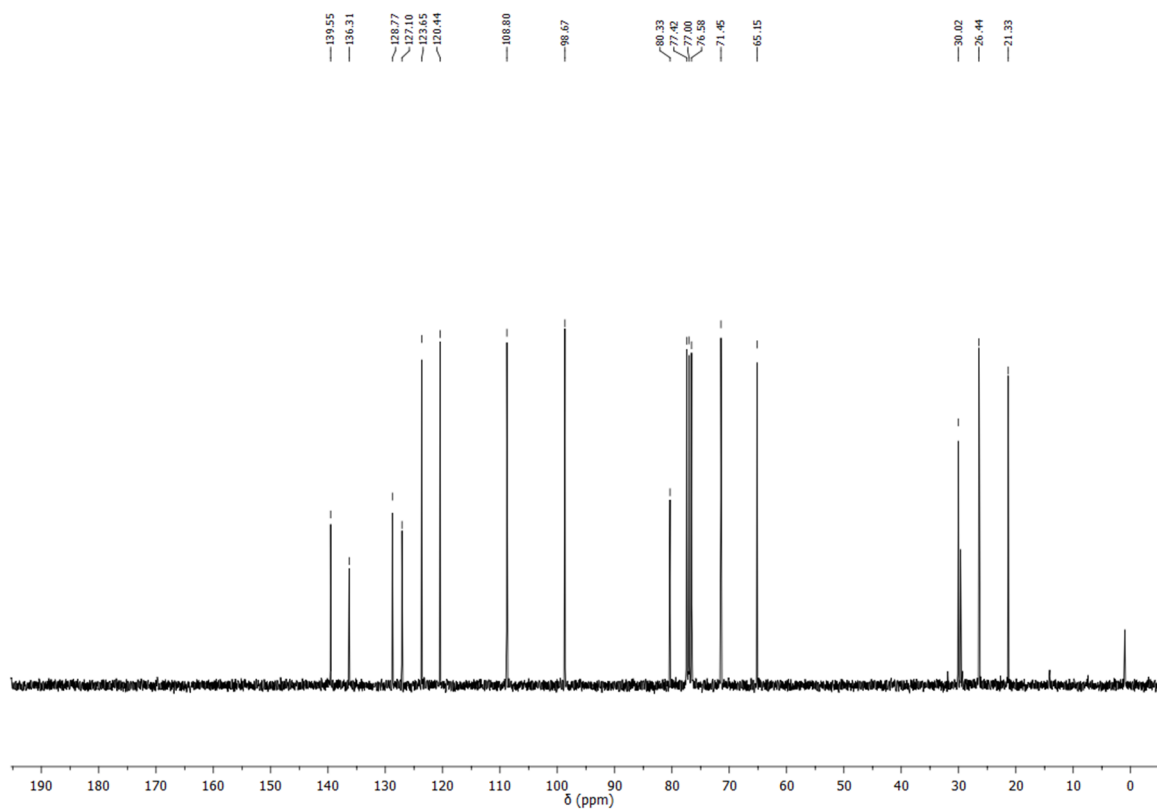

$^1\text{H}$  NMR (300 MHz,  $\text{CDCl}_3$ , 25 °C)

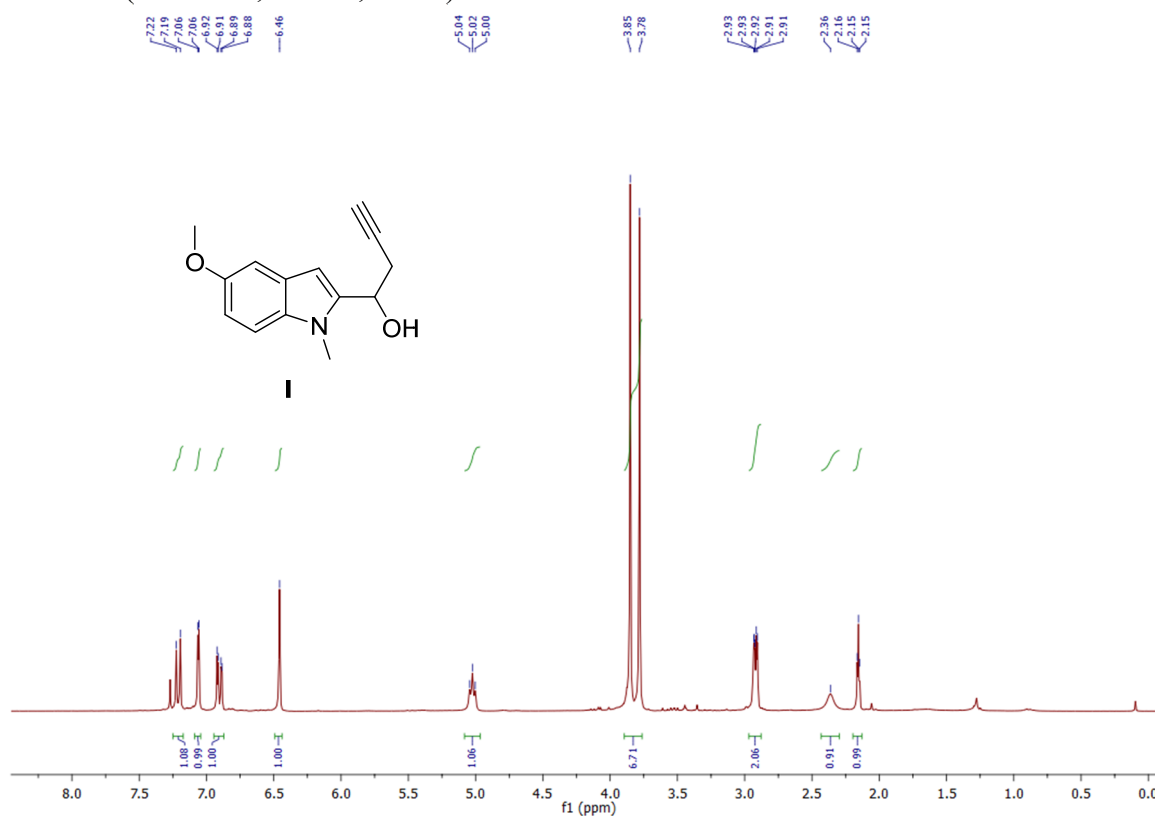

$^{13}\text{C}$  NMR (75 MHz,  $\text{CDCl}_3$ , 25 °C)

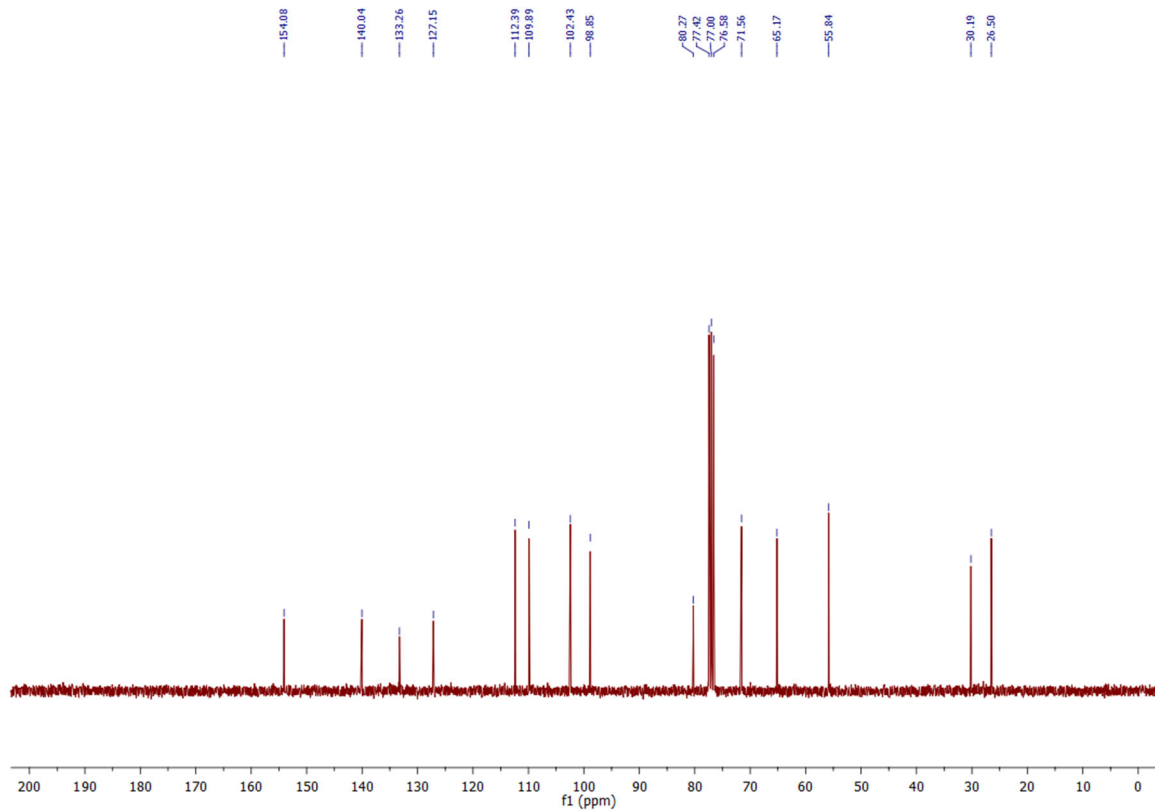

$^1\text{H}$  NMR (300 MHz,  $\text{CDCl}_3$ , 25 °C)

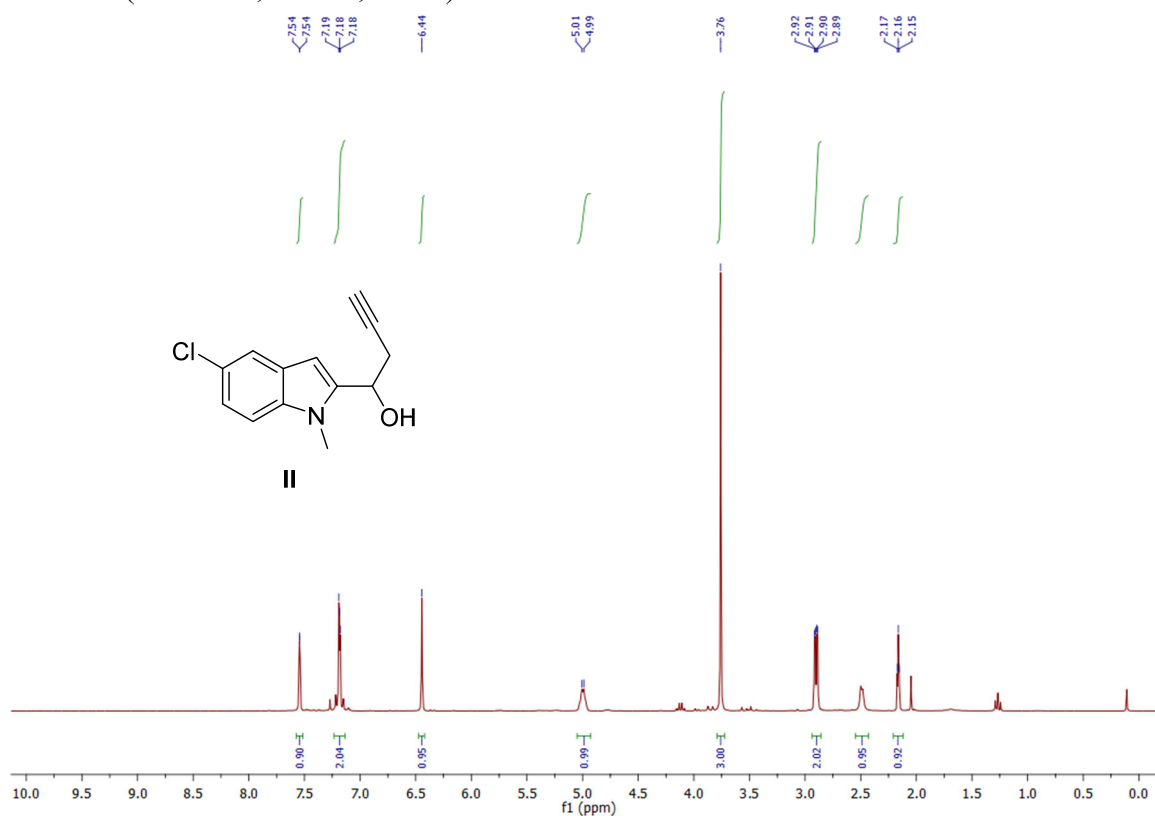

$^{13}\text{C}$  NMR (75 MHz,  $\text{CDCl}_3$ , 25 °C)

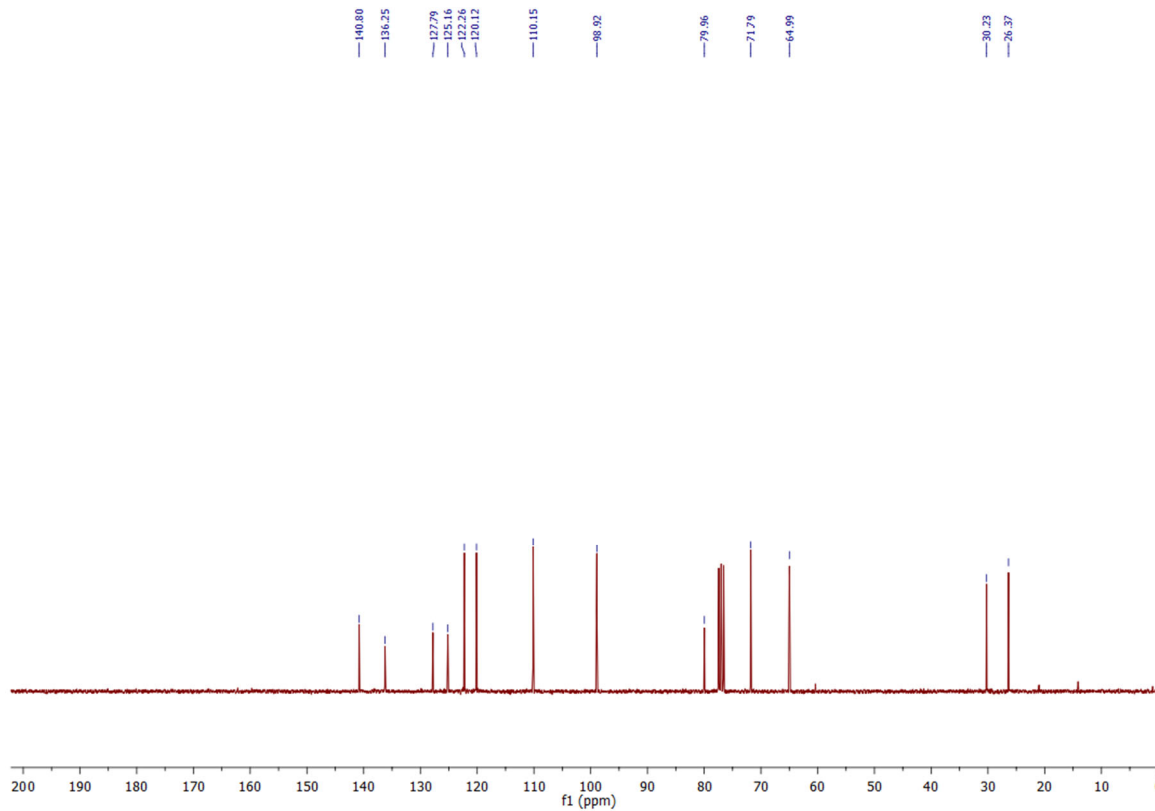



$^1\text{H}$  NMR (300 MHz,  $\text{CDCl}_3$ , 25 °C)

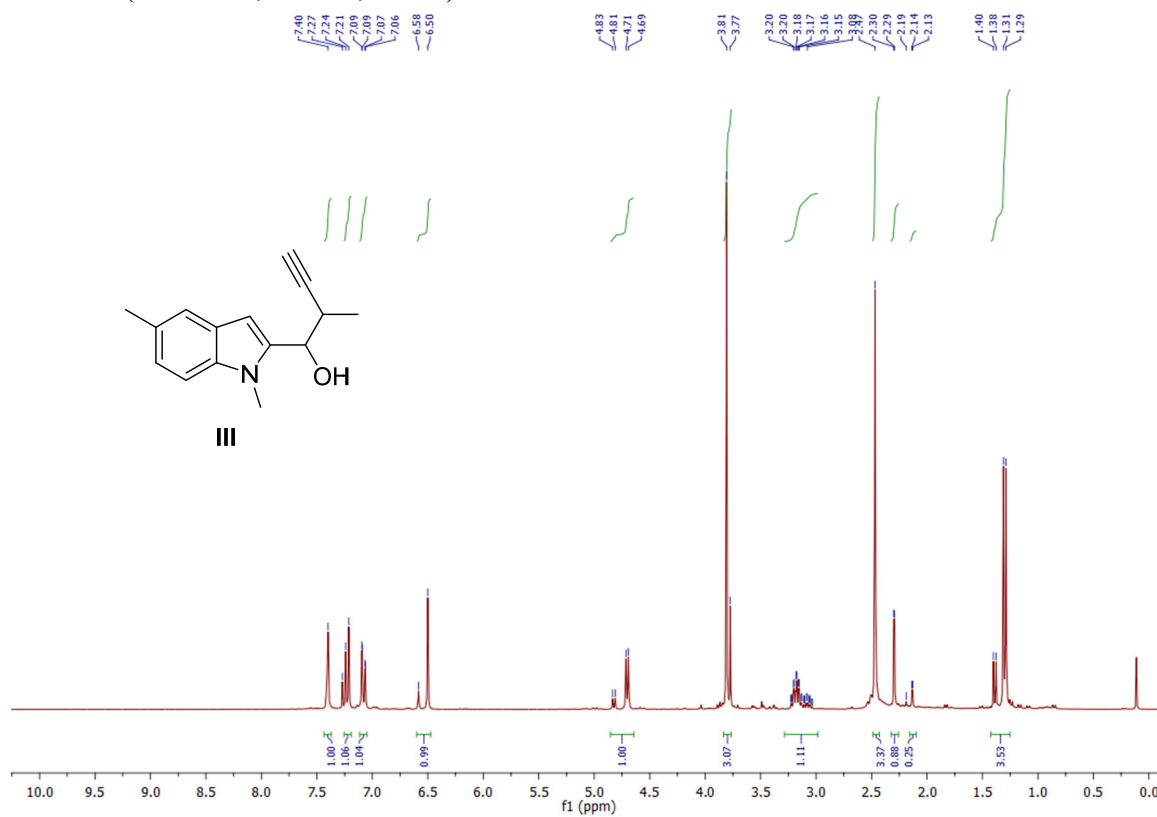

$^{13}\text{C}$  NMR (75 MHz,  $\text{CDCl}_3$ , 25 °C)

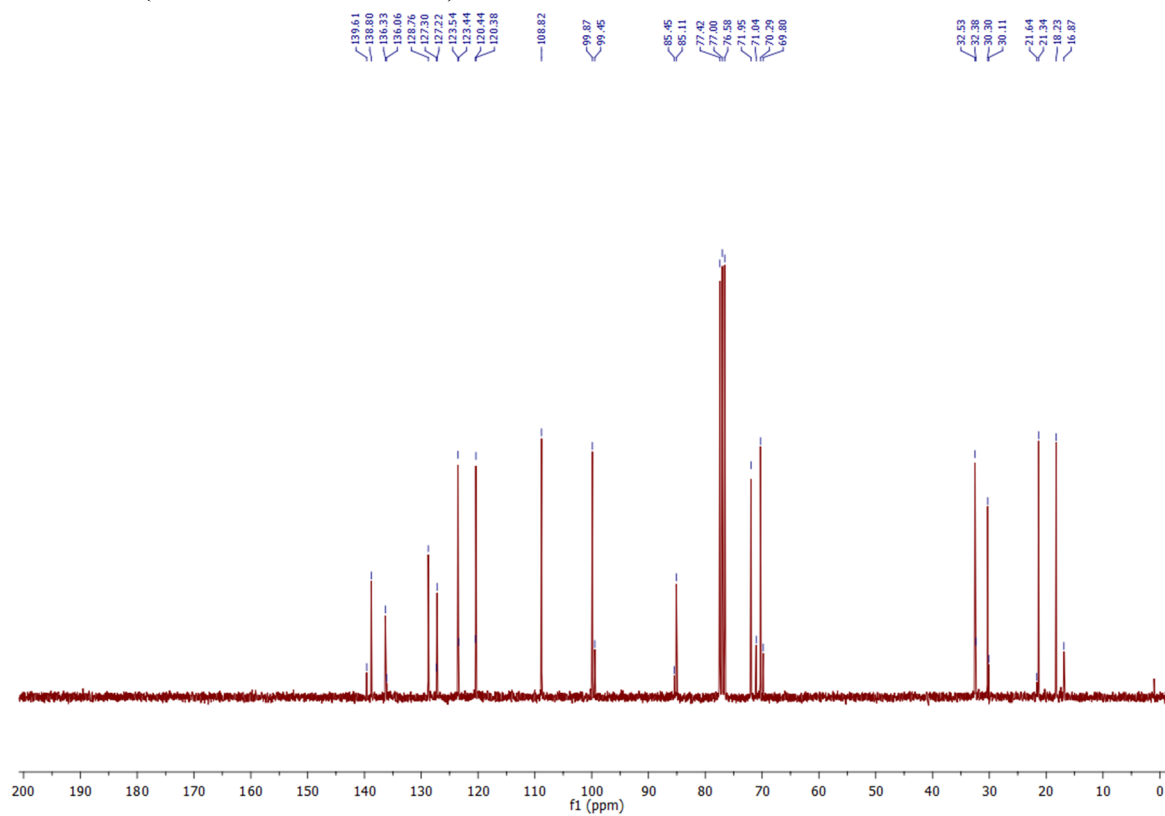

$^1\text{H}$  NMR (400 MHz,  $\text{CDCl}_3$ , rt)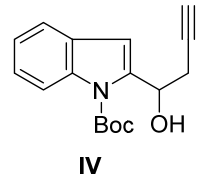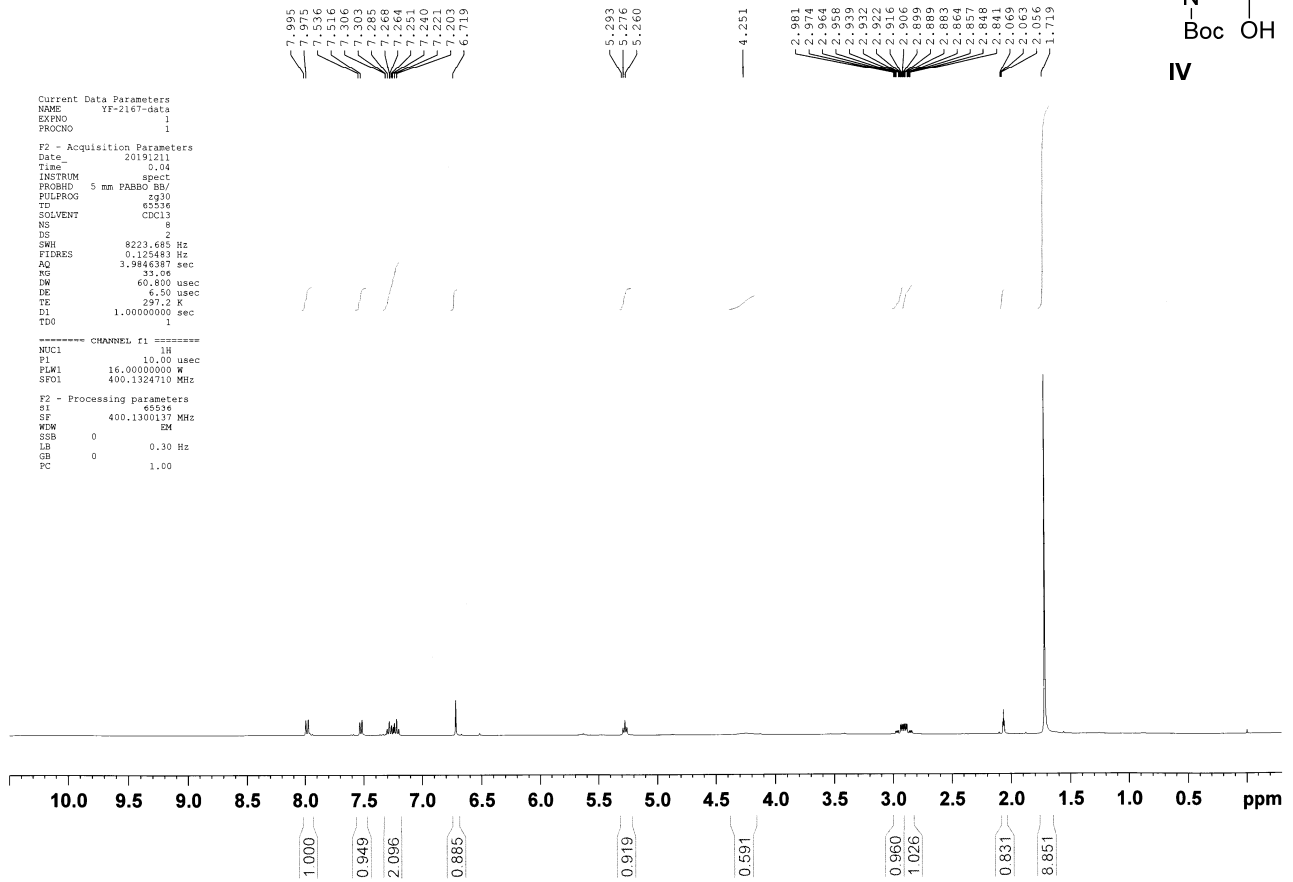

$^{13}\text{C}$  NMR (100 MHz,  $\text{CDCl}_3$ , rt)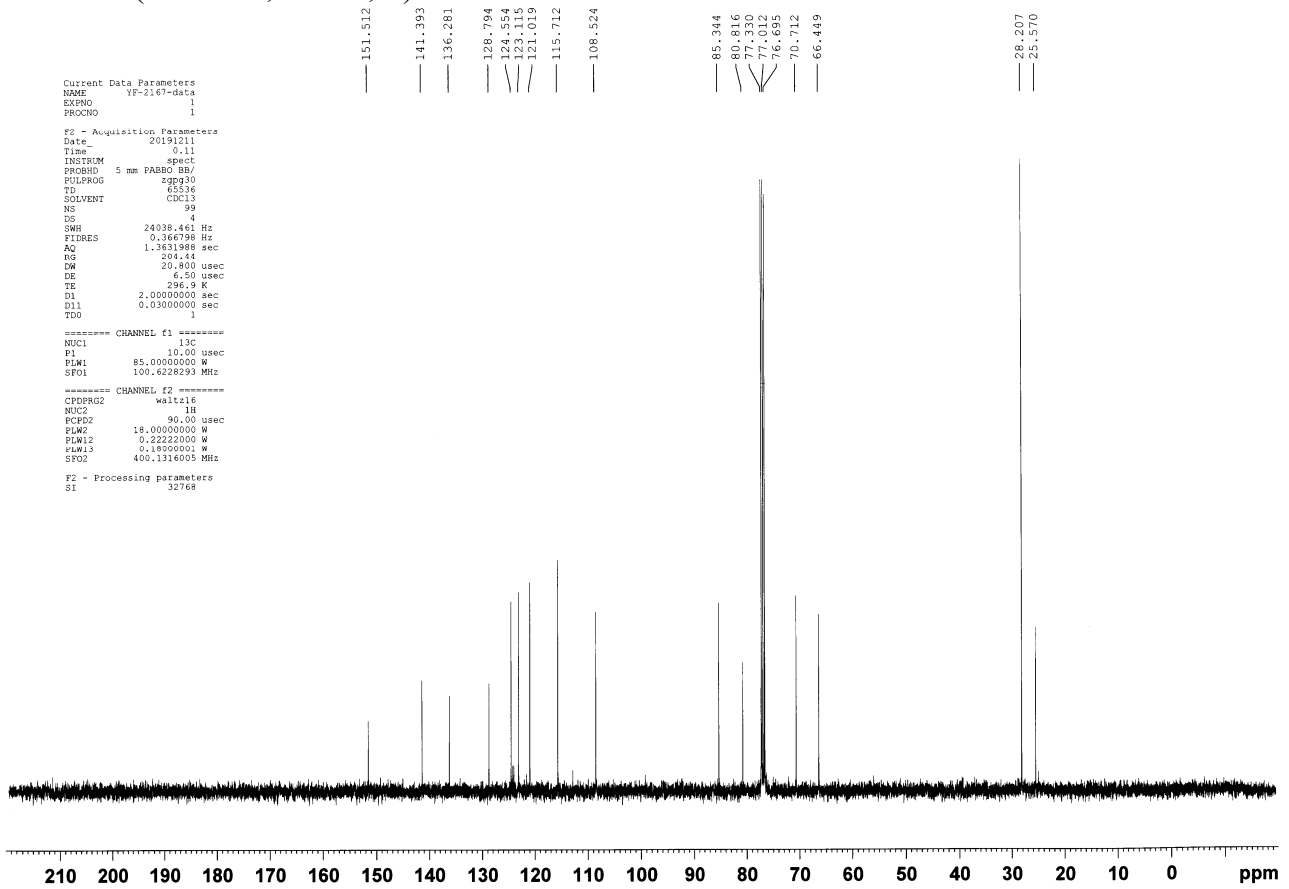

$^1\text{H}$  NMR (300 MHz,  $\text{CDCl}_3$ , 25 °C)

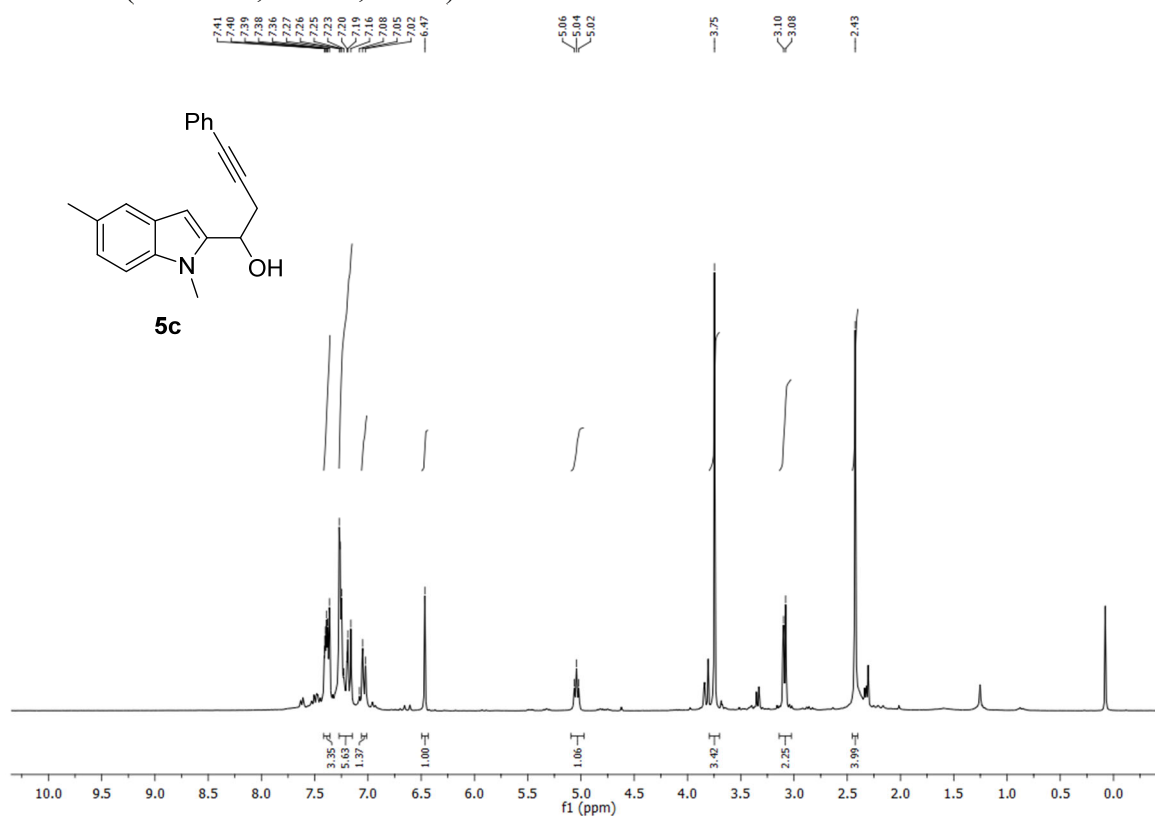

$^{13}\text{C}$  NMR (75 MHz,  $\text{CDCl}_3$ , 25 °C)

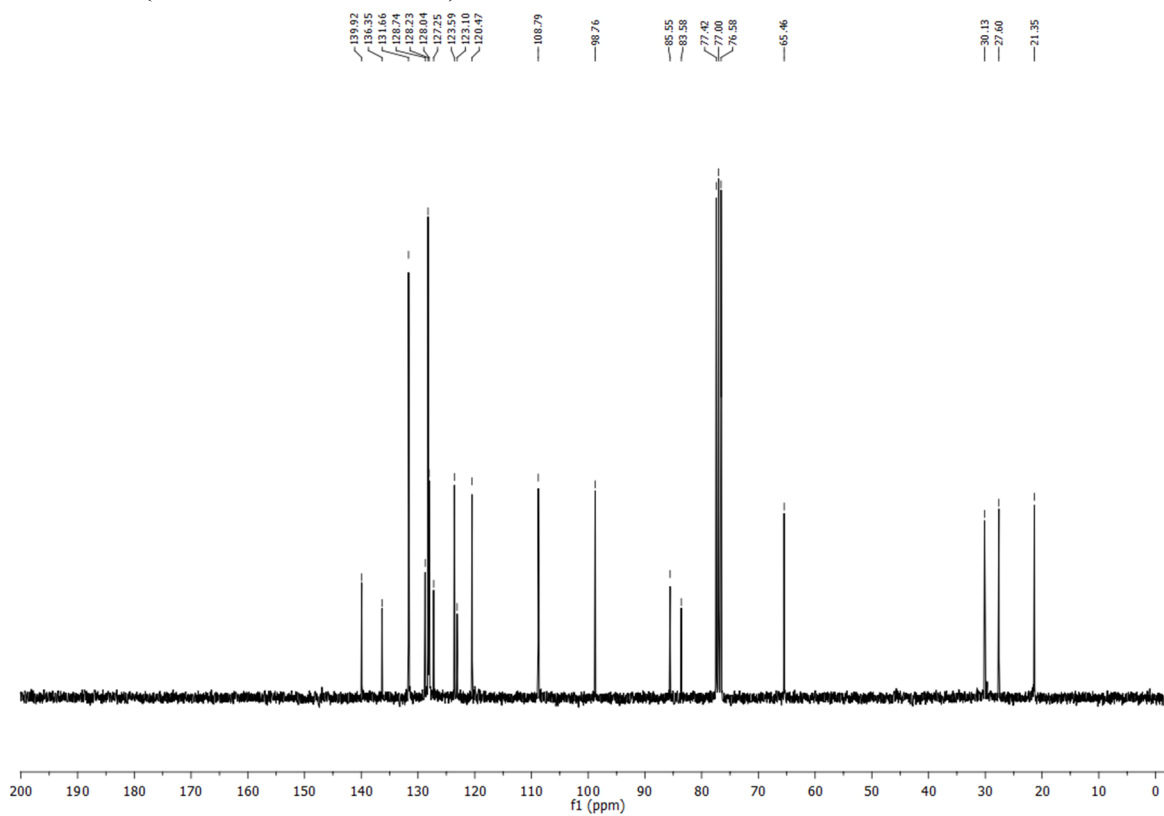

$^1\text{H}$  NMR (300 MHz,  $\text{CDCl}_3$ , 25 °C)

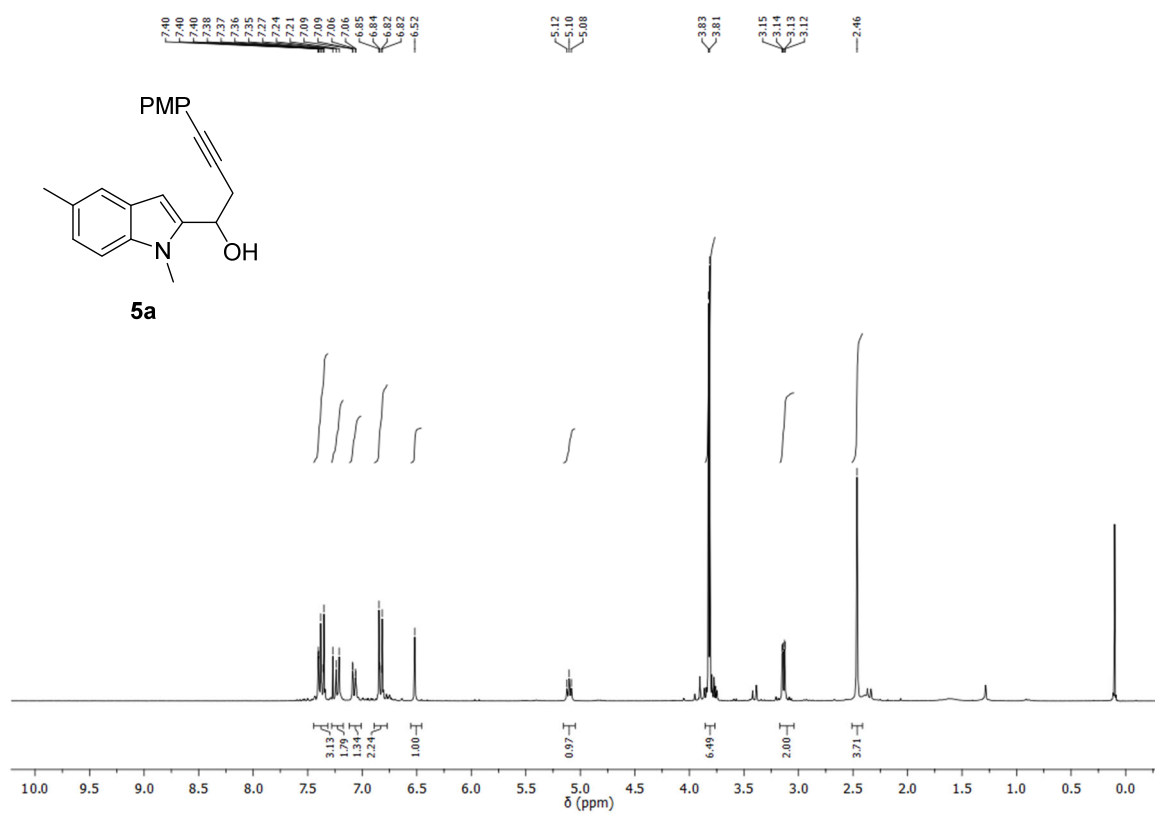

$^{13}\text{C}$  NMR (75 MHz,  $\text{CDCl}_3$ , 25 °C)

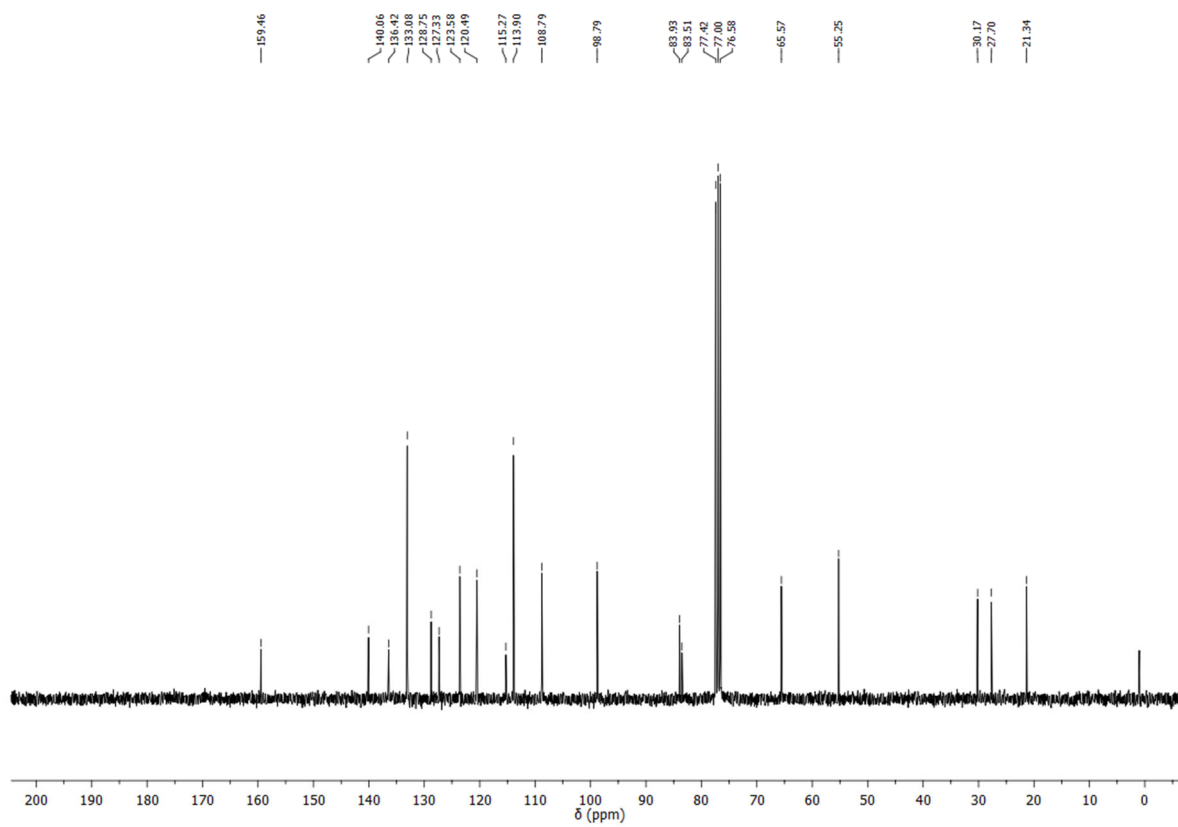

$^1\text{H}$  NMR (300 MHz,  $\text{CDCl}_3$ , 25 °C)

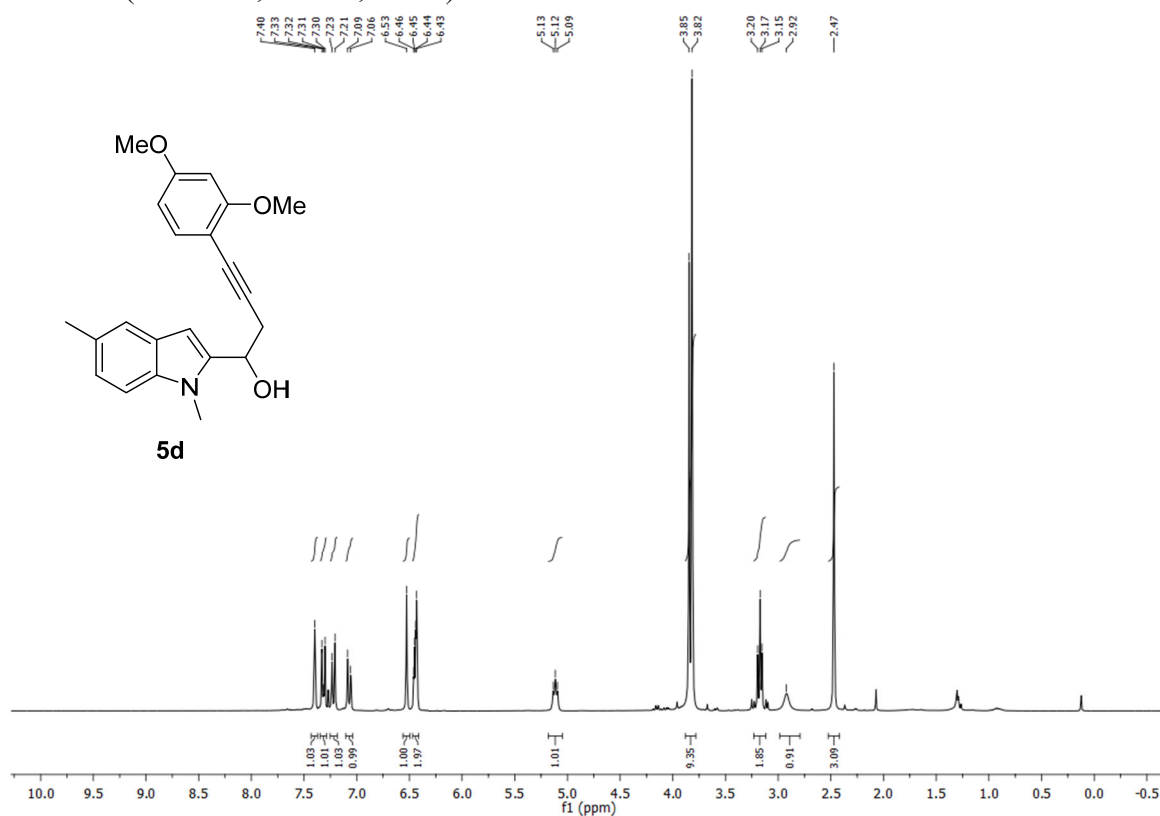

$^{13}\text{C}$  NMR (75 MHz,  $\text{CDCl}_3$ , 25 °C)

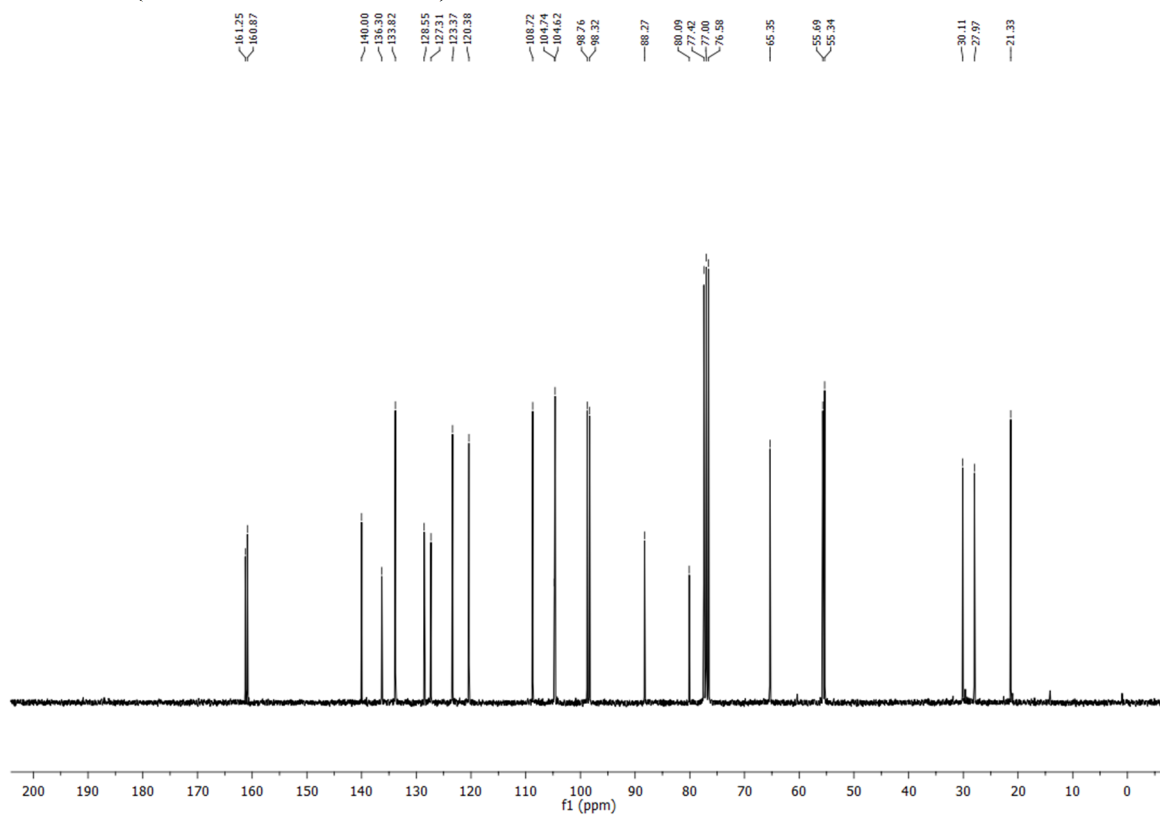

$^1\text{H}$  NMR (300 MHz,  $\text{CDCl}_3$ , 25 °C)

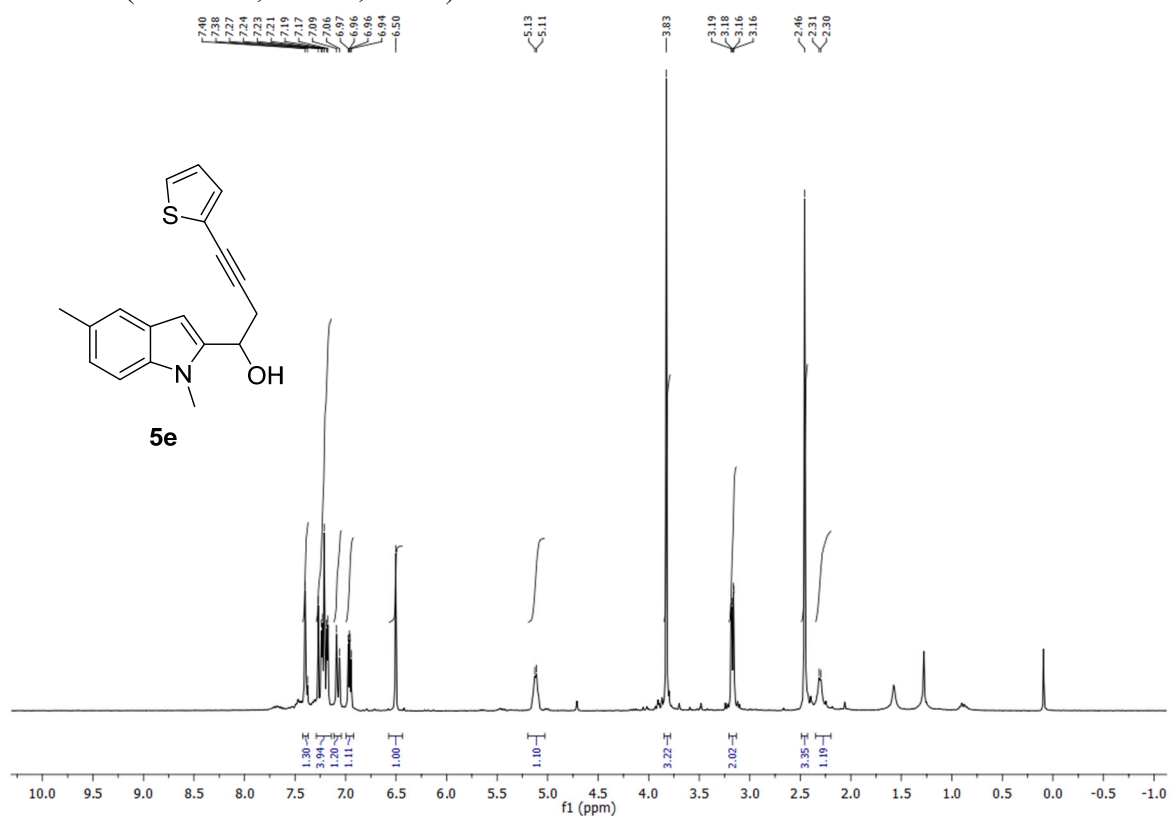

$^{13}\text{C}$  NMR (75 MHz,  $\text{CDCl}_3$ , 25 °C)

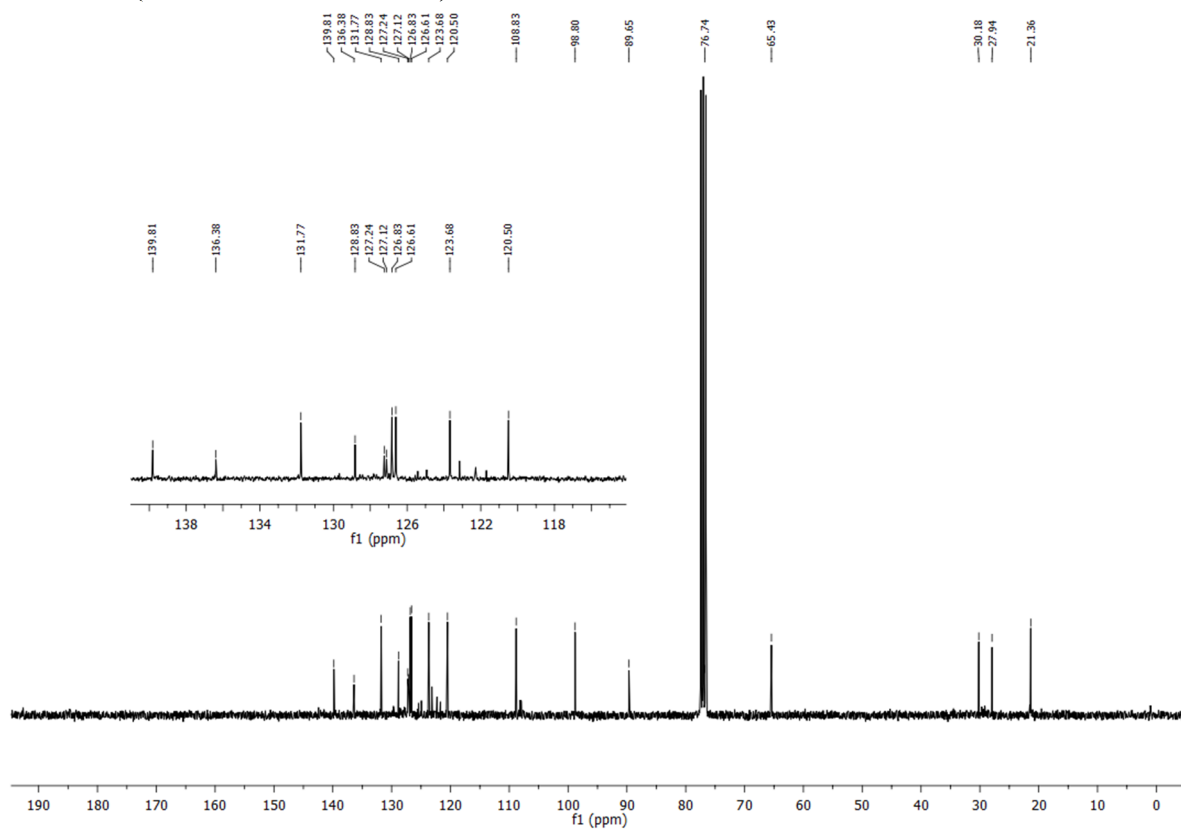

$^1\text{H}$  NMR (300 MHz,  $\text{CDCl}_3$ , 25 °C)

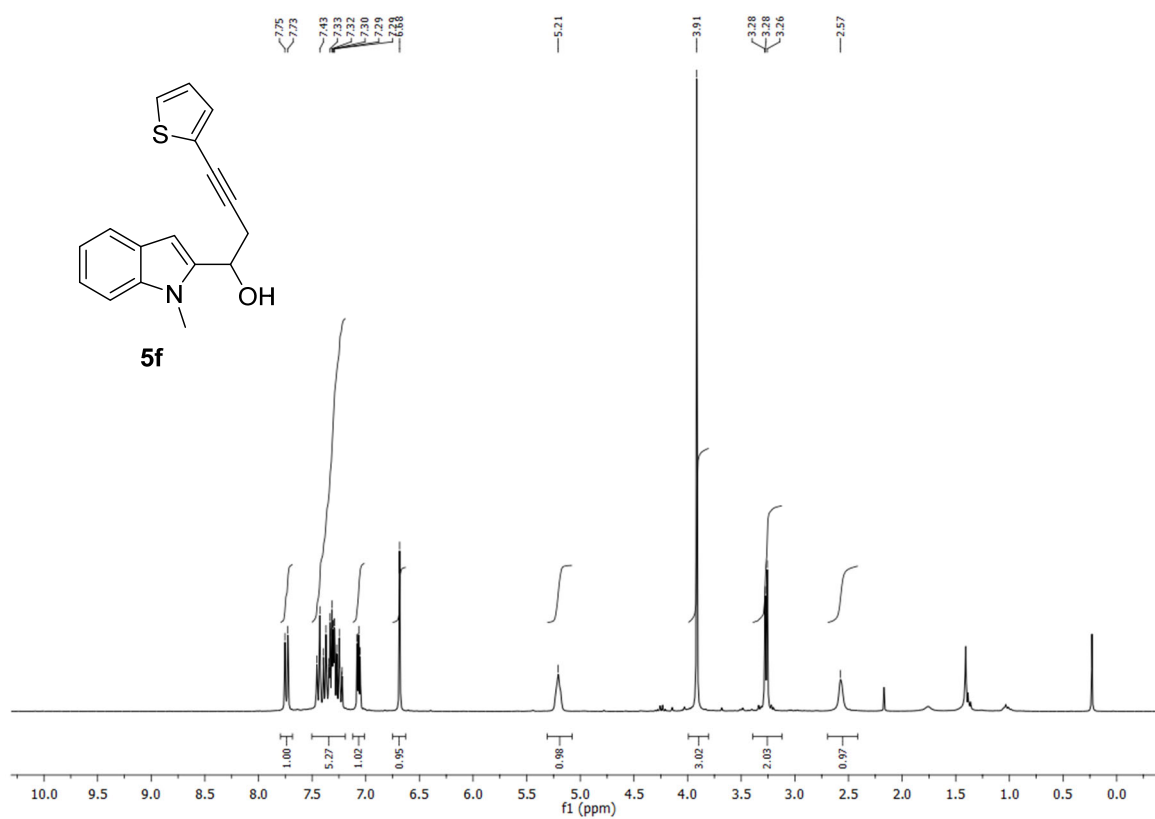

$^{13}\text{C}$  NMR (75 MHz,  $\text{CDCl}_3$ , 25 °C)

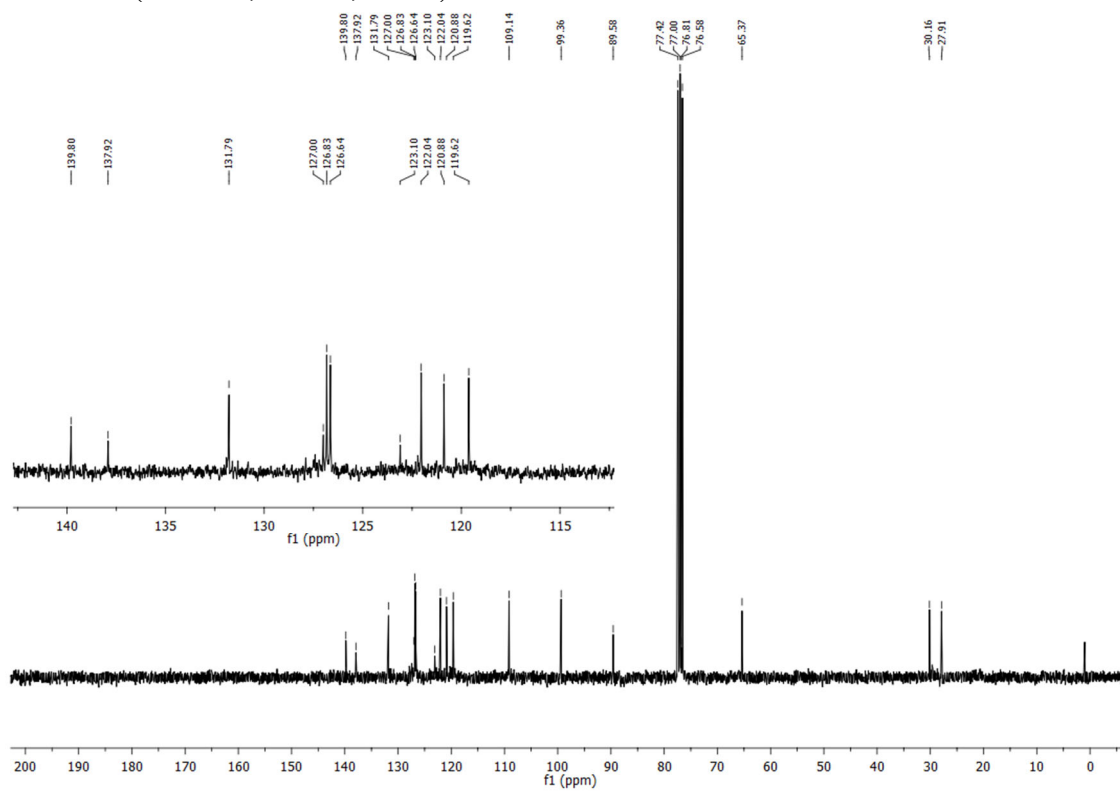



$^1\text{H}$  NMR (300MHz,  $\text{CDCl}_3$ , 25°C)

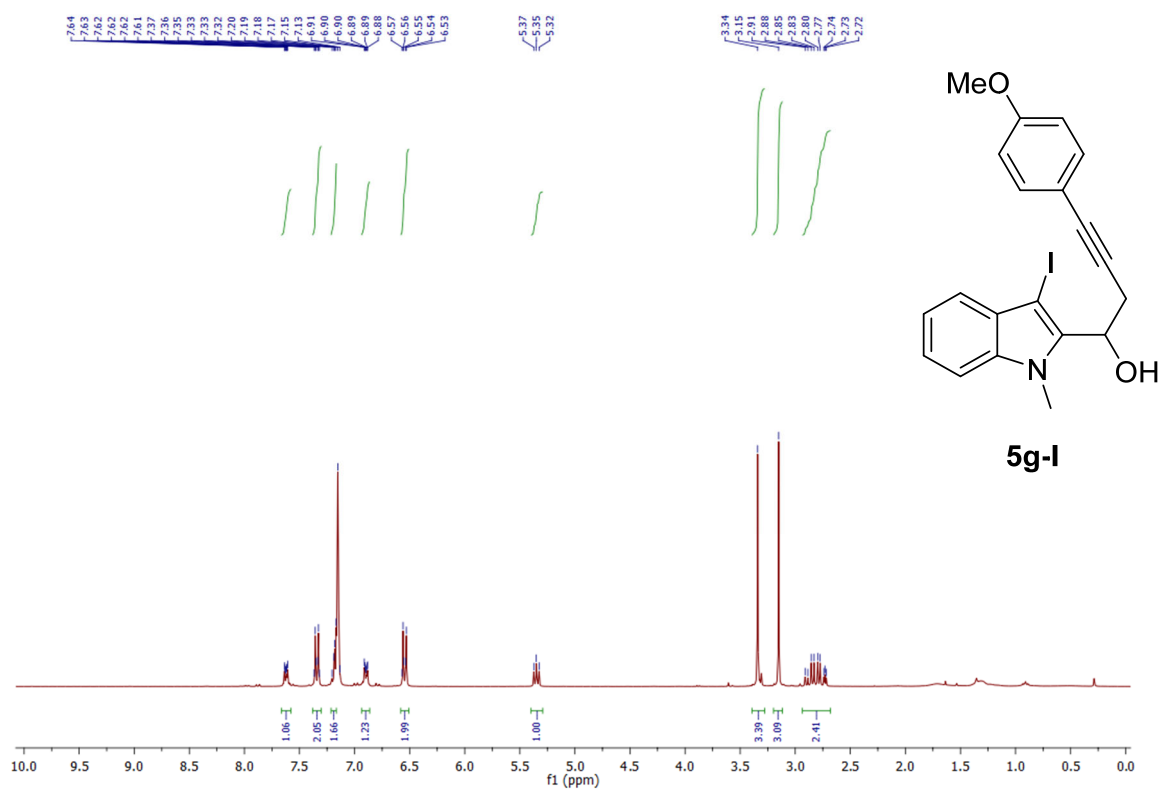

$^{13}\text{C}$  NMR ((75 MHz,  $\text{CDCl}_3$ , 25 °C)

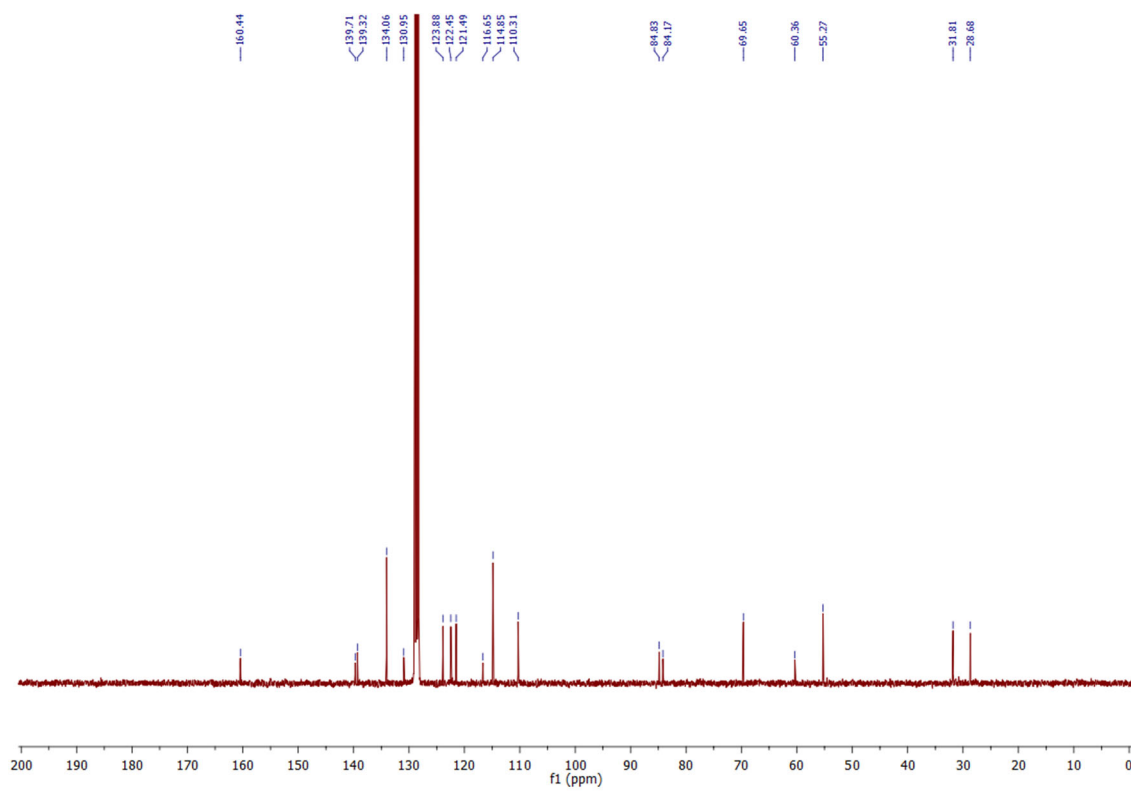

$^1\text{H}$  NMR (300MHz,  $\text{CDCl}_3$ , 25°C)

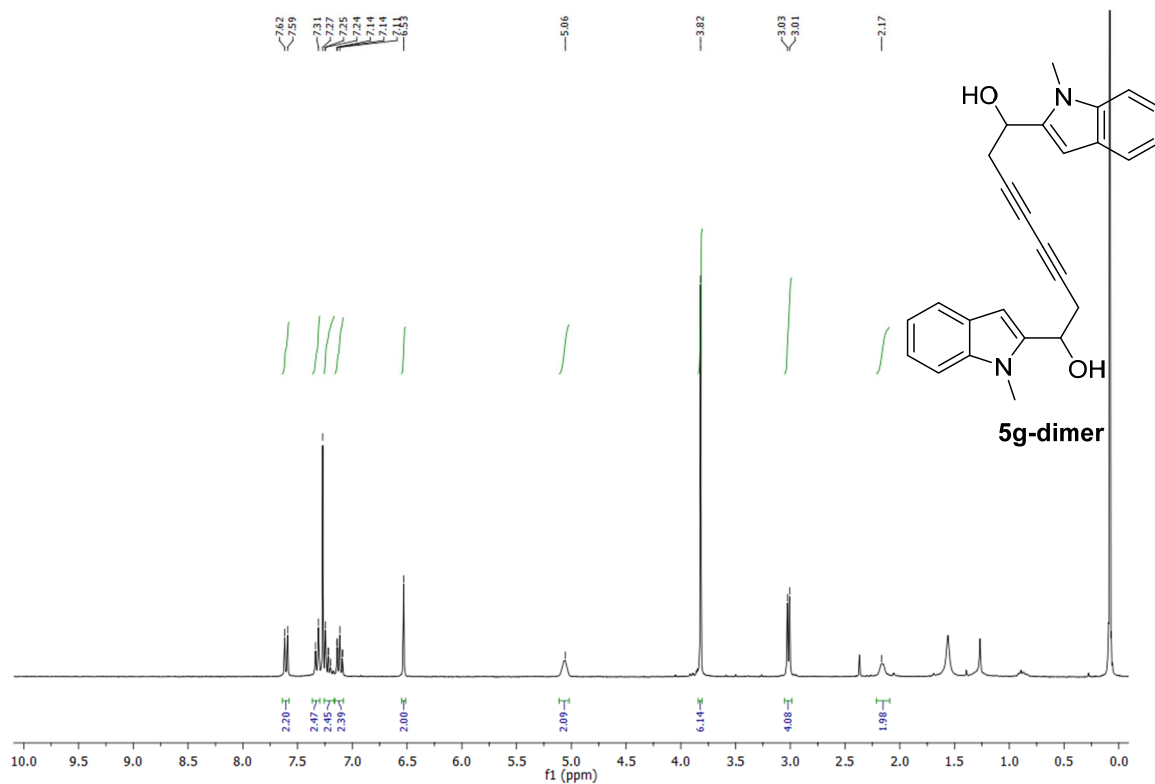

$^{13}\text{C}$  NMR ((75 MHz,  $\text{CDCl}_3$ , 25 °C)

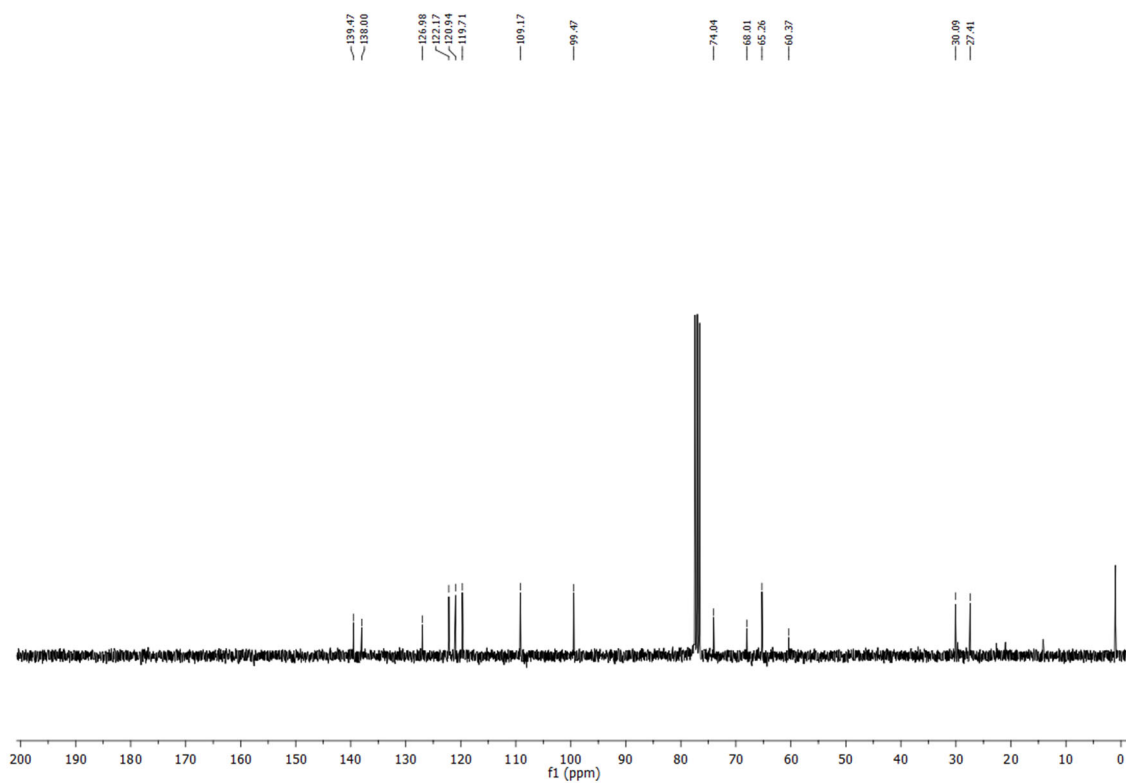

$^1\text{H}$  NMR (300 MHz,  $\text{CDCl}_3$ , 25 °C)

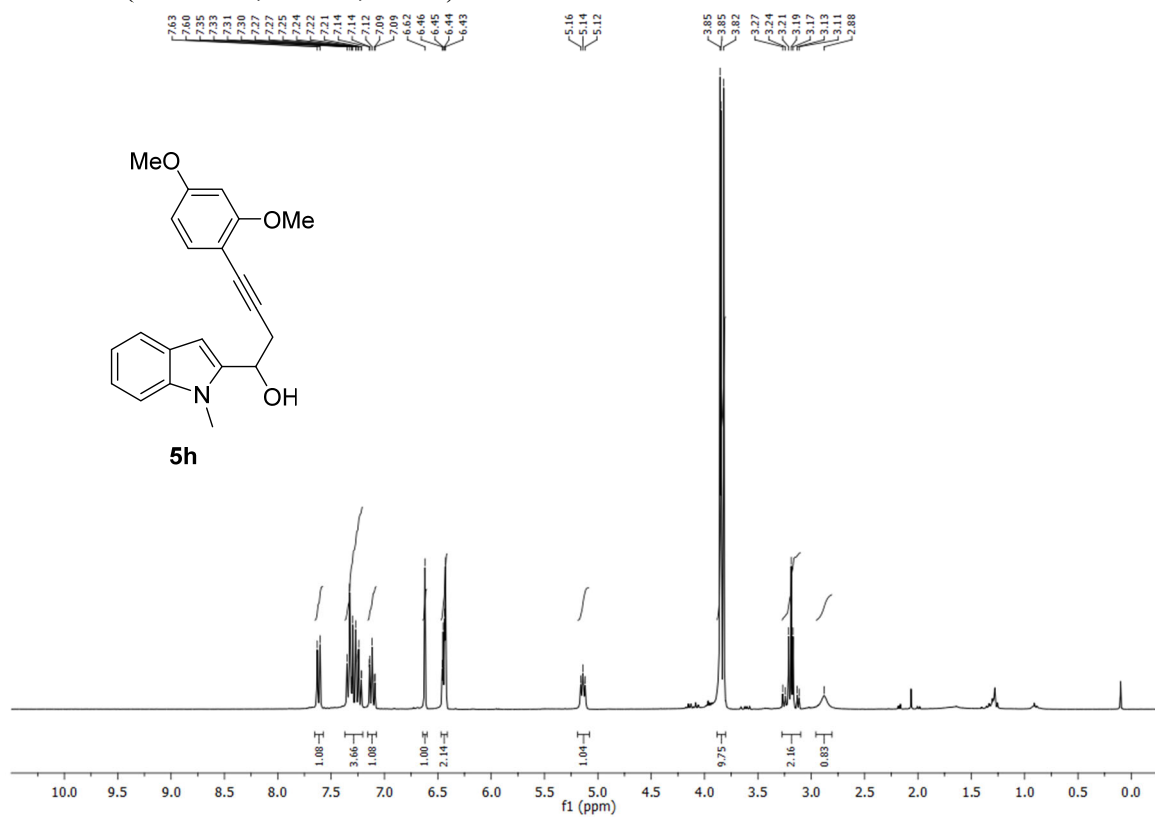

$^{13}\text{C}$  NMR (75 MHz,  $\text{CDCl}_3$ , 25 °C)

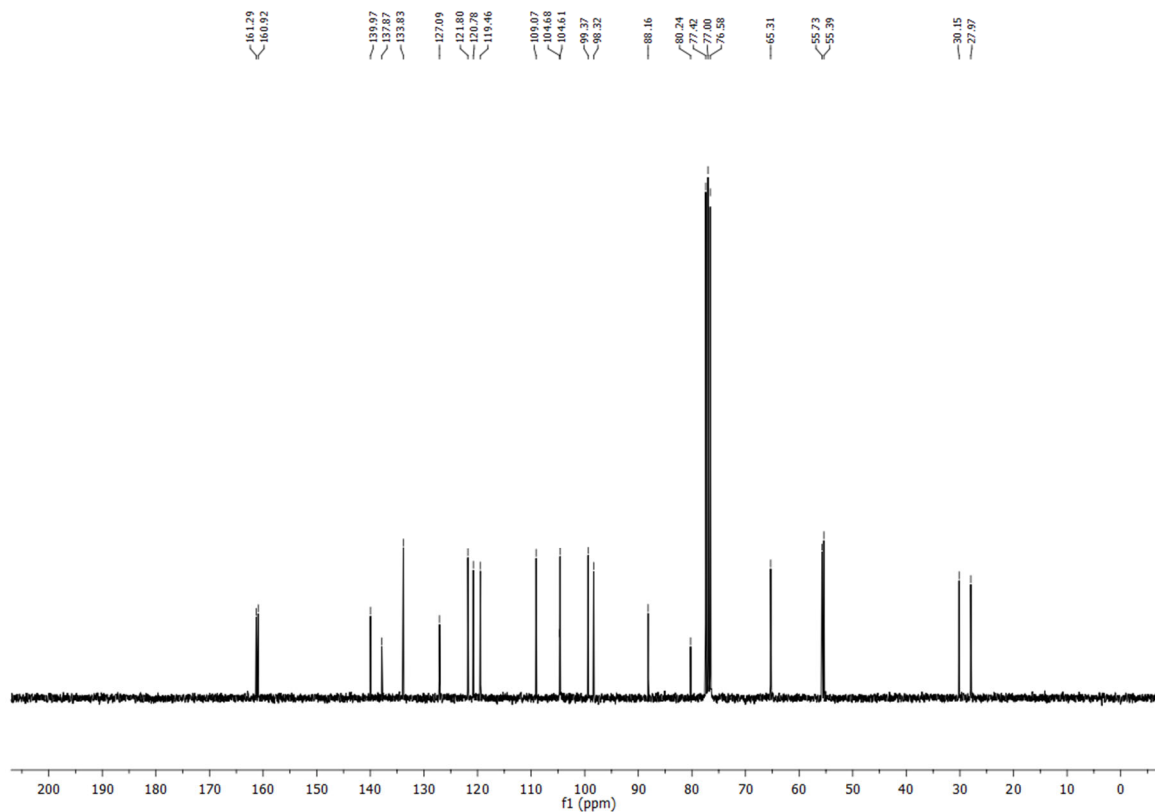

$^1\text{H}$  NMR (300 MHz,  $\text{CDCl}_3$ , 25 °C)

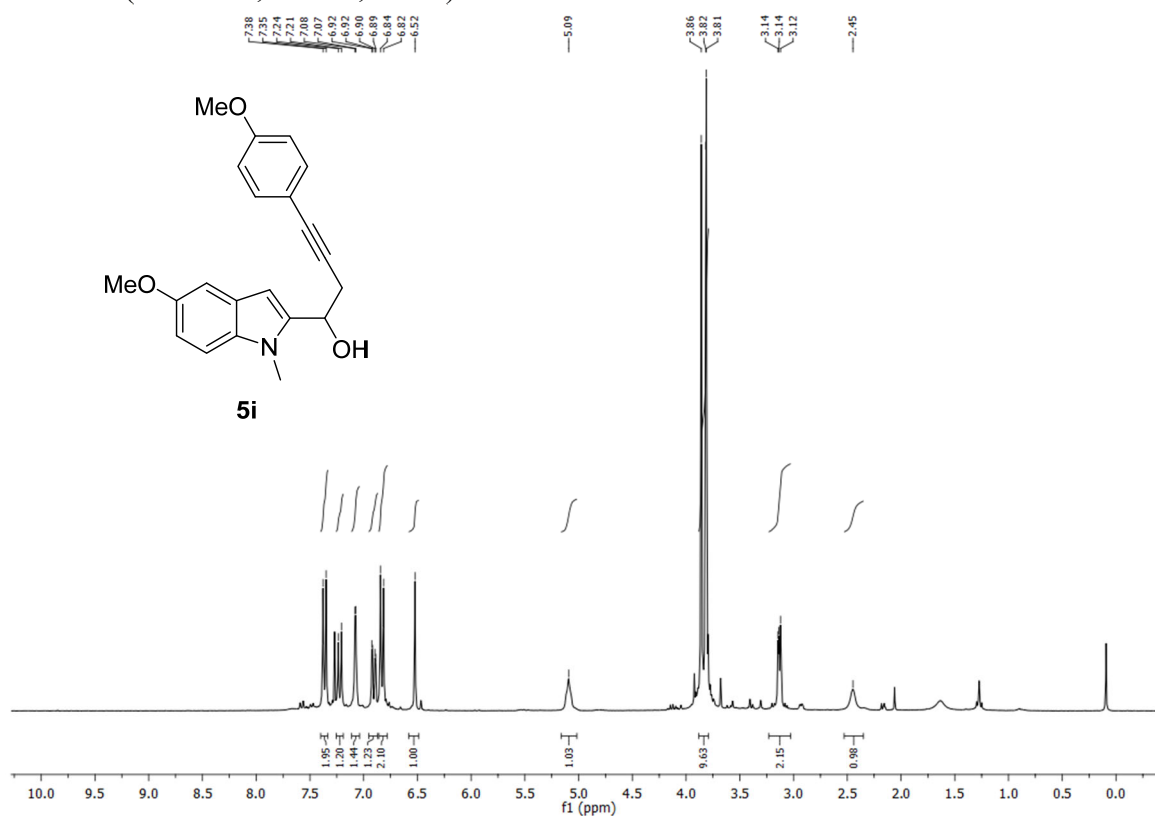

$^{13}\text{C}$  NMR (75 MHz,  $\text{CDCl}_3$ , 25 °C)

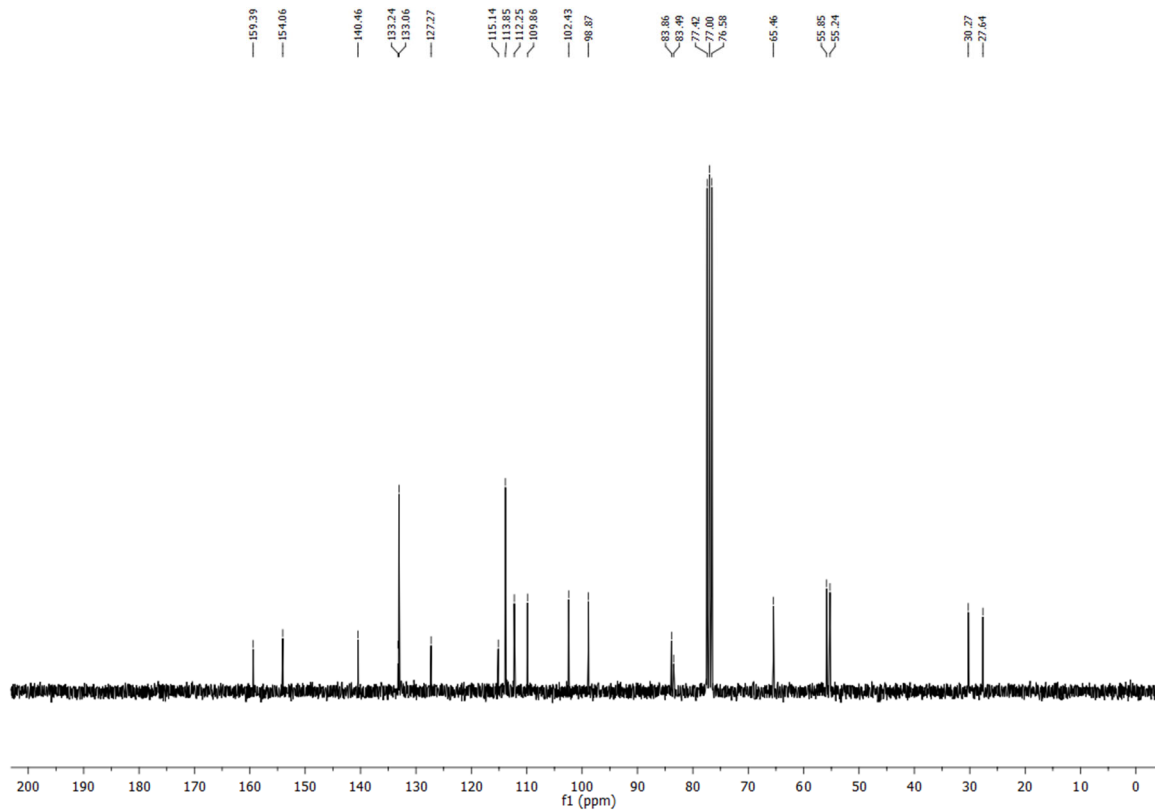

$^1\text{H}$  NMR (300 MHz,  $\text{CDCl}_3$ , 25 °C)

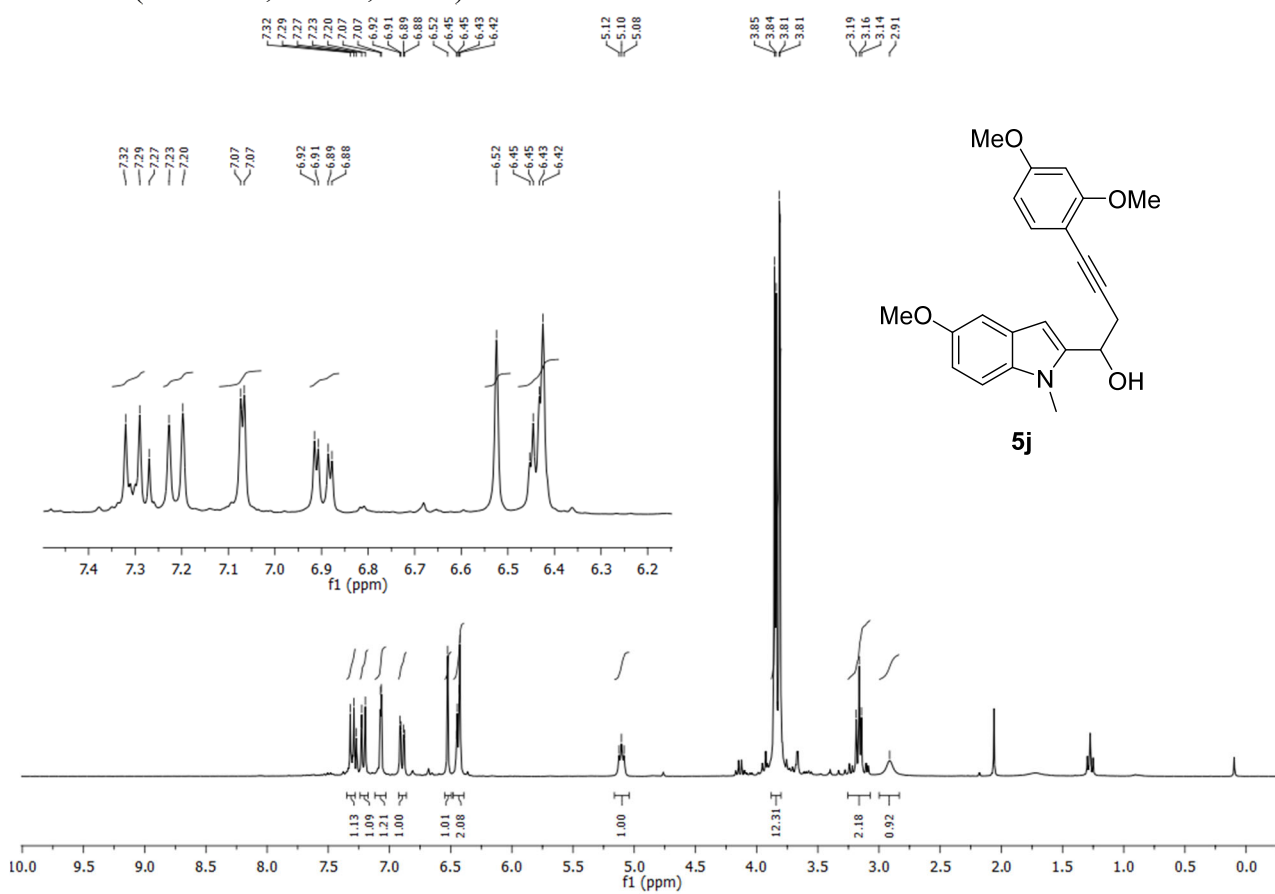

$^{13}\text{C}$  NMR (75 MHz,  $\text{CDCl}_3$ , 25 °C)

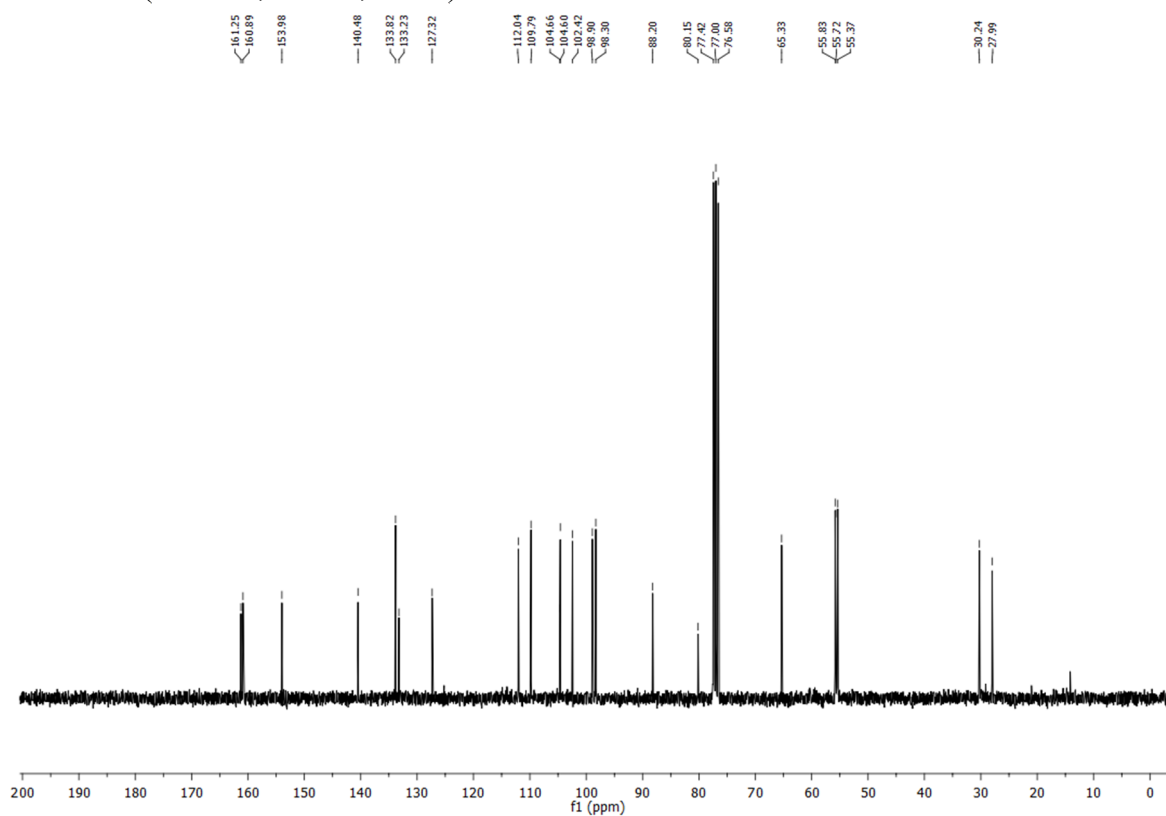

$^1\text{H}$  NMR (300 MHz,  $\text{CDCl}_3$ , 25 °C)

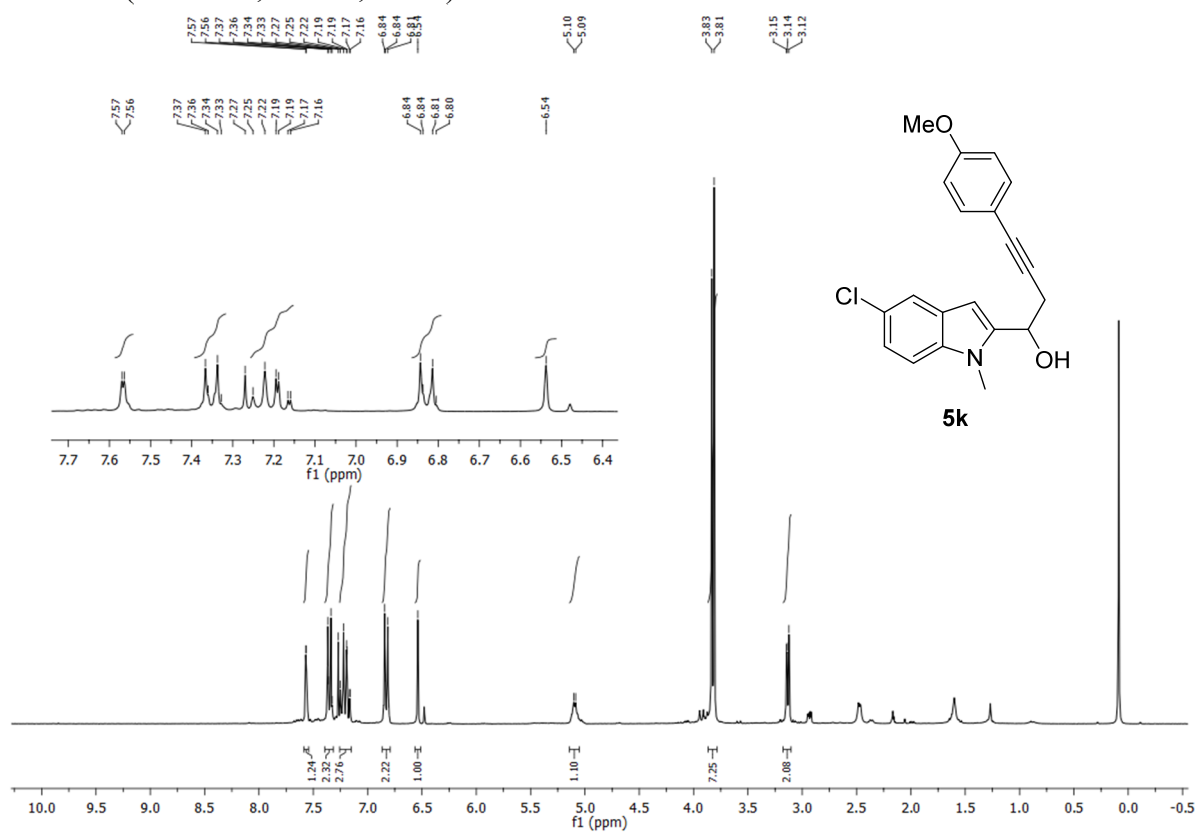

$^{13}\text{C}$  NMR (75 MHz,  $\text{CDCl}_3$ , 25 °C)

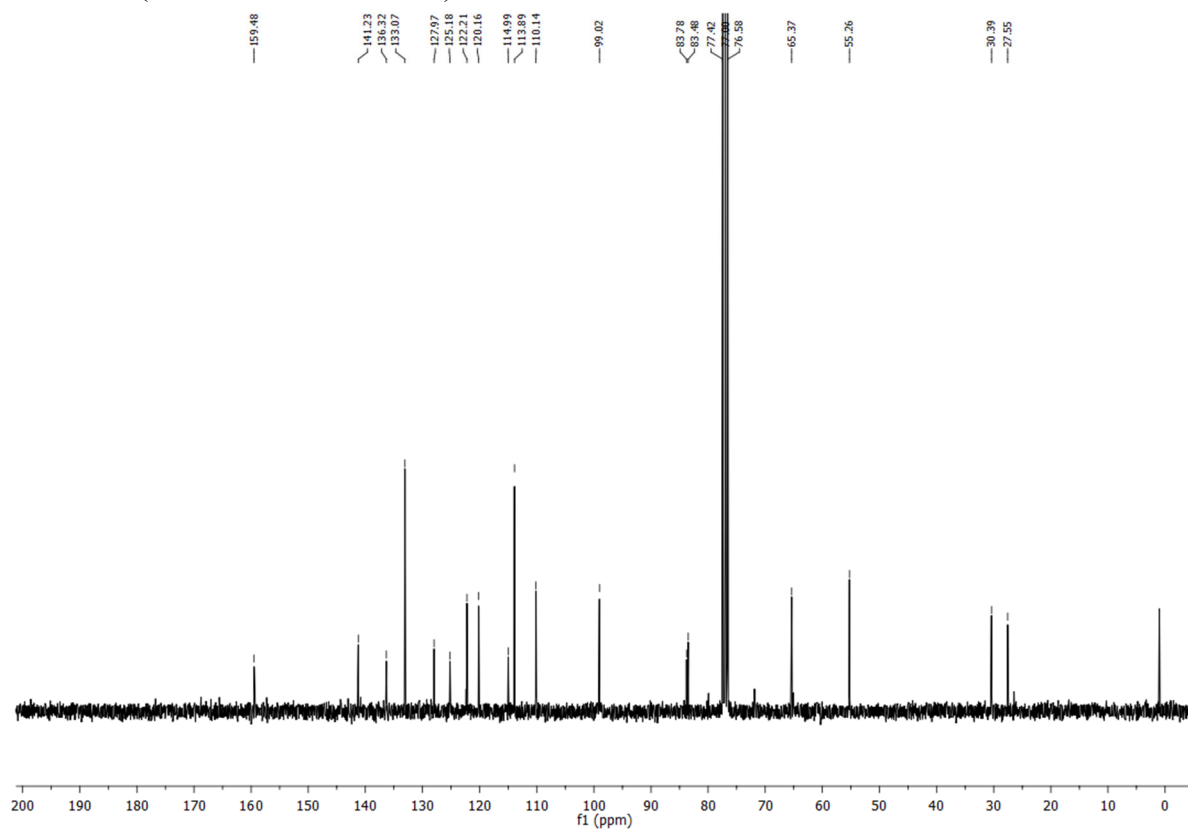

$^1\text{H}$  NMR (300 MHz,  $\text{CDCl}_3$ , 25 °C)

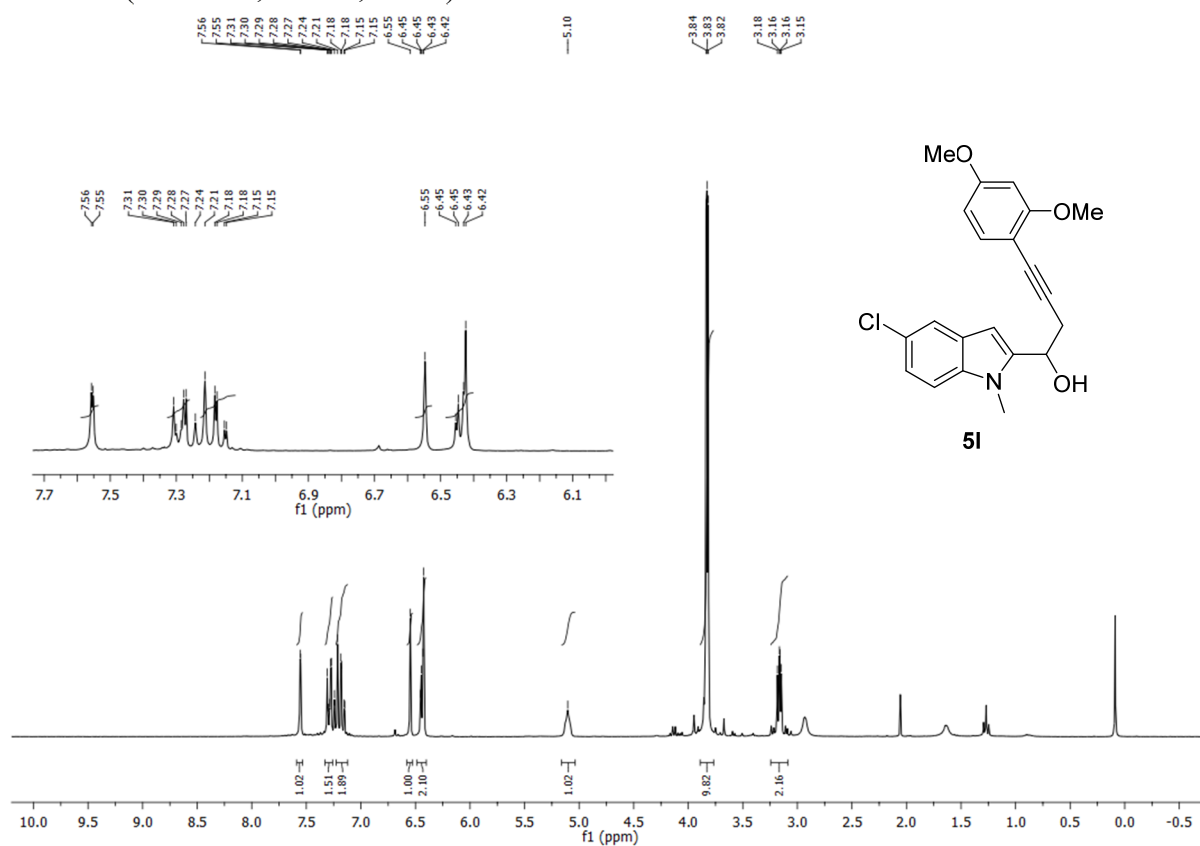

$^{13}\text{C}$  NMR (75 MHz,  $\text{CDCl}_3$ , 25 °C)

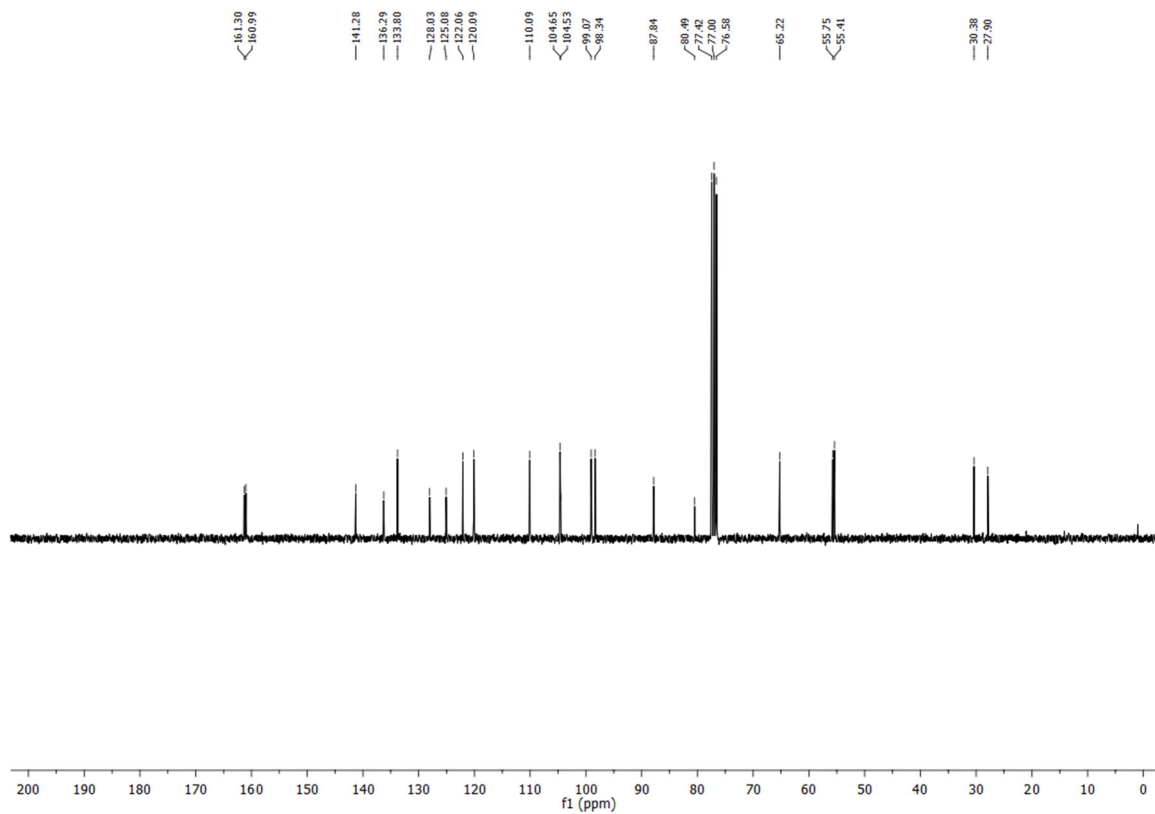

$^1\text{H}$  NMR (300 MHz,  $\text{CDCl}_3$ , 25 °C)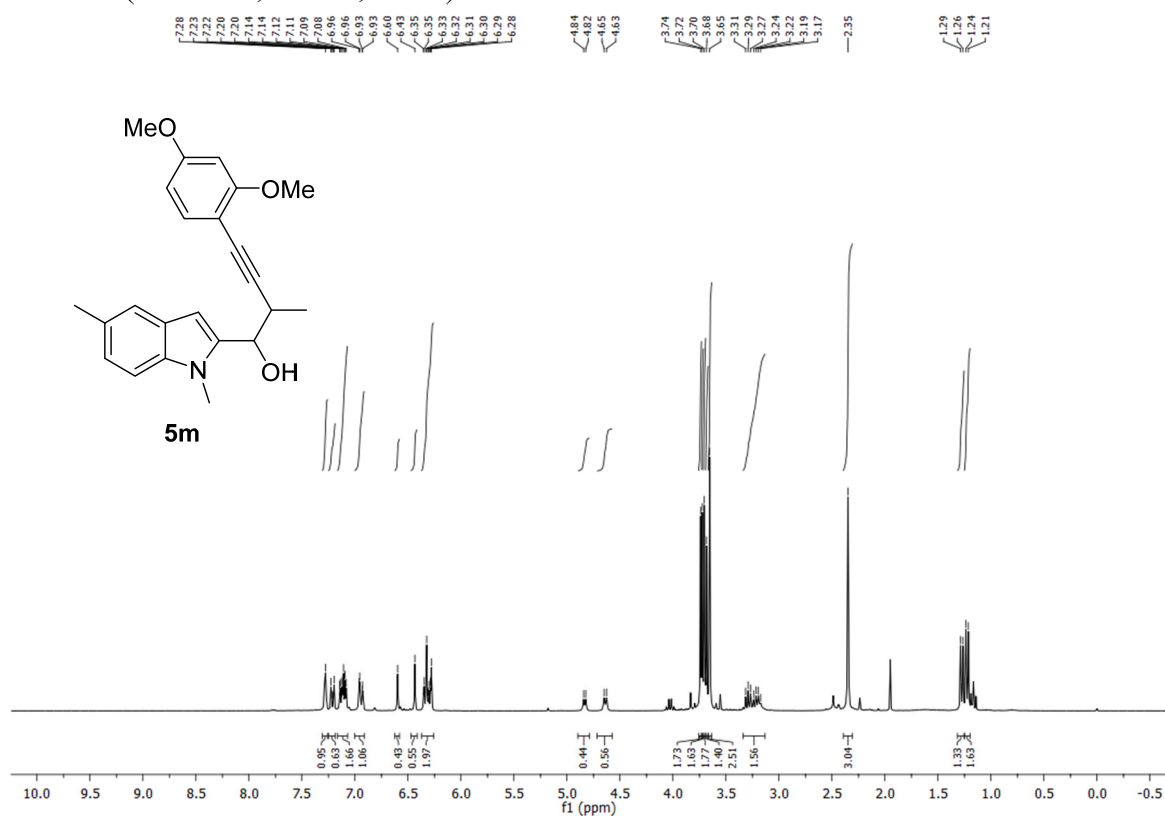 $^{13}\text{C}$  NMR (75 MHz,  $\text{CDCl}_3$ , 25 °C)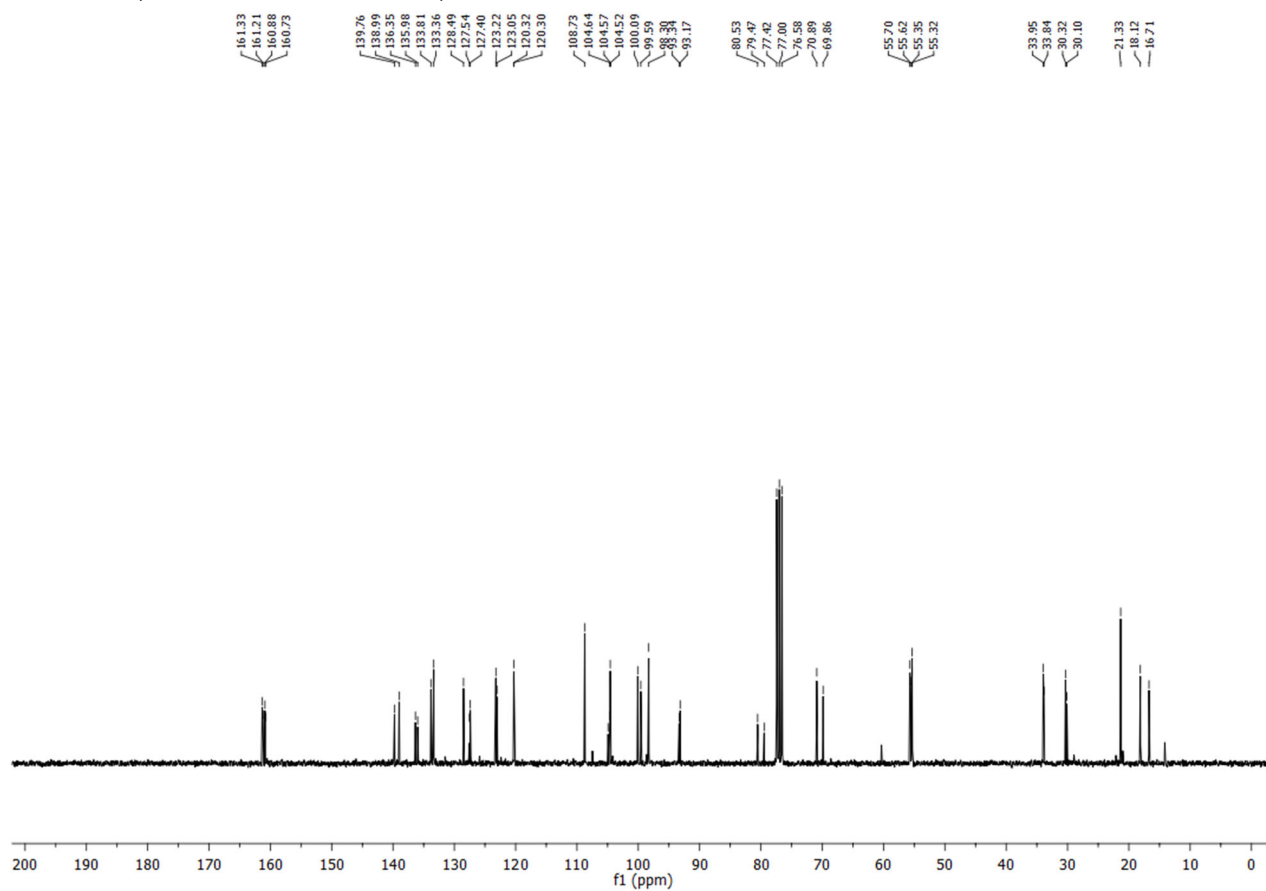



$^1\text{H}$  NMR (400 MHz,  $\text{CDCl}_3$ , rt)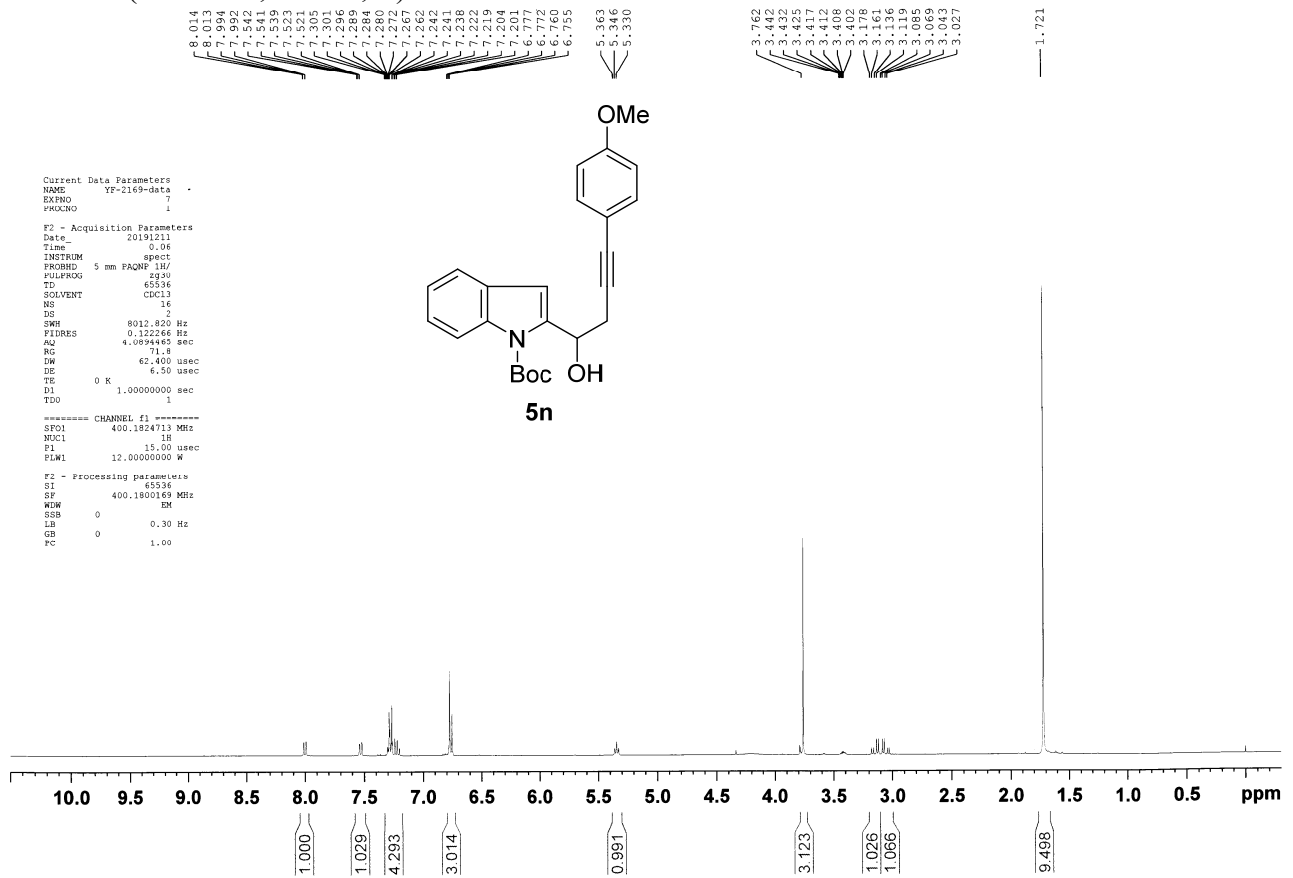

$^{13}\text{C}$  NMR (100 MHz,  $\text{CDCl}_3$ , rt)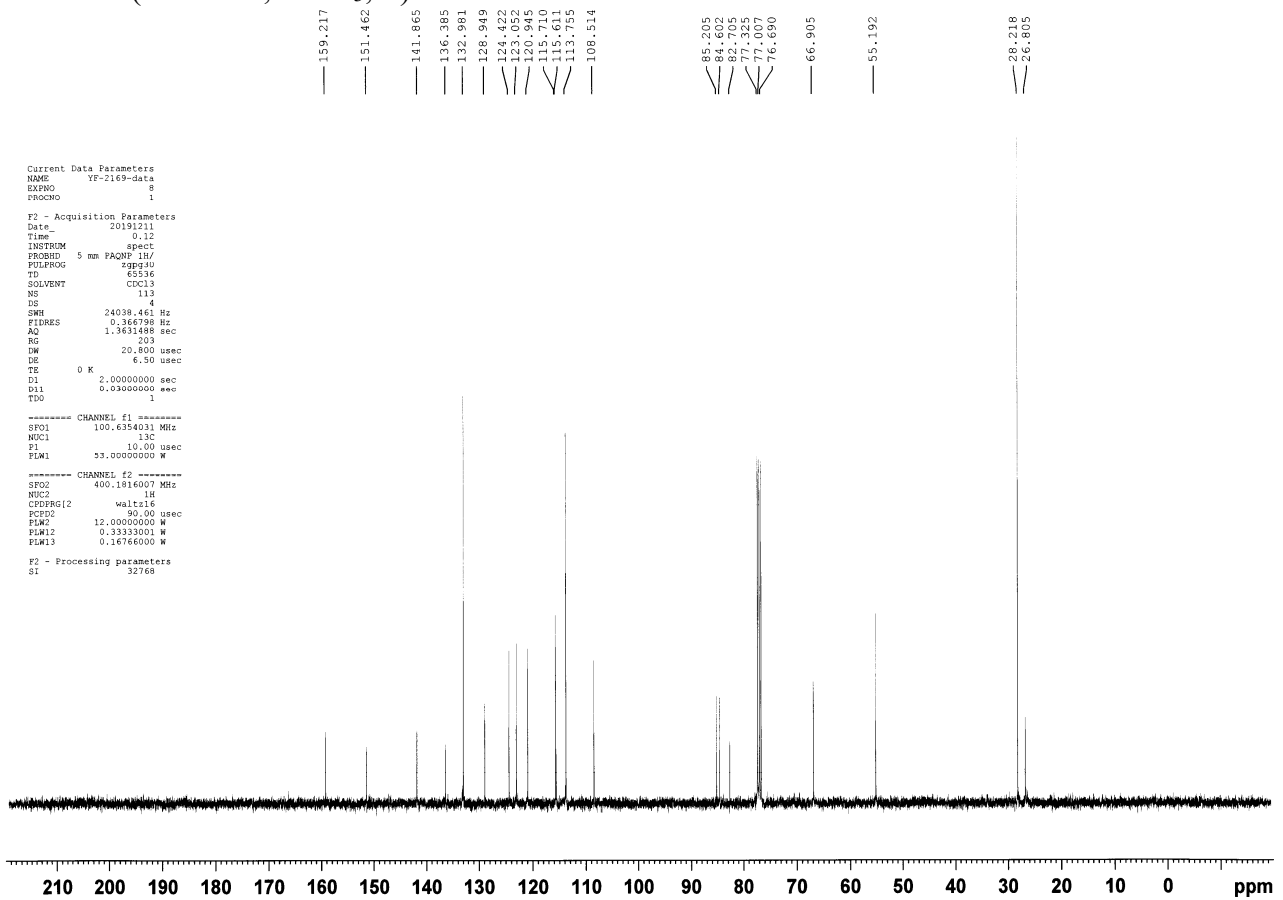

$^1\text{H}$  NMR (300 MHz,  $\text{CD}_3\text{COCD}_3$ , 25 °C)

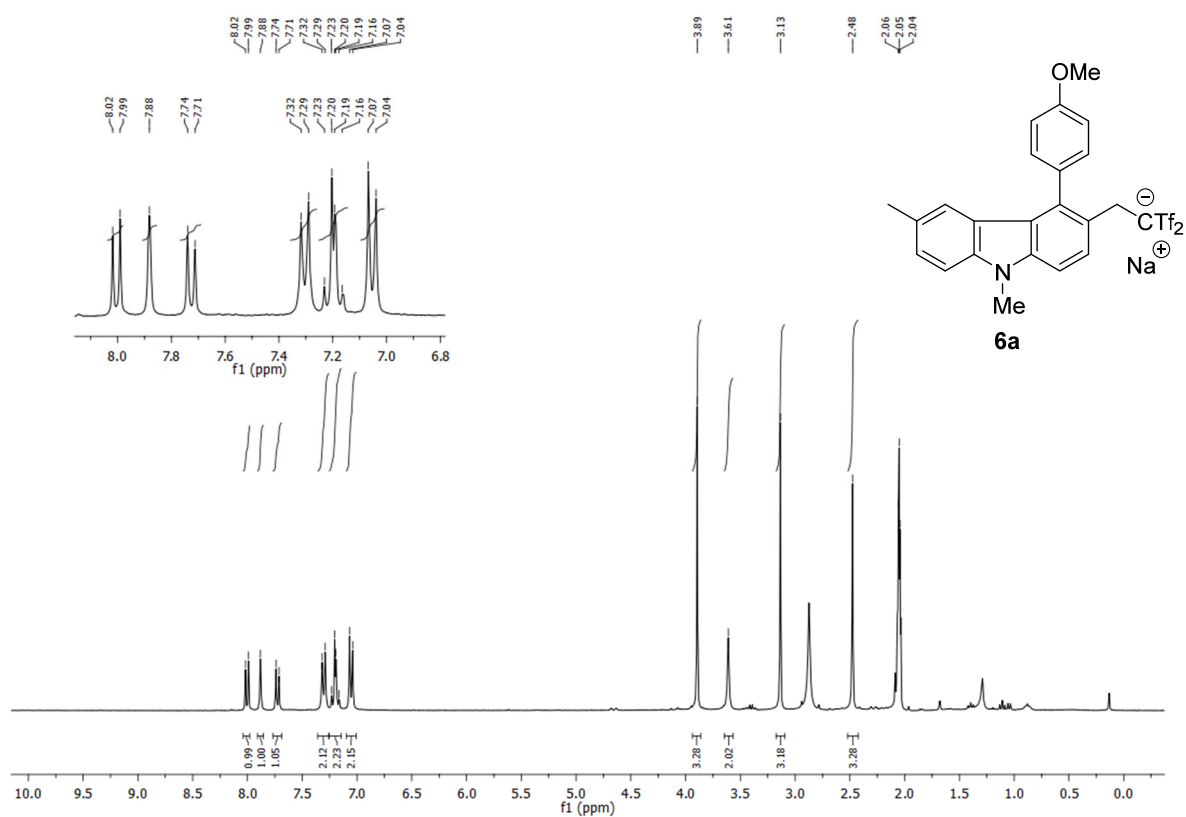

$^{13}\text{C}$  NMR (175 MHz,  $\text{CD}_3\text{COCD}_3$ , 25 °C)

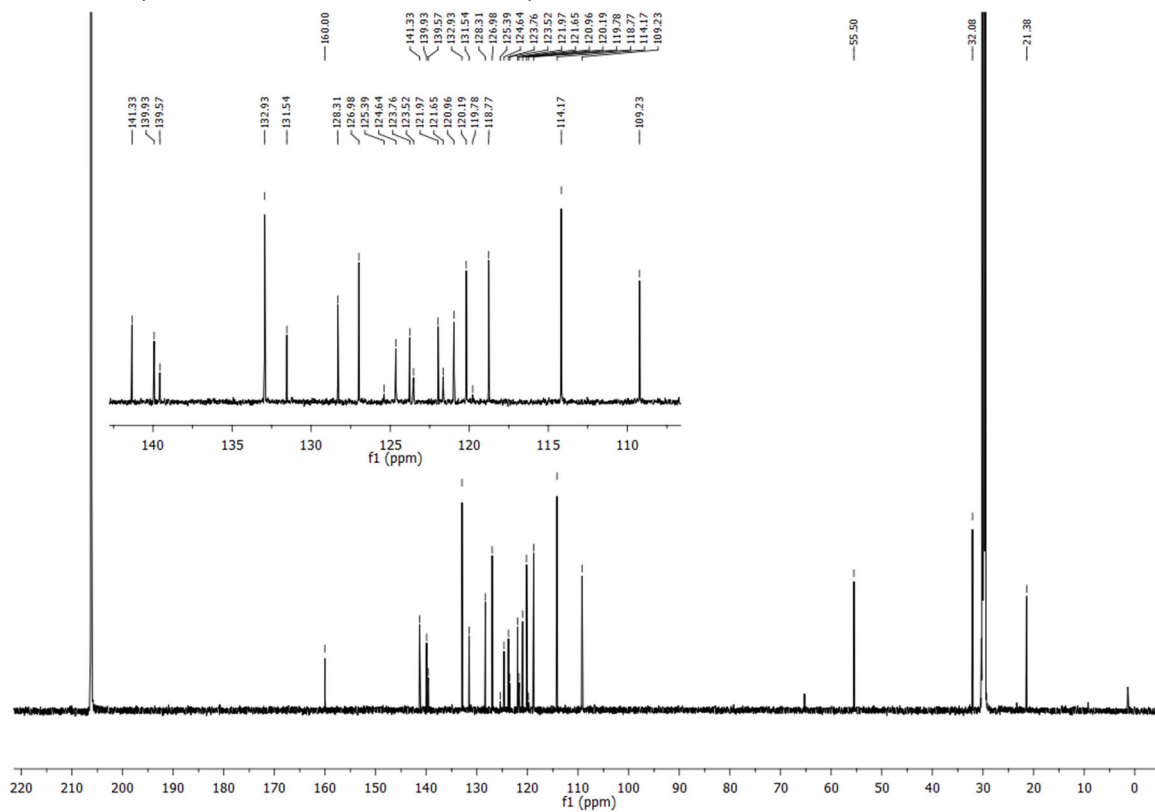

$^{19}\text{F}$  NMR (282 MHz,  $\text{CD}_3\text{COCD}_3$ , 25 °C)

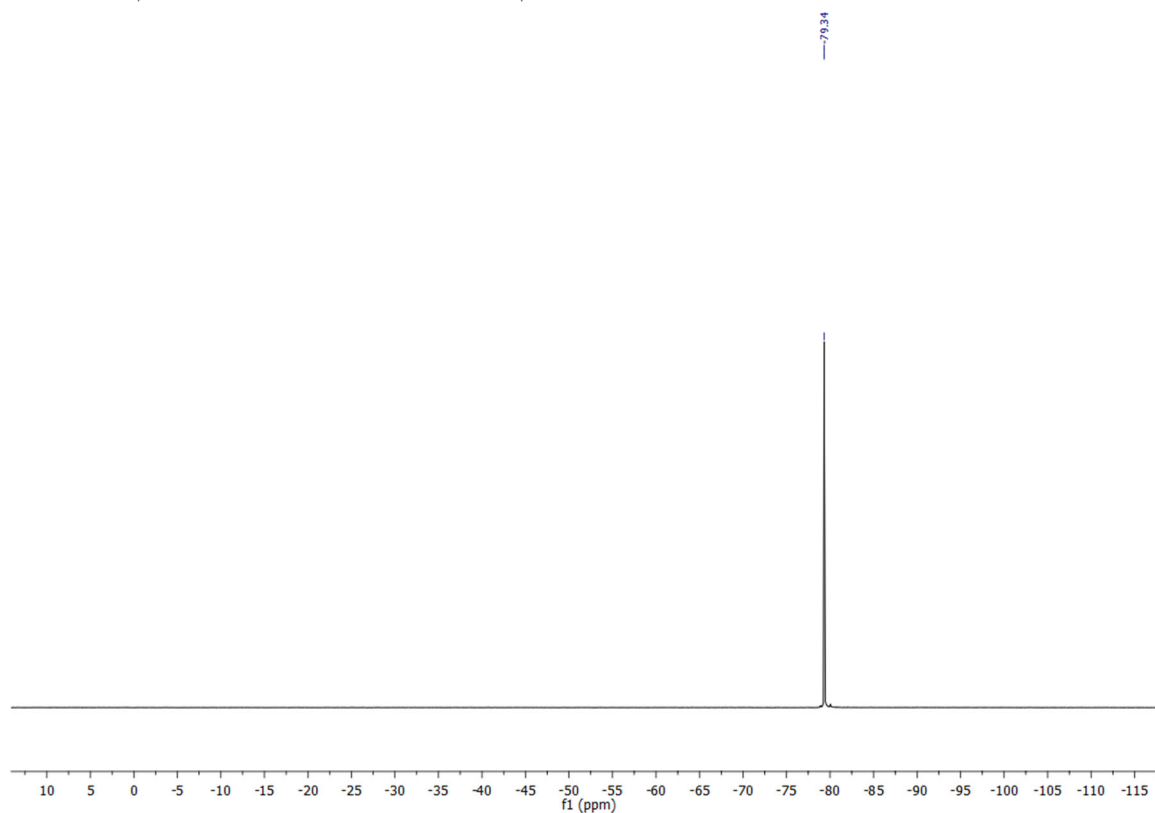

$^{23}\text{Na}$  NMR (132 MHz,  $\text{CD}_3\text{COCD}_3$ , 25 °C)

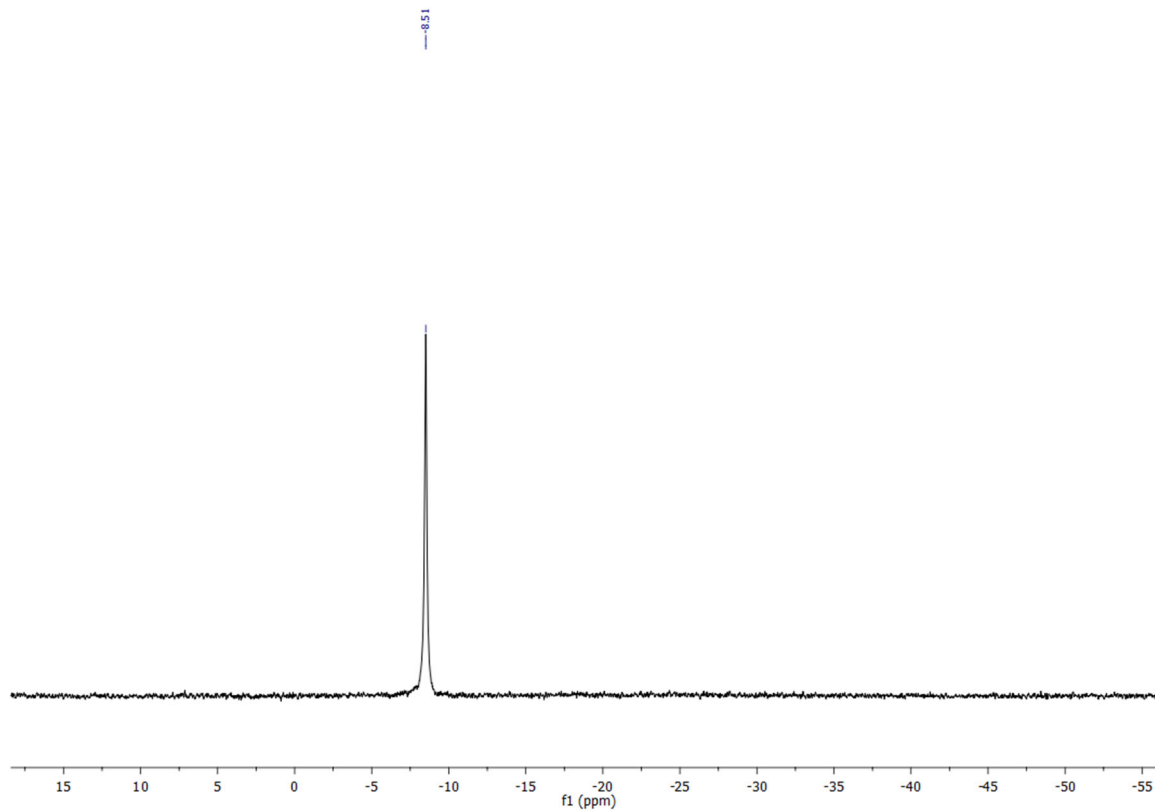

$^1\text{H}$  NMR (300 MHz,  $\text{CD}_3\text{COCD}_3$ , 25 °C)

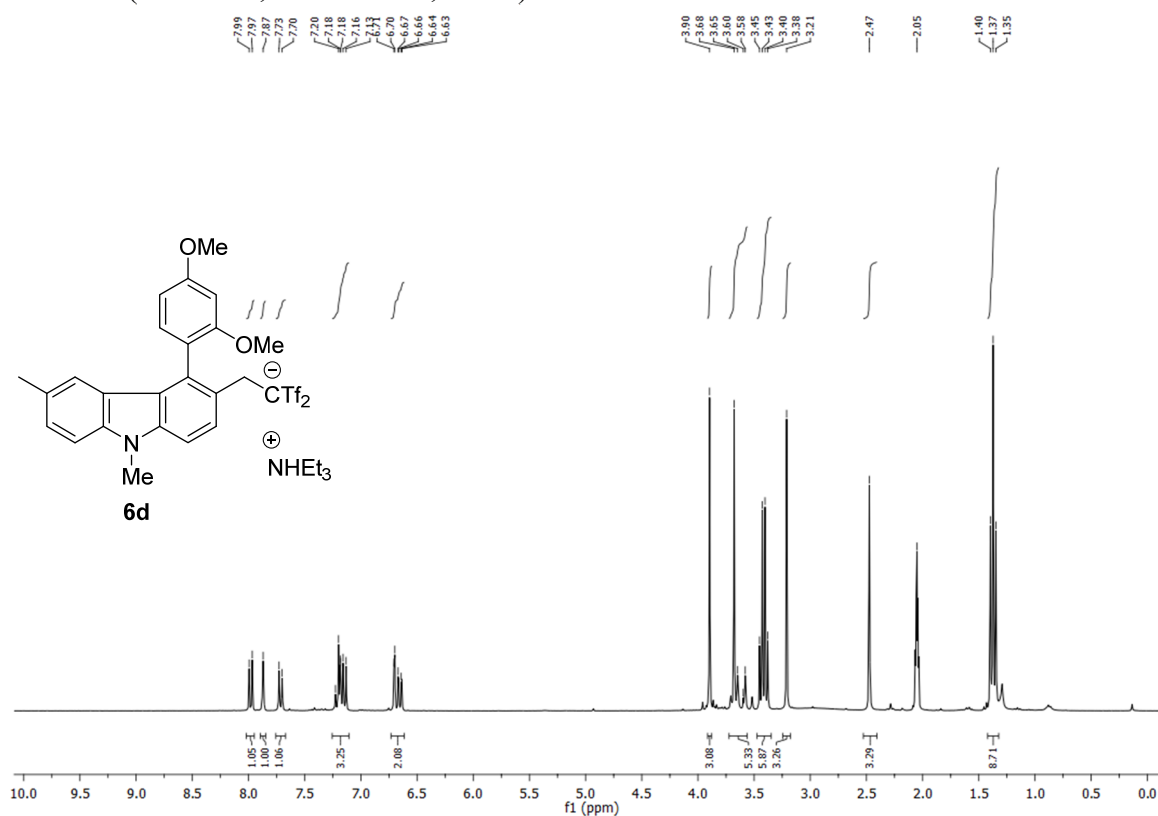

$^{13}\text{C}$  NMR (175 MHz,  $\text{CD}_3\text{COCD}_3$ , 25 °C)

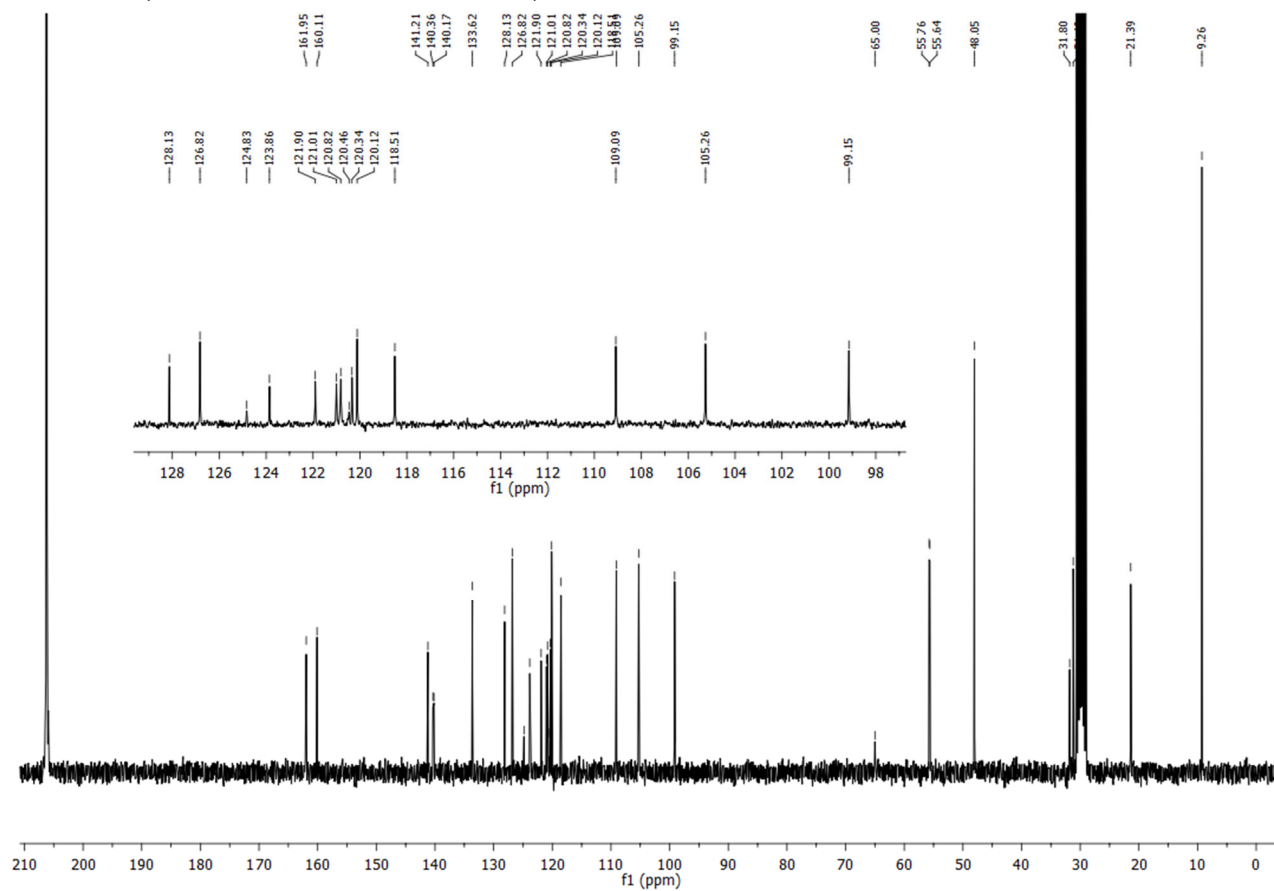

$^{19}\text{F}$  NMR (282 MHz,  $\text{CD}_3\text{COCD}_3$ , 25 °C)

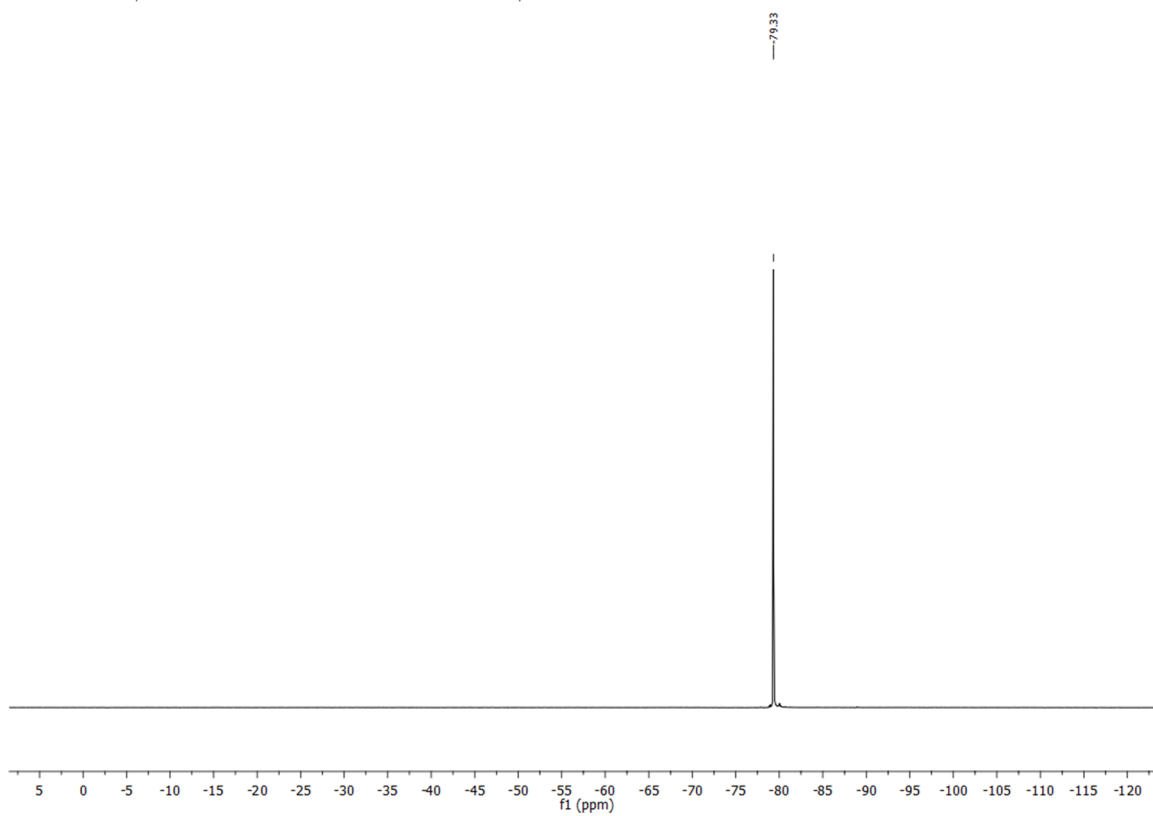

$^1\text{H}$  NMR (300 MHz,  $\text{CD}_3\text{COCD}_3$ , 25 °C)

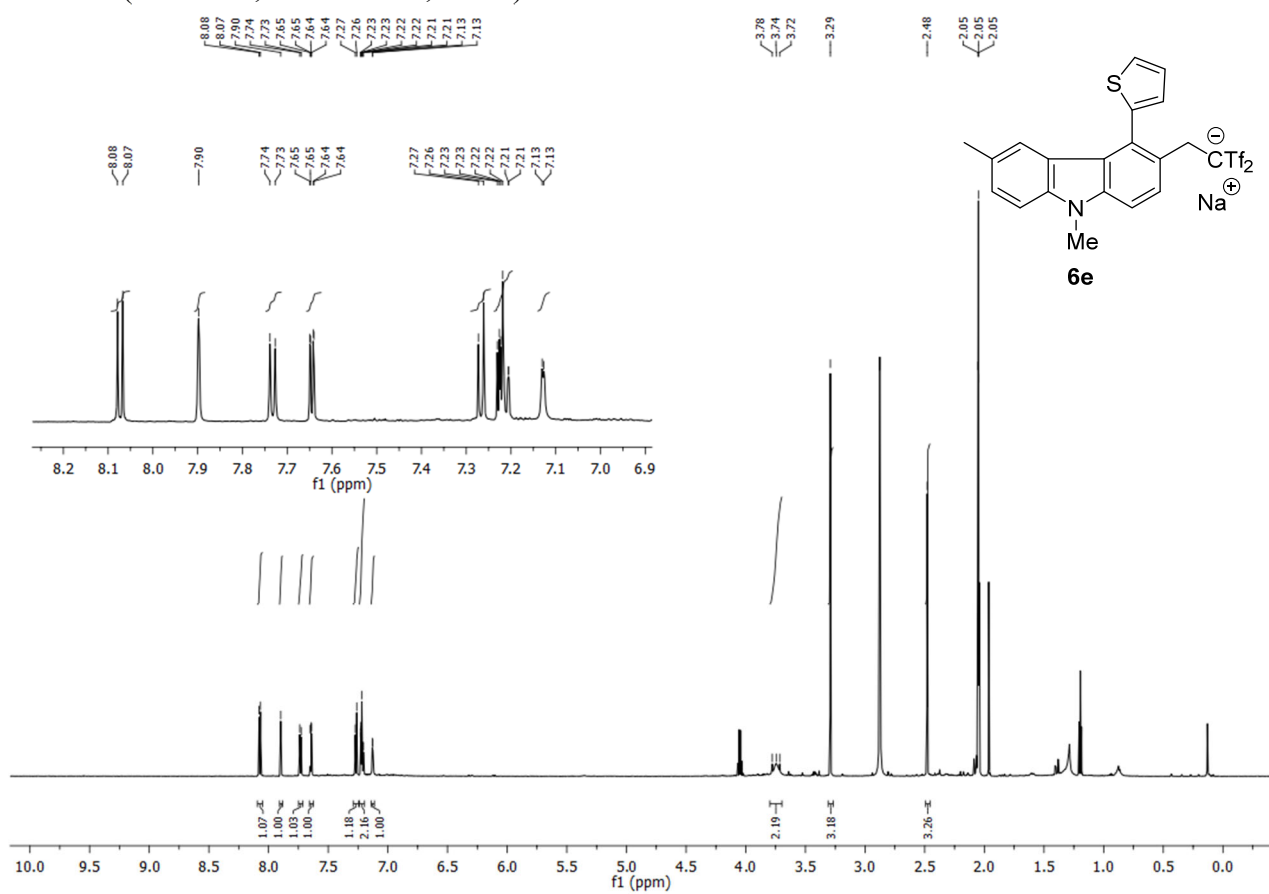

$^{13}\text{C}$  NMR (175 MHz,  $\text{CD}_3\text{COCD}_3$ , 25 °C)

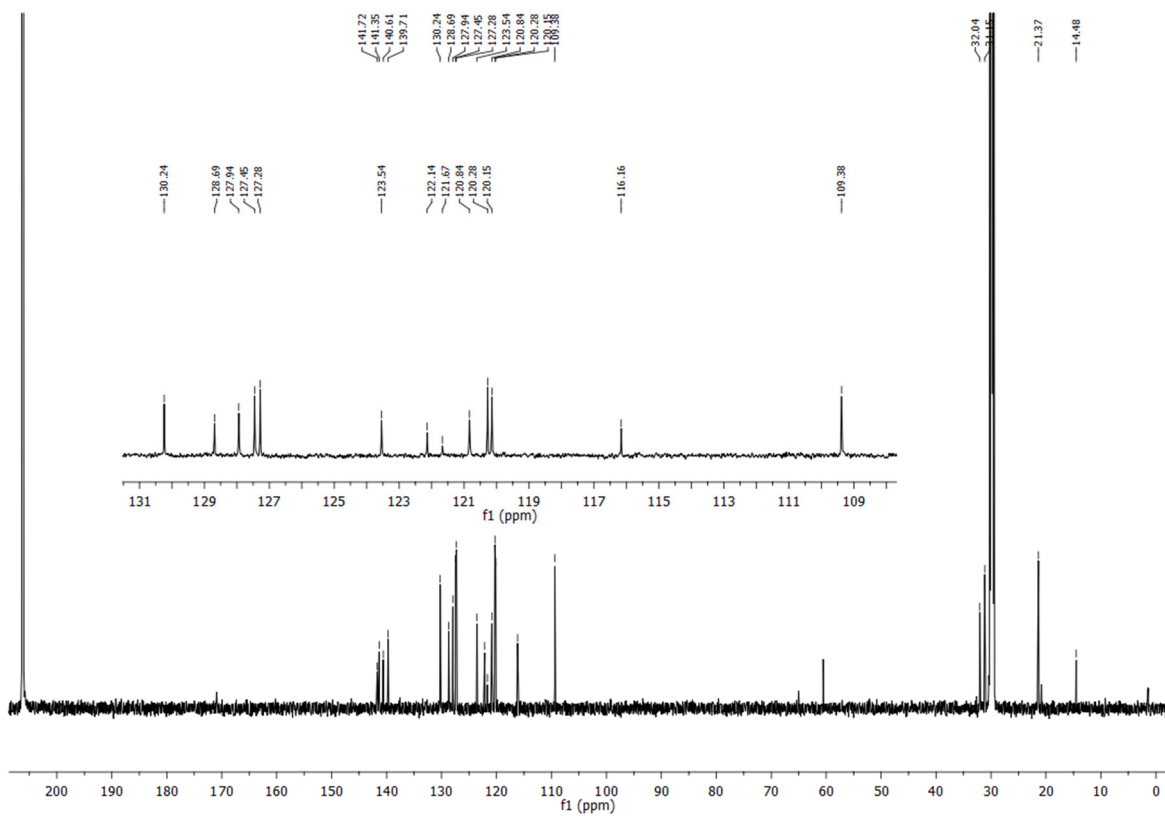

$^{19}\text{F}$  NMR (282 MHz,  $\text{CD}_3\text{COCD}_3$ , 25 °C)

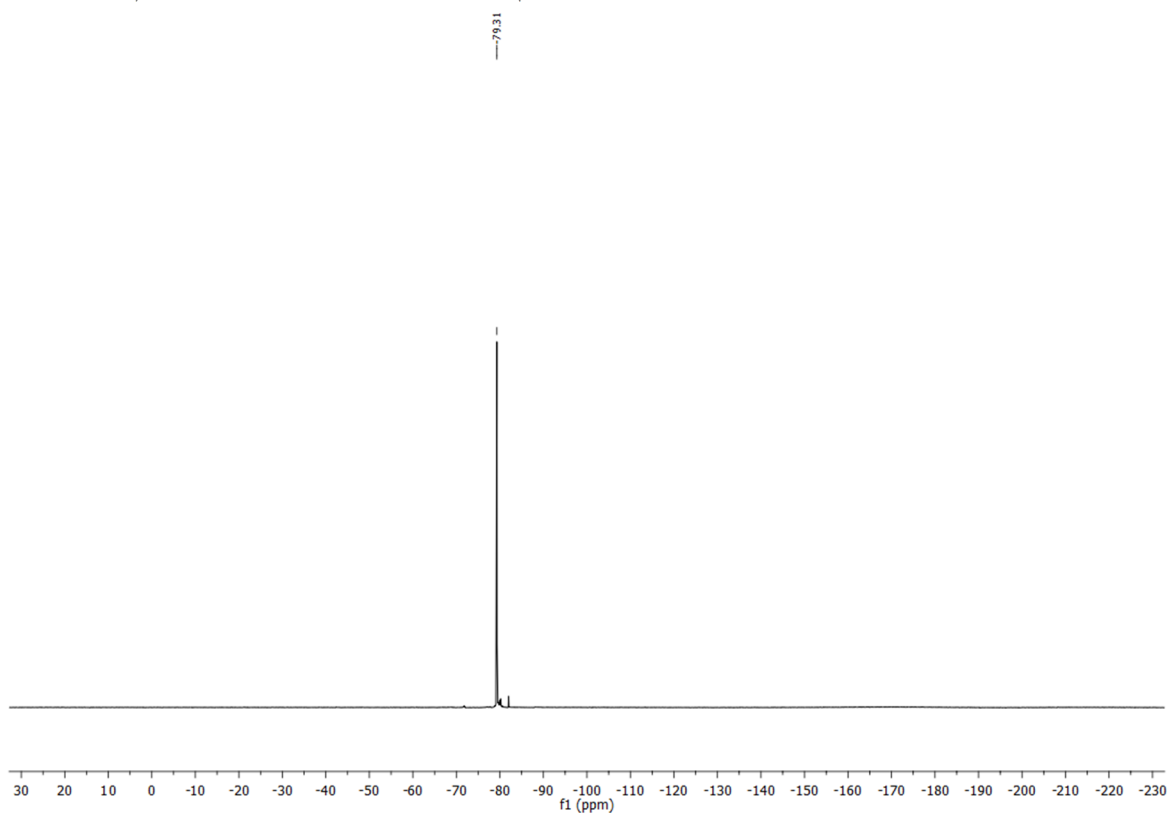

$^{23}\text{Na}$  NMR (132 MHz,  $\text{CD}_3\text{COCD}_3$ , 25 °C)

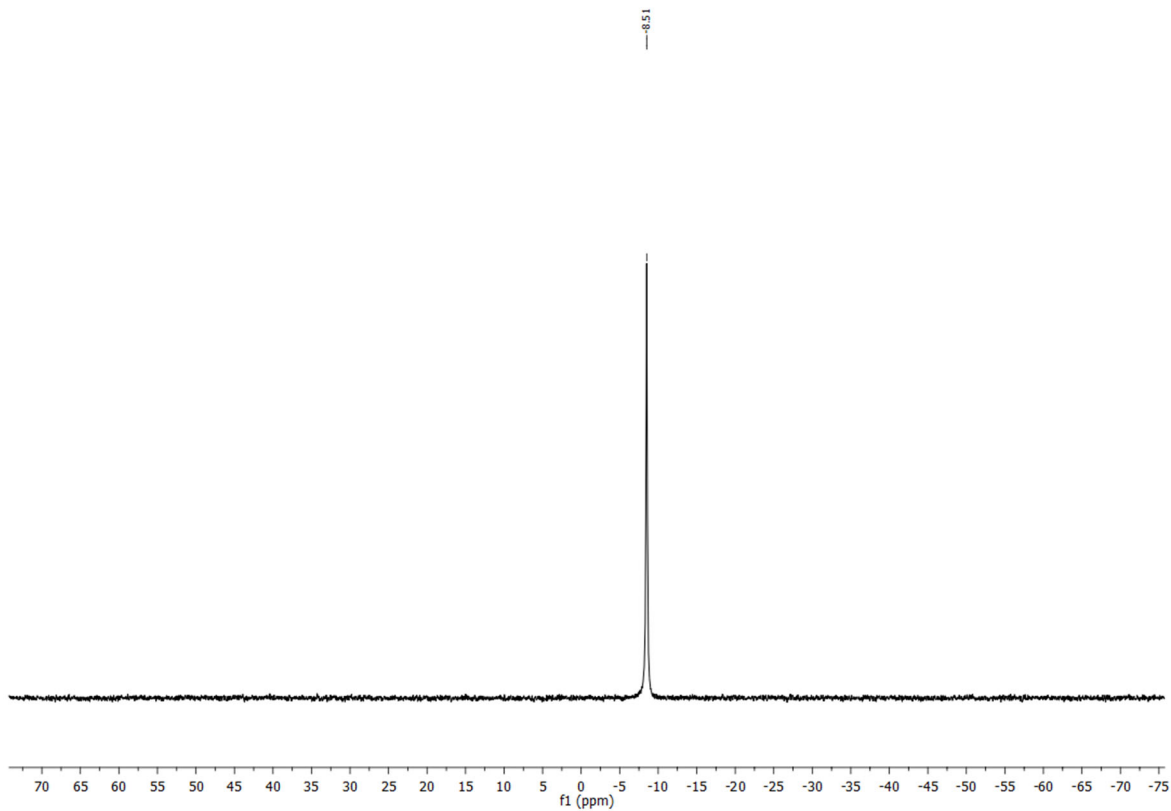



$^1\text{H}$  NMR (300 MHz,  $\text{CD}_3\text{COCD}_3$ , 25 °C)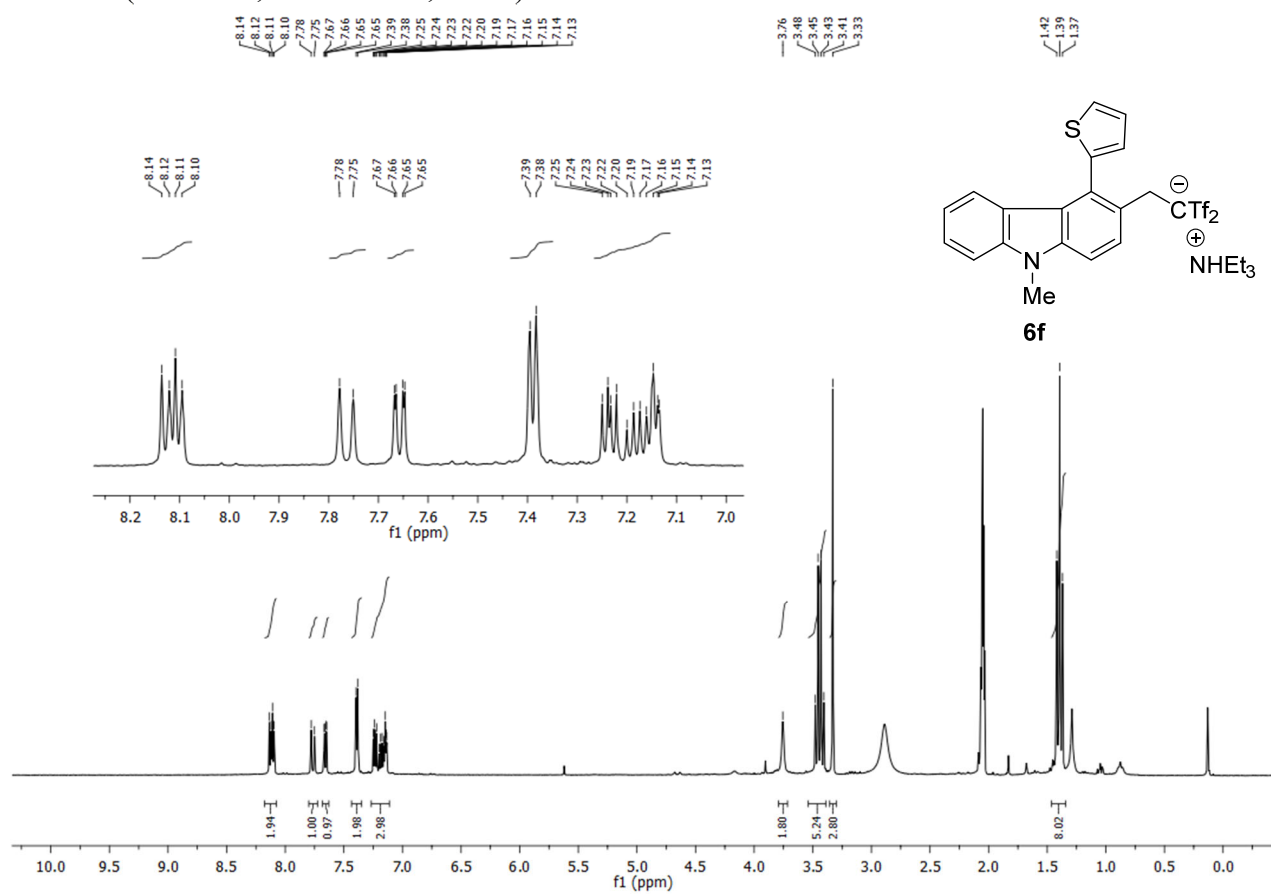 $^{13}\text{C}$  NMR (175 MHz,  $\text{CD}_3\text{COCD}_3$ , 25 °C)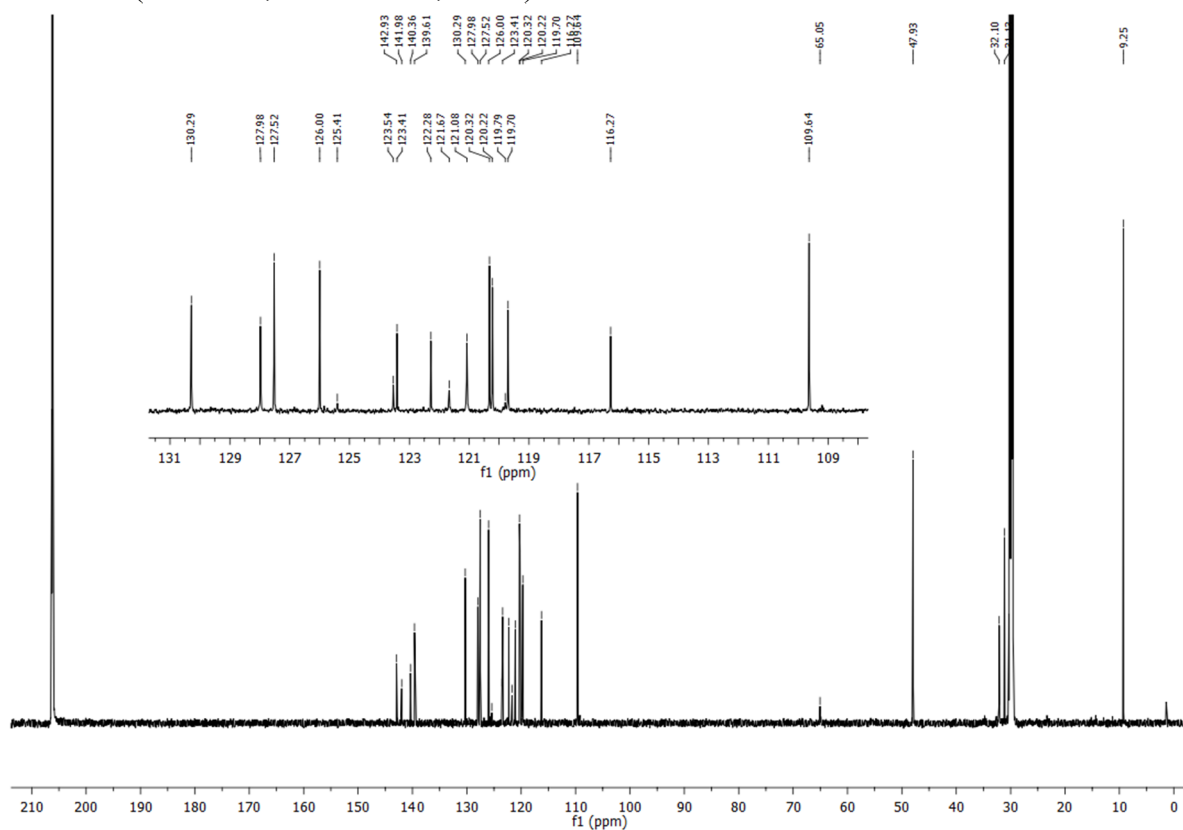

$^{19}\text{F}$  NMR (282 MHz,  $\text{CD}_3\text{COCD}_3$ , 25 °C)

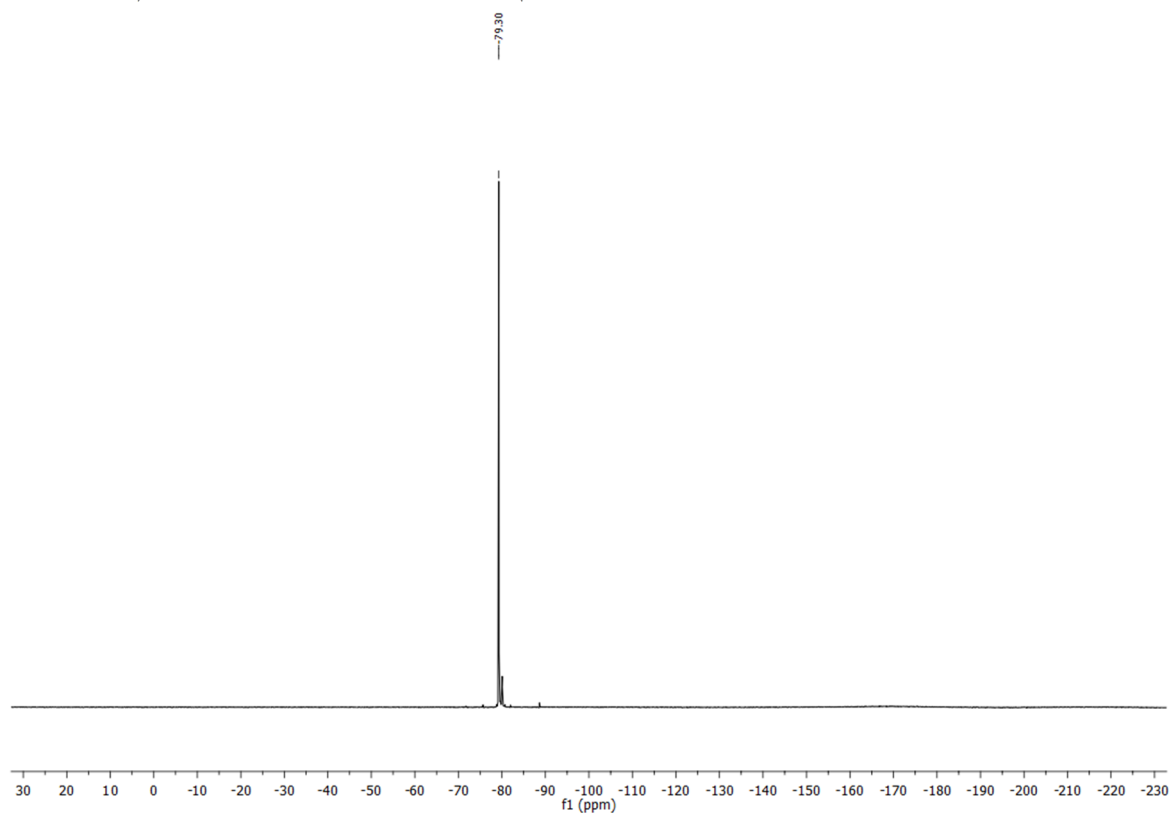

$^{23}\text{Na}$  NMR (132 MHz,  $\text{CD}_3\text{COCD}_3$ , 25 °C)

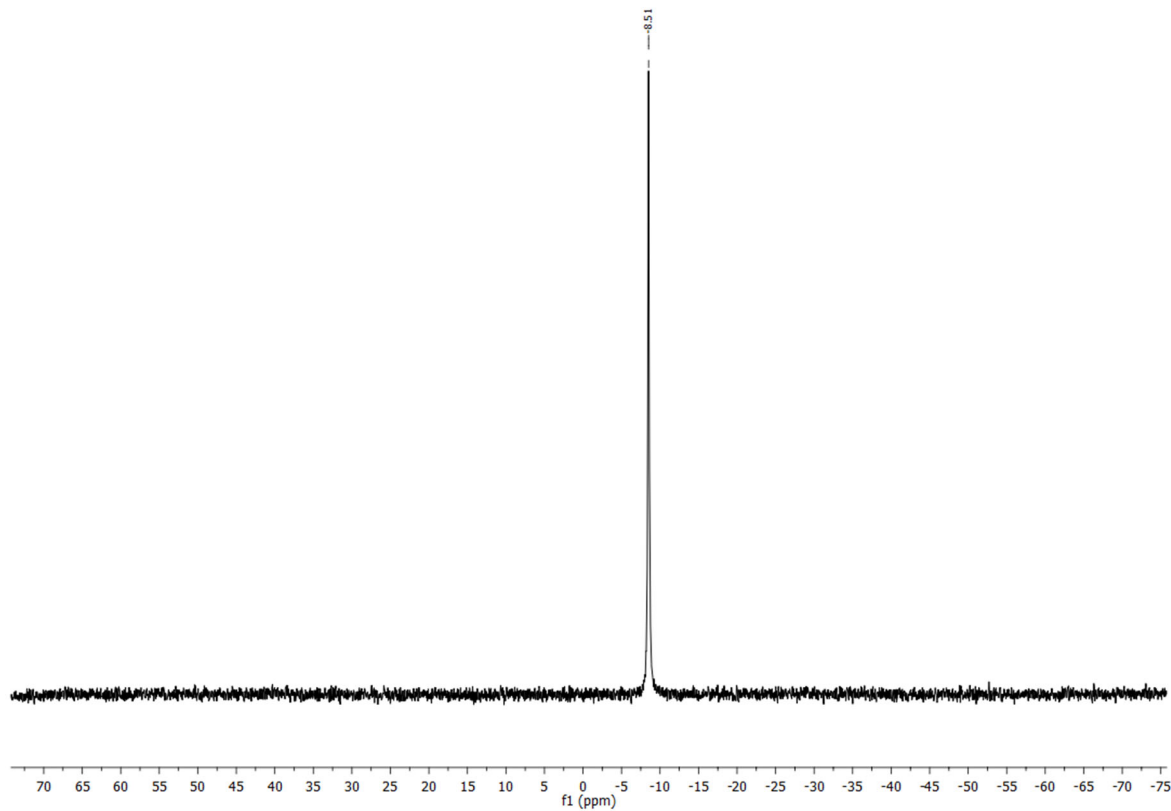

$^1\text{H}$  NMR (300 MHz,  $\text{CD}_3\text{COCD}_3$ , 25 °C)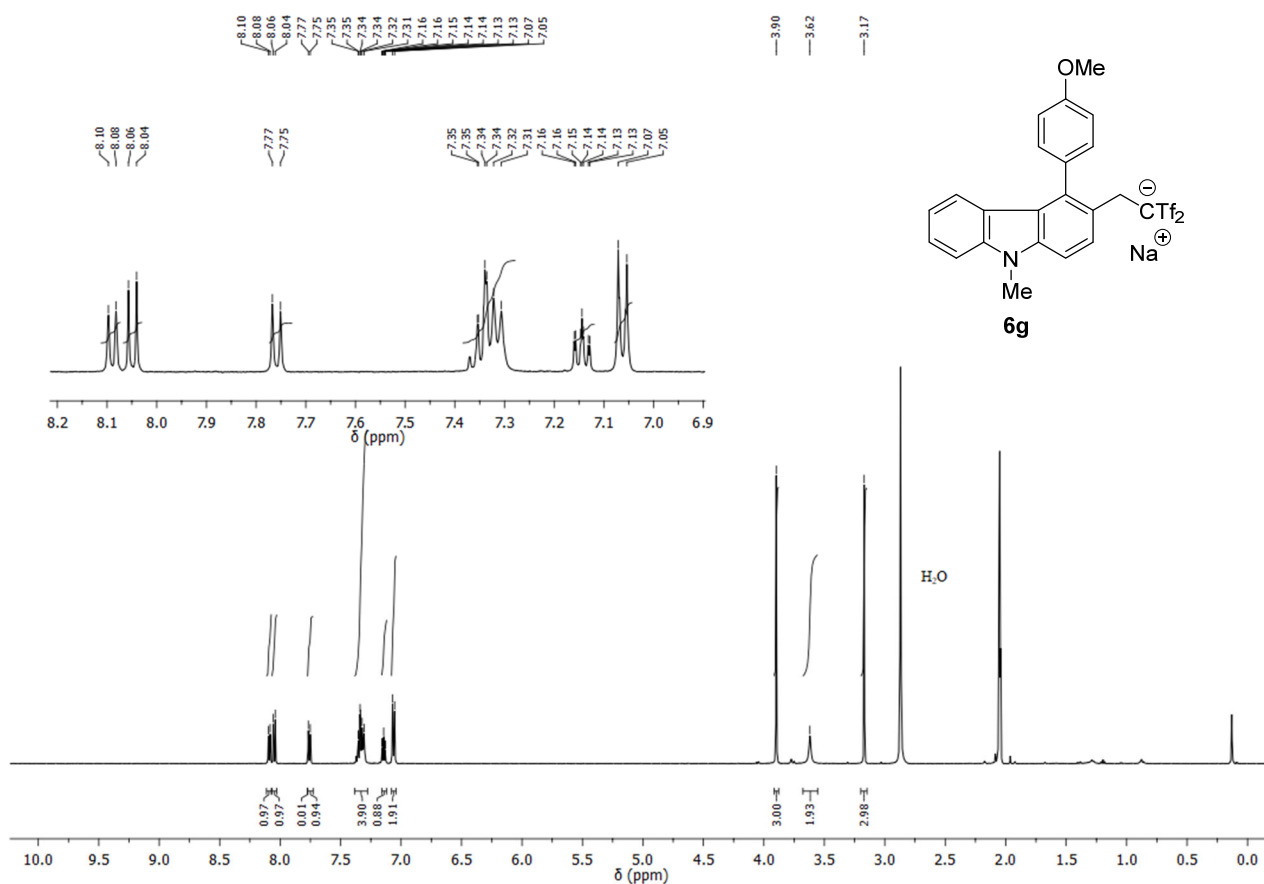 $^{13}\text{C}$  NMR (175 MHz,  $\text{CD}_3\text{COCD}_3$ , 25 °C)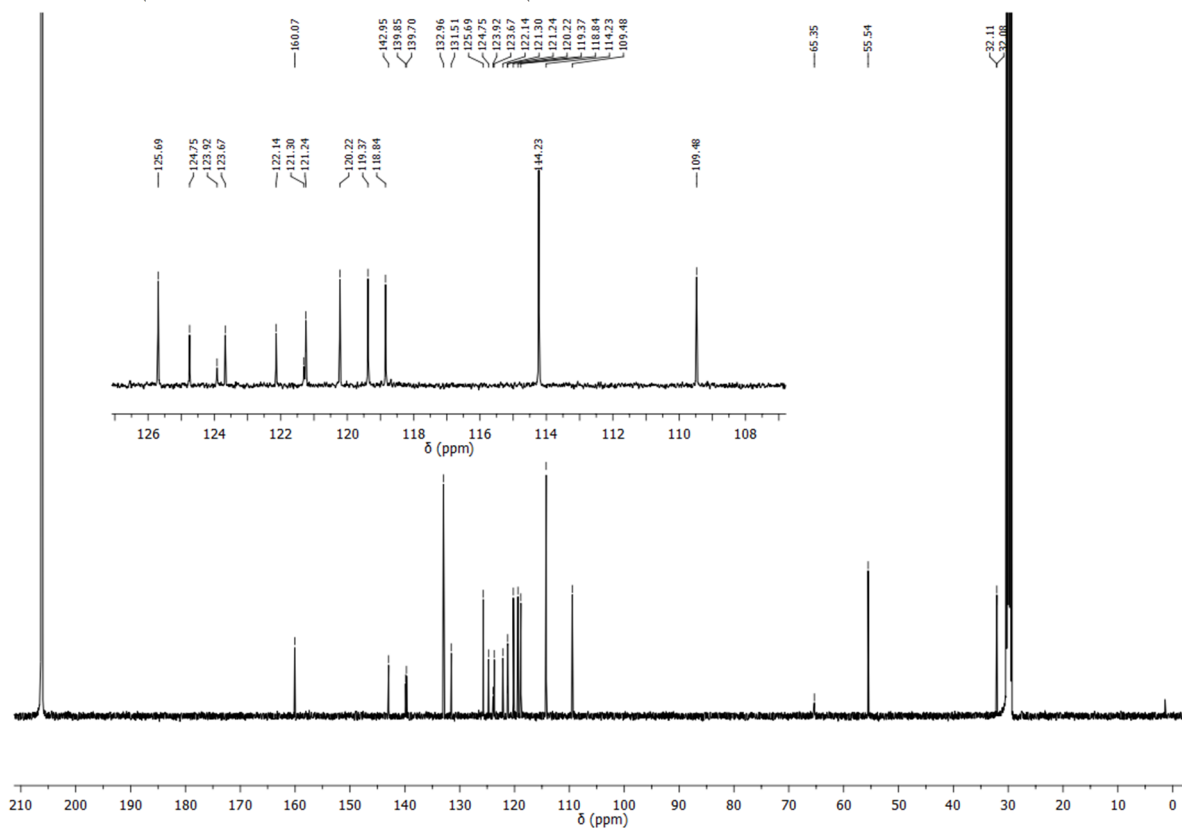

$^{19}\text{F}$  NMR (282 MHz,  $\text{CD}_3\text{COCD}_3$ , 25 °C)

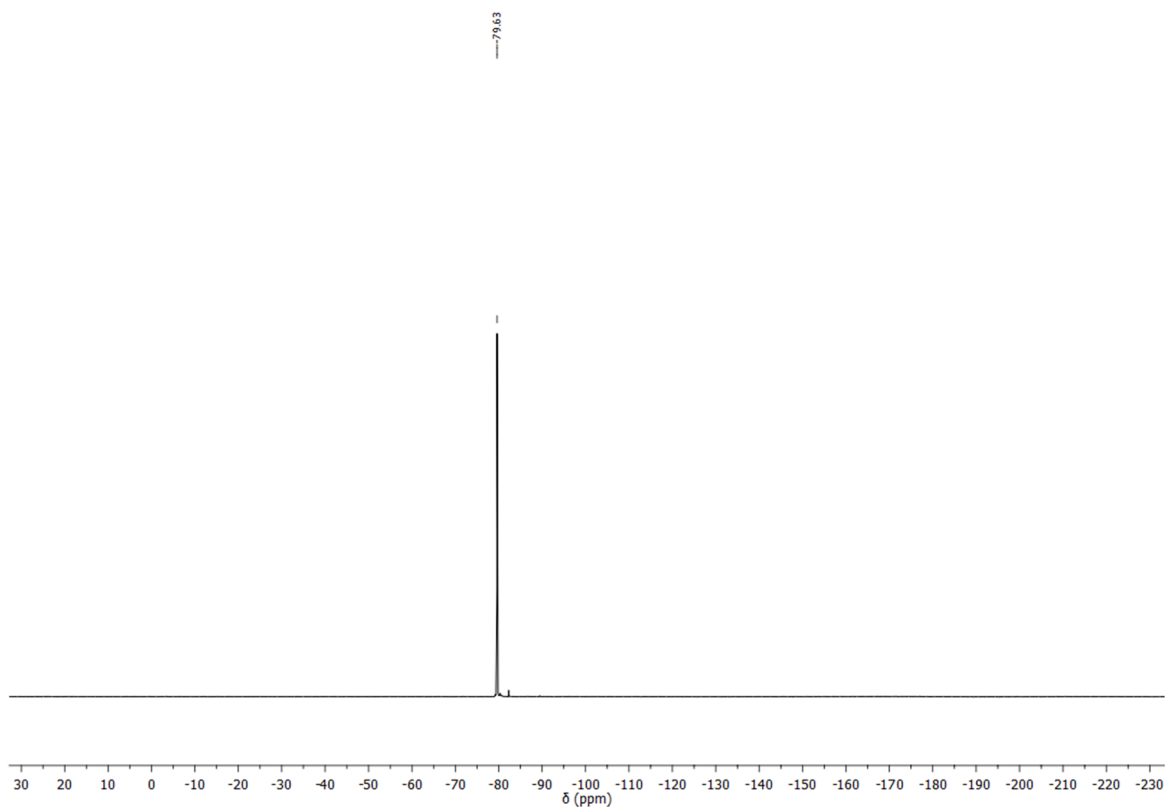

$^{23}\text{Na}$  NMR (132 MHz,  $\text{CD}_3\text{COCD}_3$ , 25 °C)

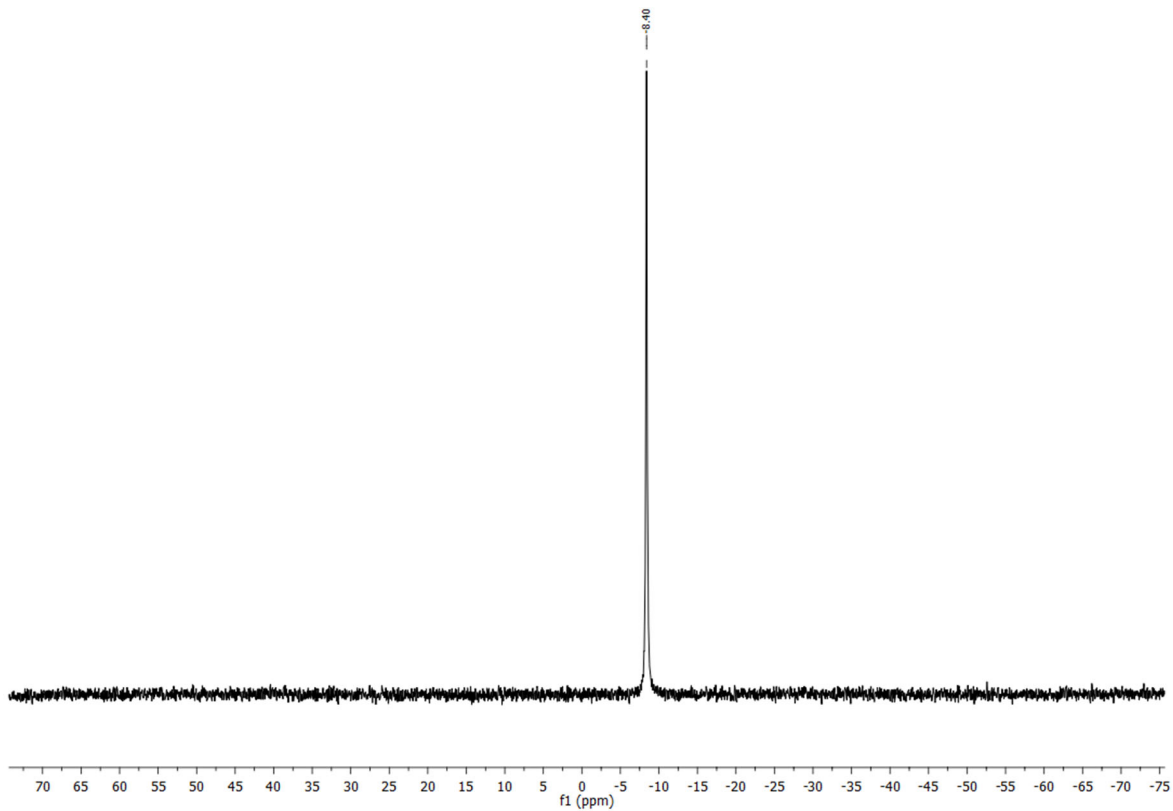

$^1\text{H}$  NMR (300 MHz,  $\text{CD}_3\text{COCD}_3$ , 25 °C)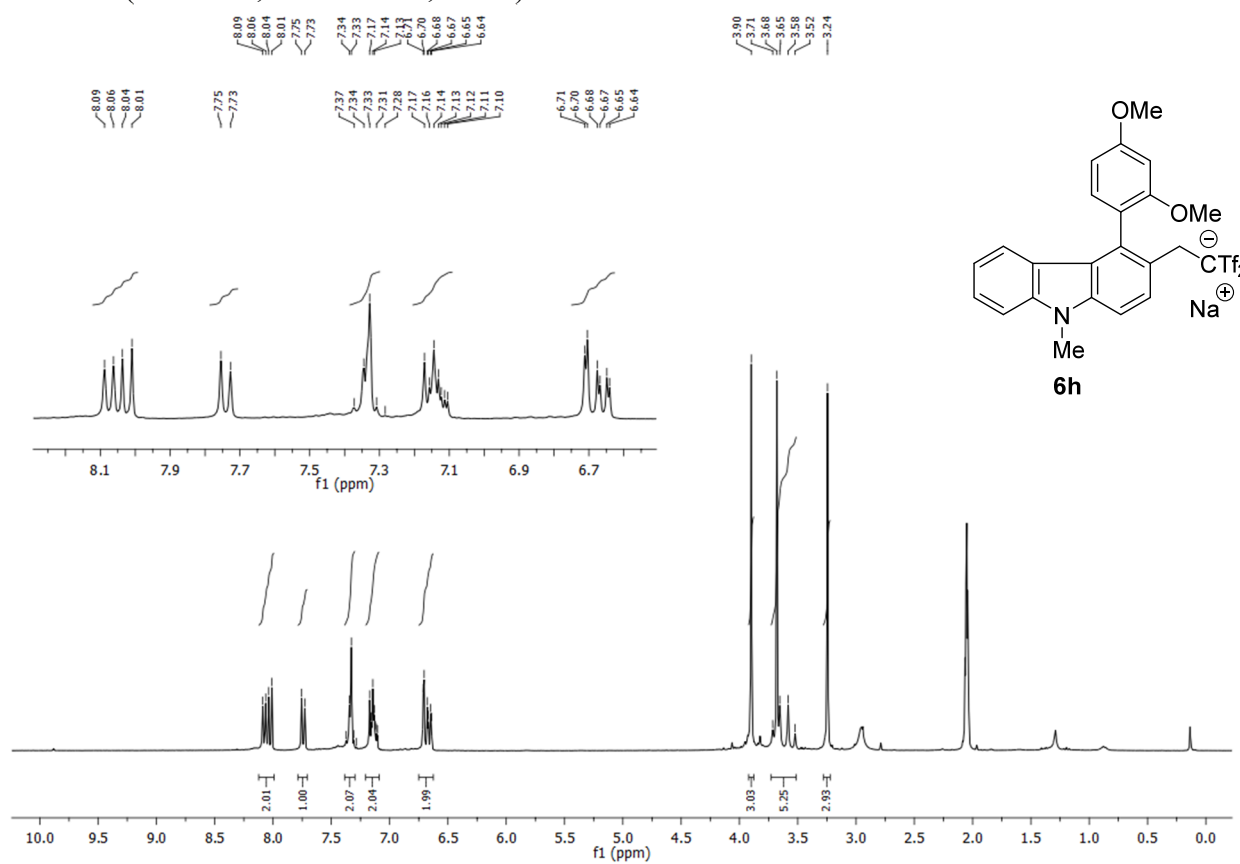 $^{13}\text{C}$  NMR (175 MHz,  $\text{CD}_3\text{COCD}_3$ , 25 °C)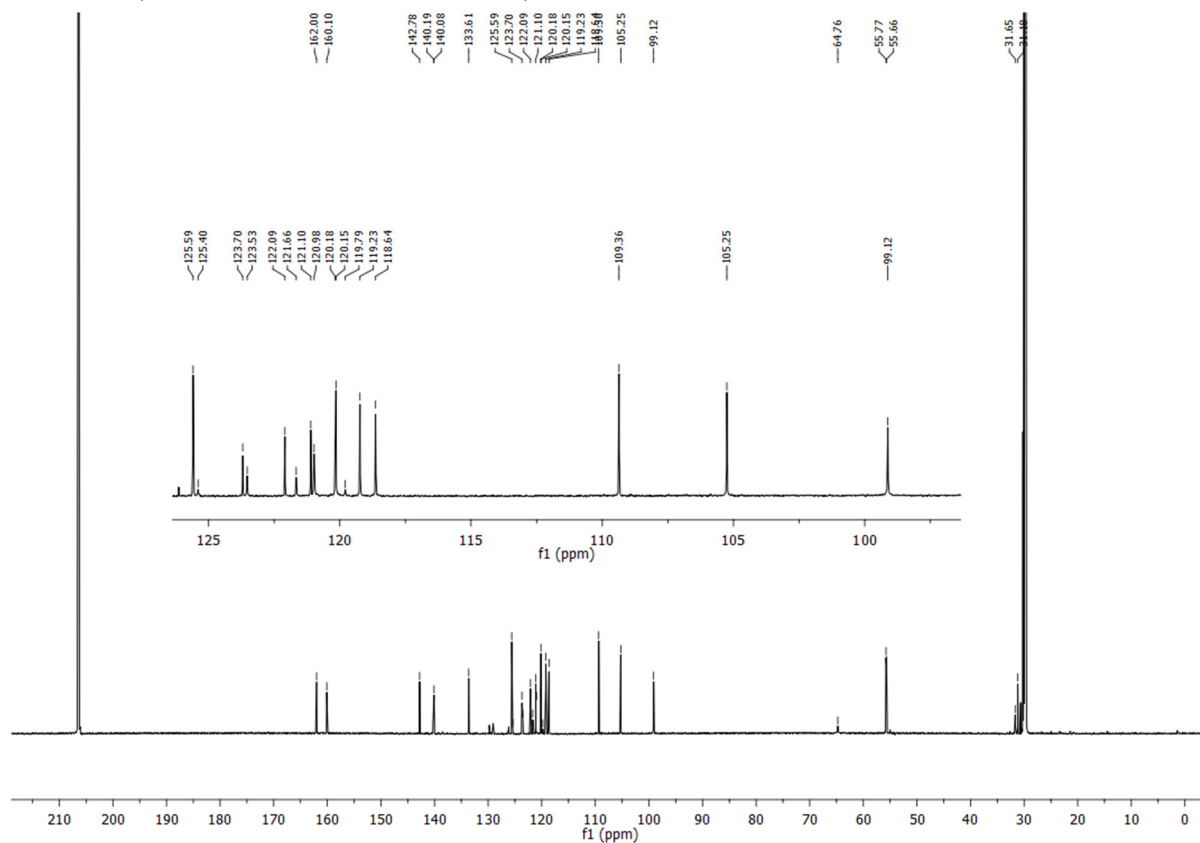

$^{19}\text{F}$  NMR (282 MHz,  $\text{CD}_3\text{COCD}_3$ , 25 °C)

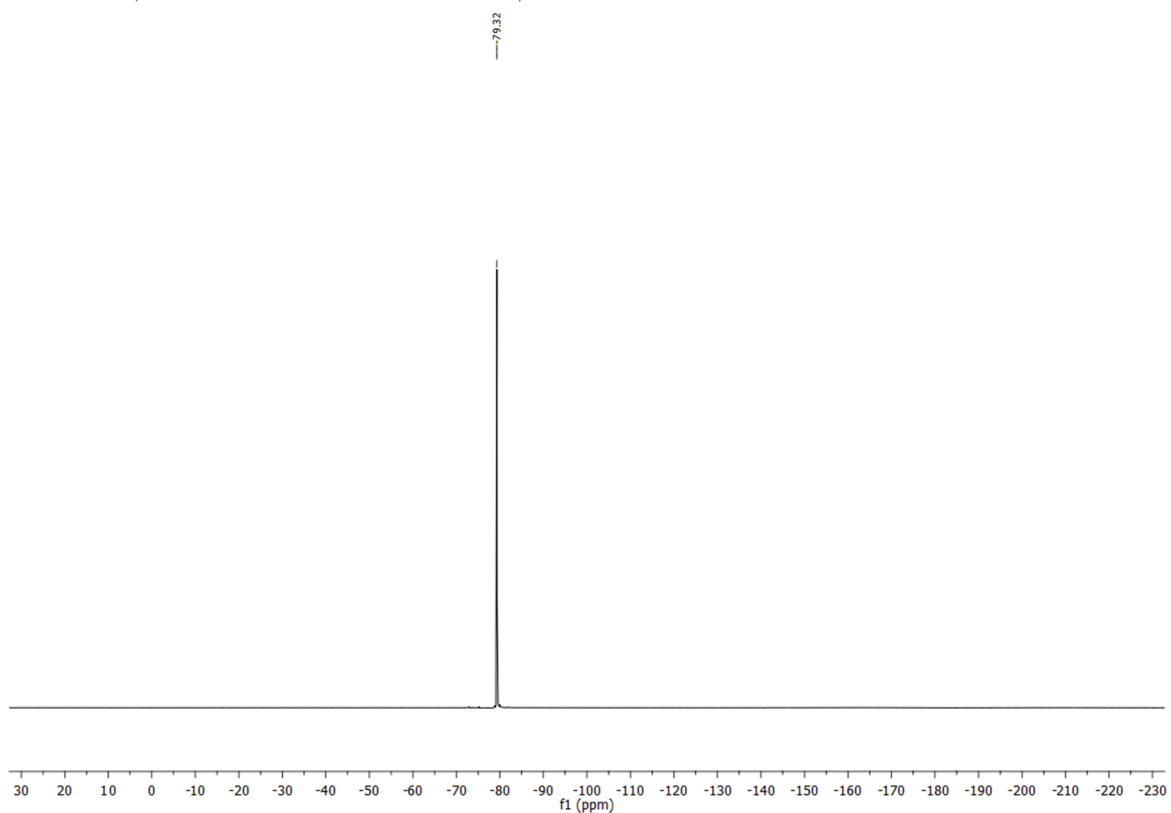

$^{23}\text{Na}$  NMR (132 MHz,  $\text{CD}_3\text{COCD}_3$ , 25 °C)

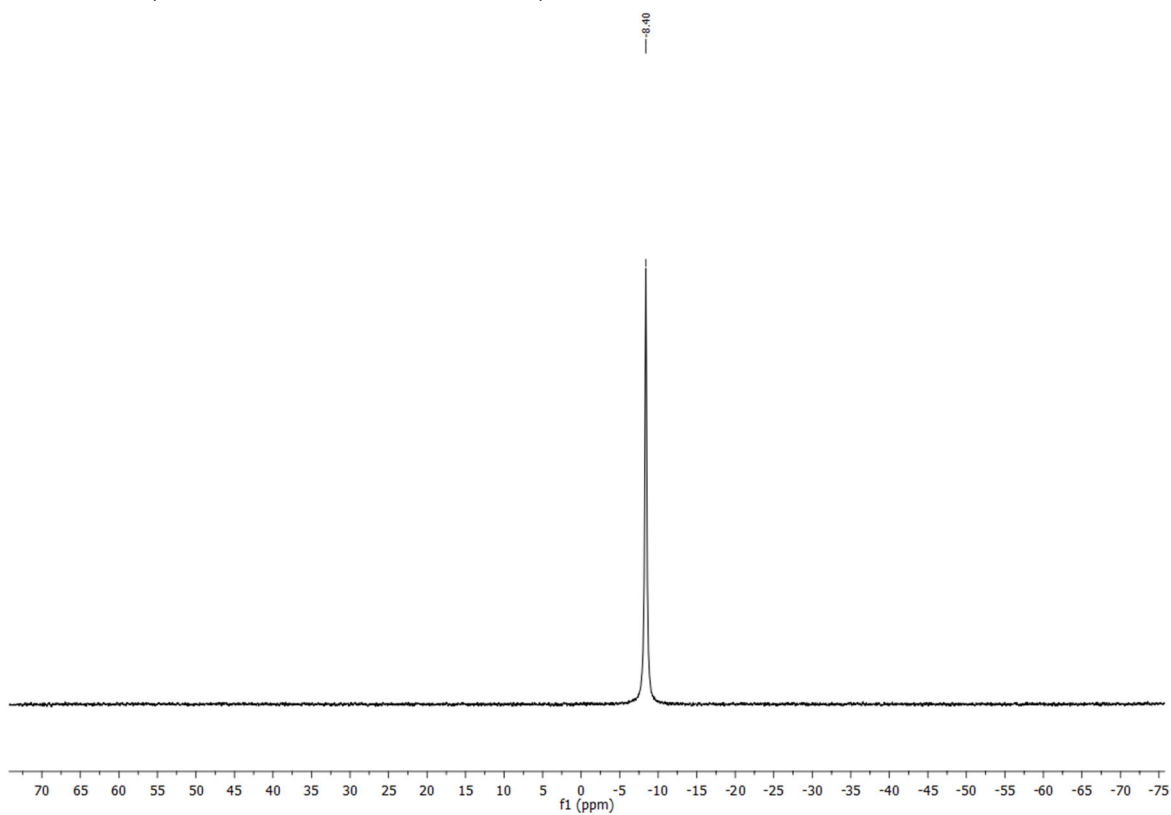

$^1\text{H}$  NMR (300 MHz,  $\text{CD}_3\text{COCD}_3$ , 25 °C)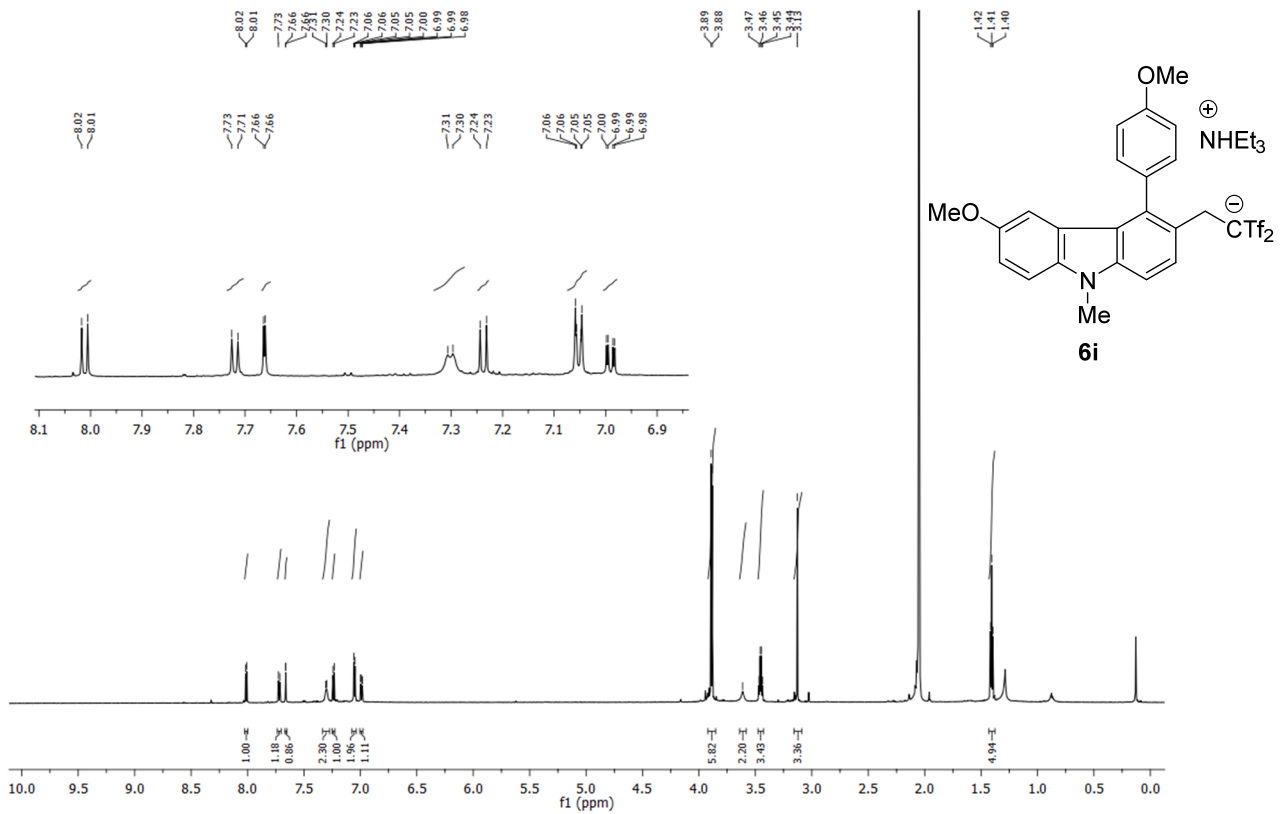 $^{13}\text{C}$  NMR (175 MHz,  $\text{CD}_3\text{COCD}_3$ , 25 °C)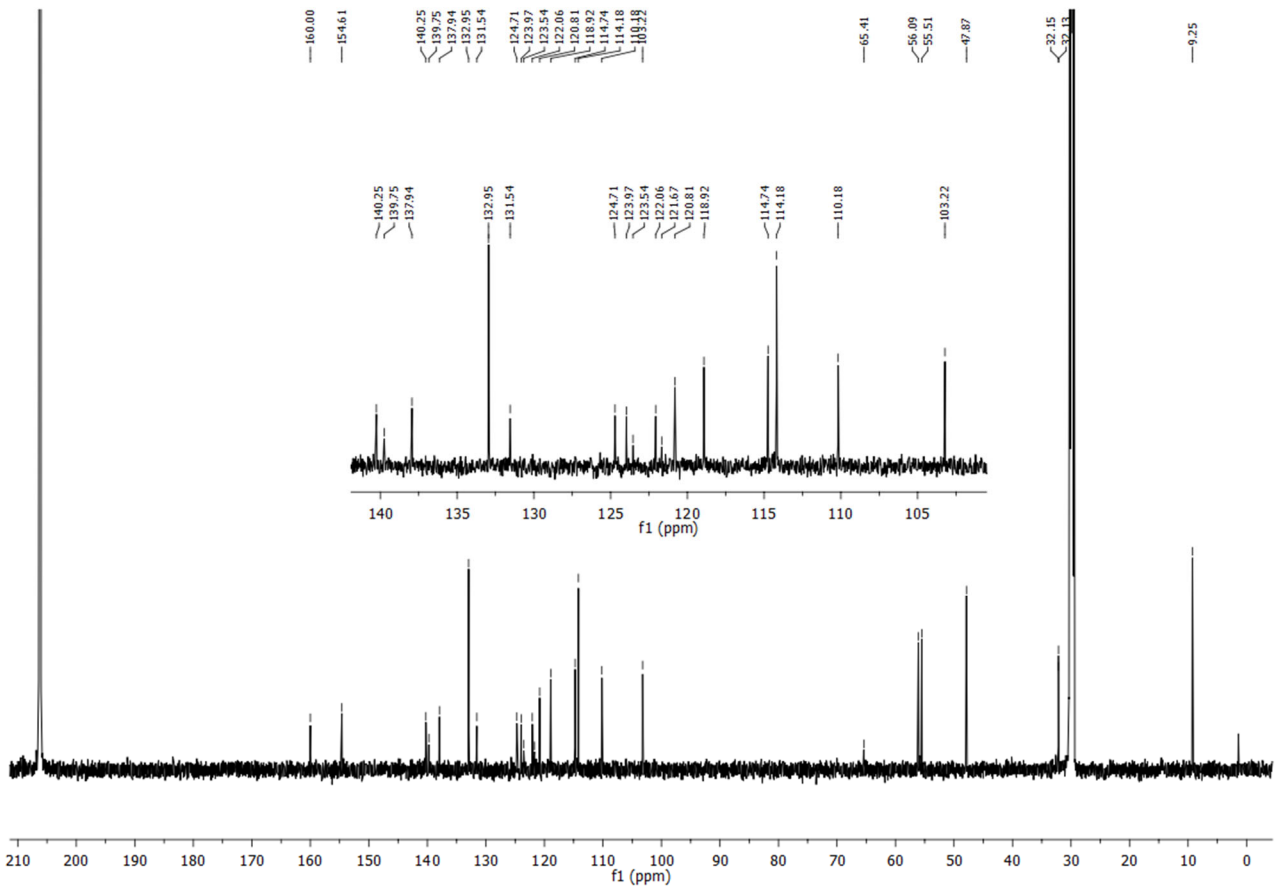

$^{19}\text{F}$  NMR (282 MHz,  $\text{CD}_3\text{COCD}_3$ , 25 °C)

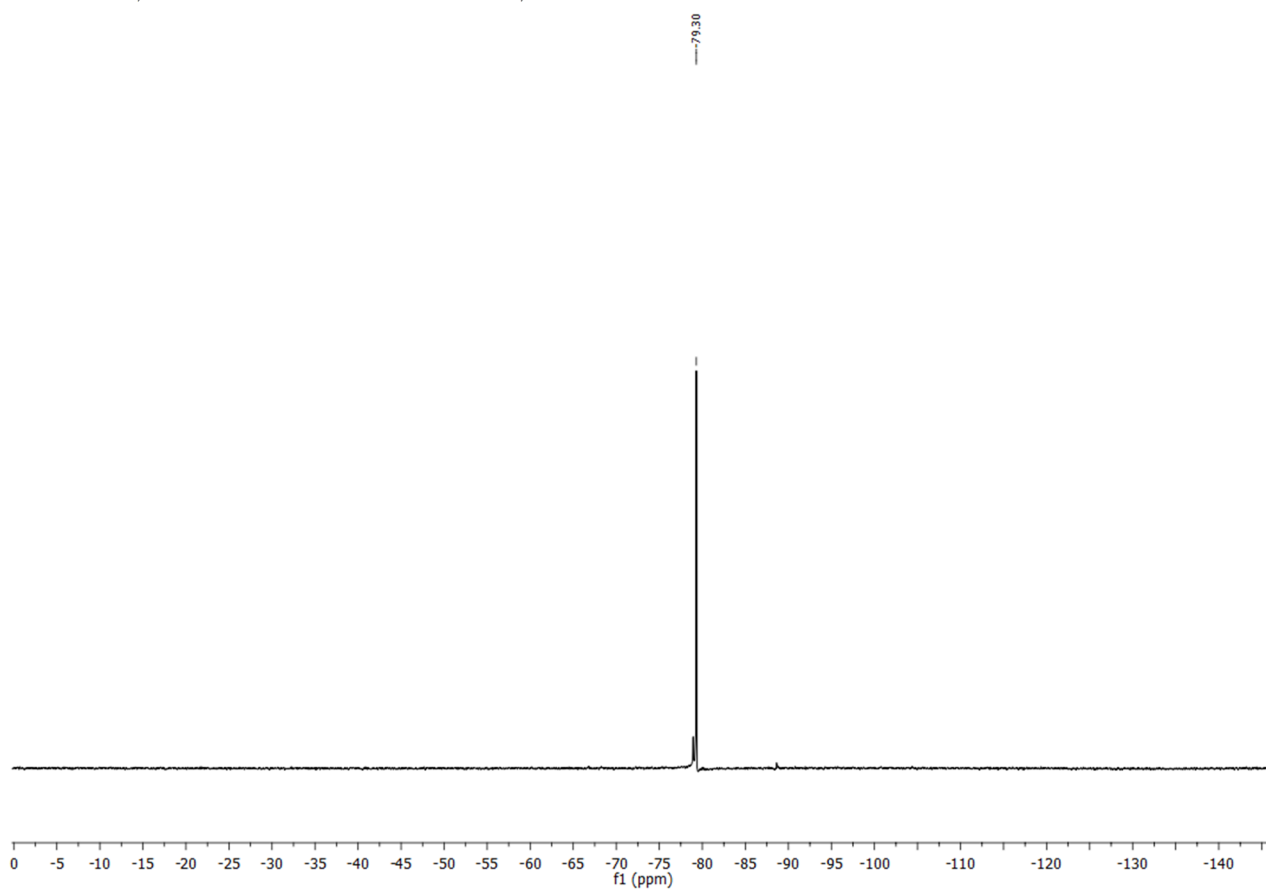

$^{23}\text{Na}$  NMR (132 MHz,  $\text{CD}_3\text{COCD}_3$ , 25 °C)

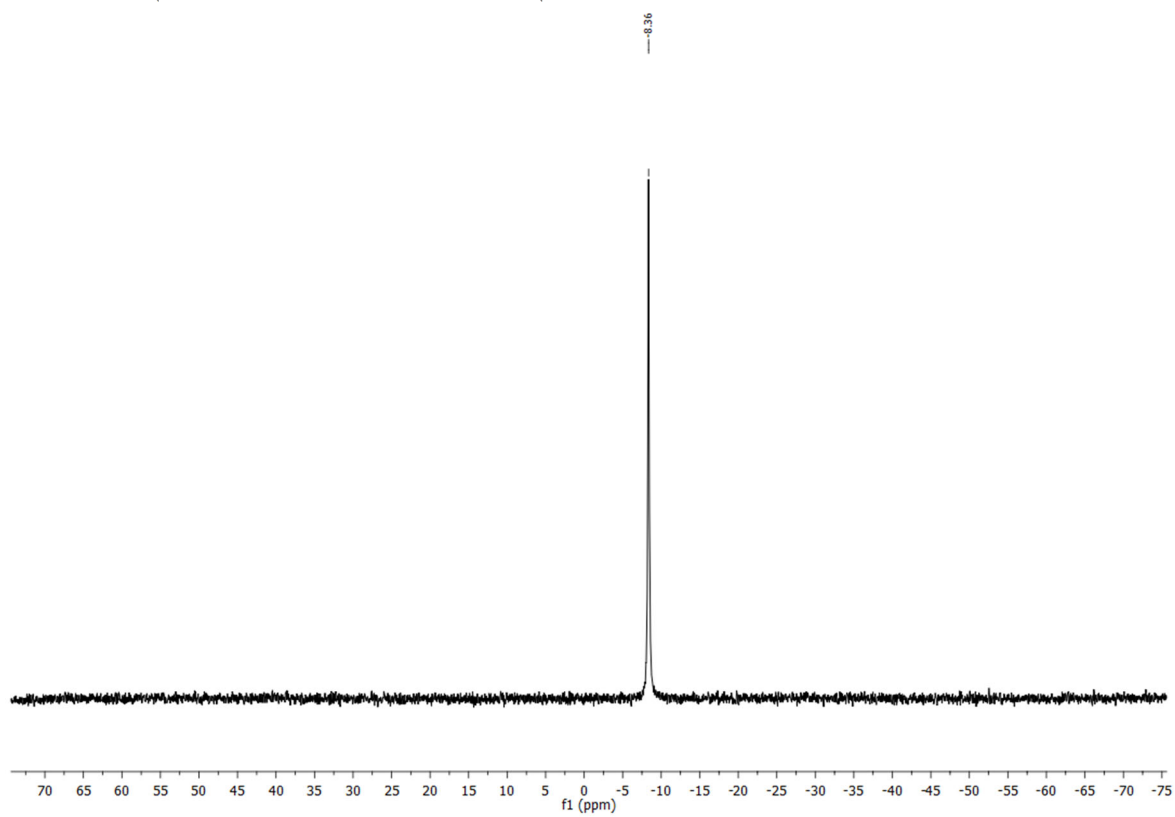



$^1\text{H}$  NMR (300 MHz,  $\text{CD}_3\text{COCD}_3$ , 25 °C)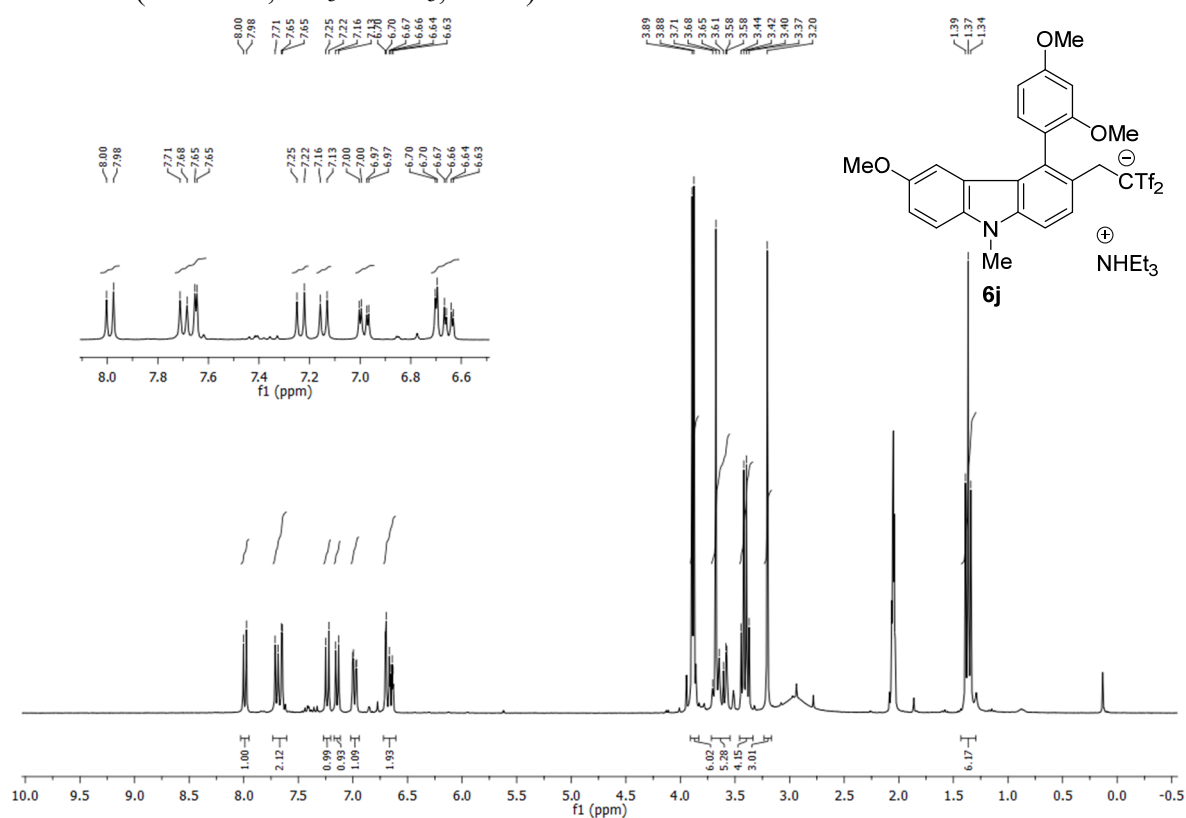 $^{13}\text{C}$  NMR (175 MHz,  $\text{CD}_3\text{COCD}_3$ , 25 °C)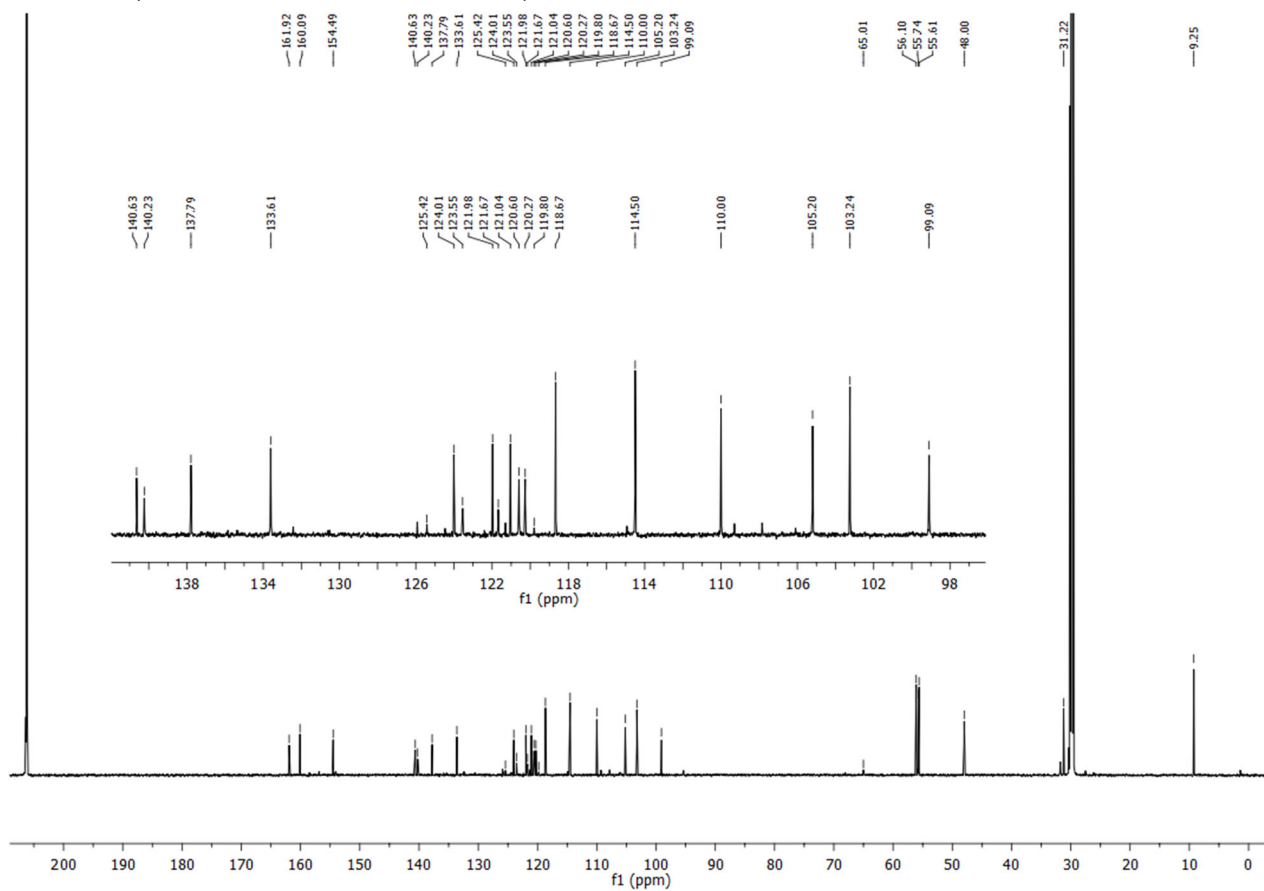

$^{19}\text{F}$  NMR (282 MHz,  $\text{CD}_3\text{COCD}_3$ , 25 °C)

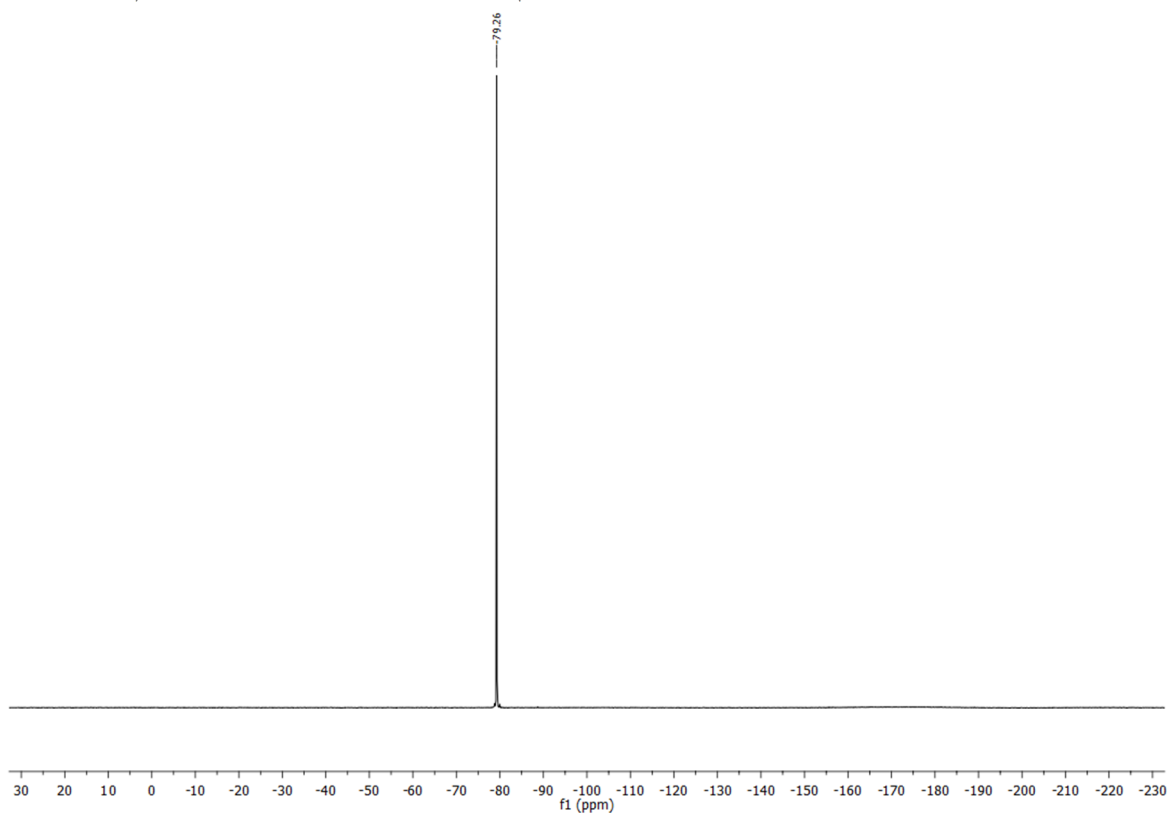

$^{23}\text{Na}$  NMR (132 MHz,  $\text{CD}_3\text{COCD}_3$ , 25 °C)

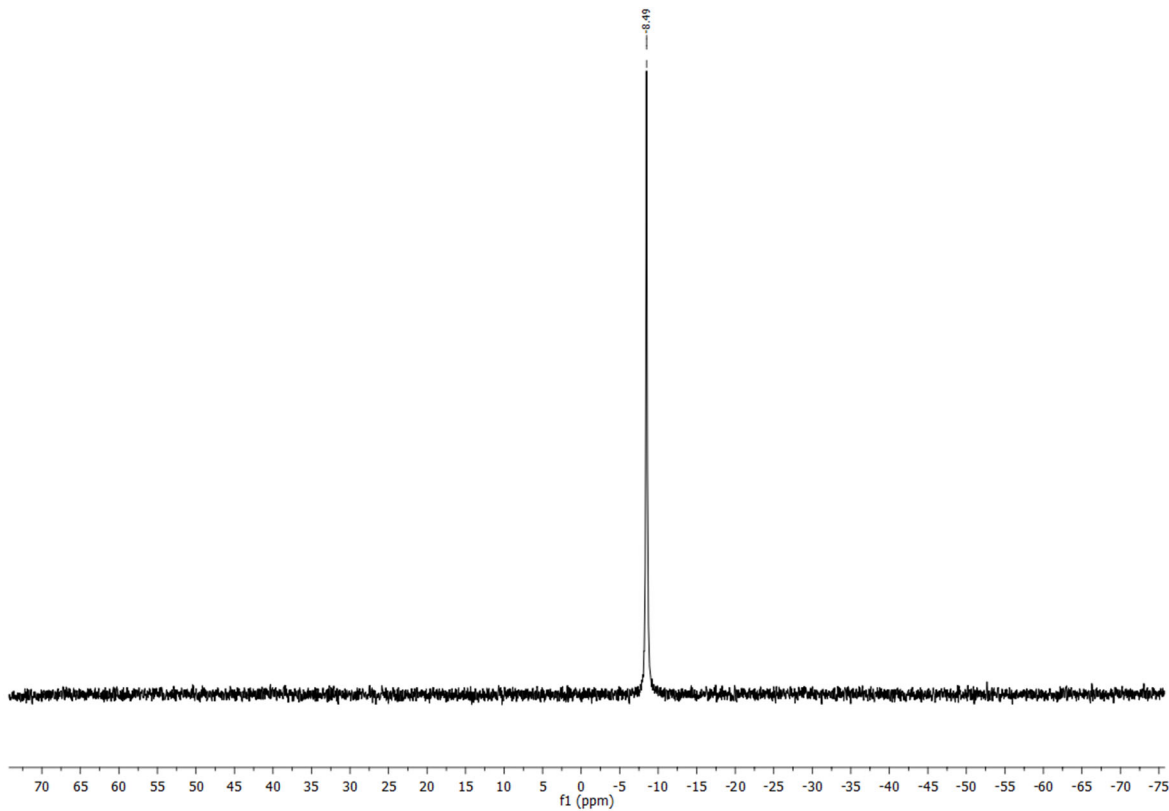

$^1\text{H}$  NMR (300 MHz,  $\text{CD}_3\text{COCD}_3$ , 25 °C)

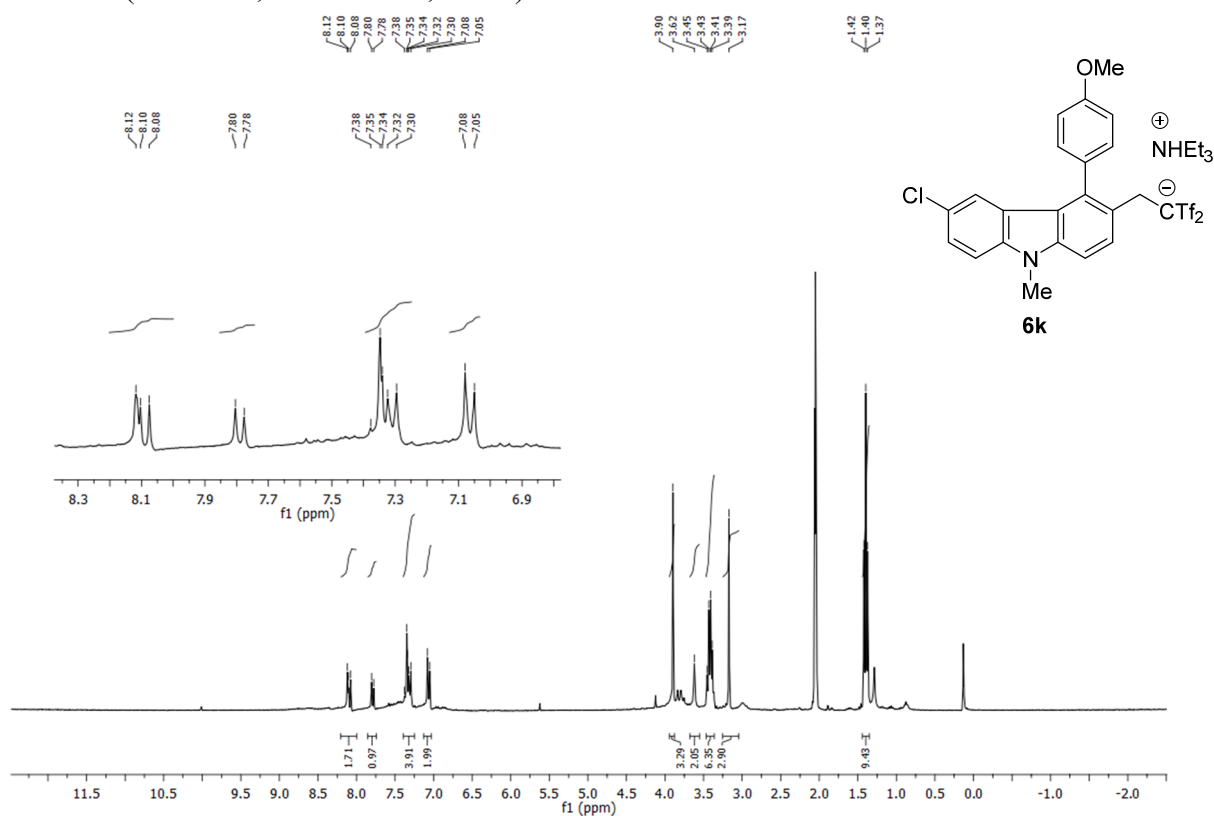

$^{13}\text{C}$  NMR (175 MHz,  $\text{CD}_3\text{COCD}_3$ , 25 °C)

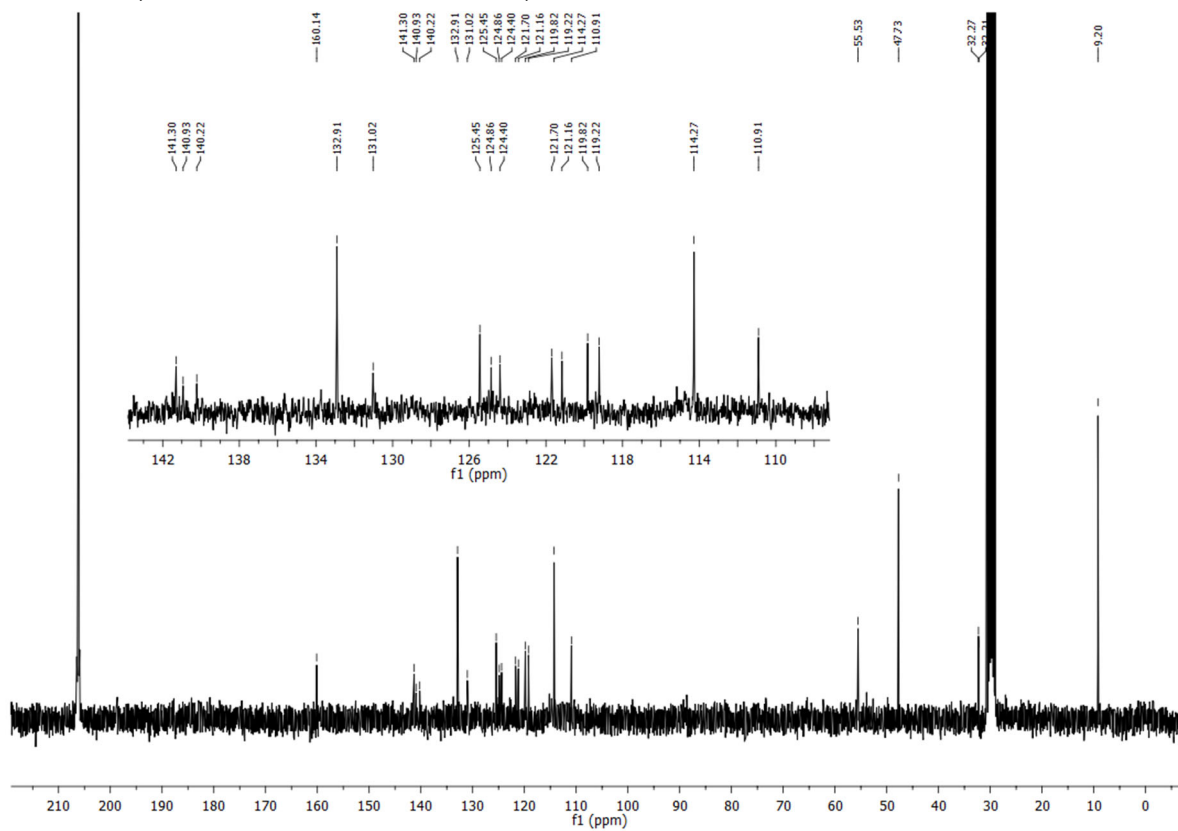

$^{19}\text{F}$  NMR (282 MHz,  $\text{CD}_3\text{COCD}_3$ , 25 °C)

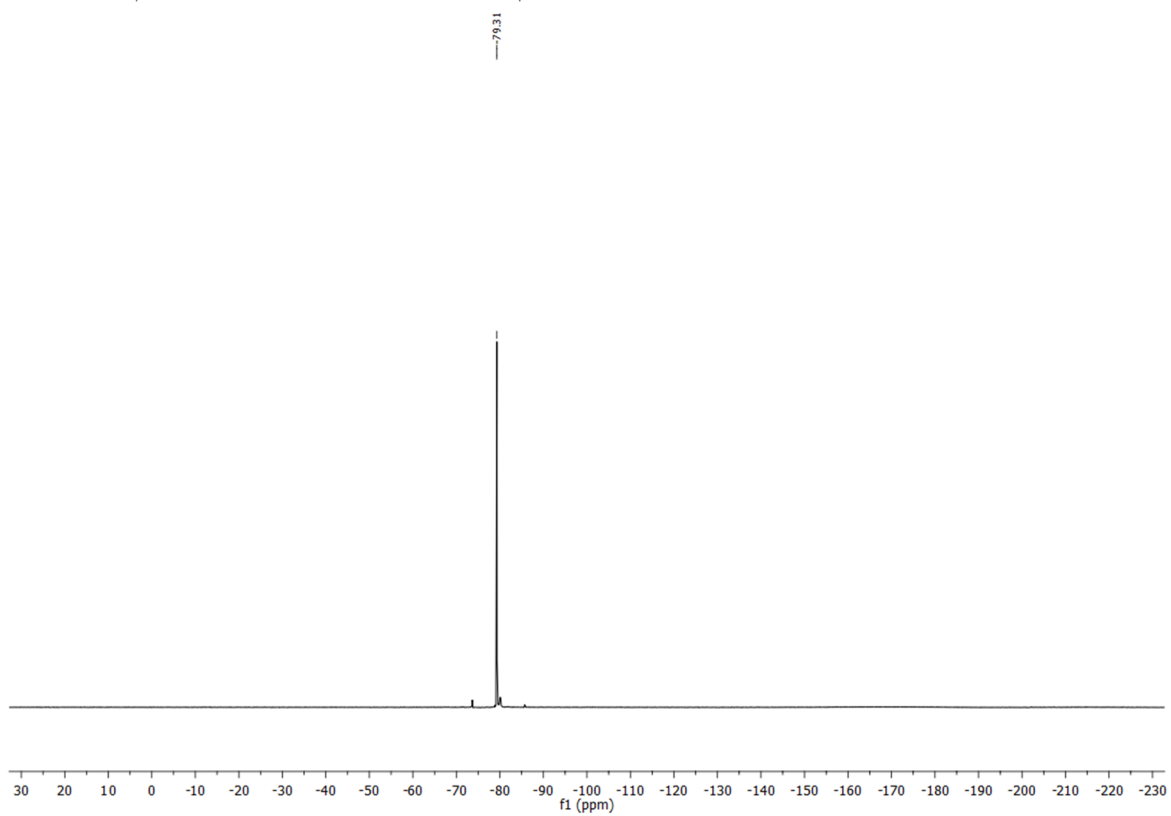

$^1\text{H}$  NMR (300 MHz,  $\text{CD}_3\text{COCD}_3$ , 25 °C)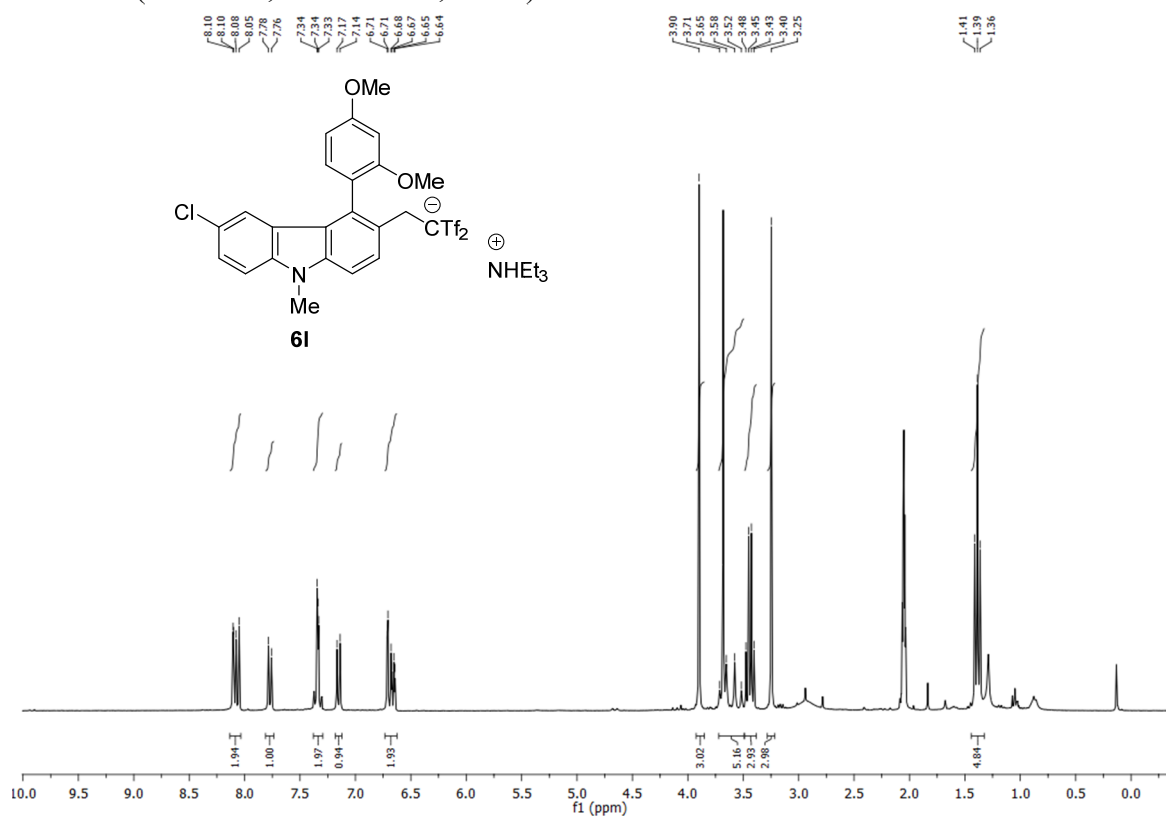 $^{13}\text{C}$  NMR (175 MHz,  $\text{CD}_3\text{COCD}_3$ , 25 °C)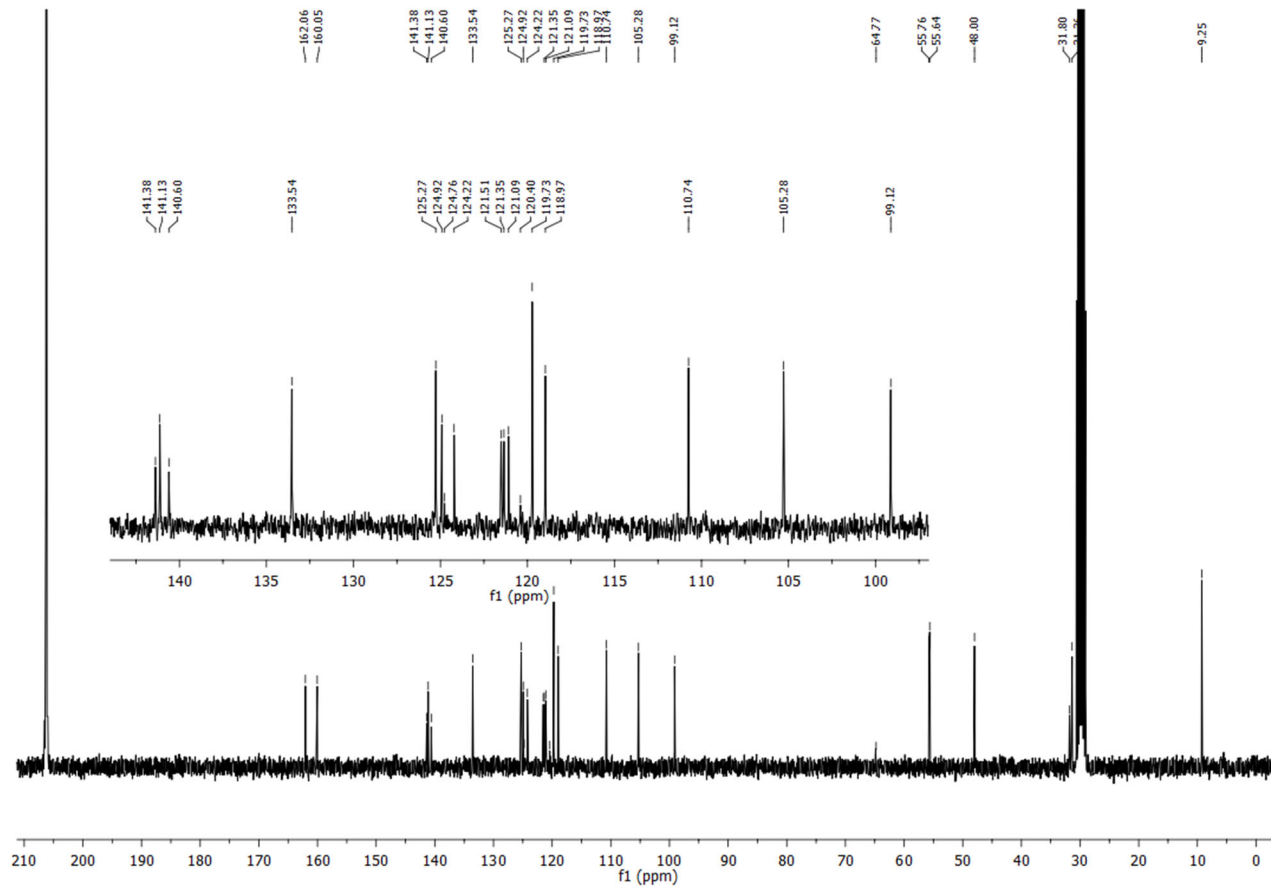

$^{19}\text{F}$  NMR (282 MHz,  $\text{CD}_3\text{COCD}_3$ , 25 °C)

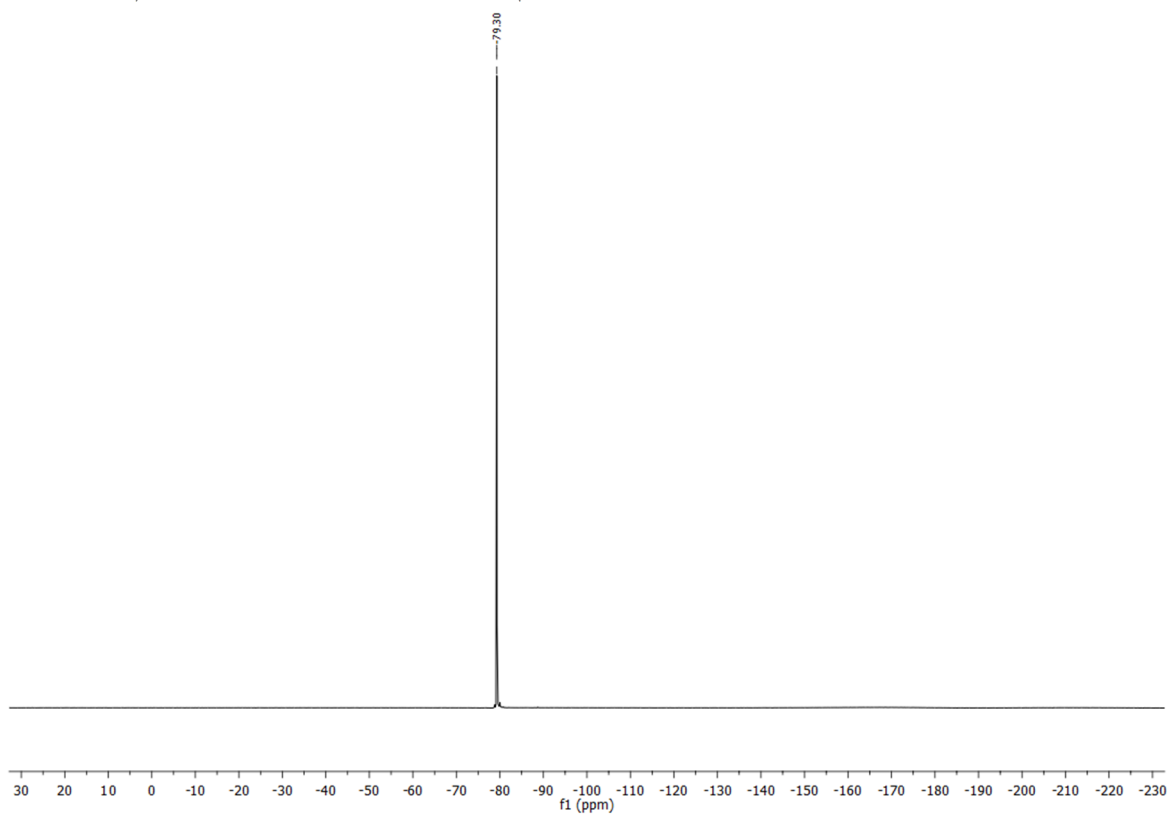

$^1\text{H}$  NMR (300 MHz,  $\text{CD}_3\text{COCD}_3$ , 25 °C)

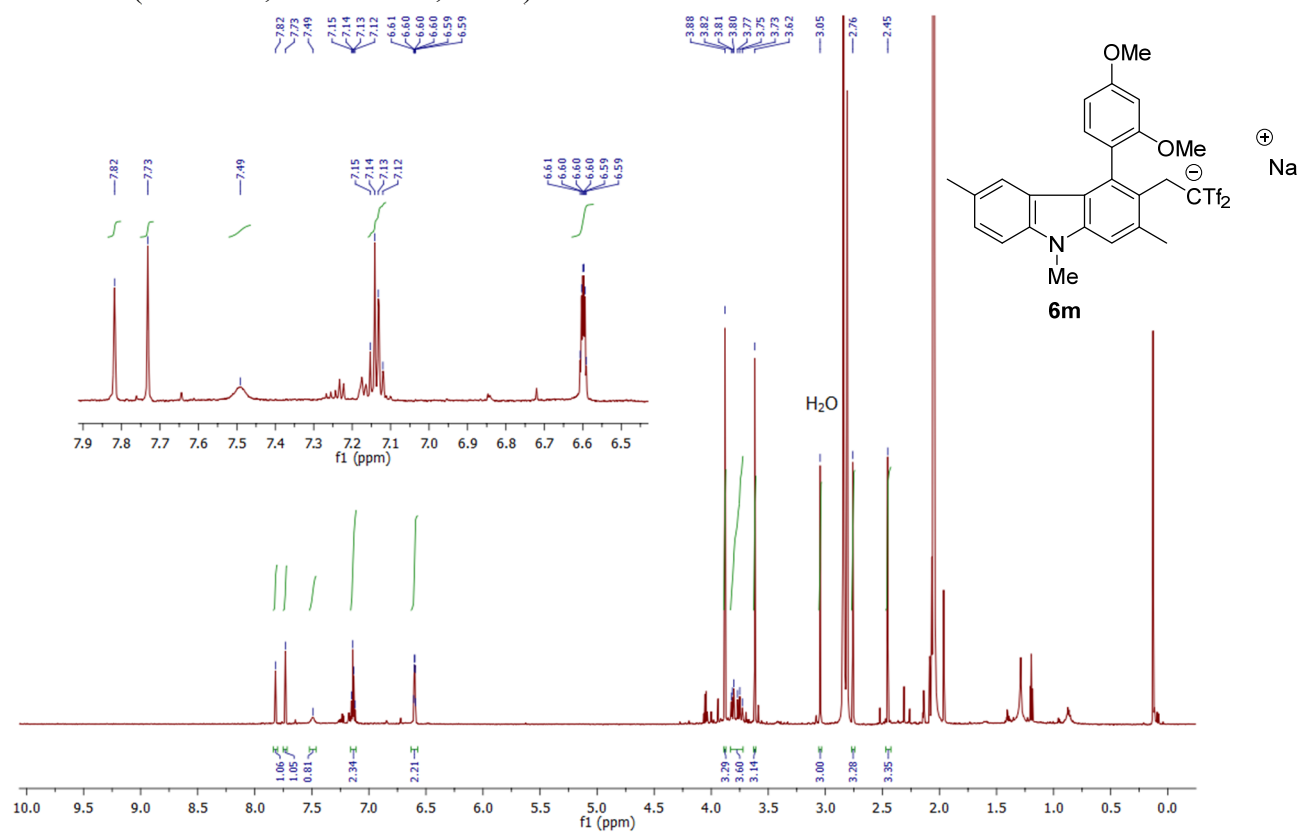

$^{13}\text{C}$  NMR (175 MHz,  $\text{CD}_3\text{COCD}_3$ , 25 °C)

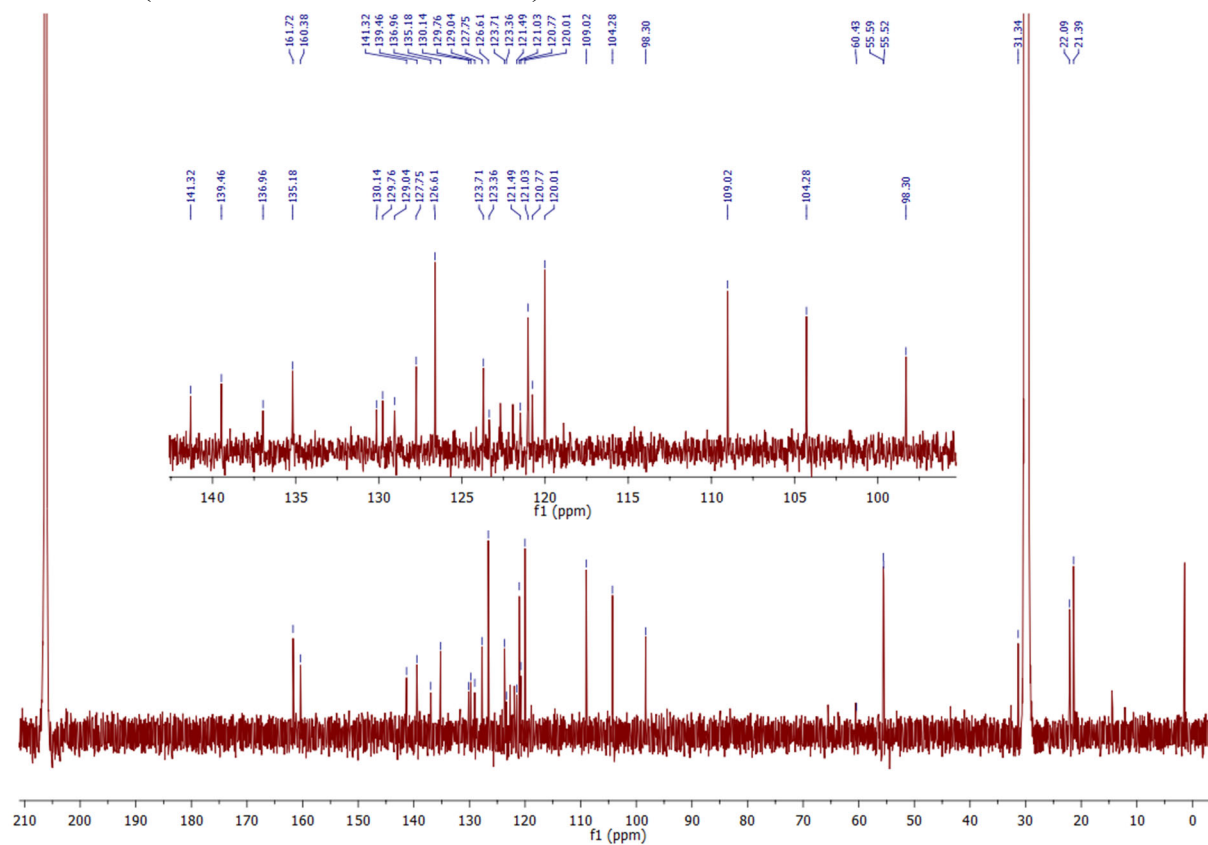

$^{19}\text{F}$  NMR (282 MHz,  $\text{CD}_3\text{COCD}_3$ , 25 °C)

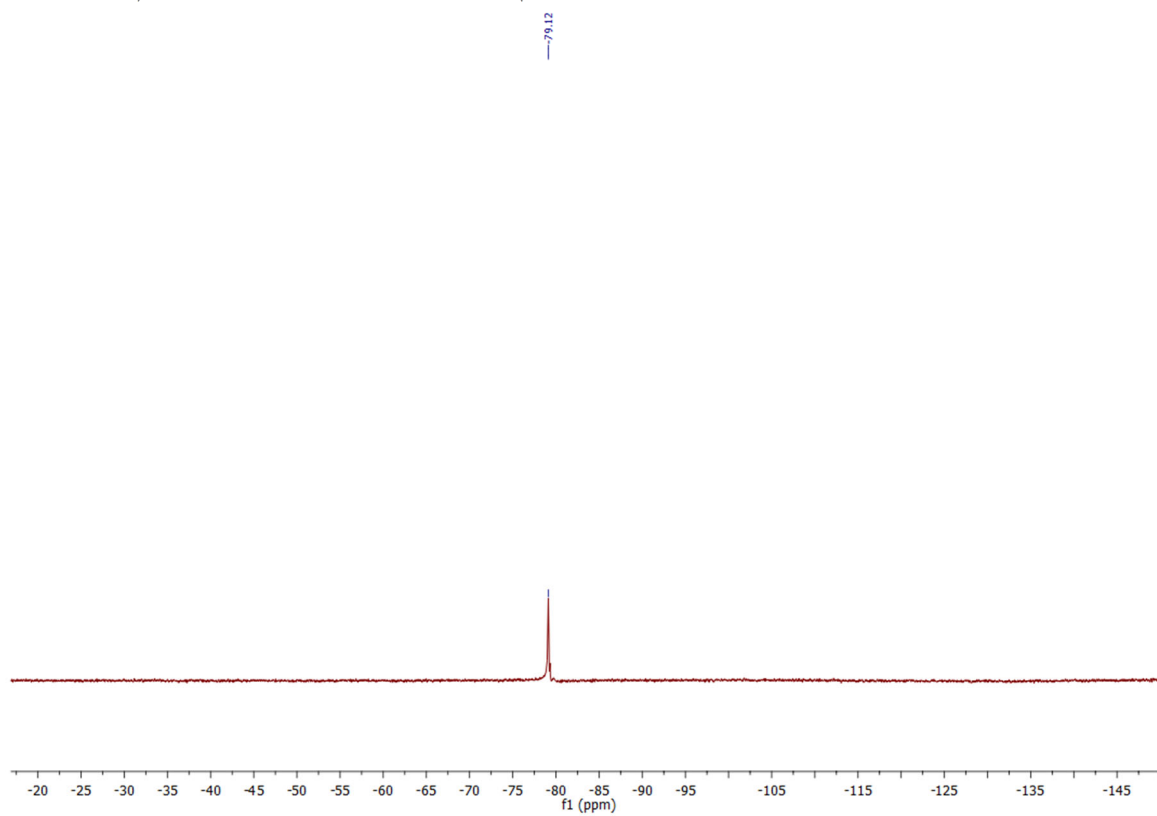

$^{23}\text{Na}$  NMR (132 MHz,  $\text{CD}_3\text{COCD}_3$ , 25 °C)

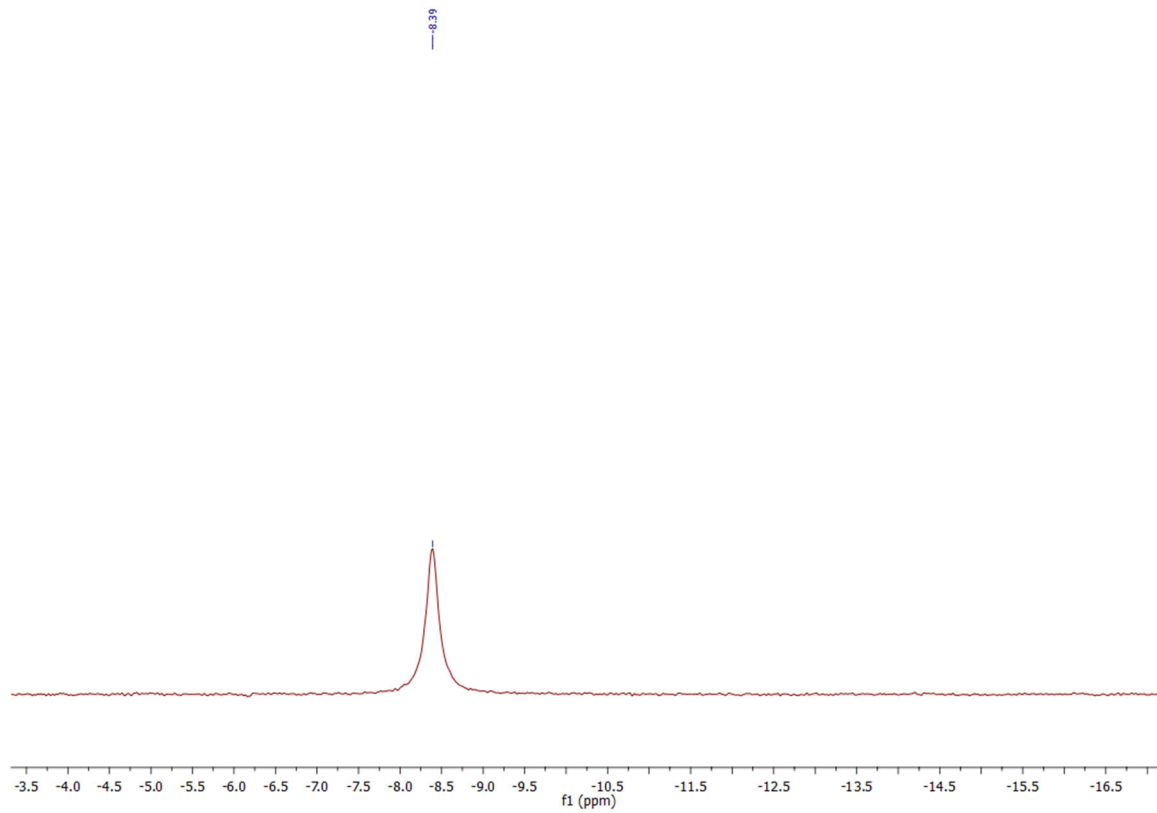



<sup>1</sup>H NMR (600 MHz, CD<sub>3</sub>CN, rt)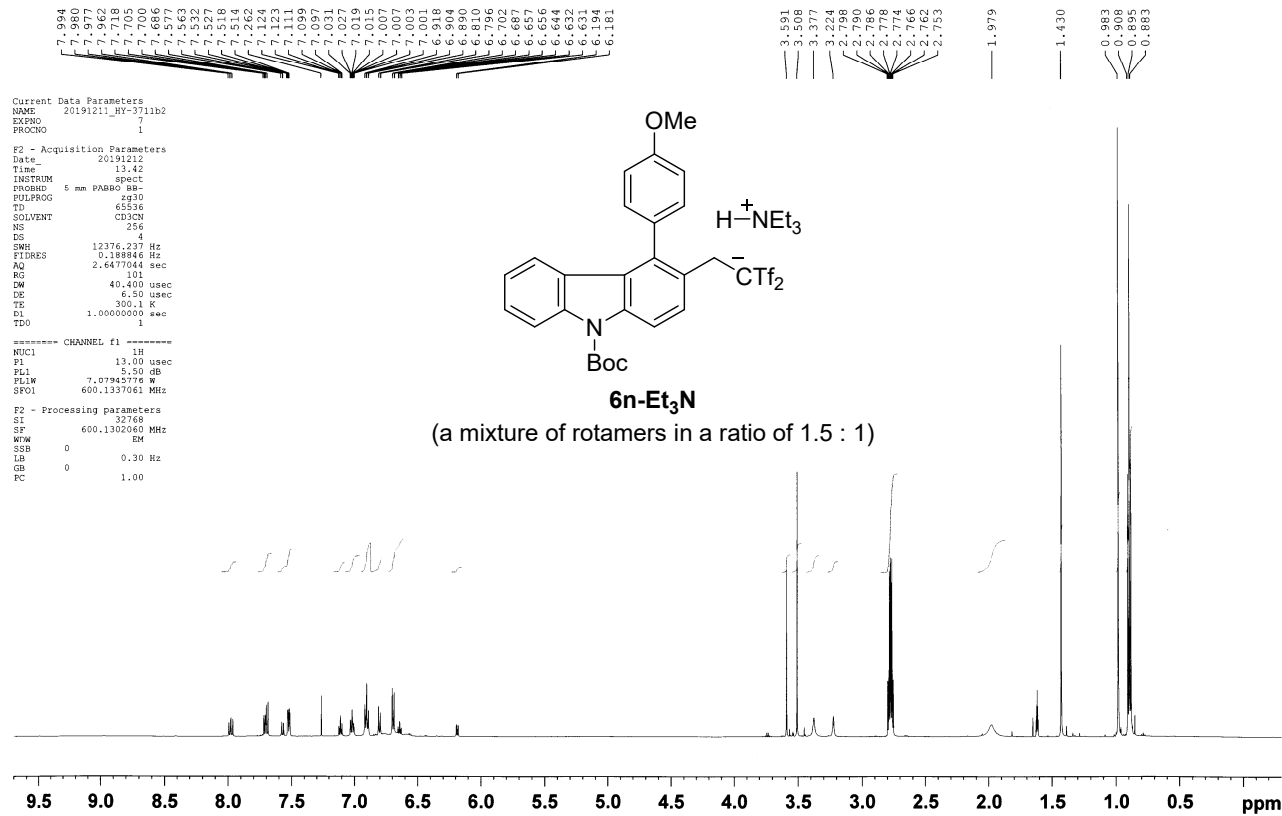<sup>13</sup>C NMR (150 MHz, CD<sub>3</sub>CN, rt)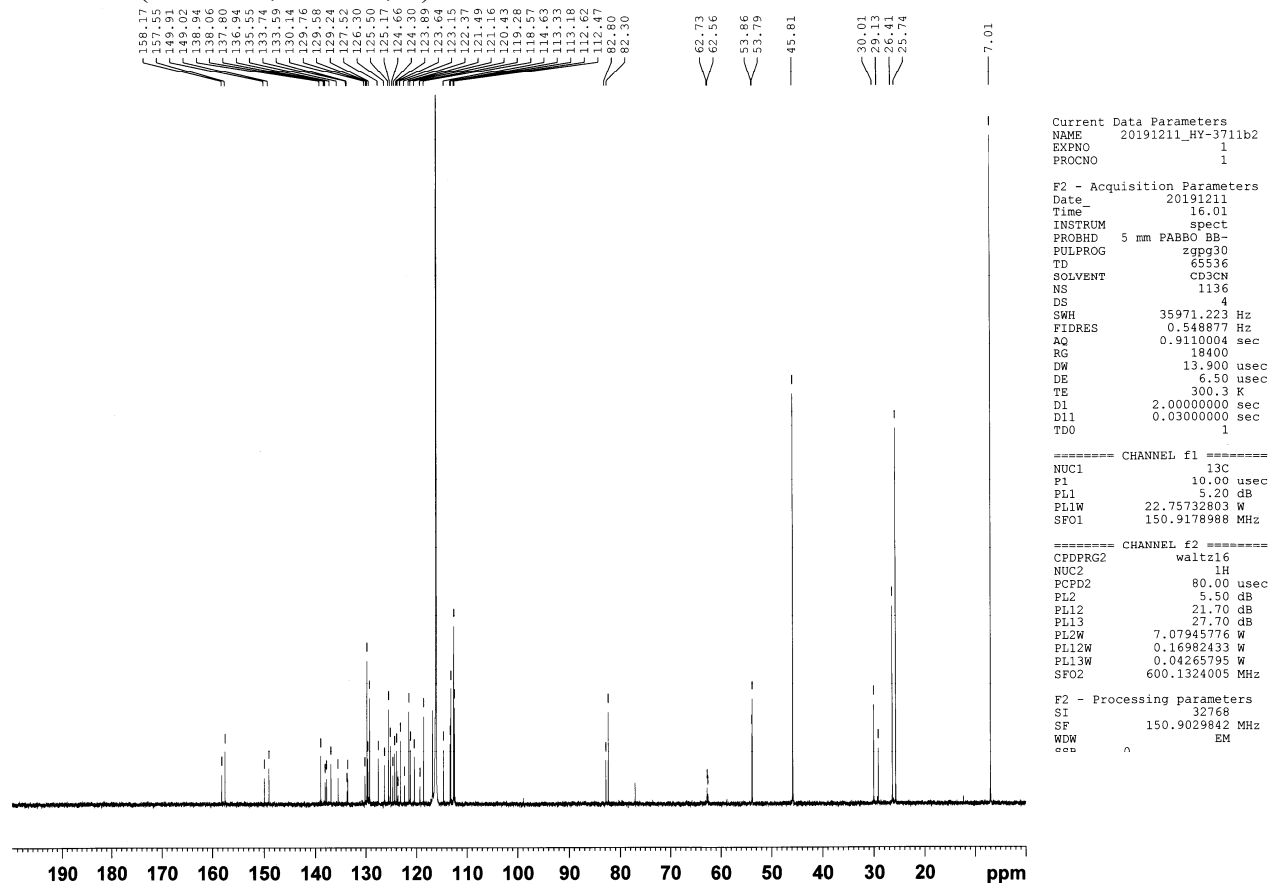

<sup>19</sup>F NMR with PhCF<sub>3</sub> (376 MHz, CD<sub>3</sub>CN, rt)

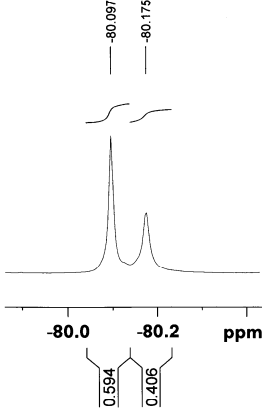

-63.714  
-80.097  
-80.175

```

Current Data Parameters
NAME HY-3711b2
EXPNO 6
PROCNO 1

F2 - Acquisition Parameters
Date_ 20191212
Time 16.01
INSTRUM spect
PROBHD 5 mm PABBO BB/
PULPROG zgpg30
TD 131072
SOLVENT CD3CN
NS 15
DS 4
SWH 89285.711 Hz
FIDRES 0.681198 Hz
AQ 0.7340532 sec
RG 204.44
DW 5.600 usec
DE 6.50 usec
TE 295.2 K
D1 1.0000000 sec
TD0 1

===== CHANNEL f1 =====
NUC1 19F
P1 14.00 usec
PLW1 24.00000000 W
SFO1 376.460164 MHz

F2 - Processing parameters
SI 65536
SF 376.4985764 MHz
WUW EM
SBS 0
LA 0.30 Hz
GB 0
PC 1.00
    
```

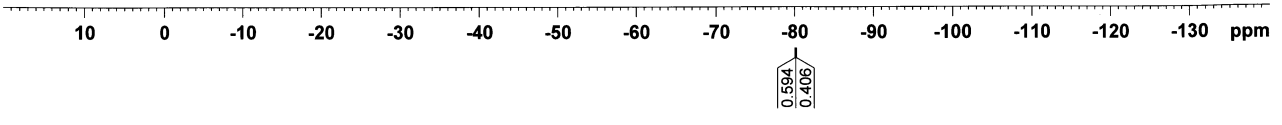

$^1\text{H}$  NMR (300 MHz,  $\text{CD}_3\text{COCD}_3$ , 25 °C)

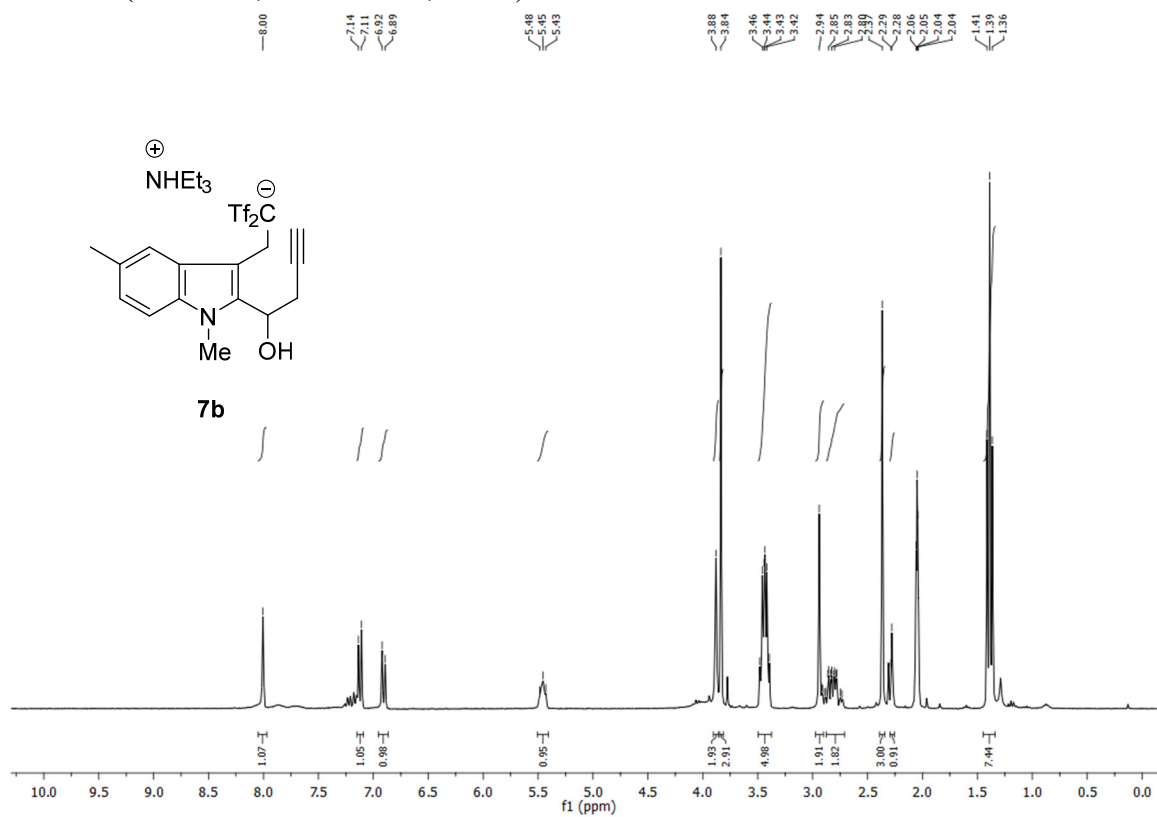

$^{13}\text{C}$  NMR (175 MHz,  $\text{CD}_3\text{COCD}_3$ , 25 °C)

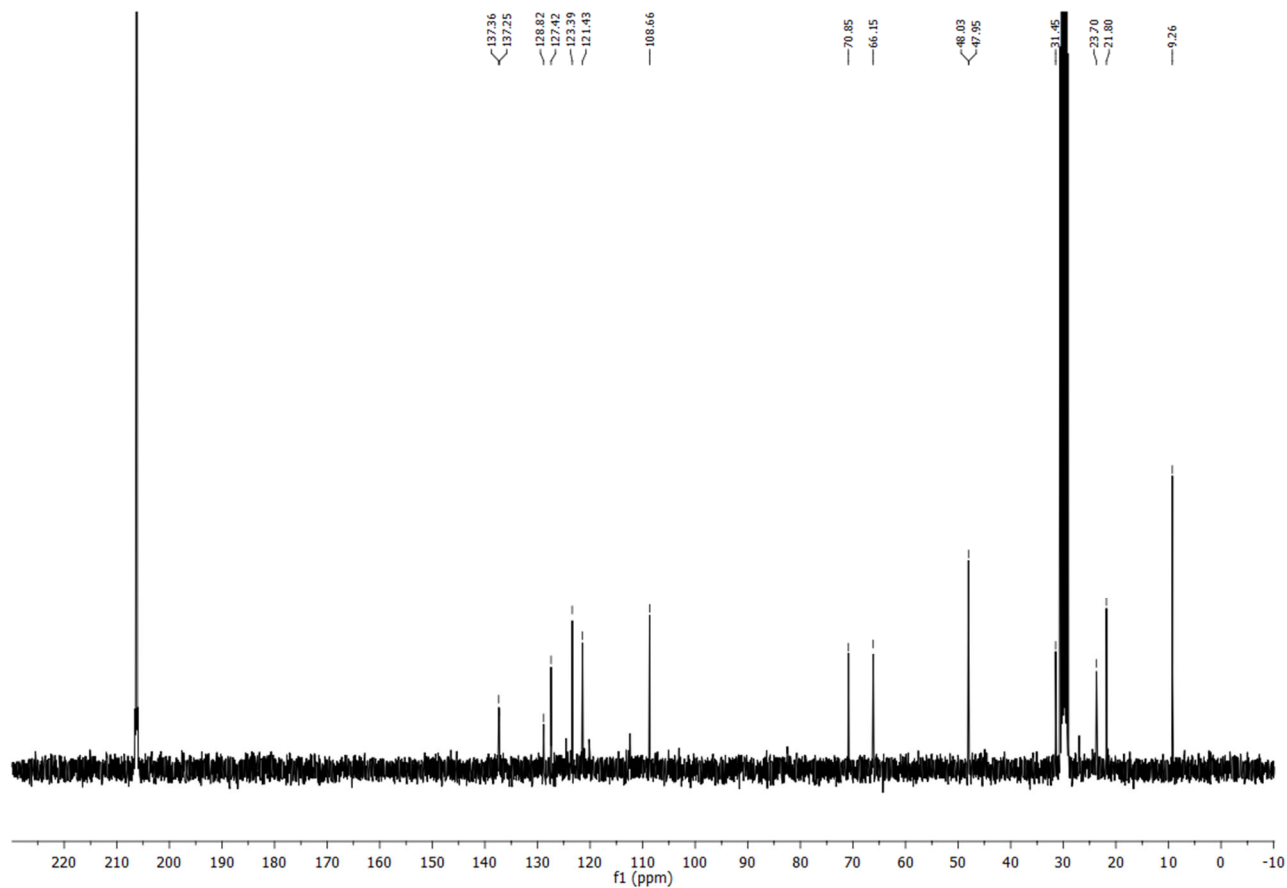

$^{19}\text{F}$  NMR (282 MHz,  $\text{CD}_3\text{COCD}_3$ , 25 °C)

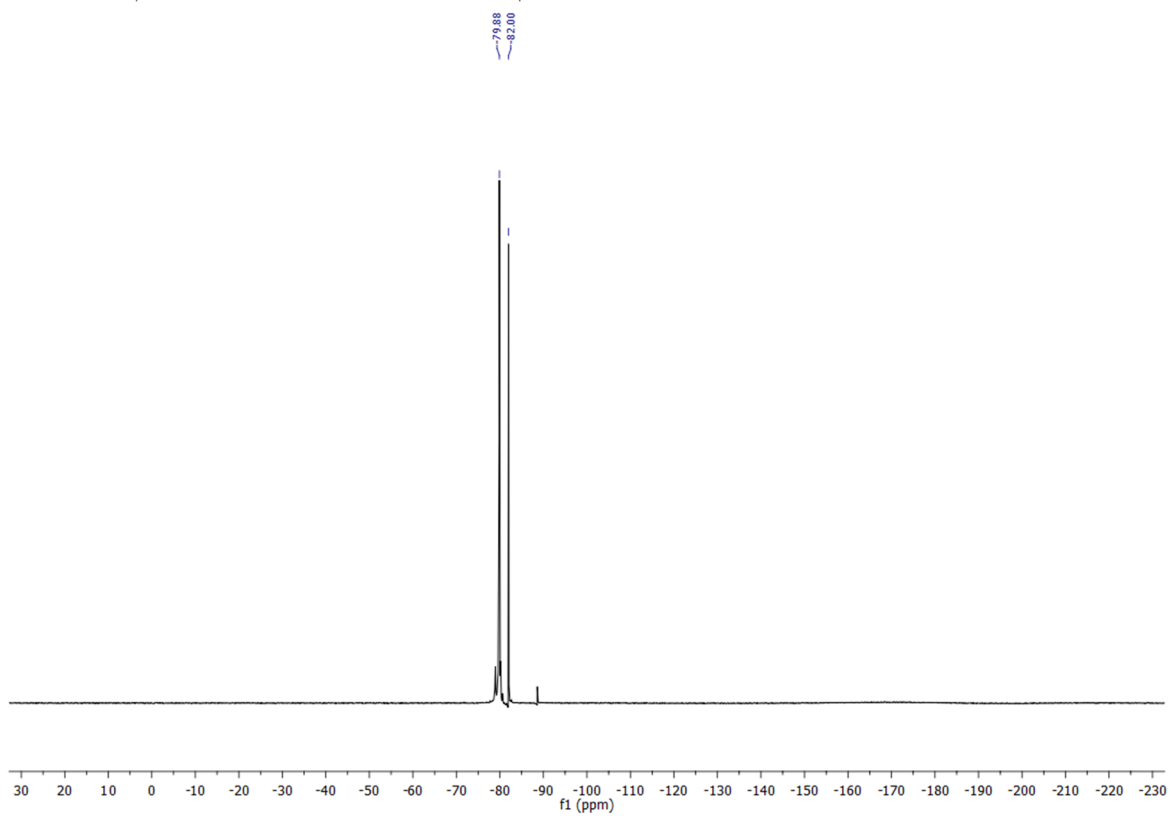

$^1\text{H}$  NMR (300 MHz,  $\text{CDCl}_3$ , 25 °C)

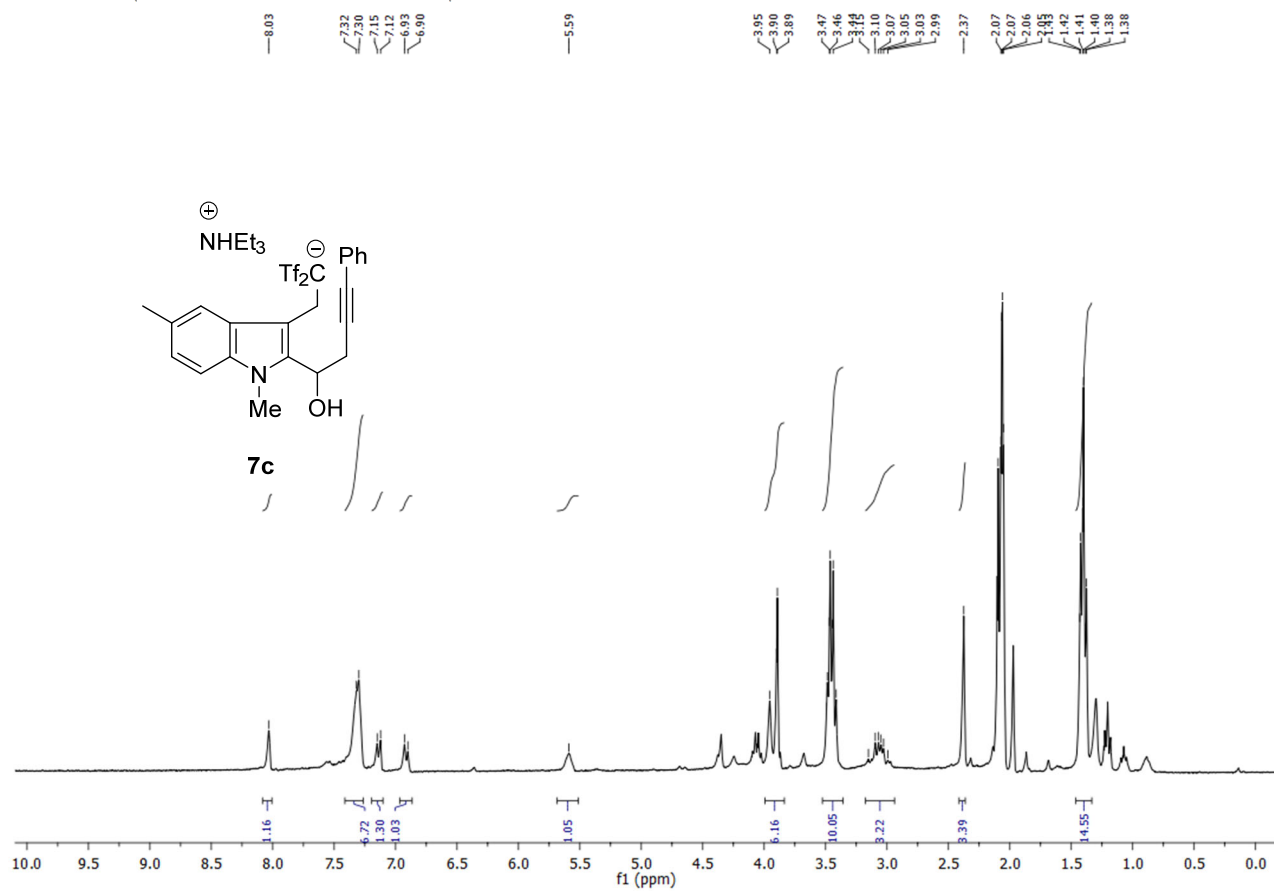

Compound **7c** is unstable in solution and a good quality  $^{13}\text{C}$  NMR spectrum cannot be recorded.



$^{19}\text{F}$  NMR (282 MHz,  $\text{CDCl}_3$ , 25 °C)

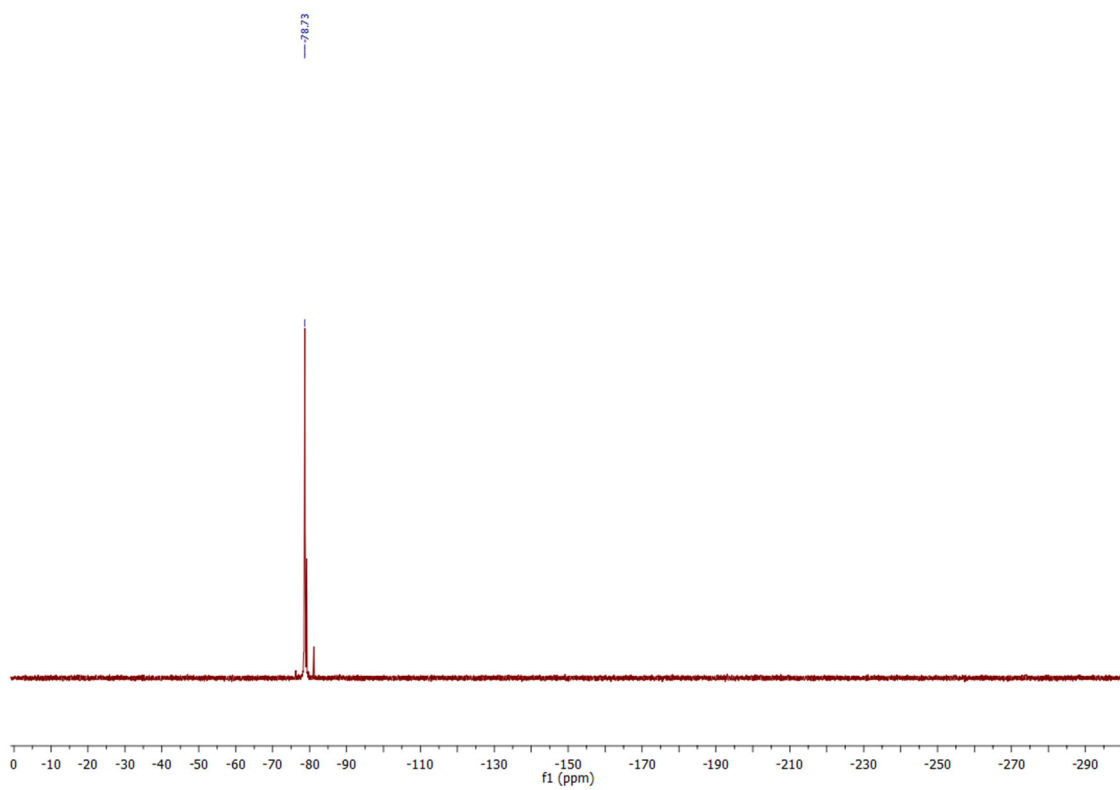

<sup>1</sup>H NMR (400 MHz, CDCl<sub>3</sub>, rt)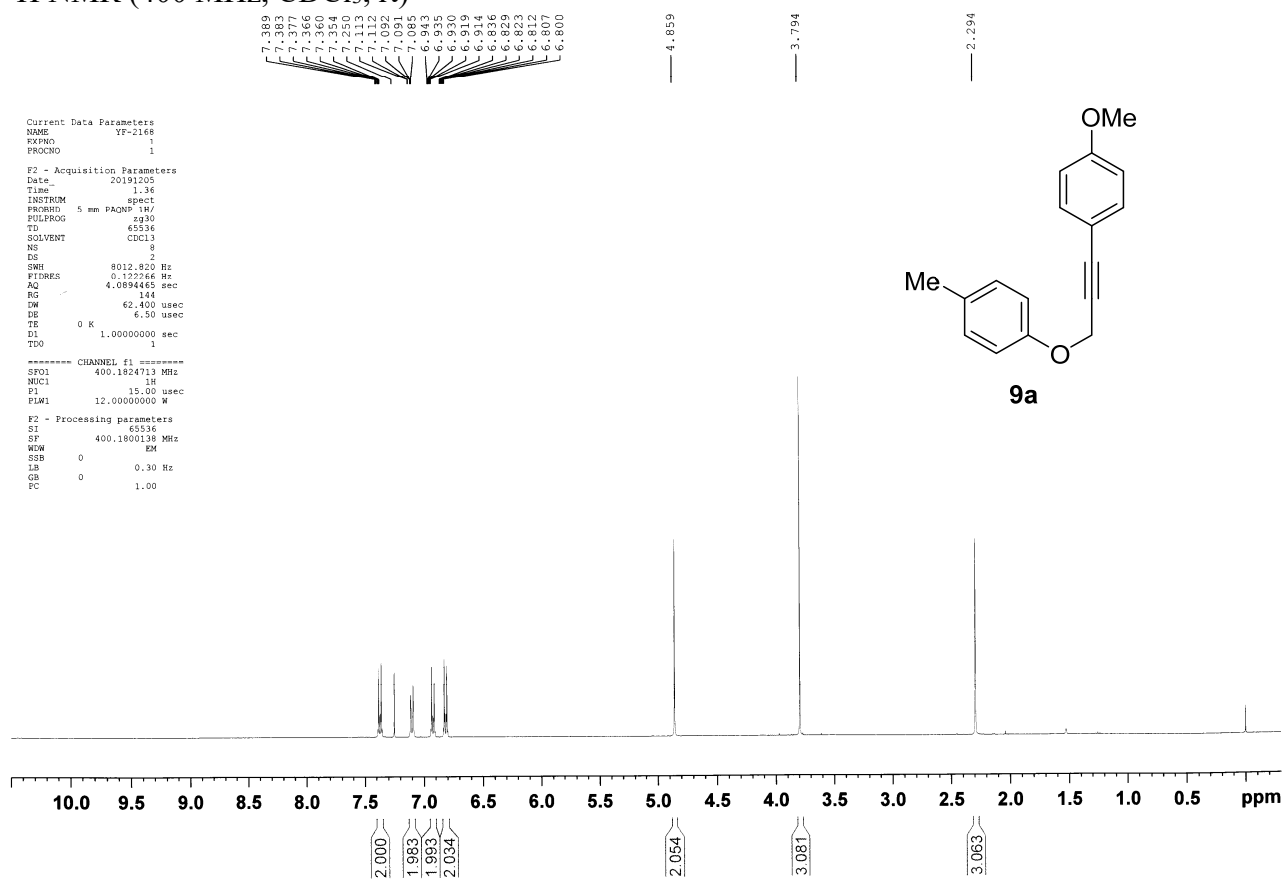



$^{13}\text{C}$  NMR (100 MHz,  $\text{CDCl}_3$ , rt)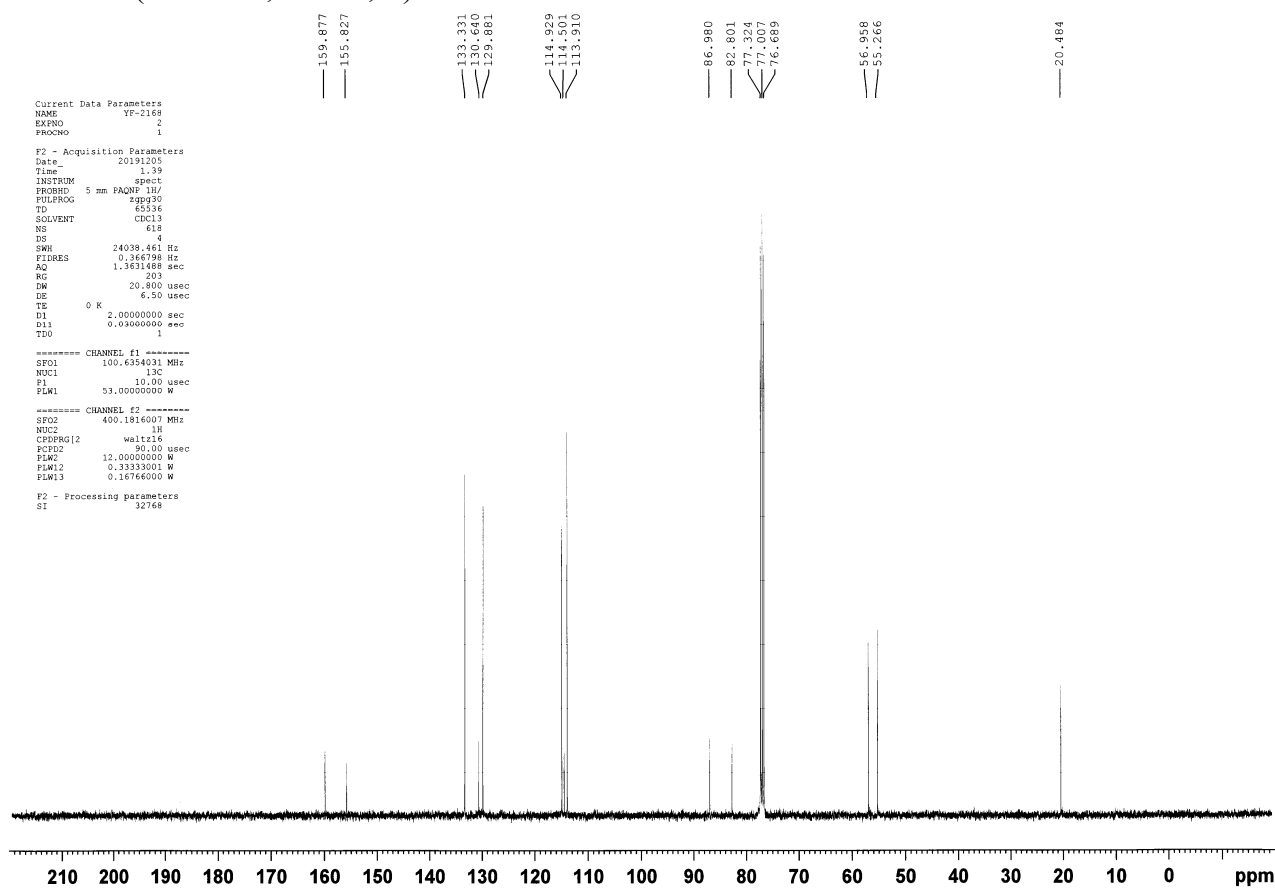

$^1\text{H}$  NMR (400 MHz,  $\text{CDCl}_3$ , rt)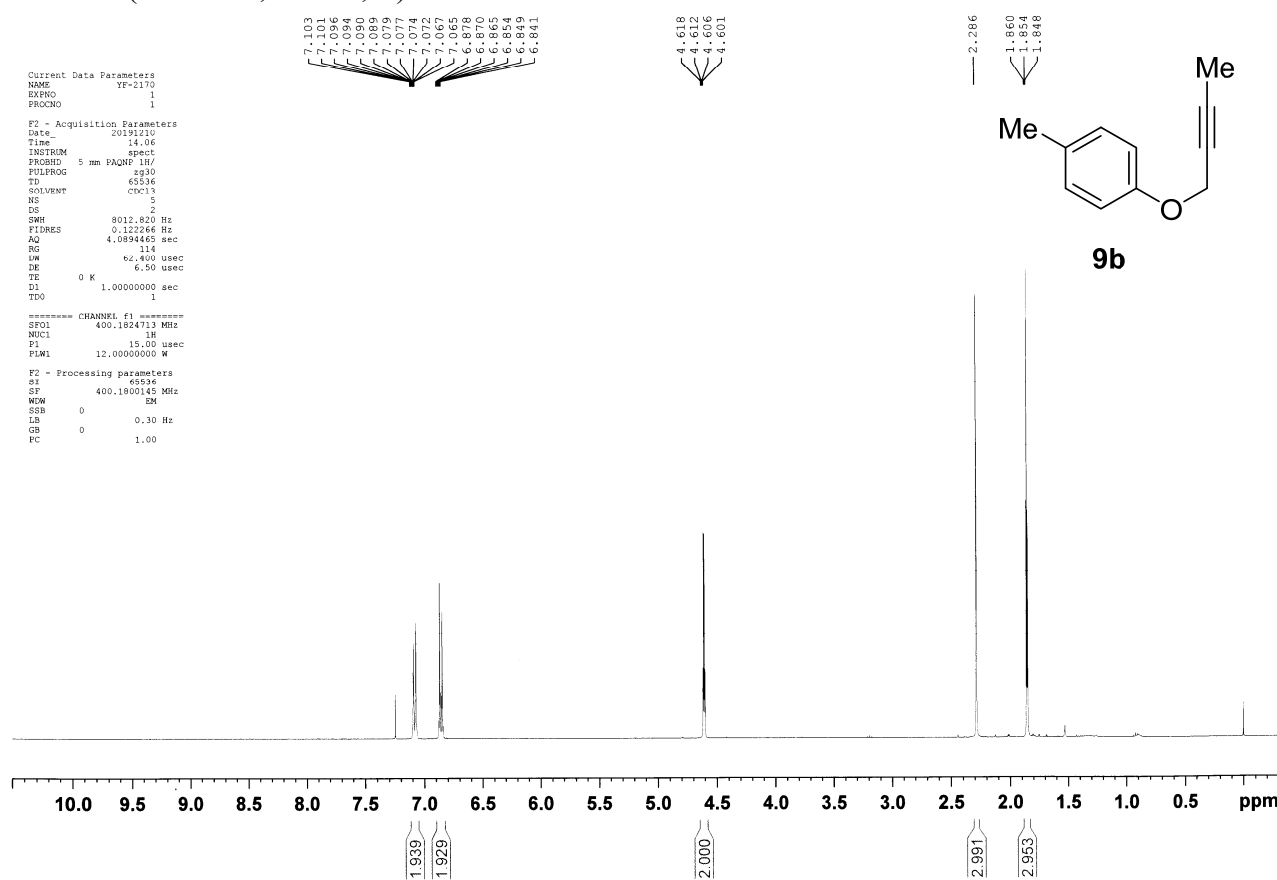 $^{13}\text{C}$  NMR (100 MHz,  $\text{CDCl}_3$ , rt)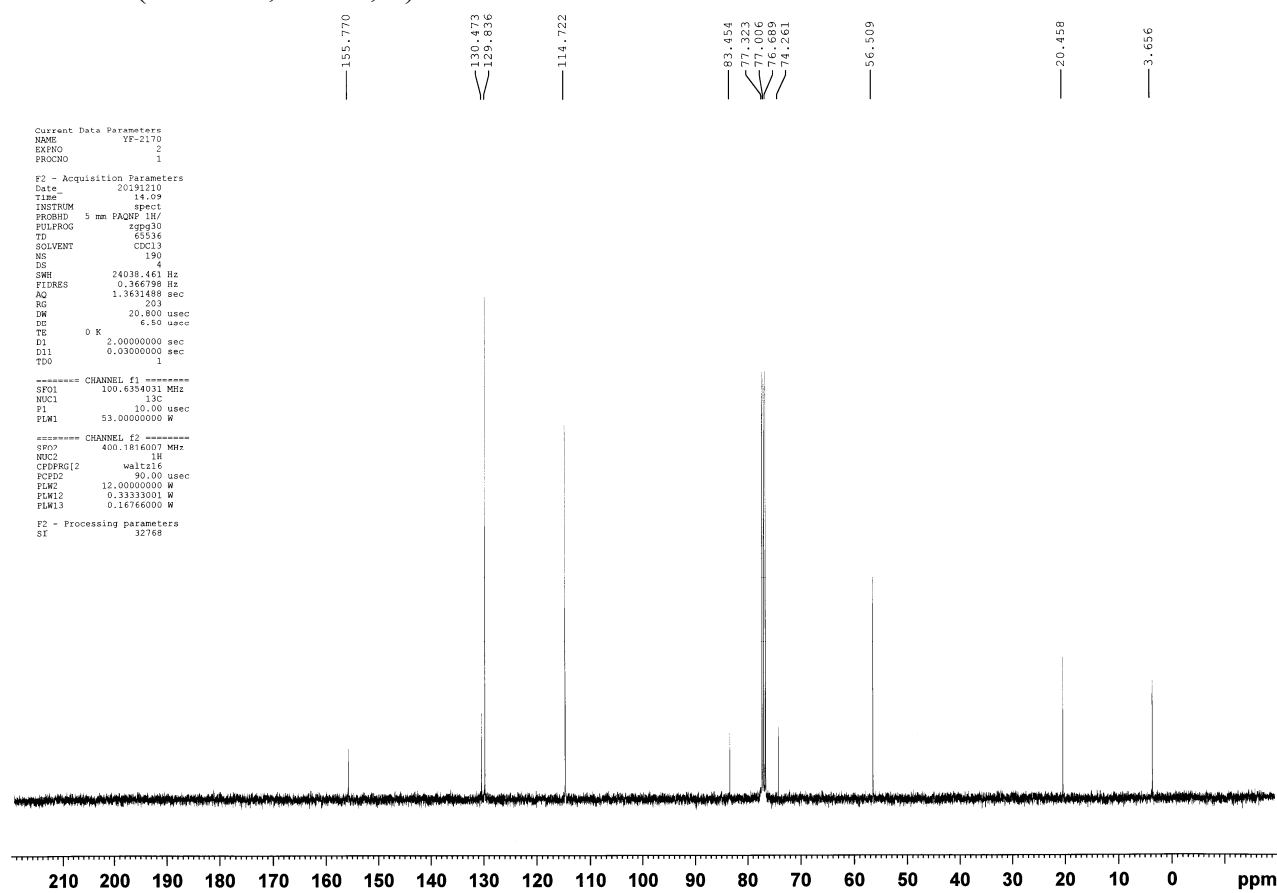

<sup>1</sup>H NMR (400 MHz, CDCl<sub>3</sub>, rt)

```

Current Data Parameters
NAME HY-3137
EXPNO 1
PROCNO 1

F2 - Acquisition Parameters
Date_ 20191210
Time 18.19
INSTRUM spect
PROBHD 5 mm PABBO BB/
PULPROG zg30
TD 65536
SOLVENT CDCl3
NS 8
DS 2
SWH 8223.685 Hz
FIDRES 0.125483 Hz
AQ 3.9846387 sec
RG 583
DM 60.800 usec
DE 6.50 usec
TE 296.0 K
D1 1.00000000 sec
TD0 1

```

```

===== CHANNEL f1 =====
NUC1 1H
P1 10.00 usec
PLW1 16.00000000 W
SF01 400.1324710 MHz

```

```

F2 - Processing parameters
SI 65536
SF 400.1300103 MHz
WDW EM
SSB 0
LB 0.30 Hz
GB 0
PC 1.00

```

7.259  
7.148  
7.128  
6.949  
6.882  
6.821  
6.719  
6.609  
6.362

4.977

3.849

3.188  
3.108  
3.078  
3.059  
3.041

2.099

1.296  
1.278  
1.260

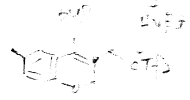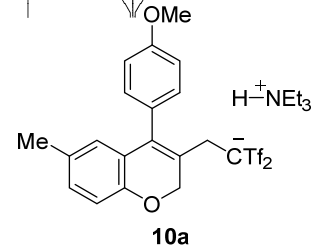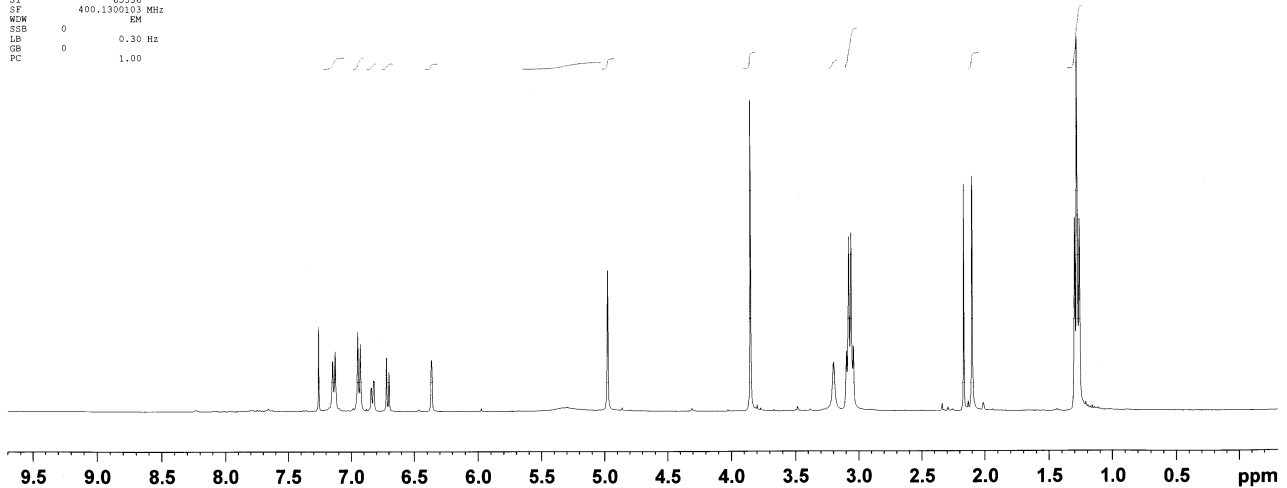

9.5 9.0 8.5 8.0 7.5 7.0 6.5 6.0 5.5 5.0 4.5 4.0 3.5 3.0 2.5 2.0 1.5 1.0 0.5 ppm

2.000  
2.023  
0.938  
0.899

1.162

1.878

2.860

1.524  
6.680

2.686

10.247

<sup>13</sup>C NMR (100 MHz, CDCl<sub>3</sub>, rt)

158.56  
151.32  
131.28  
130.98  
129.94  
129.63  
128.97  
128.24  
126.34  
122.91  
119.65  
114.92  
113.57

77.40

77.08

76.76

66.97

59.99

55.18

46.78

28.69

20.70

8.58

```

Current Data Parameters
NAME HY-3709a
EXPNO 4
PROCNO 1

```

```

F2 - Acquisition Parameters
Date_ 20191209
Time 15.49
INSTRUM spect
PROBHD 5 mm PABBO BB/
PULPROG zgpg30
TD 65536
SOLVENT CDCl3
NS 115
DS 4
SWH 24038.461 Hz
FIDRES 0.366798 Hz
AQ 1.3631988 sec
RG 204.44
DM 20.800 usec
DE 6.50 usec
TE 296.2 K
D1 2.00000000 sec
D11 0.03000000 sec
TD0 1

```

```

===== CHANNEL f1 =====
NUC1 13C
P1 10.00 usec
PLW1 85.00000000 W
SF01 100.6228293 MHz

```

```

===== CHANNEL f2 =====
CPDPRG2 waltz16
NUC2 1H
PCPD2 90.00 usec
PLW2 18.00000000 W
PLW12 0.22222000 W
PLW13 0.18000001 W
SF02 400.1316005 MHz

```

```

F2 - Processing parameters
SI 32768
SF 100.6127690 MHz
WDW EM
SSB 0
LB 1.00 Hz
GB 0
PC 1.40

```

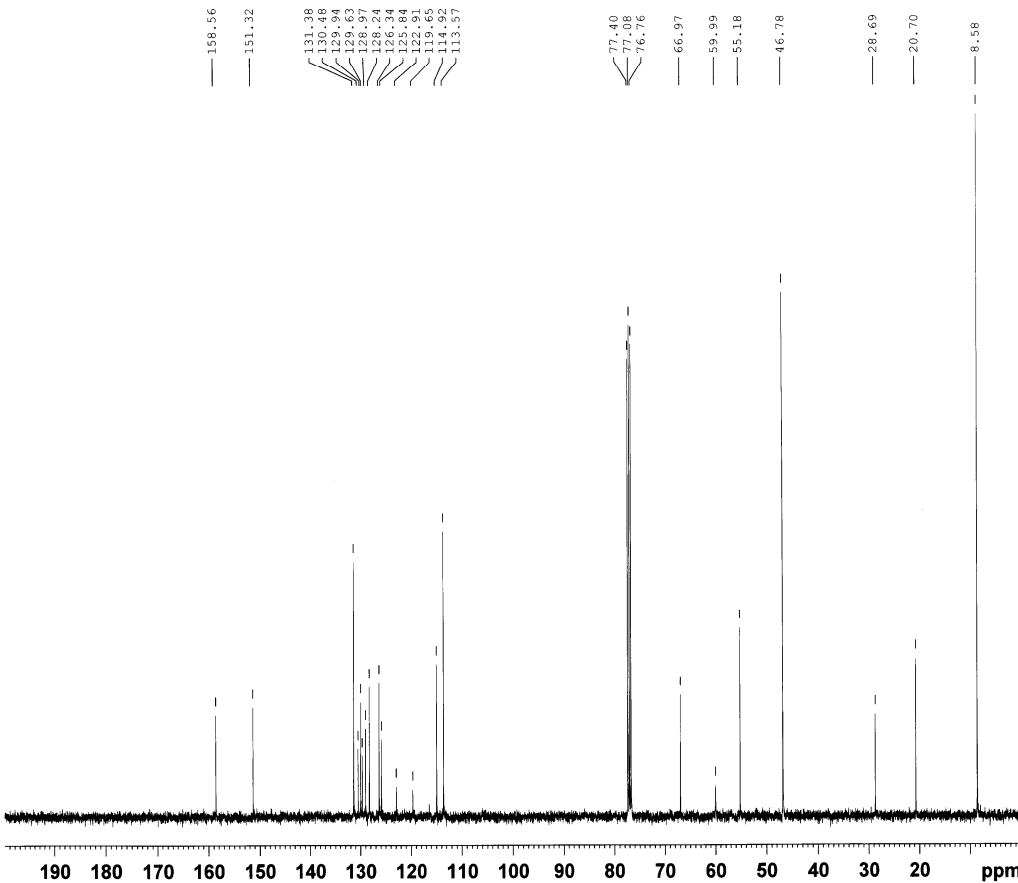

190 180 170 160 150 140 130 120 110 100 90 80 70 60 50 40 30 20 ppm

$^{19}\text{F}$  NMR with  $\text{PhCF}_3$  (376 MHz,  $\text{CDCl}_3$ , rt)

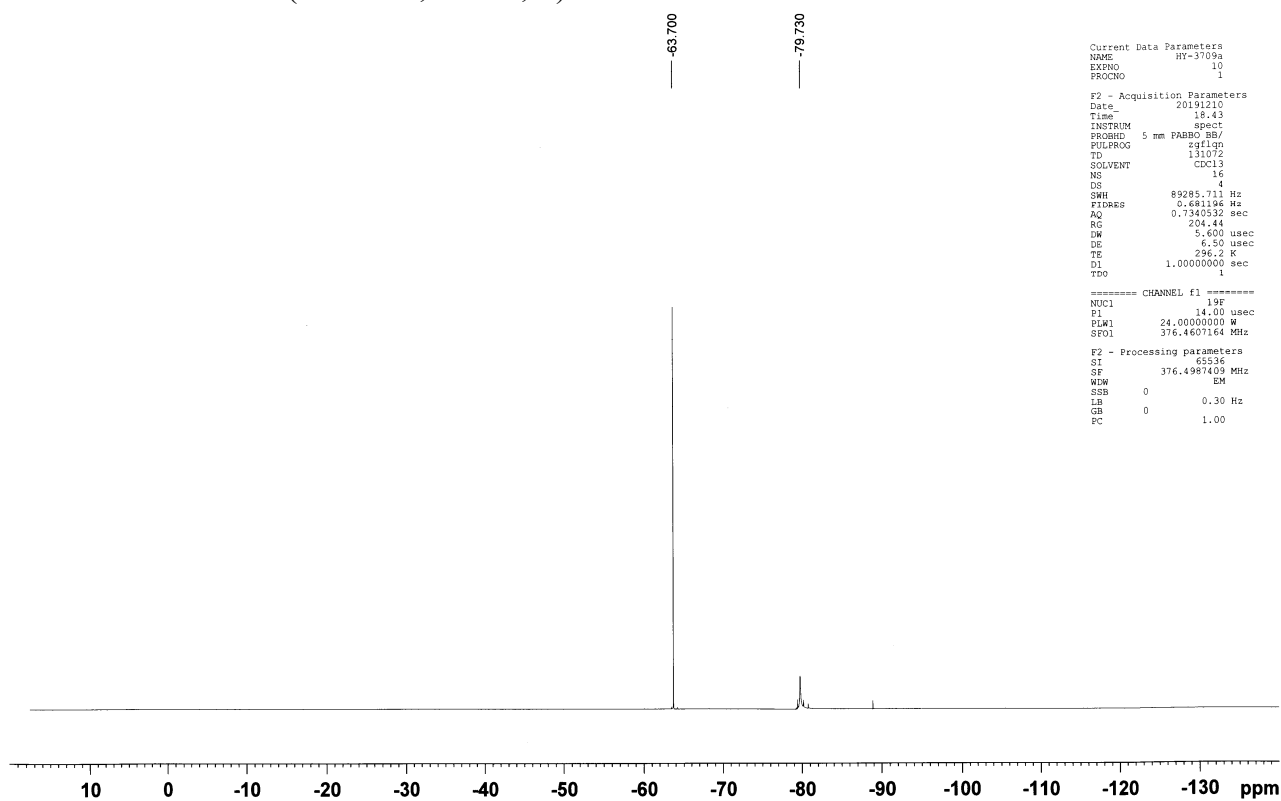

$^1\text{H}$  NMR (400 MHz,  $\text{CDCl}_3$ , rt)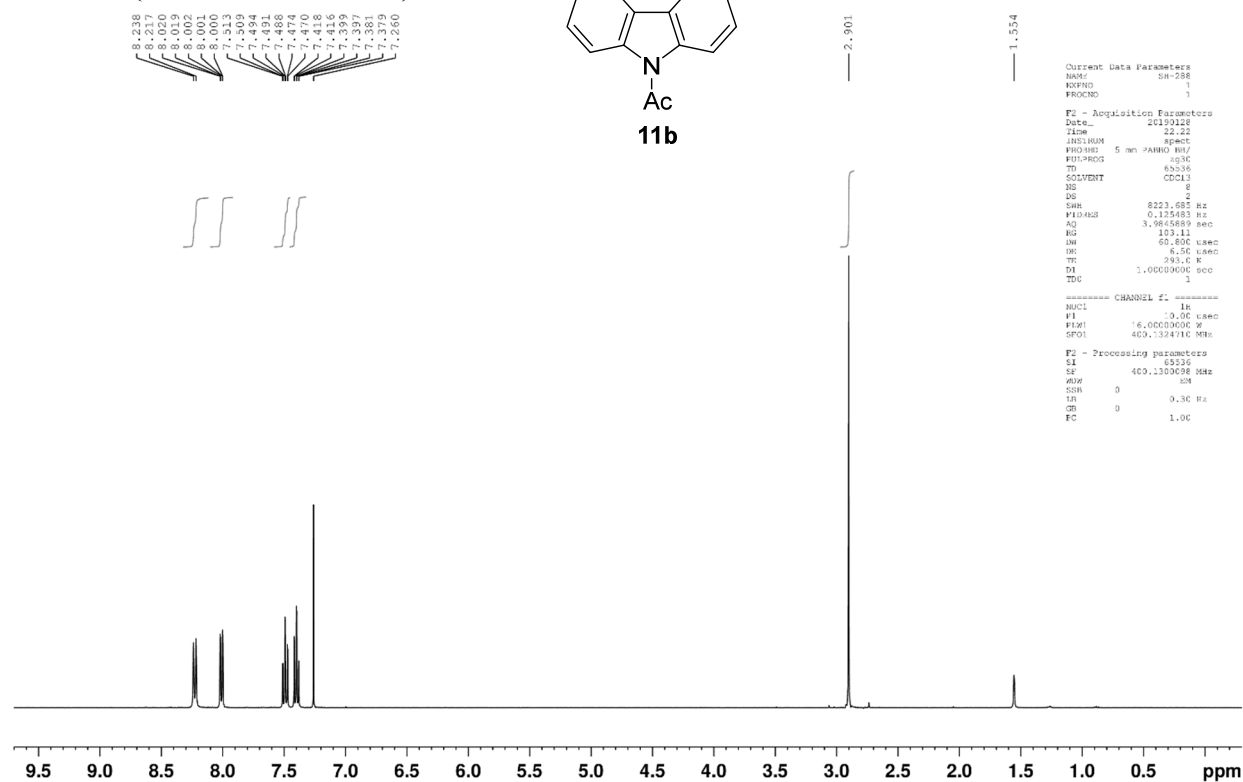 $^{13}\text{C}$  NMR (100 MHz,  $\text{CDCl}_3$ , rt)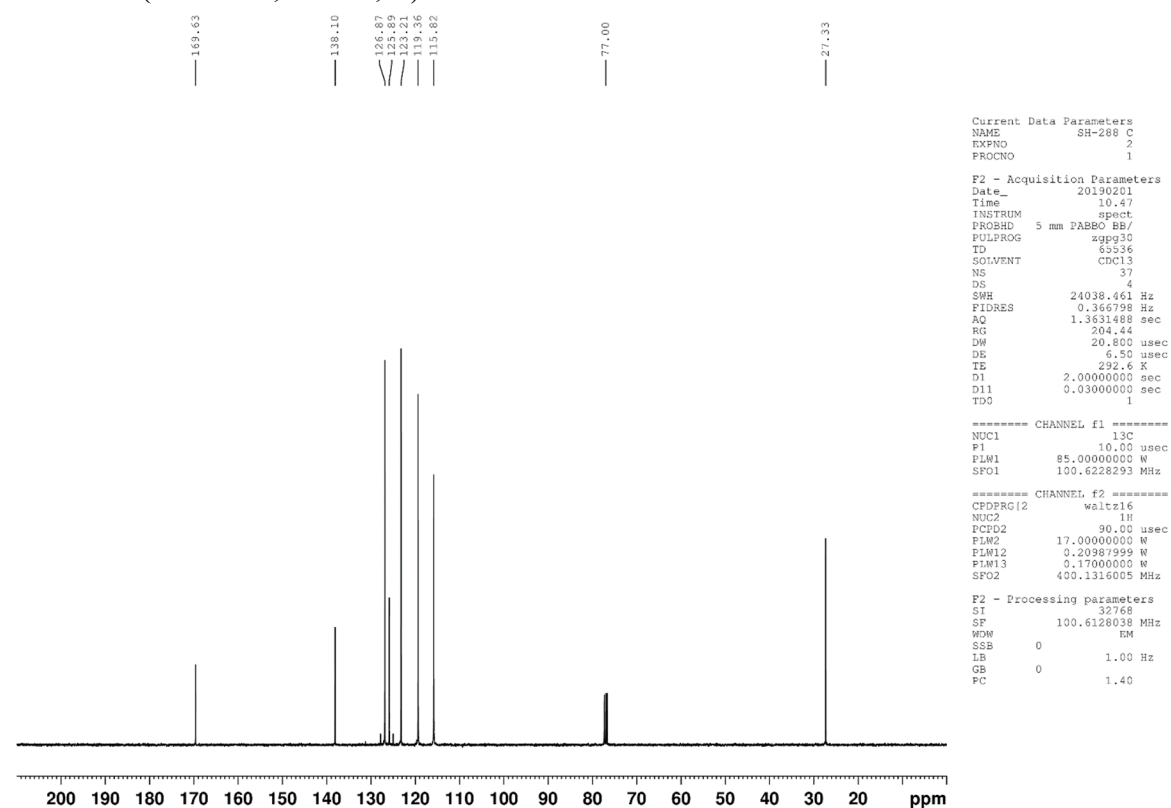

$^1\text{H}$  NMR (400 MHz,  $\text{CDCl}_3$ , rt)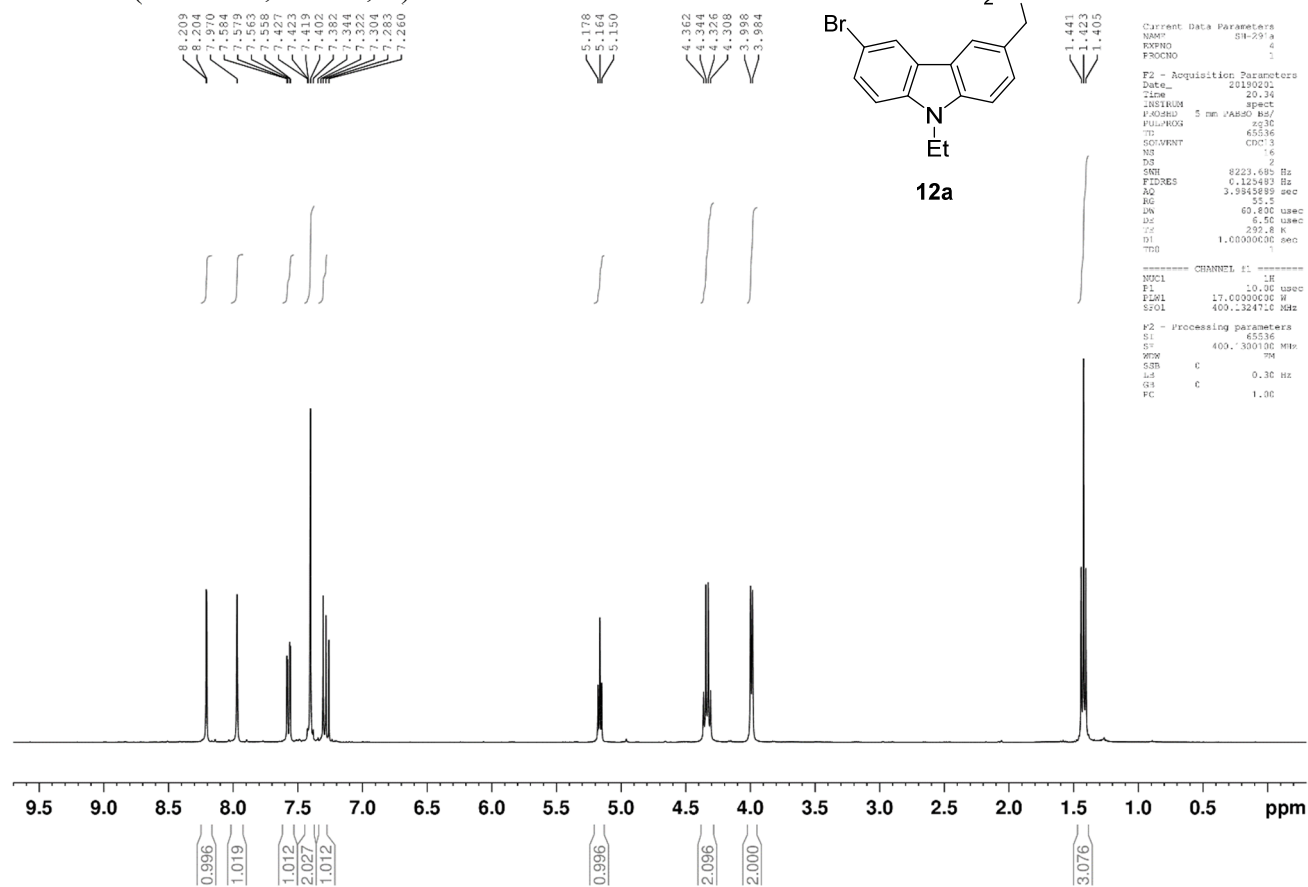 $^{13}\text{C}$  NMR (100 MHz,  $\text{CDCl}_3$ , rt)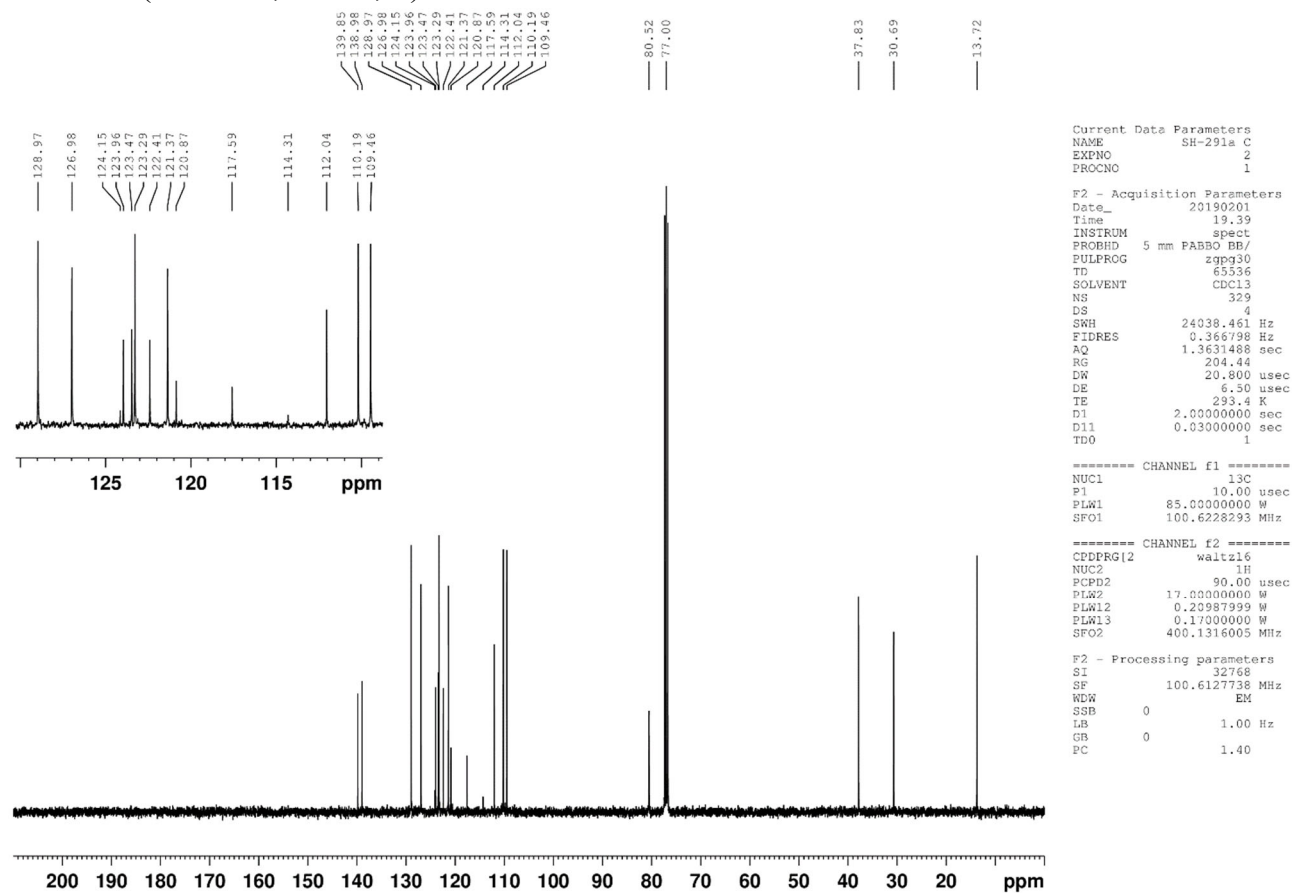

$^{19}\text{F}$  NMR with  $\text{PhCF}_3$  (376 MHz,  $\text{CDCl}_3$ , rt)

```
Current Data Parameters
NAME      SH-291a
EXNO      7
PROCNO    1

F2 - Acquisition Parameters
Date_     23190201
Time      20.50
INSTRUM   spect
PROBHD    5 mm PABBO 90/
PULPROG   zgpg30
TD         131072
SOLVENT   CDCl3
NS         16
DS         4
SWH        89285.711 Hz
FIDRES     0.681196 Hz
AQ         0.7340332 sec
RG         204.44
DW         5.600 usec
DE         6.50 usec
TE         293.1 K
D1         1.6000000 sec
TD0        1

----- CHANNEL f1 -----
NUC1       19F
P1         14.00 usec
PL1        24.0000000 dB
SFO1       376.4607164 MHz

F2 - Processing parameters
SI         65536
SF         376.4987477 MHz
WDW        EM
SSB        0
LB         0.30 Hz
GB         0
PC         1.00
```

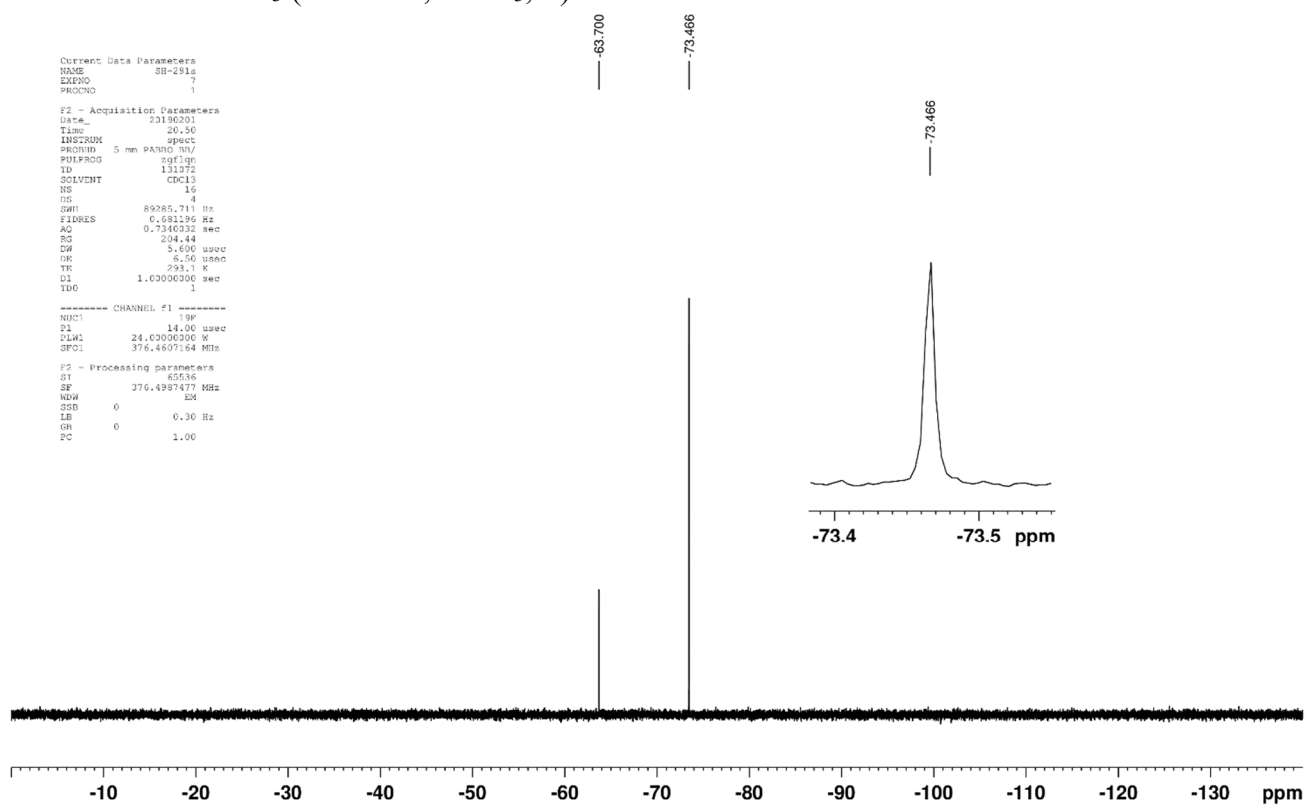

$^1\text{H}$  NMR (400 MHz,  $\text{CDCl}_3$ , rt)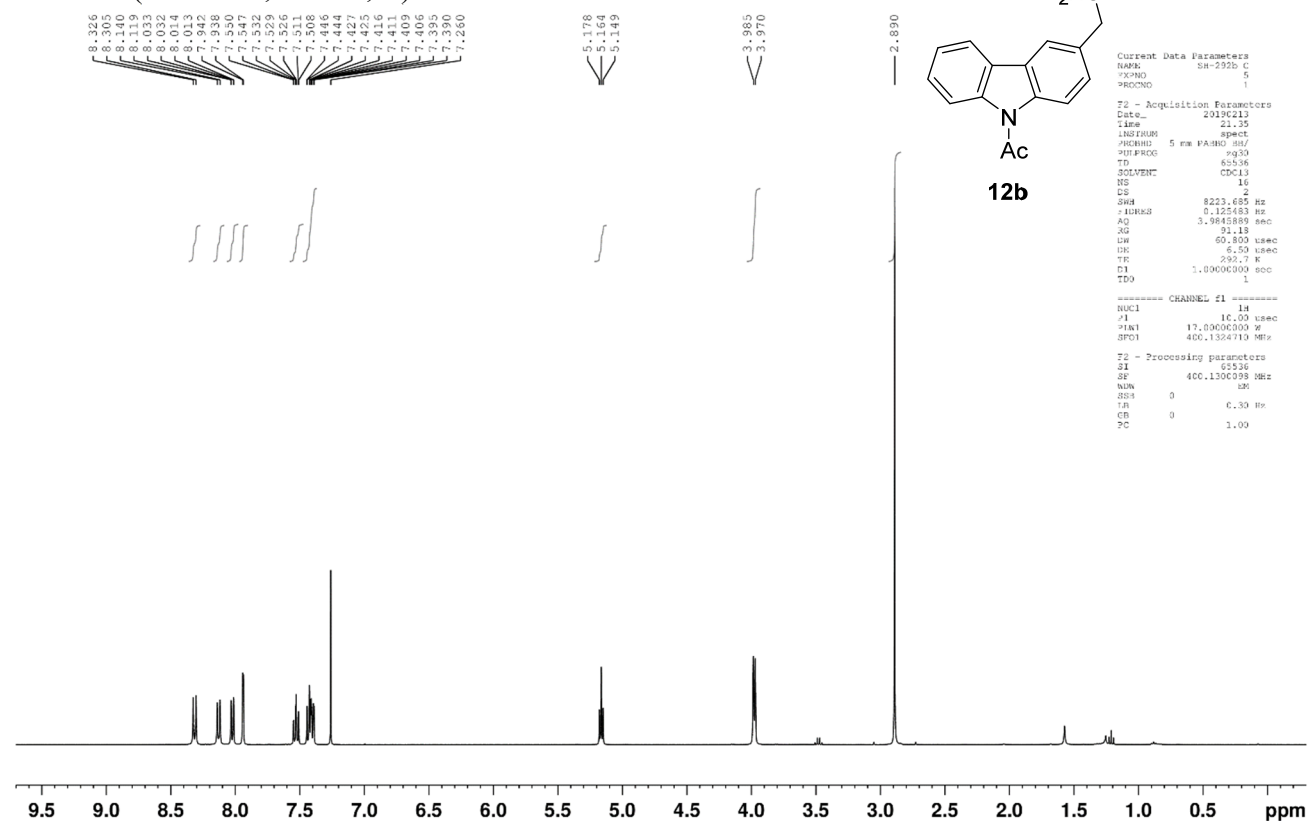 $^{13}\text{C}$  NMR (100 MHz,  $\text{CDCl}_3$ , rt)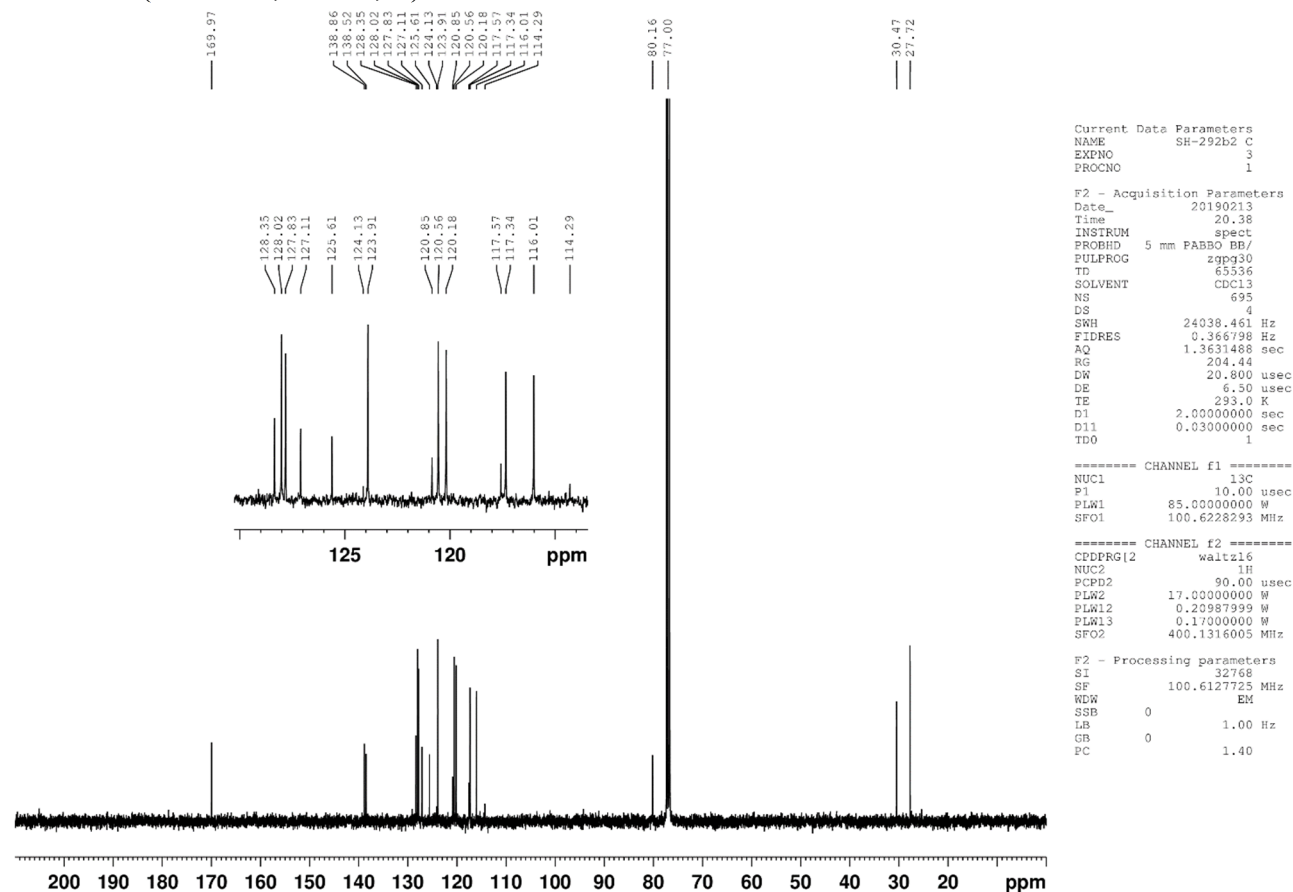



$^{19}\text{F}$  NMR with  $\text{PhCF}_3$  (376 MHz,  $\text{CDCl}_3$ , rt)

```
Current Data Parameters
NAME      SH-797b C
EXPNO     8
PROCNO    1

F2 Acquisition Parameters
Date_     20190214
Time      10.26
INSTRUM   spect
PROBHD    5 mm PABBO BB/
PULPROG   zgpg30
TD         122880
SOLVENT   CDCl3
NS         8
DS         4
SFO       75000.000 Hz
FIDRES    0.610352 Hz
AQ         0.8192000 sec
RG         204.64
SWH        6.467 usec
LE         5.50 usec
TE         300.2 K
SI         1.00000000 sec
D11        0.03000000 sec
TD0
```

```
===== CHANNEL f1 =====
NUC1      19F
P1         14.00 usec
PL1        20.00000000 X
SFO1      376.4607162 MHz
```

```
===== CHANNEL f2 =====
CPDPRG2   waltz16
NUC2       1H
PCPD2     80.00 usec
PLM2      7.05999990 X
PLM12     0.24961001 X
SFO2      400.1316008 MHz
```

```
F2 - Processing parameters
SI         1.00000000 sec
SF         376.4987428 MHz
WDW        EM
SSB        0
GB         0
PC         1.00
```

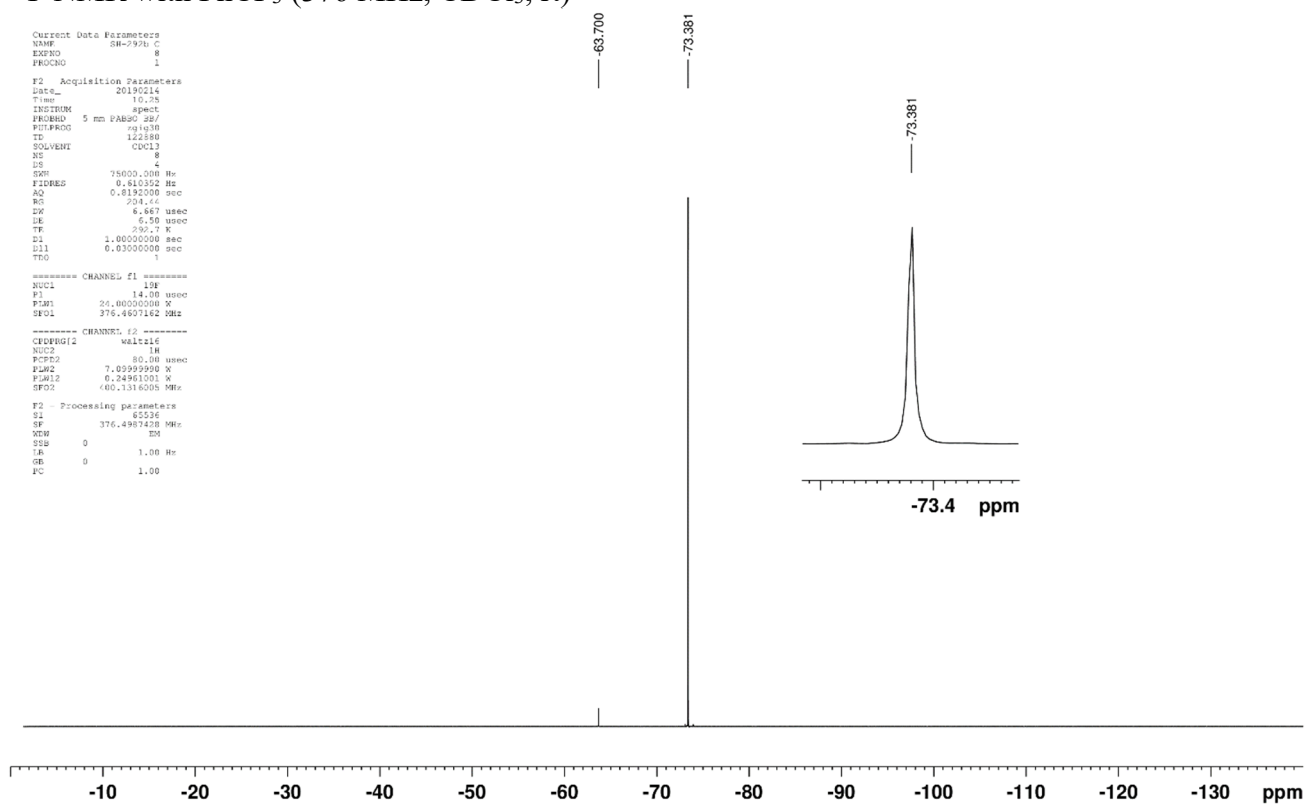

$^1\text{H}$  NMR (400 MHz,  $\text{CDCl}_3$ , rt)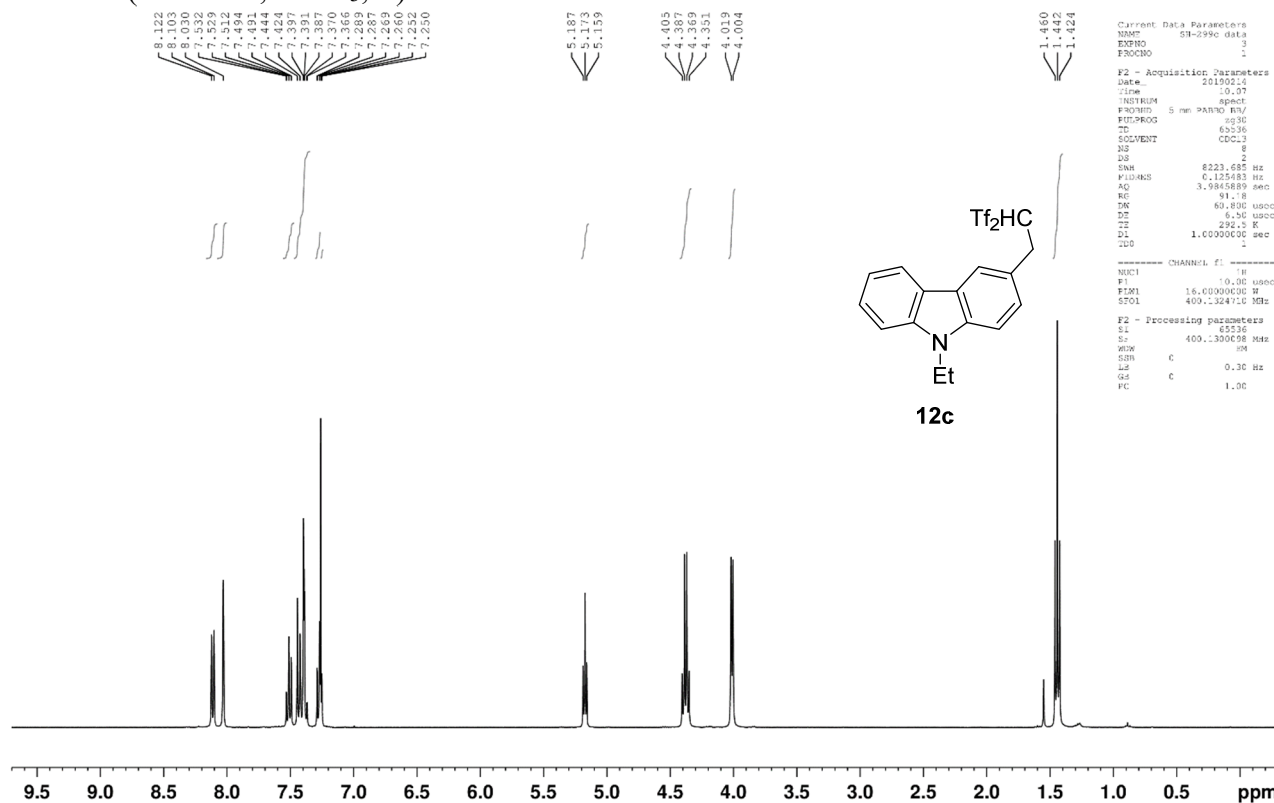 $^{13}\text{C}$  NMR (100 MHz,  $\text{CDCl}_3$ , 25 °C)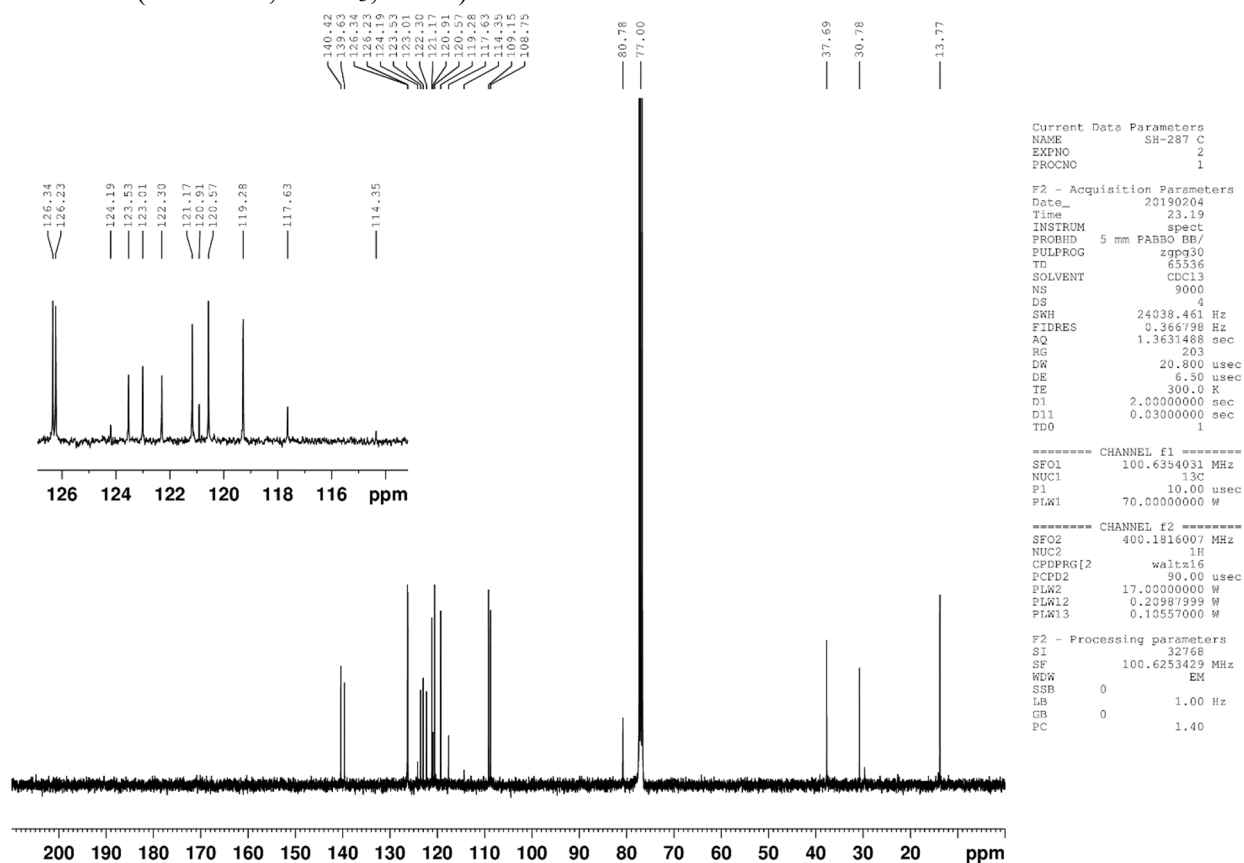

$^{19}\text{F}$  NMR with  $\text{PhCF}_3$  (376 MHz,  $\text{CDCl}_3$ , rt)

```
Current Data Parameters
NAME      00-2379
EXPNO     1
PROCNO    1

F2 - Acquisition Parameters
Date_     20190205
Time     23.15
INSTRUM   spect
PROBHD    5 mm PABBO BB/
PULPROG   zgpg30
TD        132880
SOLVENT   CDCl3
NS        12
DS        1
SFO      376000.000 MHz
FIDRES    0.610332 Hz
AQ        0.8192000 sec
RG        624.44
DE        6.567 usec
TE        6.50 usec
IE        292.2 K
D1        1.00000000 sec
D11       0.03000000 sec
TD0       1
```

```
----- CHANNEL f1 -----
NUC1      19F
P1        14.00 usec
PLA1     24.00000000 K
SFO1     376.4607162 MHz

----- CHANNEL f2 -----
CPDPRG2   waltz16
NUC2      1H
PCPD2     80.00 usec
PLA2     7.09999900 K
PLM12    6.34961001 K
SFO2     400.1316005 MHz
```

```
F2 Processing parameters
SI        62536
SF        376.4987425 MHz
XNU      0
SSB      0
GB       1.00 Hz
PC       1.00
```

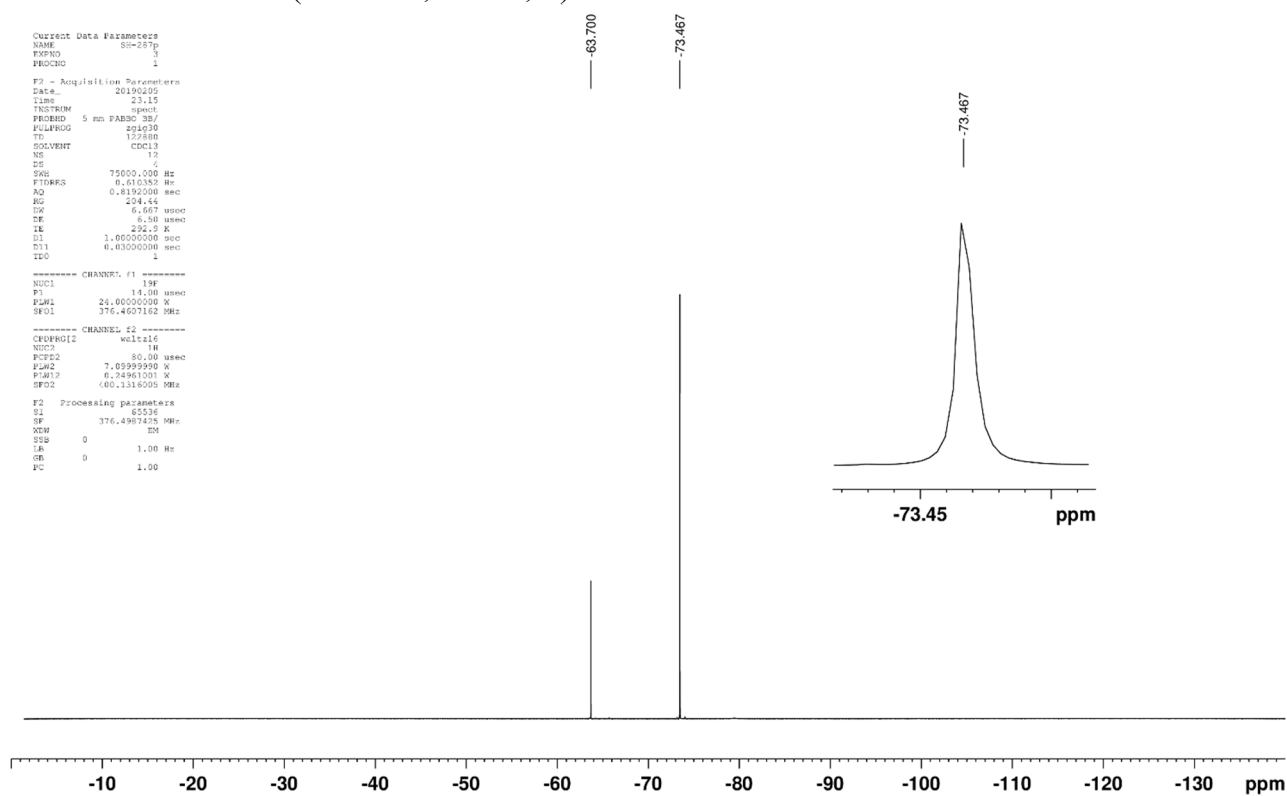

$^1\text{H}$  NMR (400 MHz,  $\text{CDCl}_3$ , rt)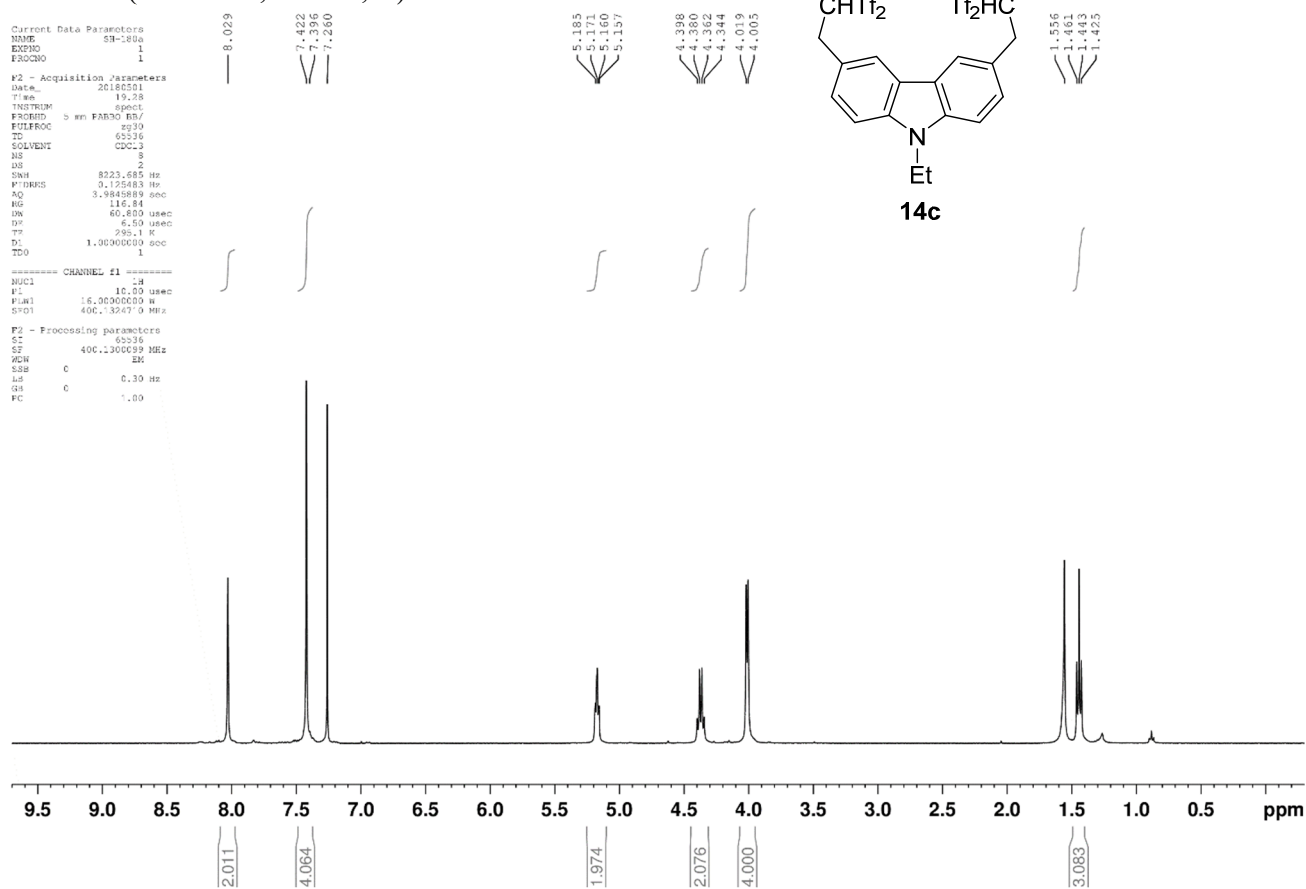 $^{13}\text{C}$  NMR (100 MHz,  $\text{CDCl}_3$ , rt)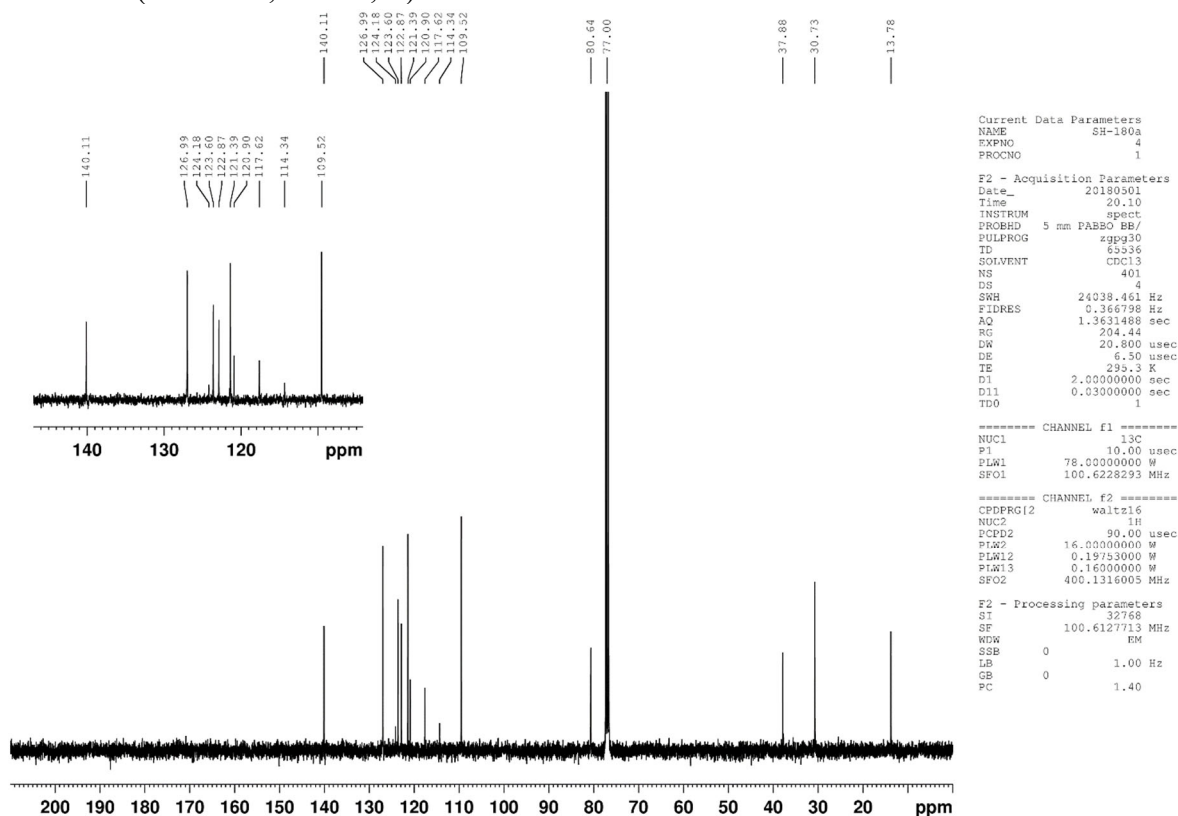

$^{19}\text{F}$  NMR with  $\text{PhCF}_3$  (376 MHz,  $\text{CDCl}_3$ , rt)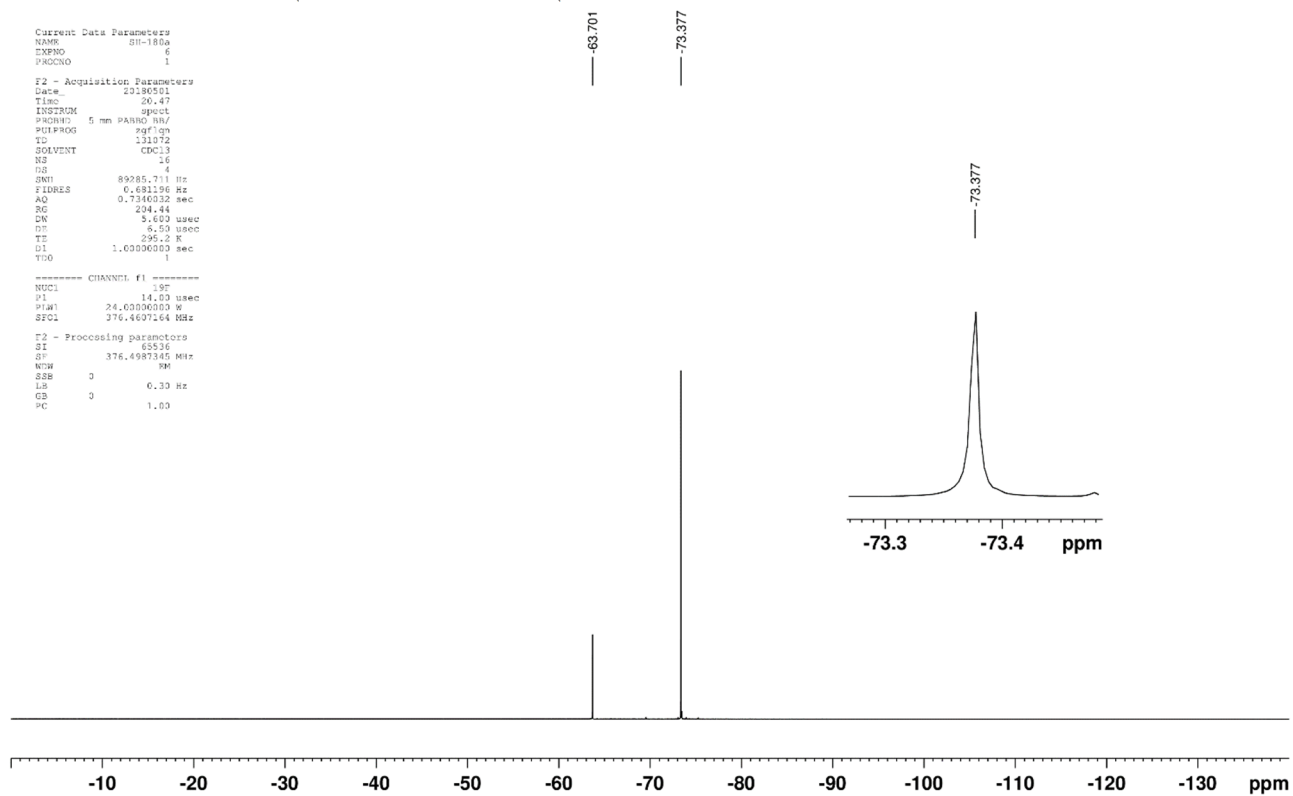

Supplement: c9cc08930f1.pdf [file c9cc08930f1.pdf]
